# Supplementary material for: Micro-RNA Feedback Loops Modulating the Calcineurin/NFAT Signaling Pathway
Source: Noncoding RNA. 2016 May 20;2(2):3. doi: 10.3390/ncrna2020003 (PMC5831902; doi:10.3390/ncrna2020003)
Supplement: Supplementary file 1 [file ncrna-02-00003-s001.xlsx]

## Sheet: miRNAs targeting pathway
Computational prediction of miRNAs targeting calcineurin/NFAT signaling pathway
StarBase			TargetScan			Diana			TarBase 7			miRDB			miRNAMap
miRNA	Gene		Gene	miRNA		Gene	miRNA		Gene	miRNA		miRNA	Gene		miRNA	Gene
hsa-miR-34a-5p	NFATC1		NFATC1	hsa-miR-193a-3p		NFATC1	hsa-miR-506		NFATC1	hsa-miR-942		hsa-miR-4288	NFATC1		hsa-let-7b	NFATC2
hsa-miR-145-5p	NFATC1		NFATC1	hsa-miR-6088		NFATC1	hsa-miR-124		NFATC1	hsa-miR-629-3p		hsa-miR-93-3p	NFATC1		hsa-let-7b	NFATC2
hsa-miR-24-1-5p	NFATC1		NFATC1	hsa-miR-143-3p		NFATC1	hsa-miR-137		NFATC1	hsa-let-7b-5p		hsa-miR-487b-5p	NFATC1		hsa-miR-100	NFATC2
hsa-miR-503-5p	NFATC1		NFATC1	hsa-miR-4770		NFATC1	hsa-miR-143		NFATC1	hsa-miR-124-3p		hsa-miR-487a-5p	NFATC1		hsa-miR-100	NFATC2
						NFATC2	hsa-miR-506		NFATC1	hsa-miR-4999-5p		hsa-miR-874-3p	NFATC1		hsa-miR-125a	NFATC2
hsa-miR-101-3p	NFATC3		NFATC2	hsa-miR-6088		NFATC2	hsa-miR-124		NFATC1	hsa-miR-34a-5p		hsa-miR-506-3p	NFATC1		hsa-miR-125a	NFATC2
hsa-miR-9-5p	NFATC3		NFATC2	hsa-miR-143-3p		NFATC2	hsa-miR-520e		NFATC1	hsa-miR-149-5p		hsa-miR-124-3p	NFATC1		hsa-miR-125b	NFATC2
hsa-miR-29c-3p	NFATC3		NFATC2	hsa-miR-4770		NFATC2	hsa-miR-520d-3p		NFATC1	hsa-miR-664-5p		hsa-miR-632	NFATC1		hsa-miR-125b	NFATC2
hsa-miR-29c-3p	NFATC3					NFATC2	hsa-miR-520c-3p		NFATC2	hsa-miR-9-3p		hsa-miR-7108-3p	NFATC1		hsa-miR-127	NFATC2
hsa-miR-29b-3p	NFATC3		NFATC3	hsa-miR-150-5p		NFATC2	hsa-miR-520b		NFATC2	hsa-miR-24-3p		hsa-miR-761	NFATC1		hsa-miR-127	NFATC2
hsa-miR-29b-3p	NFATC3		NFATC3	hsa-miR-195-5p		NFATC2	hsa-miR-520a-3p		NFATC2	hsa-miR-192-5p		hsa-miR-214-3p	NFATC1		hsa-miR-135a	NFATC2
hsa-miR-29b-3p	NFATC3		NFATC3	hsa-miR-6838-5p		NFATC2	hsa-miR-9		NFATC2	hsa-miR-184		hsa-miR-3619-5p	NFATC1		hsa-miR-135a	NFATC2
hsa-miR-346	NFATC3		NFATC3	hsa-miR-16-5p		NFATC2	hsa-miR-130a		NFATC2	hsa-miR-522-5p		hsa-miR-6805-5p	NFATC1		hsa-miR-135b	NFATC2
hsa-miR-202-3p	NFATC3		NFATC3	hsa-miR-15a-5p		NFATC2	hsa-miR-301a		NFATC3	hsa-miR-93-3p		hsa-miR-6730-3p	NFATC1		hsa-miR-135b	NFATC2
hsa-miR-202-3p	NFATC3		NFATC3	hsa-miR-15b-5p		NFATC2	hsa-miR-301b		NFATC3	hsa-miR-9-5p		hsa-miR-6828-3p	NFATC1		hsa-miR-143	NFATC2
hsa-miR-202-3p	NFATC3		NFATC3	hsa-miR-497-5p		NFATC2	hsa-miR-130b		NFATC3	hsa-miR-361-3p		hsa-miR-3127-5p	NFATC1		hsa-miR-143	NFATC2
hsa-miR-202-3p	NFATC3		NFATC3	hsa-miR-424-5p		NFATC2	hsa-miR-181c		NFATC3	hsa-let-7b-5p		hsa-miR-7853-5p	NFATC1		hsa-miR-146a	NFATC2
hsa-miR-302e	NFATC3					NFATC2	hsa-miR-181a		NFATC3	hsa-miR-9-5p		hsa-miR-3135b	NFATC1		hsa-miR-146a	NFATC2
hsa-miR-302e	NFATC3		NFATC4	hsa-miR-140-3p.2		NFATC2	hsa-miR-181b		NFATC3	hsa-miR-324-3p		hsa-miR-8076	NFATC1		hsa-miR-147	NFATC2
hsa-miR-34c-5p	NFATC3		NFATC4	hsa-miR-29a-3p		NFATC2	hsa-miR-181d		NFATC3	hsa-miR-9-5p		hsa-miR-4438	NFATC1		hsa-miR-147	NFATC2
hsa-miR-613	NFATC3		NFATC4	hsa-miR-29b-3p		NFATC2	hsa-miR-497		NFATC3	hsa-miR-98		hsa-miR-6894-3p	NFATC1		hsa-miR-149*	NFATC2
hsa-miR-613	NFATC3		NFATC4	hsa-miR-29c-3p		NFATC2	hsa-miR-424		NFATC3	hsa-miR-107		hsa-miR-6736-3p	NFATC1		hsa-miR-149*	NFATC2
hsa-miR-135a-5p	NFATC3					NFATC2	hsa-miR-603		NFATC3	hsa-miR-484		hsa-miR-4687-3p	NFATC1		hsa-miR-184	NFATC2
hsa-miR-16-5p	NFATC3		PPP3CA	hsa-miR-31-5p		NFATC2	hsa-miR-548c-3p		NFATC3	hsa-miR-628-5p		hsa-miR-4319	NFATC1		hsa-miR-184	NFATC2
hsa-miR-16-5p	NFATC3					NFATC2	hsa-miR-362-3p		NFATC3	hsa-miR-1207-5p		hsa-miR-4481	NFATC1		hsa-miR-184	NFATC2
			PPP3CB	hsa-miR-30a-5p		NFATC2	hsa-miR-329		NFATC3	hsa-miR-1246		hsa-miR-6081	NFATC1		hsa-miR-189	NFATC2
hsa-miR-29c-3p	NFATC4		PPP3CB	hsa-miR-30b-5p		NFATC2	hsa-miR-7		NFATC3	hsa-miR-4286		hsa-miR-4251	NFATC1		hsa-miR-189	NFATC2
hsa-miR-29b-3p	NFATC4		PPP3CB	hsa-miR-30c-5p		NFATC2	hsa-miR-20b		NFATC3	hsa-miR-4422		hsa-miR-4279	NFATC1		hsa-miR-191	NFATC2
hsa-miR-378b	NFATC4		PPP3CB	hsa-miR-30d-5p		NFATC2	hsa-miR-93		NFATC3	hsa-let-7a-5p		hsa-miR-298	NFATC1		hsa-miR-191	NFATC2
			PPP3CB	hsa-miR-30e-5p		NFATC2	hsa-miR-17		NFATC3	hsa-let-7b-5p		hsa-miR-548e-5p	NFATC1		hsa-miR-210	NFATC2
hsa-miR-30e-5p	PPP3CA		PPP3CB	hsa-miR-23a-3p		NFATC2	hsa-miR-195		NFATC3	hsa-let-7e-5p		hsa-miR-5095	NFATC1		hsa-miR-221	NFATC2
hsa-miR-30e-5p	PPP3CA		PPP3CB	hsa-miR-23b-3p		NFATC2	hsa-miR-520f		NFATC3	hsa-let-7f-5p		hsa-miR-7151-3p	NFATC1		hsa-miR-221	NFATC2
hsa-miR-30c-5p	PPP3CA		PPP3CB	hsa-miR-130a-5p		NFATC2	hsa-miR-15b		NFATC3	hsa-miR-15a-5p		hsa-miR-4486	NFATC1		hsa-miR-24	NFATC2
hsa-miR-30c-5p	PPP3CA		PPP3CB	hsa-miR-23c		NFATC2	hsa-miR-15a		NFATC3	hsa-miR-16-5p		hsa-miR-4328	NFATC1		hsa-miR-24	NFATC2
hsa-miR-186-5p	PPP3CA					NFATC2	hsa-miR-16		NFATC3	hsa-miR-17-5p		hsa-miR-3714	NFATC1		hsa-miR-27b	NFATC2
hsa-miR-186-5p	PPP3CA		PPP3R1	hsa-miR-27a-3p		NFATC2	hsa-miR-103		NFATC3	hsa-miR-18a-5p		hsa-miR-4722-5p	NFATC1		hsa-miR-29a	NFATC2
hsa-miR-186-5p	PPP3CA		PPP3R1	hsa-miR-27b-3p		NFATC2	hsa-miR-107		NFATC3	hsa-miR-23a-3p		hsa-miR-9500	NFATC1		hsa-miR-29a	NFATC2
hsa-miR-186-5p	PPP3CA		PPP3R1	hsa-miR-182-5p		NFATC2	hsa-miR-454		NFATC3	hsa-miR-24-3p		hsa-miR-4656	NFATC1		hsa-miR-29b	NFATC2
hsa-miR-186-5p	PPP3CA					NFATC2	hsa-miR-137		NFATC3	hsa-miR-25-3p		hsa-miR-4724-5p	NFATC1		hsa-miR-29b	NFATC2
hsa-miR-186-5p	PPP3CA		RCAN1	hsa-miR-140-3p.1					NFATC3	hsa-miR-30a-5p		hsa-miR-4492	NFATC1		hsa-miR-29c	NFATC2
hsa-miR-186-5p	PPP3CA					NFATC3	hsa-miR-195		NFATC3	hsa-miR-93-5p		hsa-miR-6815-3p	NFATC1		hsa-miR-302a	NFATC2
hsa-miR-186-5p	PPP3CA		GSK3B	hsa-miR-199a-5p		NFATC3	hsa-miR-16		NFATC3	hsa-miR-103a-3p		hsa-miR-499a-3p	NFATC1		hsa-miR-302a	NFATC2
hsa-miR-197-3p	PPP3CA		GSK3B	hsa-miR-199b-5p		NFATC3	hsa-miR-15b		NFATC3	hsa-miR-192-5p		hsa-miR-4786-3p	NFATC1		hsa-miR-302d	NFATC2
hsa-miR-320b	PPP3CA					NFATC3	hsa-miR-15a		NFATC3	hsa-miR-196a-5p		hsa-miR-499b-3p	NFATC1		hsa-miR-302d	NFATC2
hsa-miR-194-5p	PPP3CA		DYRK1A	hsa-miR-211-5p					NFATC3	hsa-miR-30c-5p		hsa-miR-1468-3p	NFATC1		hsa-miR-363*	NFATC2
hsa-miR-107	PPP3CA		DYRK1A	hsa-miR-204-5p		NFATC4	hsa-miR-29a		NFATC3	hsa-miR-30d-5p		hsa-miR-6801-3p	NFATC1		hsa-miR-363*	NFATC2
hsa-miR-202-3p	PPP3CA		DYRK1A	hsa-miR-221-3p		NFATC4	hsa-miR-424		NFATC3	hsa-miR-7-5p		hsa-miR-1263	NFATC1		hsa-miR-369-5p	NFATC2
hsa-miR-202-3p	PPP3CA		DYRK1A	hsa-miR-222-3p		NFATC4	hsa-miR-29c		NFATC3	hsa-miR-10a-5p		hsa-miR-6810-3p	NFATC1		hsa-miR-369-5p	NFATC2
hsa-miR-202-3p	PPP3CA					NFATC4	hsa-miR-29b		NFATC3	hsa-miR-10b-5p		hsa-miR-4761-3p	NFATC1		hsa-miR-370	NFATC2
hsa-miR-129-5p	PPP3CA		HOMER2	hsa-miR-145-5p					NFATC3	hsa-miR-183-5p		hsa-miR-3622a-5p	NFATC1		hsa-miR-370	NFATC2
			HOMER2	hsa-miR-5195-3p		PPP3CA	hsa-miR-519c-3p		NFATC3	hsa-miR-218-5p		hsa-miR-6772-3p	NFATC1		hsa-miR-372	NFATC2
hsa-miR-200b-3p	PPP3CB					PPP3CA	hsa-miR-519b-3p		NFATC3	hsa-miR-221-3p		hsa-miR-4297	NFATC1		hsa-miR-372	NFATC2
hsa-miR-200a-3p	PPP3CB		ITPR1	hsa-miR-144-3p		PPP3CA	hsa-miR-519a		NFATC3	hsa-miR-222-3p		hsa-miR-152-5p	NFATC1		hsa-miR-373	NFATC2
hsa-miR-429	PPP3CB					PPP3CA	hsa-miR-524-5p		NFATC3	hsa-let-7g-5p					hsa-miR-373	NFATC2
hsa-miR-551a	PPP3CB		MAP3K7	hsa-miR-33a-5p		PPP3CA	hsa-miR-520d-5p		NFATC3	hsa-let-7i-5p		hsa-miR-6809-3p	NFATC2		hsa-miR-378	NFATC2
hsa-miR-551a	PPP3CB		MAP3K7	hsa-miR-33b-5p		PPP3CA	hsa-miR-30a		NFATC3	hsa-miR-15b-5p		hsa-miR-4422	NFATC2		hsa-miR-378	NFATC2
hsa-miR-30e-5p	PPP3CB		MAP3K7	hsa-miR-6088		PPP3CA	hsa-miR-410		NFATC3	hsa-miR-23b-3p		hsa-miR-6762-3p	NFATC2		hsa-miR-383	NFATC2
hsa-miR-30c-5p	PPP3CB		MAP3K7	hsa-miR-143-3p		PPP3CA	hsa-miR-30d		NFATC3	hsa-miR-30b-5p		hsa-miR-3155a	NFATC2		hsa-miR-383	NFATC2
hsa-miR-101-3p	PPP3CB		MAP3K7	hsa-miR-4770		PPP3CA	hsa-miR-30e		NFATC3	hsa-miR-125b-5p		hsa-miR-3155b	NFATC2		hsa-miR-422b	NFATC2
hsa-miR-197-3p	PPP3CB					PPP3CA	hsa-miR-30b		NFATC3	hsa-miR-9-5p		hsa-miR-153-3p	NFATC2		hsa-miR-422b	NFATC2
hsa-miR-320b	PPP3CB		TAB1	hsa-miR-3064-5p		PPP3CA	hsa-miR-30c		NFATC3	hsa-miR-185-5p		hsa-miR-6817-3p	NFATC2		hsa-miR-431	NFATC2
hsa-miR-190b	PPP3CB		TAB1	hsa-miR-6504-5p		PPP3CA	hsa-miR-99a		NFATC3	hsa-miR-195-5p		hsa-miR-3688-3p	NFATC2		hsa-miR-431	NFATC2
hsa-miR-9-5p	PPP3CB					PPP3CA	hsa-miR-100		NFATC3	hsa-miR-30e-5p		hsa-miR-137	NFATC2		hsa-miR-431	NFATC2
hsa-miR-488-3p	PPP3CB		TAB2	hsa-let-7a-5p		PPP3CA	hsa-miR-300		NFATC3	hsa-miR-378a-3p		hsa-miR-2115-5p	NFATC2		hsa-miR-483-5p	NFATC2
hsa-miR-181b-5p	PPP3CB		TAB2	hsa-let-7b-5p		PPP3CA	hsa-miR-381		NFATC3	hsa-miR-196b-5p		hsa-miR-647	NFATC2		hsa-miR-483-5p	NFATC2
hsa-miR-181b-5p	PPP3CB		TAB2	hsa-let-7c-5p		PPP3CA	hsa-miR-520g		NFATC3	hsa-miR-589-3p		hsa-miR-4448	NFATC2		hsa-miR-485-5p	NFATC2
hsa-miR-181a-5p	PPP3CB		TAB2	hsa-let-7d-5p		PPP3CA	hsa-miR-520h		NFATC3	hsa-miR-660-5p		hsa-miR-4261	NFATC2		hsa-miR-485-5p	NFATC2
hsa-miR-181a-5p	PPP3CB		TAB2	hsa-let-7e-5p		PPP3CA	hsa-let-7e		NFATC3	hsa-miR-340-5p		hsa-miR-4446-3p	NFATC2		hsa-miR-492	NFATC2
hsa-miR-181a-5p	PPP3CB		TAB2	hsa-let-7f-5p		PPP3CA	hsa-let-7b		NFATC3	hsa-miR-1260a		hsa-miR-484	NFATC2		hsa-miR-492	NFATC2
hsa-miR-194-5p	PPP3CB		TAB2	hsa-let-7g-5p		PPP3CA	hsa-let-7i		NFATC3	hsa-miR-548o-3p		hsa-miR-4293	NFATC2		hsa-miR-493-3p	NFATC2
hsa-miR-146b-5p	PPP3CB		TAB2	hsa-let-7i-5p		PPP3CA	hsa-let-7g		NFATC3	hsa-miR-3127-5p		hsa-miR-30e-5p	NFATC2		hsa-miR-493-3p	NFATC2
			TAB2	hsa-miR-4500		PPP3CA	hsa-let-7f		NFATC3	hsa-miR-2355-5p		hsa-miR-30b-5p	NFATC2		hsa-miR-494	NFATC2
hsa-miR-200b-3p	PPP3R1		TAB2	hsa-miR-4458		PPP3CA	hsa-miR-20b		NFATC3	hsa-miR-125a-5p		hsa-miR-3680-3p	NFATC2		hsa-miR-494	NFATC2
hsa-miR-200a-3p	PPP3R1		TAB2	hsa-miR-98-5p		PPP3CA	hsa-miR-93		NFATC3	hsa-miR-338-3p		hsa-miR-30a-5p	NFATC2		hsa-miR-515-3p	NFATC2
hsa-miR-200a-3p	PPP3R1					PPP3CA	hsa-miR-17		NFATC3	hsa-miR-34a-5p		hsa-miR-30c-5p	NFATC2		hsa-miR-515-3p	NFATC2
hsa-miR-429	PPP3R1		CSNK1A1	hsa-miR-203a-3p.1		PPP3CA	hsa-miR-98		NFATC3	hsa-miR-182-5p		hsa-miR-30d-5p	NFATC2		hsa-miR-518c*	NFATC2
hsa-miR-429	PPP3R1		CSNK1A1	hsa-miR-200a-3p		PPP3CA	hsa-let-7c		NFATC3	hsa-miR-218-5p		hsa-miR-6781-3p	NFATC2		hsa-miR-518c*	NFATC2
hsa-miR-34a-5p	PPP3R1		CSNK1A1	hsa-miR-141-3p		PPP3CA	hsa-let-7a		NFATC3	hsa-miR-9-5p		hsa-miR-3686	NFATC2		hsa-miR-518f*	NFATC2
hsa-miR-34a-5p	PPP3R1					PPP3CA	hsa-miR-145		NFATC3	hsa-miR-522-5p		hsa-miR-2682-3p	NFATC2		hsa-miR-518f*	NFATC2
hsa-miR-30e-5p	PPP3R1		LRRK2	hsa-miR-205-5p		PPP3CA	hsa-miR-106a		NFATC4	hsa-miR-625-5p		hsa-miR-875-3p	NFATC2		hsa-miR-520b	NFATC2
hsa-miR-30c-5p	PPP3R1					PPP3CA	hsa-miR-153		NFATC4	hsa-miR-27a-5p		hsa-miR-4251	NFATC2		hsa-miR-520b	NFATC2
hsa-miR-30c-5p	PPP3R1		CABIN1	hsa-miR-376a-3p		PPP3CA	hsa-miR-502-3p		PPP3CA	hsa-miR-30a-5p		hsa-miR-4524a-3p	NFATC2		hsa-miR-520c	NFATC2
hsa-miR-101-3p	PPP3R1		CABIN1	hsa-miR-376b-3p		PPP3CA	hsa-miR-495		PPP3CA	hsa-miR-145-5p		hsa-miR-612	NFATC2		hsa-miR-520c	NFATC2
hsa-miR-101-3p	PPP3R1					PPP3CA	hsa-miR-501-3p		PPP3CA	hsa-miR-30a-5p		hsa-miR-2355-5p	NFATC2		hsa-miR-520f	NFATC2
hsa-miR-101-3p	PPP3R1		AKAP5	hsa-miR-520c-3p		PPP3CA	hsa-miR-340		PPP3CA	hsa-miR-30a-5p		hsa-miR-6758-3p	NFATC2		hsa-miR-520f	NFATC2
hsa-miR-101-3p	PPP3R1		AKAP5	hsa-miR-520a-3p		PPP3CA	hsa-miR-96		PPP3CA	hsa-miR-145-5p		hsa-miR-1285-3p	NFATC2		hsa-miR-526a	NFATC2
hsa-miR-101-3p	PPP3R1		AKAP5	hsa-miR-520b		PPP3CA	hsa-miR-520c-3p		PPP3CA	hsa-miR-324-5p		hsa-miR-6511b-5p	NFATC2		hsa-miR-526a	NFATC2
hsa-miR-186-5p	PPP3R1		AKAP5	hsa-miR-520d-3p		PPP3CA	hsa-miR-520b		PPP3CA	hsa-miR-429		hsa-miR-3187-5p	NFATC2		hsa-miR-526c	NFATC2
hsa-miR-197-3p	PPP3R1		AKAP5	hsa-miR-520e		PPP3CA	hsa-miR-520d-3p		PPP3CA	hsa-miR-548d-5p		hsa-miR-4303	NFATC2		hsa-miR-526c	NFATC2
hsa-miR-320b	PPP3R1		AKAP5	hsa-miR-302a-3p		PPP3CA	hsa-miR-520e		PPP3CA	hsa-miR-190b		hsa-miR-6860	NFATC2		hsa-miR-549	NFATC2
hsa-miR-320b	PPP3R1		AKAP5	hsa-miR-302b-3p		PPP3CA	hsa-miR-520a-3p		PPP3CA	hsa-miR-885-3p		hsa-miR-5189-5p	NFATC2		hsa-miR-549	NFATC2
hsa-miR-190b	PPP3R1		AKAP5	hsa-miR-302c-3p.1		PPP3CA	hsa-miR-182		PPP3CA	hsa-miR-940		hsa-miR-6811-5p	NFATC2		hsa-miR-565	NFATC2
			AKAP5	hsa-miR-302d-3p		PPP3CA	hsa-miR-889		PPP3CA	hsa-miR-1246		hsa-miR-6736-3p	NFATC2		hsa-miR-565	NFATC2
hsa-miR-34a-5p	RCAN1		AKAP5	hsa-miR-302e		PPP3CA	hsa-miR-142-3p		PPP3CA	hsa-miR-1825		hsa-miR-4494	NFATC2		hsa-miR-571	NFATC2
hsa-miR-30e-5p	RCAN1		AKAP5	hsa-miR-372-3p		PPP3CA	hsa-miR-770-5p		PPP3CA	hsa-miR-3615		hsa-miR-3619-5p	NFATC2		hsa-miR-571	NFATC2
hsa-miR-30c-5p	RCAN1		AKAP5	hsa-miR-373-3p					PPP3CA	hsa-miR-3653		hsa-miR-214-3p	NFATC2		hsa-miR-572	NFATC2
hsa-miR-197-3p	RCAN1					PPP3CB	hsa-miR-26b		PPP3CA	hsa-miR-3662		hsa-miR-4306	NFATC2		hsa-miR-572	NFATC2
hsa-miR-488-5p	RCAN1		CALM1	hsa-miR-129-5p		PPP3CB	hsa-miR-26a		PPP3CA	hsa-miR-4511		hsa-miR-761	NFATC2		hsa-miR-587	NFATC2
hsa-miR-194-5p	RCAN1					PPP3CB	hsa-miR-30a		PPP3CA	hsa-miR-20a-5p		hsa-miR-4282	NFATC2		hsa-miR-587	NFATC2
hsa-miR-107	RCAN1		STIM1	hsa-miR-223-3p		PPP3CB	hsa-miR-30d		PPP3CA	hsa-miR-30a-5p		hsa-miR-4311	NFATC2		hsa-miR-593	NFATC2
hsa-miR-107	RCAN1					PPP3CB	hsa-miR-30e		PPP3CA	hsa-miR-30a-5p		hsa-miR-132-3p	NFATC2		hsa-miR-593	NFATC2
hsa-miR-202-5p	RCAN1		ORAI1	hsa-miR-519d-3p		PPP3CB	hsa-miR-30b		PPP3CA	hsa-miR-30c-5p		hsa-miR-3182	NFATC2		hsa-miR-595	NFATC2
hsa-miR-202-5p	RCAN1		ORAI1	hsa-miR-20a-5p		PPP3CB	hsa-miR-30c		PPP3CA	hsa-miR-30d-5p		hsa-miR-3138	NFATC2		hsa-miR-595	NFATC2
hsa-miR-202-5p	RCAN1		ORAI1	hsa-miR-526b-3p		PPP3CB	hsa-miR-424		PPP3CA	hsa-miR-10a-5p		hsa-miR-1224-5p	NFATC2		hsa-miR-608	NFATC2
hsa-miR-34c-5p	RCAN1		ORAI1	hsa-miR-106b-5p		PPP3CB	hsa-miR-340		PPP3CA	hsa-miR-34a-5p		hsa-miR-212-3p	NFATC2		hsa-miR-611	NFATC2
hsa-miR-4500	RCAN1		ORAI1	hsa-miR-106a-5p		PPP3CB	hsa-miR-559		PPP3CA	hsa-miR-221-3p		hsa-miR-3614-5p	NFATC2		hsa-miR-612	NFATC2
hsa-miR-4500	RCAN1		ORAI1	hsa-miR-17-5p		PPP3CB	hsa-miR-768-3p		PPP3CA	hsa-miR-200b-3p		hsa-miR-452-5p	NFATC2		hsa-miR-612	NFATC2
hsa-miR-433-3p	RCAN1		ORAI1	hsa-miR-20b-5p					PPP3CA	hsa-miR-30b-5p		hsa-miR-892c-3p	NFATC2		hsa-miR-632	NFATC2
hsa-miR-495-3p	RCAN1		ORAI1	hsa-miR-93-5p		PPP3R2	hsa-miR-495		PPP3CA	hsa-miR-186-5p		hsa-miR-3973	NFATC2		hsa-miR-632	NFATC2
hsa-miR-544a	RCAN1					PPP3R2	hsa-miR-138		PPP3CA	hsa-miR-190a		hsa-miR-4676-3p	NFATC2		hsa-miR-634	NFATC2
hsa-miR-154-5p	RCAN1					PPP3R2	hsa-miR-145		PPP3CA	hsa-miR-200c-3p		hsa-miR-6747-5p	NFATC2		hsa-miR-634	NFATC2
hsa-miR-496	RCAN1					PPP3R2	hsa-miR-875-3p		PPP3CA	hsa-miR-30e-5p		hsa-miR-4692	NFATC2		hsa-miR-637	NFATC2
hsa-miR-190a-5p	RCAN1								PPP3CA	hsa-miR-361-5p		hsa-miR-4514	NFATC2		hsa-miR-644	NFATC2
						RCAN1	hsa-miR-506		PPP3CA	hsa-miR-323a-3p		hsa-miR-4291	NFATC2		hsa-miR-644	NFATC2
hsa-miR-200b-3p	GSK3B					RCAN1	hsa-miR-124		PPP3CA	hsa-miR-449b-5p		hsa-miR-130b-5p	NFATC2		hsa-miR-645	NFATC2
hsa-miR-30e-5p	GSK3B					RCAN1	hsa-miR-323-3p		PPP3CA	hsa-miR-454-3p		hsa-miR-7978	NFATC2		hsa-miR-645	NFATC2
hsa-miR-30c-5p	GSK3B								PPP3CA	hsa-let-7f-1-3p		hsa-miR-5586-5p	NFATC2		hsa-miR-650	NFATC2
hsa-miR-761	GSK3B					GSK3B	hsa-miR-26b		PPP3CA	hsa-miR-22-5p		hsa-miR-4256	NFATC2		hsa-miR-650	NFATC2
hsa-miR-761	GSK3B					GSK3B	hsa-miR-26a		PPP3CA	hsa-miR-125b-2-3p		hsa-miR-124-3p	NFATC2		hsa-miR-650	NFATC2
hsa-miR-761	GSK3B								PPP3CA	hsa-miR-130b-5p		hsa-miR-187-5p	NFATC2		hsa-miR-654	NFATC2
hsa-miR-101-3p	GSK3B					DYRK1A	hsa-miR-101		PPP3CA	hsa-miR-340-5p		hsa-miR-506-3p	NFATC2		hsa-miR-654	NFATC2
hsa-miR-101-3p	GSK3B					DYRK1A	hsa-miR-20b		PPP3CA	hsa-miR-873-5p		hsa-miR-6782-5p	NFATC2		hsa-miR-658	NFATC2
hsa-miR-101-3p	GSK3B					DYRK1A	hsa-miR-17		PPP3CA	hsa-miR-522-5p		hsa-miR-570-3p	NFATC2		hsa-miR-658	NFATC2
hsa-miR-101-3p	GSK3B					DYRK1A	hsa-miR-93		PPP3CB	hsa-miR-30e-5p		hsa-miR-4419a	NFATC2		hsa-miR-661	NFATC2
hsa-miR-101-3p	GSK3B					DYRK1A	hsa-let-7d		PPP3CB	hsa-miR-30b-5p		hsa-miR-548e-5p	NFATC2		hsa-miR-661	NFATC2
hsa-miR-101-3p	GSK3B					DYRK1A	hsa-miR-519c-3p		PPP3CB	hsa-miR-141-5p		hsa-miR-3915	NFATC2		hsa-miR-662	NFATC2
hsa-miR-101-3p	GSK3B					DYRK1A	hsa-miR-519b-3p		PPP3CB	hsa-miR-30a-5p		hsa-miR-6839-3p	NFATC2		hsa-miR-662	NFATC2
hsa-miR-101-3p	GSK3B					DYRK1A	hsa-miR-519a		PPP3CB	hsa-miR-30d-5p		hsa-miR-8068	NFATC2		hsa-miR-671	NFATC2
hsa-miR-137	GSK3B					DYRK1A	hsa-miR-144		PPP3CB	hsa-miR-30c-5p		hsa-miR-3934-3p	NFATC2		hsa-miR-671	NFATC2
hsa-miR-320b	GSK3B					DYRK1A	hsa-miR-519d		PPP3CB	hsa-miR-101-3p		hsa-miR-6868-3p	NFATC2		hsa-miR-675	NFATC2
hsa-miR-92b-3p	GSK3B					DYRK1A	hsa-let-7e		PPP3CB	hsa-miR-22-5p		hsa-miR-4441	NFATC2		hsa-miR-675	NFATC2
hsa-miR-214-3p	GSK3B					DYRK1A	hsa-miR-148b		PPP3CB	hsa-miR-200a-5p		hsa-miR-6873-5p	NFATC2		hsa-miR-765	NFATC2
hsa-miR-214-3p	GSK3B					DYRK1A	hsa-miR-221		PPP3CB	hsa-miR-193a-3p		hsa-miR-193b-5p	NFATC2		hsa-miR-765	NFATC2
hsa-miR-214-3p	GSK3B					DYRK1A	hsa-miR-152		PPP3CB	hsa-miR-10b-5p		hsa-miR-495-3p	NFATC2		hsa-miR-767-5p	NFATC2
						DYRK1A	hsa-miR-98		PPP3CB	hsa-miR-107		hsa-miR-760	NFATC2		hsa-miR-767-5p	NFATC2
hsa-miR-200a-3p	DYRK1A					DYRK1A	hsa-miR-222		PPP3CB	hsa-miR-548a-5p		hsa-miR-4262	NFATC2		hsa-miR-768-5p	NFATC2
hsa-miR-378f	DYRK1A					DYRK1A	hsa-let-7b		PPP3CB	hsa-miR-1301		hsa-miR-512-5p	NFATC2		hsa-miR-769-3p	NFATC2
hsa-miR-378f	DYRK1A					DYRK1A	hsa-let-7c		PPP3CB	hsa-miR-548j		hsa-miR-5688	NFATC2		hsa-miR-769-3p	NFATC2
hsa-miR-378f	DYRK1A					DYRK1A	hsa-let-7a		PPP3CB	hsa-miR-548n		hsa-miR-6847-5p	NFATC2		hsa-miR-801	NFATC2
hsa-miR-30e-5p	DYRK1A					DYRK1A	hsa-let-7i		PPP3CB	hsa-miR-548ax		hsa-miR-548ar-3p	NFATC2		hsa-miR-99a	NFATC2
hsa-miR-30e-3p	DYRK1A					DYRK1A	hsa-let-7g		PPP3CB	hsa-miR-103a-3p		hsa-miR-6837-5p	NFATC2		hsa-miR-99a	NFATC2
hsa-miR-30c-5p	DYRK1A					DYRK1A	hsa-let-7f		PPP3CB	hsa-miR-548h-5p		hsa-miR-548f-3p	NFATC2
hsa-miR-101-3p	DYRK1A					DYRK1A	hsa-miR-153		PPP3CB	hsa-miR-622		hsa-miR-548e-3p	NFATC2		hsa-let-7e	NFATC3
hsa-miR-101-3p	DYRK1A					DYRK1A	hsa-miR-506		PPP3CB	hsa-miR-582-3p		hsa-miR-4685-5p	NFATC2		hsa-let-7e	NFATC3
hsa-miR-101-3p	DYRK1A					DYRK1A	hsa-miR-522		PPP3CB	hsa-miR-941		hsa-miR-548az-3p	NFATC2		hsa-miR-103	NFATC3
hsa-miR-101-3p	DYRK1A					DYRK1A	hsa-miR-124		PPP3CB	hsa-miR-378c		hsa-miR-5584-5p	NFATC2		hsa-miR-103	NFATC3
hsa-miR-186-5p	DYRK1A					DYRK1A	hsa-miR-520d-5p		PPP3CB	hsa-miR-378d		hsa-miR-759	NFATC2		hsa-miR-105	NFATC3
hsa-miR-137	DYRK1A					DYRK1A	hsa-miR-524-5p		PPP3CB	hsa-miR-17-3p		hsa-miR-1909-3p	NFATC2		hsa-miR-105	NFATC3
hsa-miR-137	DYRK1A					DYRK1A	hsa-miR-106a		PPP3CB	hsa-miR-182-5p		hsa-miR-548a-3p	NFATC2		hsa-miR-1275	NFATC3
hsa-miR-197-3p	DYRK1A					DYRK1A	hsa-miR-369-3p		PPP3CB	hsa-miR-181a-3p		hsa-miR-6868-5p	NFATC2		hsa-miR-129	NFATC3
hsa-miR-9-5p	DYRK1A					DYRK1A	hsa-miR-148a		PPP3CB	hsa-miR-378a-3p		hsa-miR-6722-3p	NFATC2		hsa-miR-133a	NFATC3
hsa-miR-9-5p	DYRK1A					DYRK1A	hsa-miR-372		PPP3CB	hsa-miR-29a-5p		hsa-miR-6506-5p	NFATC2		hsa-miR-133a	NFATC3
hsa-miR-9-5p	DYRK1A					DYRK1A	hsa-miR-520c-3p		PPP3CB	hsa-miR-744-3p		hsa-miR-5001-3p	NFATC2		hsa-miR-133b	NFATC3
hsa-miR-9-5p	DYRK1A					DYRK1A	hsa-miR-520b		PPP3CB	hsa-miR-103a-2-5p		hsa-miR-511-3p	NFATC2		hsa-miR-133b	NFATC3
hsa-miR-9-5p	DYRK1A					DYRK1A	hsa-miR-520d-3p		PPP3CB	hsa-miR-133a		hsa-miR-619-5p	NFATC2		hsa-miR-142-5p	NFATC3
						DYRK1A	hsa-miR-520e		PPP3R1	hsa-miR-20a-5p		hsa-miR-222-3p	NFATC2		hsa-miR-149*	NFATC3
hsa-miR-200b-3p	ITPR1					DYRK1A	hsa-miR-520a-3p		PPP3R1	hsa-miR-106b-5p		hsa-miR-221-3p	NFATC2		hsa-miR-149*	NFATC3
hsa-miR-429	ITPR1					DYRK1A	hsa-miR-495		PPP3R1	hsa-miR-106a-5p		hsa-miR-6872-3p	NFATC2		hsa-miR-149*	NFATC3
hsa-miR-429	ITPR1					DYRK1A	hsa-miR-876-3p		PPP3R1	hsa-miR-182-5p		hsa-miR-6165	NFATC2		hsa-miR-150	NFATC3
hsa-miR-34a-5p	ITPR1					DYRK1A	hsa-miR-944		PPP3R1	hsa-miR-96-5p		hsa-miR-1226-5p	NFATC2		hsa-miR-151	NFATC3
hsa-miR-101-3p	ITPR1					DYRK1A	hsa-miR-26a		PPP3R1	hsa-miR-372		hsa-miR-4721	NFATC2		hsa-miR-15a	NFATC3
hsa-miR-101-3p	ITPR1					DYRK1A	hsa-miR-26b		PPP3R1	hsa-miR-30c-5p		hsa-miR-3135b	NFATC2		hsa-miR-15a	NFATC3
hsa-miR-186-5p	ITPR1					DYRK1A	hsa-miR-409-5p		PPP3R1	hsa-miR-30b-5p		hsa-miR-516b-3p	NFATC2		hsa-miR-15a	NFATC3
hsa-miR-137	ITPR1					DYRK1A	hsa-miR-550		PPP3R1	hsa-miR-30e-5p		hsa-miR-890	NFATC2		hsa-miR-15b	NFATC3
hsa-miR-92b-3p	ITPR1					DYRK1A	hsa-miR-202		PPP3R1	hsa-miR-30a-5p		hsa-miR-7162-5p	NFATC2		hsa-miR-15b	NFATC3
hsa-miR-92b-3p	ITPR1					DYRK1A	hsa-miR-9		PPP3R1	hsa-miR-30a-5p		hsa-miR-1184	NFATC2		hsa-miR-15b	NFATC3
hsa-miR-214-3p	ITPR1					DYRK1A	hsa-miR-877		PPP3R1	hsa-miR-30d-5p		hsa-miR-516a-3p	NFATC2		hsa-miR-16	NFATC3
hsa-miR-488-3p	ITPR1					DYRK1A	hsa-miR-655		PPP3R1	hsa-miR-340-5p		hsa-miR-4476	NFATC2		hsa-miR-16	NFATC3
hsa-miR-107	ITPR1					DYRK1A	hsa-miR-374b		PPP3R1	hsa-miR-298		hsa-miR-6835-3p	NFATC2		hsa-miR-16	NFATC3
hsa-miR-107	ITPR1					DYRK1A	hsa-miR-145		PPP3R1	hsa-miR-342-3p		hsa-miR-6876-5p	NFATC2		hsa-miR-17-3p	NFATC3
hsa-miR-107	ITPR1					DYRK1A	hsa-miR-487a		PPP3R1	hsa-miR-4516		hsa-miR-330-5p	NFATC2		hsa-miR-17-3p	NFATC3
hsa-miR-107	ITPR1					DYRK1A	hsa-miR-211		PPP3R1	hsa-miR-7-1-3p		hsa-miR-326	NFATC2		hsa-miR-17-3p	NFATC3
hsa-miR-146b-5p	ITPR1					DYRK1A	hsa-miR-520g		PPP3R1	hsa-miR-194-5p		hsa-miR-4768-5p	NFATC2		hsa-miR-181c	NFATC3
hsa-miR-4295	ITPR1					DYRK1A	hsa-miR-204		PPP3R1	hsa-miR-101-3p		hsa-miR-320d	NFATC2		hsa-miR-181c	NFATC3
hsa-miR-4295	ITPR1					DYRK1A	hsa-miR-520h		PPP3R1	hsa-miR-302d-3p		hsa-miR-6833-3p	NFATC2		hsa-miR-183	NFATC3
hsa-miR-4295	ITPR1					DYRK1A	hsa-miR-513-5p		PPP3R1	hsa-miR-141-3p		hsa-miR-320c	NFATC2		hsa-miR-183	NFATC3
						DYRK1A	hsa-miR-374a		PPP3R1	hsa-miR-200a-3p		hsa-miR-320a	NFATC2		hsa-miR-185	NFATC3
hsa-miR-200a-3p	MAP3K7					DYRK1A	hsa-miR-485-3p		PPP3R1	hsa-miR-1270		hsa-miR-4429	NFATC2		hsa-miR-185	NFATC3
hsa-miR-30e-5p	MAP3K7					DYRK1A	hsa-miR-587		PPP3R1	hsa-miR-941		hsa-miR-663b	NFATC2		hsa-miR-185	NFATC3
hsa-miR-30c-5p	MAP3K7					DYRK1A	hsa-miR-137		PPP3R1	hsa-miR-181a-2-3p		hsa-miR-320b	NFATC2		hsa-miR-18a*	NFATC3
hsa-miR-101-3p	MAP3K7					DYRK1A	hsa-miR-498		PPP3R1	hsa-miR-142-5p		hsa-miR-6823-5p	NFATC2		hsa-miR-18a*	NFATC3
hsa-miR-137	MAP3K7					DYRK1A	hsa-miR-30a		PPP3R1	hsa-miR-34a-5p		hsa-miR-1237-3p	NFATC2		hsa-miR-193b	NFATC3
hsa-miR-488-3p	MAP3K7					DYRK1A	hsa-miR-30d		PPP3R1	hsa-miR-429		hsa-miR-7847-3p	NFATC2		hsa-miR-193b	NFATC3
hsa-miR-181b-5p	MAP3K7					DYRK1A	hsa-miR-30e		PPP3R1	hsa-miR-3681-5p		hsa-miR-4650-3p	NFATC2		hsa-miR-195	NFATC3
hsa-miR-107	MAP3K7					DYRK1A	hsa-miR-30b		PPP3R1	hsa-miR-26a-5p		hsa-miR-6888-3p	NFATC2		hsa-miR-195	NFATC3
hsa-miR-302e	MAP3K7					DYRK1A	hsa-miR-30c		PPP3R1	hsa-miR-142-3p		hsa-miR-3175	NFATC2		hsa-miR-195	NFATC3
hsa-miR-129-5p	MAP3K7					DYRK1A	hsa-miR-548a-3p		PPP3R1	hsa-miR-26b-5p		hsa-miR-3123	NFATC2		hsa-miR-197	NFATC3
hsa-miR-129-5p	MAP3K7					DYRK1A	hsa-miR-20a		PPP3R1	hsa-miR-3127-3p		hsa-miR-3664-3p	NFATC2		hsa-miR-198	NFATC3
hsa-miR-141-3p	MAP3K7					DYRK1A	hsa-miR-106b		PPP3R1	hsa-miR-378a-3p		hsa-miR-613	NFATC2		hsa-miR-198	NFATC3
hsa-miR-196a-5p	MAP3K7					DYRK1A	hsa-miR-154		PPP3R1	hsa-miR-374a-5p		hsa-miR-552-3p	NFATC2		hsa-miR-199a	NFATC3
hsa-miR-16-5p	MAP3K7					DYRK1A	hsa-miR-27b		PPP3R1	hsa-miR-1207-5p		hsa-miR-1-3p	NFATC2		hsa-miR-199a	NFATC3
hsa-miR-16-5p	MAP3K7					DYRK1A	hsa-miR-27a		PPP3R1	hsa-miR-103a-2-5p		hsa-miR-206	NFATC2		hsa-miR-20b	NFATC3
hsa-miR-15a-5p	MAP3K7					DYRK1A	hsa-miR-452		PPP3R1	hsa-miR-626		hsa-miR-605-3p	NFATC2		hsa-miR-22	NFATC3
hsa-miR-15a-5p	MAP3K7					DYRK1A	hsa-miR-646		PPP3R1	hsa-miR-4999-5p		hsa-miR-371b-3p	NFATC2		hsa-miR-22	NFATC3
hsa-miR-17-5p	MAP3K7					DYRK1A	hsa-miR-301a		PPP3R1	hsa-miR-19b-3p		hsa-miR-4463	NFATC2		hsa-miR-221	NFATC3
hsa-miR-17-5p	MAP3K7					DYRK1A	hsa-miR-194		PPP3R1	hsa-miR-19a-3p		hsa-miR-133a-3p	NFATC2		hsa-miR-221	NFATC3
hsa-miR-20a-5p	MAP3K7					DYRK1A	hsa-miR-130a		PPP3R1	hsa-miR-7-5p		hsa-miR-6834-5p	NFATC2		hsa-miR-222	NFATC3
						DYRK1A	hsa-miR-130b		PPP3R1	hsa-miR-23a-3p		hsa-miR-133b	NFATC2		hsa-miR-222	NFATC3
hsa-miR-181b-5p	TAB1					DYRK1A	hsa-miR-636		PPP3R1	hsa-miR-766-3p		hsa-miR-596	NFATC2		hsa-miR-296	NFATC3
hsa-miR-181a-5p	TAB1					DYRK1A	hsa-miR-503		PPP3R1	hsa-miR-424-3p		hsa-miR-26b-3p	NFATC2		hsa-miR-296	NFATC3
hsa-miR-29c-3p	TAB1					DYRK1A	hsa-miR-301b		PPP3R1	hsa-miR-450b-5p		hsa-miR-3661	NFATC2		hsa-miR-29a	NFATC3
hsa-miR-29b-3p	TAB1					DYRK1A	hsa-miR-217		PPP3R1	hsa-miR-15b-5p		hsa-miR-631	NFATC2		hsa-miR-29a	NFATC3
hsa-miR-18a-5p	TAB1								PPP3R1	hsa-miR-16-5p		hsa-miR-4424	NFATC2		hsa-miR-29b	NFATC3
hsa-miR-342-3p	TAB1					ITPR1	hsa-miR-32		PPP3R1	hsa-miR-15a-5p		hsa-miR-3978	NFATC2		hsa-miR-29b	NFATC3
hsa-miR-432-5p	TAB1					ITPR1	hsa-miR-92b		PPP3R1	hsa-miR-34b-3p		hsa-miR-4668-5p	NFATC2		hsa-miR-29c	NFATC3
hsa-miR-432-5p	TAB1					ITPR1	hsa-miR-96		PPP3R1	hsa-miR-30a-5p		hsa-miR-6840-3p	NFATC2		hsa-miR-29c	NFATC3
hsa-miR-299-3p	TAB1					ITPR1	hsa-miR-92a		PPP3R1	hsa-miR-30a-5p		hsa-miR-2117	NFATC2		hsa-miR-320	NFATC3
hsa-miR-134-5p	TAB1					ITPR1	hsa-miR-19b		PPP3R1	hsa-miR-139-3p		hsa-miR-8066	NFATC2		hsa-miR-320	NFATC3
hsa-miR-485-3p	TAB1					ITPR1	hsa-miR-19a		PPP3R1	hsa-miR-193a-5p		hsa-miR-3124-3p	NFATC2		hsa-miR-324-3p	NFATC3
hsa-miR-10a-5p	TAB1					ITPR1	hsa-miR-182		PPP3R1	hsa-miR-423-5p		hsa-miR-4318	NFATC2		hsa-miR-324-3p	NFATC3
hsa-miR-142-3p	TAB1					ITPR1	hsa-miR-153		PPP3R1	hsa-miR-301b		hsa-miR-4531	NFATC2		hsa-miR-326	NFATC3
hsa-miR-519e-5p	TAB1					ITPR1	hsa-miR-144		PPP3R1	hsa-miR-3928		hsa-miR-4639-5p	NFATC2		hsa-miR-326	NFATC3
hsa-miR-10b-5p	TAB1					ITPR1	hsa-miR-448		PPP3R1	hsa-miR-5682		hsa-miR-7-5p	NFATC2		hsa-miR-328	NFATC3
hsa-miR-29a-3p	TAB1					ITPR1	hsa-miR-454		PPP3R1	hsa-miR-17-5p		hsa-miR-4656	NFATC2		hsa-miR-328	NFATC3
hsa-miR-151a-3p	TAB1					ITPR1	hsa-miR-519b-3p		PPP3R1	hsa-miR-31-5p		hsa-miR-4729	NFATC2		hsa-miR-329	NFATC3
hsa-miR-362-5p	TAB1					ITPR1	hsa-miR-519c-3p		PPP3R1	hsa-miR-33a-5p		hsa-miR-3192-5p	NFATC2		hsa-miR-329	NFATC3
hsa-miR-18b-5p	TAB1					ITPR1	hsa-miR-519a		PPP3R1	hsa-miR-93-5p		hsa-miR-620	NFATC2		hsa-miR-330	NFATC3
hsa-miR-504-5p	TAB1					ITPR1	hsa-miR-200c		PPP3R1	hsa-miR-181a-5p		hsa-miR-3607-3p	NFATC2		hsa-miR-330	NFATC3
						ITPR1	hsa-miR-200b		PPP3R1	hsa-miR-181c-5p		hsa-miR-1270	NFATC2		hsa-miR-331	NFATC3
hsa-miR-200b-3p	TAB2					ITPR1	hsa-miR-301a		PPP3R1	hsa-miR-218-5p		hsa-miR-6845-3p	NFATC2		hsa-miR-331	NFATC3
hsa-miR-200a-3p	TAB2					ITPR1	hsa-miR-424		PPP3R1	hsa-miR-130a-3p		hsa-miR-9-5p	NFATC2		hsa-miR-339	NFATC3
hsa-miR-429	TAB2					ITPR1	hsa-miR-340		PPP3R1	hsa-miR-301a-3p		hsa-miR-1296-3p	NFATC2		hsa-miR-339	NFATC3
hsa-miR-429	TAB2					ITPR1	hsa-miR-130a		PPP3R1	hsa-miR-99b-5p		hsa-miR-4763-3p	NFATC2		hsa-miR-342	NFATC3
hsa-miR-34a-5p	TAB2					ITPR1	hsa-miR-130b		PPP3R1	hsa-miR-130b-3p		hsa-miR-551b-5p	NFATC2		hsa-miR-342	NFATC3
hsa-miR-30e-5p	TAB2					ITPR1	hsa-miR-301b		PPP3R1	hsa-miR-20b-5p		hsa-miR-3689b-3p	NFATC2		hsa-miR-345	NFATC3
hsa-miR-30e-3p	TAB2					ITPR1	hsa-miR-25		PPP3R1	hsa-miR-193b-3p		hsa-miR-3140-3p	NFATC2		hsa-miR-346	NFATC3
hsa-miR-30c-5p	TAB2					ITPR1	hsa-miR-107		PPP3R1	hsa-miR-455-5p		hsa-miR-6779-5p	NFATC2		hsa-miR-34b	NFATC3
hsa-miR-101-3p	TAB2					ITPR1	hsa-miR-429		PPP3R1	hsa-miR-561-3p		hsa-miR-7160-5p	NFATC2		hsa-miR-34b	NFATC3
hsa-miR-101-3p	TAB2					ITPR1	hsa-miR-103		PPP3R1	hsa-miR-625-5p		hsa-miR-6857-3p	NFATC2		hsa-miR-361	NFATC3
hsa-miR-101-3p	TAB2					ITPR1	hsa-miR-497		PPP3R1	hsa-miR-33b-5p		hsa-miR-30b-3p	NFATC2		hsa-miR-361	NFATC3
hsa-miR-101-3p	TAB2								PPP3R1	hsa-let-7i-3p		hsa-miR-134-3p	NFATC2		hsa-miR-363*	NFATC3
hsa-miR-186-5p	TAB2					MAP3K7	hsa-miR-320		PPP3R1	hsa-miR-625-3p		hsa-miR-6780a-5p	NFATC2		hsa-miR-363*	NFATC3
hsa-miR-137	TAB2								PPP3R1	hsa-miR-873-5p		hsa-miR-3689a-3p	NFATC2		hsa-miR-370	NFATC3
hsa-miR-320b	TAB2					CSNK1A1	hsa-miR-9		PPP3R1	hsa-miR-522-5p		hsa-miR-4803	NFATC2		hsa-miR-370	NFATC3
hsa-miR-92b-3p	TAB2					CSNK1A1	hsa-miR-30b		PPP3R1	hsa-miR-339-5p		hsa-miR-3689c	NFATC2		hsa-miR-370	NFATC3
hsa-miR-199a-5p	TAB2					CSNK1A1	hsa-miR-30a		PPP3R1	hsa-miR-671-5p		hsa-miR-1273h-5p	NFATC2		hsa-miR-370	NFATC3
hsa-miR-488-3p	TAB2					CSNK1A1	hsa-miR-30d		PPP3R2	hsa-miR-532-3p		hsa-miR-302e	NFATC2		hsa-miR-378	NFATC3
hsa-miR-181b-5p	TAB2					CSNK1A1	hsa-miR-30e		PPP3R2	hsa-miR-141-5p		hsa-miR-1205	NFATC2		hsa-miR-378	NFATC3
hsa-miR-181b-5p	TAB2					CSNK1A1	hsa-miR-30c		PPP3R2	hsa-miR-335-5p		hsa-miR-24-3p	NFATC2		hsa-miR-381	NFATC3
						CSNK1A1	hsa-miR-495		RCAN1	hsa-miR-124-3p		hsa-miR-31-3p	NFATC2		hsa-miR-381	NFATC3
hsa-miR-200b-3p	CSNK1A1					CSNK1A1	hsa-miR-569		RCAN1	hsa-miR-92a-3p		hsa-miR-4644	NFATC2		hsa-miR-382	NFATC3
hsa-miR-429	CSNK1A1					CSNK1A1	hsa-miR-155		RCAN1	hsa-miR-124-3p		hsa-miR-6754-5p	NFATC2		hsa-miR-409-5p	NFATC3
hsa-miR-30e-5p	CSNK1A1					CSNK1A1	hsa-miR-107		RCAN1	hsa-miR-335-5p		hsa-miR-4270	NFATC2		hsa-miR-409-5p	NFATC3
hsa-miR-30c-5p	CSNK1A1					CSNK1A1	hsa-miR-103		RCAN1	hsa-miR-107		hsa-miR-129-2-3p	NFATC2		hsa-miR-422a	NFATC3
hsa-miR-186-5p	CSNK1A1								RCAN1	hsa-miR-324-5p		hsa-miR-129-1-3p	NFATC2		hsa-miR-424	NFATC3
hsa-miR-186-5p	CSNK1A1					LRRK2	hsa-miR-181c		RCAN1	hsa-miR-512-3p		hsa-miR-125a-3p	NFATC2		hsa-miR-424	NFATC3
hsa-miR-186-5p	CSNK1A1					LRRK2	hsa-miR-181a		RCAN1	hsa-miR-421		hsa-miR-185-5p	NFATC2		hsa-miR-425-3p	NFATC3
hsa-miR-186-5p	CSNK1A1					LRRK2	hsa-miR-410		RCAN1	hsa-miR-769-3p		hsa-miR-218-5p	NFATC2		hsa-miR-425-3p	NFATC3
hsa-miR-186-5p	CSNK1A1					LRRK2	hsa-miR-19b		RCAN1	hsa-miR-34c-3p		hsa-miR-433-3p	NFATC2		hsa-miR-449	NFATC3
hsa-miR-186-5p	CSNK1A1					LRRK2	hsa-miR-19a		RCAN1	hsa-miR-491-3p		hsa-miR-520a-5p	NFATC2		hsa-miR-449	NFATC3
hsa-miR-186-5p	CSNK1A1					LRRK2	hsa-miR-454		RCAN1	hsa-miR-532-3p		hsa-miR-584-3p	NFATC2		hsa-miR-449b	NFATC3
hsa-miR-186-5p	CSNK1A1					LRRK2	hsa-miR-205		RCAN1	hsa-miR-518a-5p		hsa-miR-525-5p	NFATC2		hsa-miR-449b	NFATC3
hsa-miR-135b-5p	CSNK1A1					LRRK2	hsa-miR-181b		RCAN1	hsa-miR-17-5p					hsa-miR-483	NFATC3
hsa-miR-346	CSNK1A1					LRRK2	hsa-miR-181d		RCAN1	hsa-miR-20a-5p		hsa-miR-4306	NFATC3		hsa-miR-483	NFATC3
hsa-miR-107	CSNK1A1								RCAN1	hsa-miR-27a-3p		hsa-miR-4282	NFATC3		hsa-miR-483	NFATC3
hsa-miR-107	CSNK1A1					STIM1	hsa-miR-424		RCAN1	hsa-miR-93-5p		hsa-miR-4296	NFATC3		hsa-miR-483	NFATC3
hsa-miR-202-3p	CSNK1A1					STIM1	hsa-miR-497		RCAN1	hsa-miR-103a-3p		hsa-miR-3065-3p	NFATC3		hsa-miR-484	NFATC3
hsa-miR-129-5p	CSNK1A1					STIM1	hsa-miR-939		RCAN1	hsa-miR-106a-5p		hsa-miR-340-5p	NFATC3		hsa-miR-484	NFATC3
hsa-miR-139-5p	CSNK1A1					STIM1	hsa-miR-920		RCAN1	hsa-miR-34a-5p		hsa-miR-4644	NFATC3		hsa-miR-490	NFATC3
hsa-miR-34c-5p	CSNK1A1					STIM1	hsa-miR-940		RCAN1	hsa-miR-27b-3p		hsa-miR-185-5p	NFATC3		hsa-miR-490	NFATC3
									RCAN1	hsa-miR-128		hsa-miR-524-5p	NFATC3		hsa-miR-491	NFATC3
hsa-miR-18a-5p	LRRK2					ORAI1	hsa-miR-519c-3p		RCAN1	hsa-miR-145-5p		hsa-miR-520d-5p	NFATC3		hsa-miR-491	NFATC3
hsa-miR-382-5p	LRRK2					ORAI1	hsa-miR-519b-3p		RCAN1	hsa-miR-106b-5p		hsa-miR-518c-5p	NFATC3		hsa-miR-492	NFATC3
hsa-miR-33a-5p	LRRK2					ORAI1	hsa-miR-519a		RCAN1	hsa-miR-361-5p		hsa-miR-1537-5p	NFATC3		hsa-miR-492	NFATC3
hsa-miR-18b-5p	LRRK2					ORAI1	hsa-miR-20b		RCAN1	hsa-miR-330-3p		hsa-miR-6796-3p	NFATC3		hsa-miR-493-3p	NFATC3
						ORAI1	hsa-miR-93		RCAN1	hsa-miR-20b-5p		hsa-miR-3140-5p	NFATC3		hsa-miR-493-3p	NFATC3
hsa-miR-429	AKAP5					ORAI1	hsa-miR-17		RCAN1	hsa-miR-490-3p		hsa-miR-337-3p	NFATC3		hsa-miR-497	NFATC3
hsa-miR-186-5p	AKAP5					ORAI1	hsa-miR-520b		RCAN1	hsa-miR-532-5p		hsa-miR-4649-3p	NFATC3		hsa-miR-497	NFATC3
hsa-miR-186-5p	AKAP5					ORAI1	hsa-miR-520c-3p		RCAN1	hsa-miR-561-3p		hsa-miR-6871-3p	NFATC3		hsa-miR-497	NFATC3
hsa-miR-197-3p	AKAP5					ORAI1	hsa-miR-372		RCAN1	hsa-miR-589-3p		hsa-miR-4265	NFATC3		hsa-miR-500	NFATC3
hsa-miR-92b-3p	AKAP5					ORAI1	hsa-miR-520d-3p		RCAN1	hsa-let-7d-3p		hsa-miR-4322	NFATC3		hsa-miR-500	NFATC3
hsa-miR-29c-3p	AKAP5					ORAI1	hsa-miR-520e		RCAN1	hsa-miR-26a-1-3p		hsa-miR-329-5p	NFATC3		hsa-miR-502	NFATC3
hsa-miR-29b-3p	AKAP5					ORAI1	hsa-miR-520a-3p		RCAN1	hsa-miR-221-5p		hsa-miR-4417	NFATC3		hsa-miR-502	NFATC3
hsa-miR-29b-3p	AKAP5								RCAN1	hsa-miR-26a-2-3p		hsa-miR-1208	NFATC3		hsa-miR-503	NFATC3
hsa-miR-302e	AKAP5								RCAN1	hsa-miR-495		hsa-miR-6775-3p	NFATC3		hsa-miR-503	NFATC3
hsa-miR-129-5p	AKAP5								RCAN1	hsa-miR-527		hsa-miR-1291	NFATC3		hsa-miR-506	NFATC3
hsa-miR-17-5p	AKAP5								RCAN1	hsa-miR-342-3p		hsa-miR-383-3p	NFATC3		hsa-miR-506	NFATC3
hsa-miR-20a-5p	AKAP5								RCAN1	hsa-miR-335-5p		hsa-miR-4267	NFATC3		hsa-miR-510	NFATC3
hsa-miR-92a-3p	AKAP5								RCAN1	hsa-miR-335-5p		hsa-miR-3922-3p	NFATC3		hsa-miR-510	NFATC3
hsa-miR-136-5p	AKAP5								RCAN1	hsa-miR-335-5p		hsa-miR-4423-3p	NFATC3		hsa-miR-510	NFATC3
hsa-miR-544a	AKAP5								RCAN1	hsa-miR-335-5p		hsa-miR-3176	NFATC3		hsa-miR-516-5p	NFATC3
hsa-miR-544a	AKAP5								RCAN1	hsa-miR-335-5p		hsa-miR-6814-5p	NFATC3		hsa-miR-516-5p	NFATC3
hsa-miR-544a	AKAP5								RCAN1	hsa-miR-34a-5p		hsa-miR-1-3p	NFATC3		hsa-miR-518b	NFATC3
hsa-miR-382-5p	AKAP5								RCAN1	hsa-miR-335-5p		hsa-miR-613	NFATC3		hsa-miR-518b	NFATC3
hsa-miR-454-3p	AKAP5								RCAN1	hsa-miR-522-5p		hsa-miR-6736-3p	NFATC3		hsa-miR-518c	NFATC3
hsa-miR-520e	AKAP5								GSK3B	hsa-miR-26a-5p		hsa-miR-16-5p	NFATC3		hsa-miR-518c	NFATC3
									GSK3B	hsa-miR-26b-5p		hsa-miR-15a-5p	NFATC3		hsa-miR-518c*	NFATC3
hsa-miR-429	CALM1								GSK3B	hsa-miR-101-3p		hsa-miR-6838-5p	NFATC3		hsa-miR-518c*	NFATC3
hsa-miR-34a-5p	CALM1								GSK3B	hsa-miR-450b-5p		hsa-miR-206	NFATC3		hsa-miR-518e	NFATC3
hsa-miR-761	CALM1								GSK3B	hsa-miR-129-5p		hsa-miR-218-5p	NFATC3		hsa-miR-518e	NFATC3
hsa-miR-761	CALM1								GSK3B	hsa-miR-624-3p		hsa-miR-424-5p	NFATC3		hsa-miR-518f	NFATC3
hsa-miR-761	CALM1								GSK3B	hsa-miR-590-3p		hsa-miR-195-5p	NFATC3		hsa-miR-519d	NFATC3
hsa-miR-186-5p	CALM1								GSK3B	hsa-miR-27b-3p		hsa-miR-497-5p	NFATC3		hsa-miR-519d	NFATC3
hsa-miR-137	CALM1								GSK3B	hsa-let-7b-3p		hsa-miR-15b-5p	NFATC3		hsa-miR-520a*	NFATC3
hsa-miR-214-3p	CALM1								GSK3B	hsa-miR-27a-3p		hsa-miR-654-5p	NFATC3		hsa-miR-520a*	NFATC3
hsa-miR-214-3p	CALM1								GSK3B	hsa-miR-128		hsa-miR-9-5p	NFATC3		hsa-miR-520d	NFATC3
hsa-miR-214-3p	CALM1								GSK3B	hsa-miR-624-5p		hsa-miR-4251	NFATC3		hsa-miR-520d	NFATC3
hsa-miR-214-3p	CALM1								GSK3B	hsa-miR-424-5p		hsa-miR-541-3p	NFATC3		hsa-miR-520d*	NFATC3
hsa-miR-199a-3p	CALM1								GSK3B	hsa-miR-603		hsa-miR-6885-3p	NFATC3		hsa-miR-520d*	NFATC3
hsa-miR-488-3p	CALM1								GSK3B	hsa-let-7f-2-3p		hsa-miR-7847-3p	NFATC3		hsa-miR-520g	NFATC3
hsa-miR-488-3p	CALM1								GSK3B	hsa-miR-582-3p		hsa-miR-548l	NFATC3		hsa-miR-520g	NFATC3
hsa-miR-488-3p	CALM1								GSK3B	hsa-miR-99b-3p		hsa-miR-544b	NFATC3		hsa-miR-520h	NFATC3
hsa-miR-488-3p	CALM1								GSK3B	hsa-miR-30b-3p		hsa-miR-583	NFATC3		hsa-miR-520h	NFATC3
hsa-miR-488-3p	CALM1								GSK3B	hsa-let-7g-3p		hsa-miR-31-5p	NFATC3		hsa-miR-524	NFATC3
hsa-miR-488-3p	CALM1								GSK3B	hsa-miR-155-5p		hsa-miR-6743-5p	NFATC3		hsa-miR-524	NFATC3
hsa-miR-488-3p	CALM1								GSK3B	hsa-miR-99a-3p		hsa-miR-4688	NFATC3		hsa-miR-525	NFATC3
hsa-miR-181b-5p	CALM1								GSK3B	hsa-miR-224-5p		hsa-miR-4299	NFATC3		hsa-miR-525	NFATC3
									GSK3B	hsa-miR-138-2-3p		hsa-miR-6128	NFATC3		hsa-miR-525*	NFATC3
hsa-miR-197-3p	STIM1								GSK3B	hsa-miR-29a-5p		hsa-miR-30b-5p	NFATC3		hsa-miR-525*	NFATC3
hsa-miR-16-5p	STIM1								GSK3B	hsa-miR-24-3p		hsa-miR-30a-5p	NFATC3		hsa-miR-526b	NFATC3
hsa-miR-15a-5p	STIM1								GSK3B	hsa-miR-3685		hsa-miR-579-3p	NFATC3		hsa-miR-526b	NFATC3
hsa-miR-4306	STIM1								GSK3B	hsa-miR-148a-5p		hsa-miR-153-3p	NFATC3		hsa-miR-526c	NFATC3
hsa-miR-4306	STIM1								GSK3B	hsa-miR-335-3p		hsa-miR-30c-5p	NFATC3		hsa-miR-526c	NFATC3
hsa-miR-4306	STIM1								GSK3B	hsa-miR-32-5p		hsa-miR-30d-5p	NFATC3		hsa-miR-527	NFATC3
hsa-miR-4306	STIM1								GSK3B	hsa-miR-107		hsa-miR-664b-3p	NFATC3		hsa-miR-527	NFATC3
hsa-miR-4306	STIM1								GSK3B	hsa-miR-103a-3p		hsa-miR-30e-5p	NFATC3		hsa-miR-550	NFATC3
hsa-miR-184	STIM1								GSK3B	hsa-miR-203		hsa-miR-1266-3p	NFATC3		hsa-miR-550	NFATC3
hsa-miR-195-5p	STIM1								GSK3B	hsa-miR-877-3p		hsa-miR-2116-3p	NFATC3		hsa-miR-551a	NFATC3
hsa-miR-497-5p	STIM1								GSK3B	hsa-miR-2110		hsa-miR-548e-5p	NFATC3		hsa-miR-551b	NFATC3
hsa-miR-124-3p	STIM1								GSK3B	hsa-miR-126-5p		hsa-miR-4782-5p	NFATC3		hsa-miR-551b	NFATC3
hsa-miR-185-5p	STIM1								GSK3B	hsa-miR-204-5p		hsa-miR-5706	NFATC3		hsa-miR-554	NFATC3
hsa-miR-15b-5p	STIM1								GSK3B	hsa-miR-876-5p		hsa-miR-370-5p	NFATC3		hsa-miR-554	NFATC3
hsa-miR-4458	STIM1								GSK3B	hsa-miR-25-3p		hsa-miR-605-3p	NFATC3		hsa-miR-558	NFATC3
hsa-miR-4458	STIM1								GSK3B	hsa-miR-185-5p		hsa-miR-33a-3p	NFATC3		hsa-miR-558	NFATC3
hsa-miR-4458	STIM1								GSK3B	hsa-miR-625-3p		hsa-miR-621	NFATC3		hsa-miR-561	NFATC3
hsa-miR-874-3p	STIM1								GSK3B	hsa-miR-502-3p		hsa-miR-4436a	NFATC3		hsa-miR-561	NFATC3
hsa-miR-335-5p	STIM1								GSK3B	hsa-miR-501-3p		hsa-miR-3188	NFATC3		hsa-miR-566	NFATC3
hsa-miR-490-3p	STIM1								GSK3B	hsa-miR-342-3p		hsa-miR-5000-3p	NFATC3		hsa-miR-566	NFATC3
									GSK3B	hsa-miR-766-3p		hsa-miR-6878-3p	NFATC3		hsa-miR-571	NFATC3
hsa-miR-181b-5p	ORAI1								GSK3B	hsa-miR-532-3p		hsa-miR-6838-3p	NFATC3		hsa-miR-571	NFATC3
hsa-miR-181a-5p	ORAI1								GSK3B	hsa-miR-181b-5p		hsa-miR-4422	NFATC3		hsa-miR-571	NFATC3
hsa-miR-130a-3p	ORAI1								GSK3B	hsa-miR-17-5p		hsa-miR-1299	NFATC3		hsa-miR-572	NFATC3
hsa-miR-492	ORAI1								GSK3B	hsa-miR-125b-2-3p		hsa-miR-204-5p	NFATC3		hsa-miR-574	NFATC3
hsa-miR-17-5p	ORAI1								GSK3B	hsa-miR-935		hsa-miR-1264	NFATC3		hsa-miR-574	NFATC3
hsa-miR-20a-5p	ORAI1								GSK3B	hsa-miR-331-3p		hsa-miR-211-5p	NFATC3		hsa-miR-588	NFATC3
hsa-miR-432-5p	ORAI1								GSK3B	hsa-miR-101-5p		hsa-miR-4641	NFATC3		hsa-miR-588	NFATC3
hsa-miR-377-3p	ORAI1								GSK3B	hsa-miR-874		hsa-miR-512-3p	NFATC3		hsa-miR-596	NFATC3
hsa-miR-422a	ORAI1								GSK3B	hsa-miR-130b-5p		hsa-miR-4457	NFATC3		hsa-miR-596	NFATC3
hsa-miR-7-5p	ORAI1								GSK3B	hsa-miR-212-3p		hsa-miR-6879-5p	NFATC3		hsa-miR-596	NFATC3
hsa-miR-152-3p	ORAI1								GSK3B	hsa-miR-424-3p		hsa-miR-6735-5p	NFATC3		hsa-miR-596	NFATC3
hsa-miR-454-3p	ORAI1								GSK3B	hsa-miR-140-5p		hsa-miR-6071	NFATC3		hsa-miR-596	NFATC3
hsa-miR-181c-5p	ORAI1								GSK3B	hsa-miR-132-3p		hsa-miR-8071	NFATC3		hsa-miR-601	NFATC3
hsa-miR-181d-5p	ORAI1								GSK3B	hsa-miR-1303		hsa-miR-511-5p	NFATC3		hsa-miR-602	NFATC3
hsa-miR-520f-3p	ORAI1								GSK3B	hsa-miR-452-5p		hsa-miR-7843-5p	NFATC3		hsa-miR-602	NFATC3
hsa-miR-526b-3p	ORAI1								GSK3B	hsa-miR-362-5p		hsa-miR-4632-5p	NFATC3		hsa-miR-604	NFATC3
hsa-miR-520b	ORAI1								GSK3B	hsa-miR-374a-5p		hsa-miR-4436b-3p	NFATC3		hsa-miR-604	NFATC3
hsa-miR-520c-3p	ORAI1								GSK3B	hsa-miR-22-3p		hsa-miR-6878-5p	NFATC3		hsa-miR-605	NFATC3
hsa-miR-519d-3p	ORAI1								GSK3B	hsa-miR-29c-3p		hsa-miR-1289	NFATC3		hsa-miR-605	NFATC3
hsa-miR-520d-3p	ORAI1								GSK3B	hsa-miR-29a-3p		hsa-miR-3591-3p	NFATC3		hsa-miR-614	NFATC3
									GSK3B	hsa-miR-188-3p		hsa-miR-3910	NFATC3		hsa-miR-614	NFATC3
									GSK3B	hsa-let-7d-3p		hsa-miR-31-3p	NFATC3		hsa-miR-615	NFATC3
									GSK3B	hsa-miR-3934		hsa-miR-514a-5p	NFATC3		hsa-miR-615	NFATC3
									GSK3B	hsa-miR-29b-3p		hsa-miR-3162-5p	NFATC3		hsa-miR-619	NFATC3
									GSK3B	hsa-miR-500a-3p		hsa-miR-21-3p	NFATC3		hsa-miR-619	NFATC3
									GSK3B	hsa-miR-19b-3p		hsa-miR-6866-5p	NFATC3		hsa-miR-622	NFATC3
									GSK3B	hsa-miR-19a-3p		hsa-miR-4676-5p	NFATC3		hsa-miR-625	NFATC3
									GSK3B	hsa-miR-186-3p		hsa-miR-575	NFATC3		hsa-miR-625	NFATC3
									GSK3B	hsa-miR-490-5p		hsa-miR-548j-3p	NFATC3		hsa-miR-629	NFATC3
									GSK3B	hsa-miR-339-5p		hsa-miR-548ae-3p	NFATC3		hsa-miR-631	NFATC3
									GSK3B	hsa-miR-374b-3p		hsa-miR-548aq-3p	NFATC3		hsa-miR-631	NFATC3
									GSK3B	hsa-miR-483-3p		hsa-miR-548aj-3p	NFATC3		hsa-miR-632	NFATC3
									GSK3B	hsa-miR-939		hsa-miR-548x-3p	NFATC3		hsa-miR-632	NFATC3
									GSK3B	hsa-miR-4745-5p		hsa-miR-548am-3p	NFATC3		hsa-miR-634	NFATC3
									GSK3B	hsa-miR-500a-5p		hsa-miR-548ah-3p	NFATC3		hsa-miR-636	NFATC3
									GSK3B	hsa-miR-589-5p		hsa-miR-3191-5p	NFATC3		hsa-miR-636	NFATC3
									GSK3B	hsa-miR-146b-5p		hsa-miR-6772-3p	NFATC3		hsa-miR-637	NFATC3
									GSK3B	hsa-miR-129-2-3p		hsa-miR-3607-3p	NFATC3		hsa-miR-637	NFATC3
									GSK3B	hsa-miR-146a-5p		hsa-miR-4678	NFATC3		hsa-miR-638	NFATC3
									GSK3B	hsa-miR-491-5p		hsa-miR-6872-3p	NFATC3		hsa-miR-638	NFATC3
									GSK3B	hsa-miR-411-3p		hsa-miR-4764-5p	NFATC3		hsa-miR-639	NFATC3
									GSK3B	hsa-miR-769-5p		hsa-miR-1283	NFATC3		hsa-miR-639	NFATC3
									GSK3B	hsa-miR-627		hsa-miR-1305	NFATC3		hsa-miR-640	NFATC3
									GSK3B	hsa-miR-1180		hsa-miR-4700-5p	NFATC3		hsa-miR-640	NFATC3
									GSK3B	hsa-miR-212-5p		hsa-miR-8089	NFATC3		hsa-miR-642	NFATC3
									GSK3B	hsa-miR-182-5p		hsa-miR-6805-3p	NFATC3		hsa-miR-646	NFATC3
									GSK3B	hsa-miR-130a-3p		hsa-miR-5691	NFATC3		hsa-miR-646	NFATC3
									GSK3B	hsa-miR-130b-3p		hsa-miR-4667-5p	NFATC3		hsa-miR-647	NFATC3
									GSK3B	hsa-miR-550a-3p		hsa-miR-29b-3p	NFATC3		hsa-miR-647	NFATC3
									GSK3B	hsa-miR-629-3p		hsa-miR-29c-3p	NFATC3		hsa-miR-652	NFATC3
									GSK3B	hsa-miR-122-3p		hsa-miR-29a-3p	NFATC3		hsa-miR-652	NFATC3
									GSK3B	hsa-miR-324-3p		hsa-miR-670-3p	NFATC3		hsa-miR-654	NFATC3
									GSK3B	hsa-miR-615-3p		hsa-miR-4731-3p	NFATC3		hsa-miR-654	NFATC3
									GSK3B	hsa-miR-145-5p		hsa-miR-3616-3p	NFATC3		hsa-miR-658	NFATC3
									GSK3B	hsa-miR-155-5p		hsa-miR-4801	NFATC3		hsa-miR-661	NFATC3
									DYRK1A	hsa-miR-142-3p		hsa-miR-3714	NFATC3		hsa-miR-661	NFATC3
									DYRK1A	hsa-miR-324-5p		hsa-miR-596	NFATC3		hsa-miR-662	NFATC3
									DYRK1A	hsa-miR-503		hsa-miR-302e	NFATC3		hsa-miR-662	NFATC3
									DYRK1A	hsa-miR-588		hsa-miR-4297	NFATC3		hsa-miR-671	NFATC3
									DYRK1A	hsa-miR-139-3p		hsa-miR-556-5p	NFATC3		hsa-miR-671	NFATC3
									DYRK1A	hsa-miR-361-3p		hsa-miR-1226-5p	NFATC3		hsa-miR-675	NFATC3
									DYRK1A	hsa-miR-338-5p		hsa-miR-1914-3p	NFATC3		hsa-miR-675	NFATC3
									DYRK1A	hsa-miR-590-3p		hsa-miR-222-3p	NFATC3		hsa-miR-765	NFATC3
									DYRK1A	hsa-miR-450b-5p		hsa-miR-6738-5p	NFATC3		hsa-miR-765	NFATC3
									DYRK1A	hsa-miR-876-5p		hsa-miR-141-5p	NFATC3		hsa-miR-766	NFATC3
									DYRK1A	hsa-miR-760		hsa-miR-4793-3p	NFATC3		hsa-miR-766	NFATC3
									DYRK1A	hsa-miR-922		hsa-miR-5194	NFATC3		hsa-miR-767-3p	NFATC3
									DYRK1A	hsa-miR-3199		hsa-miR-6731-5p	NFATC3		hsa-miR-767-3p	NFATC3
									DYRK1A	hsa-miR-3613-3p		hsa-miR-221-3p	NFATC3		hsa-miR-767-3p	NFATC3
									DYRK1A	hsa-miR-3661		hsa-miR-8085	NFATC3		hsa-miR-768-5p	NFATC3
									DYRK1A	hsa-miR-4454		hsa-miR-92a-2-5p	NFATC3		hsa-miR-768-5p	NFATC3
									DYRK1A	hsa-miR-4525		hsa-miR-205-3p	NFATC3		hsa-miR-769-5p	NFATC3
									DYRK1A	hsa-miR-3677-5p		hsa-miR-7703	NFATC3		hsa-miR-769-5p	NFATC3
									DYRK1A	hsa-miR-1343		hsa-miR-6886-3p	NFATC3		hsa-miR-801	NFATC3
									DYRK1A	hsa-miR-5010-3p		hsa-miR-3175	NFATC3		hsa-miR-801	NFATC3
									DYRK1A	hsa-miR-1277-5p		hsa-miR-548n	NFATC3		hsa-miR-99b	NFATC3
									DYRK1A	hsa-miR-15a-5p		hsa-miR-3182	NFATC3		hsa-miR-99b	NFATC3
									DYRK1A	hsa-miR-16-5p		hsa-miR-3529-5p	NFATC3
									DYRK1A	hsa-miR-17-5p		hsa-miR-548v	NFATC3		hsa-miR-100	PPP3CA
									DYRK1A	hsa-miR-17-3p		hsa-miR-379-5p	NFATC3		hsa-miR-100	PPP3CA
									DYRK1A	hsa-miR-19a-3p		hsa-miR-4314	NFATC3		hsa-miR-149	PPP3CA
									DYRK1A	hsa-miR-19b-3p		hsa-miR-6752-3p	NFATC3		hsa-miR-149	PPP3CA
									DYRK1A	hsa-miR-25-3p		hsa-miR-6834-5p	NFATC3		hsa-miR-17-3p	PPP3CA
									DYRK1A	hsa-miR-26a-5p					hsa-miR-17-3p	PPP3CA
									DYRK1A	hsa-miR-26b-5p		hsa-miR-4293	NFATC4		hsa-miR-17-5p	PPP3CA
									DYRK1A	hsa-miR-27a-3p		hsa-miR-874-5p	NFATC4		hsa-miR-17-5p	PPP3CA
									DYRK1A	hsa-miR-31-5p		hsa-miR-4492	NFATC4		hsa-miR-186	PPP3CA
									DYRK1A	hsa-miR-92a-3p		hsa-miR-3918	NFATC4		hsa-miR-186	PPP3CA
									DYRK1A	hsa-miR-93-5p		hsa-miR-2467-3p	NFATC4		hsa-miR-188	PPP3CA
									DYRK1A	hsa-miR-148a-3p		hsa-miR-6797-5p	NFATC4		hsa-miR-188	PPP3CA
									DYRK1A	hsa-miR-7-5p		hsa-miR-4667-5p	NFATC4		hsa-miR-20b	PPP3CA
									DYRK1A	hsa-miR-182-5p		hsa-miR-3155b	NFATC4		hsa-miR-20b	PPP3CA
									DYRK1A	hsa-miR-183-5p		hsa-miR-3155a	NFATC4		hsa-miR-33	PPP3CA
									DYRK1A	hsa-miR-218-5p		hsa-miR-484	NFATC4		hsa-miR-33	PPP3CA
									DYRK1A	hsa-miR-221-3p		hsa-miR-4731-5p	NFATC4		hsa-miR-422a	PPP3CA
									DYRK1A	hsa-miR-222-3p		hsa-miR-7977	NFATC4		hsa-miR-422a	PPP3CA
									DYRK1A	hsa-miR-15b-5p		hsa-miR-2355-5p	NFATC4		hsa-miR-422b	PPP3CA
									DYRK1A	hsa-miR-27b-3p		hsa-miR-4726-5p	NFATC4		hsa-miR-422b	PPP3CA
									DYRK1A	hsa-miR-124-3p		hsa-miR-4640-5p	NFATC4		hsa-miR-512-3p	PPP3CA
									DYRK1A	hsa-miR-128		hsa-miR-6792-3p	NFATC4		hsa-miR-512-3p	PPP3CA
									DYRK1A	hsa-miR-9-5p		hsa-miR-4691-5p	NFATC4		hsa-miR-519a	PPP3CA
									DYRK1A	hsa-miR-126-5p		hsa-miR-637	NFATC4		hsa-miR-519a	PPP3CA
									DYRK1A	hsa-miR-186-5p		hsa-miR-423-5p	NFATC4		hsa-miR-519a	PPP3CA
									DYRK1A	hsa-miR-195-5p		hsa-miR-4306	NFATC4		hsa-miR-519a	PPP3CA
									DYRK1A	hsa-miR-320a		hsa-miR-3173-3p	NFATC4		hsa-miR-519b	PPP3CA
									DYRK1A	hsa-miR-361-5p		hsa-miR-6891-5p	NFATC4		hsa-miR-519b	PPP3CA
									DYRK1A	hsa-miR-374a-5p		hsa-miR-219a-2-3p	NFATC4		hsa-miR-519d	PPP3CA
									DYRK1A	hsa-miR-378a-3p		hsa-miR-3180-5p	NFATC4		hsa-miR-519d	PPP3CA
									DYRK1A	hsa-miR-148b-3p		hsa-miR-5193	NFATC4		hsa-miR-520g	PPP3CA
									DYRK1A	hsa-miR-335-5p		hsa-miR-4478	NFATC4		hsa-miR-520g	PPP3CA
									DYRK1A	hsa-miR-20b-5p		hsa-miR-1249-5p	NFATC4		hsa-miR-520h	PPP3CA
									DYRK1A	hsa-miR-200a-5p		hsa-miR-6849-3p	NFATC4		hsa-miR-520h	PPP3CA
									DYRK1A	hsa-miR-486-5p		hsa-miR-5690	NFATC4		hsa-miR-524*	PPP3CA
									DYRK1A	hsa-miR-518c-5p		hsa-miR-4779	NFATC4		hsa-miR-524*	PPP3CA
									DYRK1A	hsa-miR-505-3p		hsa-miR-6878-3p	NFATC4		hsa-miR-524*	PPP3CA
									DYRK1A	hsa-miR-506-3p		hsa-miR-6859-3p	NFATC4		hsa-miR-524*	PPP3CA
									DYRK1A	hsa-miR-455-5p		hsa-miR-1254	NFATC4		hsa-miR-539	PPP3CA
									DYRK1A	hsa-miR-92b-3p		hsa-miR-4524a-3p	NFATC4		hsa-miR-539	PPP3CA
									DYRK1A	hsa-miR-582-5p		hsa-miR-3116	NFATC4		hsa-miR-574-5p	PPP3CA
									DYRK1A	hsa-miR-625-5p		hsa-miR-1275	NFATC4		hsa-miR-574-5p	PPP3CA
									DYRK1A	hsa-miR-629-3p		hsa-miR-6730-5p	NFATC4		hsa-miR-583	PPP3CA
									DYRK1A	hsa-miR-425-5p		hsa-miR-378g	NFATC4		hsa-miR-583	PPP3CA
									DYRK1A	hsa-miR-20a-3p		hsa-miR-516b-5p	NFATC4		hsa-miR-593	PPP3CA
									DYRK1A	hsa-miR-29a-5p		hsa-miR-320e	NFATC4		hsa-miR-593	PPP3CA
									DYRK1A	hsa-miR-31-3p		hsa-miR-1827	NFATC4		hsa-miR-600	PPP3CA
									DYRK1A	hsa-miR-93-3p		hsa-miR-7160-5p	NFATC4		hsa-miR-600	PPP3CA
									DYRK1A	hsa-miR-16-2-3p		hsa-miR-185-3p	NFATC4		hsa-miR-605	PPP3CA
									DYRK1A	hsa-miR-181a-2-3p		hsa-miR-1207-5p	NFATC4		hsa-miR-605	PPP3CA
									DYRK1A	hsa-miR-200b-5p					hsa-miR-628	PPP3CA
									DYRK1A	hsa-miR-186-3p		hsa-miR-5582-3p	PPP3CA		hsa-miR-628	PPP3CA
									DYRK1A	hsa-miR-151a-5p		hsa-miR-3613-3p	PPP3CA		hsa-miR-635	PPP3CA
									DYRK1A	hsa-miR-335-3p		hsa-miR-3123	PPP3CA		hsa-miR-635	PPP3CA
									DYRK1A	hsa-miR-497-3p		hsa-miR-95-5p	PPP3CA		hsa-miR-653	PPP3CA
									DYRK1A	hsa-miR-411-3p		hsa-miR-548ah-5p	PPP3CA		hsa-miR-653	PPP3CA
									DYRK1A	hsa-miR-744-3p		hsa-miR-153-5p	PPP3CA		hsa-miR-654	PPP3CA
									DYRK1A	hsa-miR-374b-5p		hsa-miR-548an	PPP3CA		hsa-miR-654	PPP3CA
									DYRK1A	hsa-miR-374b-3p		hsa-miR-3609	PPP3CA		hsa-miR-671	PPP3CA
									DYRK1A	hsa-miR-522-5p		hsa-miR-3910	PPP3CA		hsa-miR-671	PPP3CA
									DYRK1A	hsa-miR-3157-5p		hsa-miR-4668-5p	PPP3CA		hsa-miR-802	PPP3CA
									DYRK1A	hsa-miR-3187-3p		hsa-miR-548t-5p	PPP3CA		hsa-miR-802	PPP3CA
									DYRK1A	hsa-miR-324-3p		hsa-miR-512-3p	PPP3CA		hsa-miR-923	PPP3CA
									DYRK1A	hsa-miR-199a-3p		hsa-miR-548az-5p	PPP3CA		hsa-miR-923	PPP3CA
									DYRK1A	hsa-miR-139-5p		hsa-miR-548p	PPP3CA		hsa-miR-923	PPP3CA
									DYRK1A	hsa-miR-671-5p		hsa-miR-98-3p	PPP3CA		hsa-miR-99a	PPP3CA
									HOMER2	hsa-let-7b-5p		hsa-miR-4540	PPP3CA		hsa-miR-99a	PPP3CA
									HOMER2	hsa-let-7b-5p		hsa-miR-4469	PPP3CA
									HOMER2	hsa-let-7i-5p		hsa-let-7f-1-3p	PPP3CA		hsa-let-7b	PPP3CB
									HOMER2	hsa-let-7i-5p		hsa-let-7a-3p	PPP3CA		hsa-let-7b	PPP3CB
									HOMER2	hsa-miR-98		hsa-let-7b-3p	PPP3CA		hsa-let-7e	PPP3CB
									HOMER2	hsa-let-7c		hsa-miR-548k	PPP3CA		hsa-let-7e	PPP3CB
									HOMER2	hsa-let-7c		hsa-miR-548av-5p	PPP3CA		hsa-miR-101	PPP3CB
									HOMER2	hsa-let-7e-5p		hsa-miR-8054	PPP3CA		hsa-miR-101	PPP3CB
									HOMER2	hsa-let-7f-5p		hsa-miR-5002-3p	PPP3CA		hsa-miR-103	PPP3CB
									HOMER2	hsa-let-7f-5p		hsa-miR-3142	PPP3CA		hsa-miR-103	PPP3CB
									HOMER2	hsa-miR-9-3p		hsa-miR-5584-5p	PPP3CA		hsa-miR-105	PPP3CB
									HOMER2	hsa-let-7a-5p		hsa-miR-6869-5p	PPP3CA		hsa-miR-105	PPP3CB
									HOMER2	hsa-let-7a-5p		hsa-miR-493-5p	PPP3CA		hsa-miR-106a	PPP3CB
									HOMER2	hsa-let-7g-5p		hsa-miR-7-1-3p	PPP3CA		hsa-miR-106a	PPP3CB
									HOMER2	hsa-let-7g-5p		hsa-miR-7-2-3p	PPP3CA		hsa-miR-106a	PPP3CB
									HOMER2	hsa-miR-142-5p		hsa-miR-4660	PPP3CA		hsa-miR-106b	PPP3CB
									HOMER2	hsa-miR-4458		hsa-miR-513b-3p	PPP3CA		hsa-miR-106b	PPP3CB
									HOMER2	hsa-let-7d-5p		hsa-miR-3148	PPP3CA		hsa-miR-106b	PPP3CB
									HOMER2	hsa-let-7d-5p		hsa-miR-335-3p	PPP3CA		hsa-miR-124a	PPP3CB
									HOMER2	hsa-miR-548ap-3p		hsa-miR-361-3p	PPP3CA		hsa-miR-124a	PPP3CB
									HOMER2	hsa-miR-940		hsa-miR-373-5p	PPP3CA		hsa-miR-125b	PPP3CB
									HOMER2	hsa-miR-452-3p		hsa-miR-5187-3p	PPP3CA		hsa-miR-125b	PPP3CB
									HOMER2	hsa-miR-17-3p		hsa-miR-371b-5p	PPP3CA		hsa-miR-133a	PPP3CB
									HOMER2	hsa-miR-93-3p		hsa-miR-616-5p	PPP3CA		hsa-miR-139	PPP3CB
									HOMER2	hsa-miR-31-5p		hsa-miR-8064	PPP3CA		hsa-miR-139	PPP3CB
									HOMER2	hsa-miR-550a-3p		hsa-miR-7110-3p	PPP3CA		hsa-miR-145	PPP3CB
									HOMER2	hsa-miR-653		hsa-miR-1303	PPP3CA		hsa-miR-146a	PPP3CB
									HOMER2	hsa-miR-4708-3p		hsa-miR-4761-3p	PPP3CA		hsa-miR-146a	PPP3CB
									HOMER2	hsa-miR-375		hsa-miR-6516-5p	PPP3CA		hsa-miR-146b	PPP3CB
									HOMER2	hsa-miR-103a-2-5p		hsa-miR-548al	PPP3CA		hsa-miR-146b	PPP3CB
									HOMER2	hsa-miR-188-3p		hsa-miR-3160-5p	PPP3CA		hsa-miR-152	PPP3CB
									HOMER2	hsa-miR-1260b		hsa-miR-4445-3p	PPP3CA		hsa-miR-152	PPP3CB
									HOMER2	hsa-miR-3615		hsa-miR-31-5p	PPP3CA		hsa-miR-153	PPP3CB
									HOMER2	hsa-miR-124-3p		hsa-miR-4652-3p	PPP3CA		hsa-miR-153	PPP3CB
									HOMER2	hsa-miR-18a-3p		hsa-miR-7849-3p	PPP3CA		hsa-miR-154*	PPP3CB
									HOMER2	hsa-miR-505-5p		hsa-miR-145-5p	PPP3CA		hsa-miR-154*	PPP3CB
									HOMER2	hsa-miR-2114-5p		hsa-miR-99a-5p	PPP3CA		hsa-miR-15b	PPP3CB
									HOMER2	hsa-miR-375		hsa-miR-100-5p	PPP3CA		hsa-miR-15b	PPP3CB
									HOMER2	hsa-miR-340-3p		hsa-miR-99b-5p	PPP3CA		hsa-miR-17-5p	PPP3CB
									HOMER2	hsa-miR-340-5p		hsa-miR-5195-3p	PPP3CA		hsa-miR-17-5p	PPP3CB
									HOMER2	hsa-miR-744-3p		hsa-miR-3185	PPP3CA		hsa-miR-17-5p	PPP3CB
									ITPR1	hsa-miR-32-5p		hsa-miR-6873-3p	PPP3CA		hsa-miR-181d	PPP3CB
									ITPR1	hsa-miR-335-5p		hsa-miR-1910-3p	PPP3CA		hsa-miR-181d	PPP3CB
									ITPR1	hsa-miR-424-5p		hsa-miR-4473	PPP3CA		hsa-miR-18a	PPP3CB
									ITPR1	hsa-miR-340-5p		hsa-miR-6511a-5p	PPP3CA		hsa-miR-18a	PPP3CB
									ITPR1	hsa-miR-335-5p		hsa-miR-33a-3p	PPP3CA		hsa-miR-18a	PPP3CB
									ITPR1	hsa-miR-335-5p		hsa-miR-374b-3p	PPP3CA		hsa-miR-18a	PPP3CB
									ITPR1	hsa-miR-335-5p		hsa-miR-3662	PPP3CA		hsa-miR-18a*	PPP3CB
									ITPR1	hsa-miR-107		hsa-miR-891a-3p	PPP3CA		hsa-miR-18a*	PPP3CB
									ITPR1	hsa-miR-429		hsa-miR-4325	PPP3CA		hsa-miR-18b	PPP3CB
									ITPR1	hsa-miR-507		hsa-miR-5195-5p	PPP3CA		hsa-miR-18b	PPP3CB
									ITPR1	hsa-miR-588		hsa-miR-513c-3p	PPP3CA		hsa-miR-18b	PPP3CB
									ITPR1	hsa-miR-641		hsa-miR-194-5p	PPP3CA		hsa-miR-18b	PPP3CB
									ITPR1	hsa-miR-362-3p		hsa-miR-1245b-5p	PPP3CA		hsa-miR-192	PPP3CB
									ITPR1	hsa-miR-450b-5p		hsa-miR-4708-3p	PPP3CA		hsa-miR-192	PPP3CB
									ITPR1	hsa-miR-939		hsa-miR-3606-3p	PPP3CA		hsa-miR-196b	PPP3CB
									ITPR1	hsa-miR-548e		hsa-miR-513a-3p	PPP3CA		hsa-miR-196b	PPP3CB
									ITPR1	hsa-miR-548f		hsa-miR-589-3p	PPP3CA		hsa-miR-20a	PPP3CB
									ITPR1	hsa-miR-1910		hsa-miR-513b-5p	PPP3CA		hsa-miR-20a	PPP3CB
									ITPR1	hsa-miR-3179		hsa-miR-548ah-3p	PPP3CA		hsa-miR-20a	PPP3CB
									ITPR1	hsa-miR-23c		hsa-miR-548j-3p	PPP3CA		hsa-miR-20b	PPP3CB
									ITPR1	hsa-miR-4685-3p		hsa-miR-501-3p	PPP3CA		hsa-miR-20b	PPP3CB
									ITPR1	hsa-miR-19a-3p		hsa-miR-548aj-3p	PPP3CA		hsa-miR-20b	PPP3CB
									ITPR1	hsa-miR-19b-3p		hsa-miR-502-3p	PPP3CA		hsa-miR-214	PPP3CB
									ITPR1	hsa-miR-23a-3p		hsa-miR-548aq-3p	PPP3CA		hsa-miR-214	PPP3CB
									ITPR1	hsa-miR-25-3p		hsa-miR-548ae-3p	PPP3CA		hsa-miR-215	PPP3CB
									ITPR1	hsa-miR-31-5p		hsa-miR-7159-3p	PPP3CA		hsa-miR-215	PPP3CB
									ITPR1	hsa-miR-32-5p		hsa-miR-6768-3p	PPP3CA		hsa-miR-22	PPP3CB
									ITPR1	hsa-miR-92a-3p		hsa-miR-548x-3p	PPP3CA		hsa-miR-221	PPP3CB
									ITPR1	hsa-miR-103a-3p		hsa-miR-548am-3p	PPP3CA		hsa-miR-221	PPP3CB
									ITPR1	hsa-miR-197-3p		hsa-miR-519a-3p	PPP3CA		hsa-miR-221	PPP3CB
									ITPR1	hsa-miR-183-5p		hsa-miR-2392	PPP3CA		hsa-miR-222	PPP3CB
									ITPR1	hsa-miR-204-5p		hsa-miR-519c-3p	PPP3CA		hsa-miR-222	PPP3CB
									ITPR1	hsa-miR-200b-3p		hsa-miR-519b-3p	PPP3CA		hsa-miR-222	PPP3CB
									ITPR1	hsa-miR-23b-3p		hsa-miR-583	PPP3CA		hsa-miR-25	PPP3CB
									ITPR1	hsa-miR-200c-3p		hsa-miR-6774-5p	PPP3CA		hsa-miR-25	PPP3CB
									ITPR1	hsa-miR-335-5p		hsa-miR-642a-5p	PPP3CA		hsa-miR-302a	PPP3CB
									ITPR1	hsa-miR-452-5p		hsa-miR-561-3p	PPP3CA		hsa-miR-302a	PPP3CB
									ITPR1	hsa-miR-497-5p		hsa-miR-4666a-3p	PPP3CA		hsa-miR-30e-3p	PPP3CB
									ITPR1	hsa-miR-92b-3p		hsa-miR-635	PPP3CA		hsa-miR-31	PPP3CB
									ITPR1	hsa-miR-589-3p		hsa-miR-524-5p	PPP3CA		hsa-miR-31	PPP3CB
									ITPR1	hsa-miR-548d-3p		hsa-miR-520d-5p	PPP3CA		hsa-miR-320	PPP3CB
									ITPR1	hsa-miR-425-5p		hsa-miR-8065	PPP3CA		hsa-miR-320	PPP3CB
									ITPR1	hsa-miR-16-1-3p		hsa-miR-6867-3p	PPP3CA		hsa-miR-320	PPP3CB
									ITPR1	hsa-miR-26b-3p		hsa-miR-3653-3p	PPP3CA		hsa-miR-320	PPP3CB
									ITPR1	hsa-miR-29b-1-5p		hsa-miR-3189-3p	PPP3CA		hsa-miR-324-3p	PPP3CB
									ITPR1	hsa-miR-7-1-3p		hsa-miR-4457	PPP3CA		hsa-miR-324-3p	PPP3CB
									ITPR1	hsa-miR-130b-5p		hsa-miR-3607-3p	PPP3CA		hsa-miR-326	PPP3CB
									ITPR1	hsa-miR-340-5p		hsa-miR-6809-5p	PPP3CA		hsa-miR-326	PPP3CB
									ITPR1	hsa-miR-424-3p		hsa-miR-208a-5p	PPP3CA		hsa-miR-329	PPP3CB
									ITPR1	hsa-miR-153		hsa-miR-208b-5p	PPP3CA		hsa-miR-329	PPP3CB
									MAP3K7	hsa-miR-10a-5p		hsa-miR-6501-3p	PPP3CA		hsa-miR-330	PPP3CB
									MAP3K7	hsa-miR-129-2-3p		hsa-miR-4744	PPP3CA		hsa-miR-330	PPP3CB
									MAP3K7	hsa-miR-16-5p		hsa-miR-802	PPP3CA		hsa-miR-337	PPP3CB
									MAP3K7	hsa-miR-103a-3p		hsa-miR-4662a-3p	PPP3CA		hsa-miR-337	PPP3CB
									MAP3K7	hsa-miR-10a-5p		hsa-miR-6811-3p	PPP3CA		hsa-miR-339	PPP3CB
									MAP3K7	hsa-miR-10a-5p		hsa-miR-6794-3p	PPP3CA		hsa-miR-339	PPP3CB
									MAP3K7	hsa-miR-34a-5p		hsa-miR-3658	PPP3CA		hsa-miR-342	PPP3CB
									MAP3K7	hsa-miR-1226-5p		hsa-miR-4328	PPP3CA		hsa-miR-342	PPP3CB
									MAP3K7	hsa-miR-31-5p		hsa-miR-548as-3p	PPP3CA		hsa-miR-346	PPP3CB
									MAP3K7	hsa-let-7c		hsa-miR-5589-3p	PPP3CA		hsa-miR-346	PPP3CB
									MAP3K7	hsa-miR-98		hsa-miR-656-5p	PPP3CA		hsa-miR-368	PPP3CB
									MAP3K7	hsa-miR-107		hsa-miR-4282	PPP3CA		hsa-miR-368	PPP3CB
									MAP3K7	hsa-miR-651		hsa-miR-4659a-5p	PPP3CA		hsa-miR-372	PPP3CB
									MAP3K7	hsa-miR-423-5p		hsa-miR-4659b-5p	PPP3CA		hsa-miR-373*	PPP3CB
									MAP3K7	hsa-miR-508-5p		hsa-miR-17-3p	PPP3CA		hsa-miR-373*	PPP3CB
									MAP3K7	hsa-miR-590-3p		hsa-miR-449b-3p	PPP3CA		hsa-miR-373*	PPP3CB
									MAP3K7	hsa-miR-1299		hsa-miR-8076	PPP3CA		hsa-miR-381	PPP3CB
									MAP3K7	ebv-miR-BART22		hsa-miR-4317	PPP3CA		hsa-miR-432	PPP3CB
									MAP3K7	hsa-miR-3651		hsa-miR-4503	PPP3CA		hsa-miR-432	PPP3CB
									MAP3K7	hsa-miR-644b-3p		hsa-miR-1-5p	PPP3CA		hsa-miR-452	PPP3CB
									MAP3K7	hsa-let-7a-5p		hsa-miR-544b	PPP3CA		hsa-miR-452	PPP3CB
									MAP3K7	hsa-let-7b-5p		hsa-miR-1283	PPP3CA		hsa-miR-454-5p	PPP3CB
									MAP3K7	hsa-let-7e-5p					hsa-miR-454-5p	PPP3CB
									MAP3K7	hsa-let-7f-5p		hsa-miR-3179	PPP3CB		hsa-miR-483-5p	PPP3CB
									MAP3K7	hsa-miR-15a-5p		hsa-miR-6837-5p	PPP3CB		hsa-miR-483-5p	PPP3CB
									MAP3K7	hsa-miR-16-5p		hsa-miR-450b-5p	PPP3CB		hsa-miR-485-5p	PPP3CB
									MAP3K7	hsa-miR-27a-3p		hsa-miR-1297	PPP3CB		hsa-miR-485-5p	PPP3CB
									MAP3K7	hsa-miR-30a-5p		hsa-miR-4267	PPP3CB		hsa-miR-491	PPP3CB
									MAP3K7	hsa-miR-32-5p		hsa-miR-6502-3p	PPP3CB		hsa-miR-491	PPP3CB
									MAP3K7	hsa-miR-33a-5p		hsa-miR-449b-3p	PPP3CB		hsa-miR-497	PPP3CB
									MAP3K7	hsa-miR-92a-3p		hsa-miR-4282	PPP3CB		hsa-miR-497	PPP3CB
									MAP3K7	hsa-miR-96-5p		hsa-miR-1227-5p	PPP3CB		hsa-miR-503	PPP3CB
									MAP3K7	hsa-miR-101-3p		hsa-miR-3121-5p	PPP3CB		hsa-miR-503	PPP3CB
									MAP3K7	hsa-miR-103a-3p		hsa-miR-4685-5p	PPP3CB		hsa-miR-504	PPP3CB
									MAP3K7	hsa-miR-129-5p		hsa-miR-892c-3p	PPP3CB		hsa-miR-504	PPP3CB
									MAP3K7	hsa-miR-30c-5p		hsa-miR-4676-3p	PPP3CB		hsa-miR-507	PPP3CB
									MAP3K7	hsa-miR-30d-5p		hsa-miR-452-5p	PPP3CB		hsa-miR-507	PPP3CB
									MAP3K7	hsa-let-7g-5p		hsa-miR-1178-3p	PPP3CB		hsa-miR-513	PPP3CB
									MAP3K7	hsa-let-7i-5p		hsa-miR-4511	PPP3CB		hsa-miR-513	PPP3CB
									MAP3K7	hsa-miR-15b-5p		hsa-miR-218-1-3p	PPP3CB		hsa-miR-518a	PPP3CB
									MAP3K7	hsa-miR-27b-3p		hsa-miR-4803	PPP3CB		hsa-miR-518a	PPP3CB
									MAP3K7	hsa-miR-30b-5p		hsa-miR-586	PPP3CB		hsa-miR-518c	PPP3CB
									MAP3K7	hsa-miR-9-3p		hsa-miR-4465	PPP3CB		hsa-miR-518c	PPP3CB
									MAP3K7	hsa-miR-126-5p		hsa-miR-26a-5p	PPP3CB		hsa-miR-518d	PPP3CB
									MAP3K7	hsa-miR-146a-5p		hsa-miR-26b-5p	PPP3CB		hsa-miR-518d	PPP3CB
									MAP3K7	hsa-miR-30e-5p		hsa-miR-1468-3p	PPP3CB		hsa-miR-518e	PPP3CB
									MAP3K7	hsa-miR-30e-3p		hsa-miR-183-3p	PPP3CB		hsa-miR-518e	PPP3CB
									MAP3K7	hsa-miR-146b-5p		hsa-miR-5589-3p	PPP3CB		hsa-miR-518f	PPP3CB
									MAP3K7	hsa-miR-499a-5p		hsa-miR-3116	PPP3CB		hsa-miR-518f	PPP3CB
									MAP3K7	hsa-miR-18a-3p		hsa-miR-1254	PPP3CB		hsa-miR-519d	PPP3CB
									MAP3K7	hsa-miR-545-3p		hsa-miR-7154-5p	PPP3CB		hsa-miR-519d	PPP3CB
									MAP3K7	hsa-miR-92b-3p		hsa-miR-3128	PPP3CB		hsa-miR-520a*	PPP3CB
									MAP3K7	hsa-miR-33b-5p		hsa-miR-5689	PPP3CB		hsa-miR-520a*	PPP3CB
									MAP3K7	hsa-miR-21-3p		hsa-miR-4761-3p	PPP3CB		hsa-miR-520d	PPP3CB
									MAP3K7	hsa-miR-29a-5p		hsa-miR-1245b-3p	PPP3CB		hsa-miR-520d	PPP3CB
									MAP3K7	hsa-miR-16-2-3p		hsa-miR-6747-5p	PPP3CB		hsa-miR-520g	PPP3CB
									MAP3K7	hsa-miR-145-3p		hsa-miR-544b	PPP3CB		hsa-miR-520g	PPP3CB
									MAP3K7	hsa-miR-186-3p		hsa-miR-885-3p	PPP3CB		hsa-miR-520g	PPP3CB
									MAP3K7	hsa-miR-148b-5p		hsa-miR-5011-3p	PPP3CB		hsa-miR-520g	PPP3CB
									MAP3K7	hsa-miR-589-5p		hsa-miR-3163	PPP3CB		hsa-miR-521	PPP3CB
									MAP3K7	hsa-miR-1271-5p		hsa-miR-6887-3p	PPP3CB		hsa-miR-521	PPP3CB
									MAP3K7	hsa-miR-103a-2-5p		hsa-miR-3658	PPP3CB		hsa-miR-524	PPP3CB
									MAP3K7	hsa-miR-137		hsa-miR-326	PPP3CB		hsa-miR-524	PPP3CB
									MAP3K7	kshv-miR-K12-5		hsa-miR-8054	PPP3CB		hsa-miR-525*	PPP3CB
									MAP3K7	hsa-miR-579		hsa-miR-330-5p	PPP3CB		hsa-miR-525*	PPP3CB
									MAP3K7	hsa-miR-297		hsa-miR-548k	PPP3CB		hsa-miR-548a	PPP3CB
									TAB1	hsa-miR-1229		hsa-miR-7155-5p	PPP3CB		hsa-miR-548d	PPP3CB
									TAB1	hsa-miR-140-3p		hsa-miR-548av-5p	PPP3CB		hsa-miR-548d	PPP3CB
									TAB1	hsa-miR-30d-5p		hsa-miR-4802-5p	PPP3CB		hsa-miR-558	PPP3CB
									TAB1	hsa-miR-597		hsa-miR-6805-5p	PPP3CB		hsa-miR-558	PPP3CB
									TAB1	hsa-miR-3657		hsa-miR-34c-3p	PPP3CB		hsa-miR-558	PPP3CB
									TAB1	hsa-miR-33a-5p		hsa-miR-548aw	PPP3CB		hsa-miR-562	PPP3CB
									TAB1	hsa-miR-182-5p		hsa-miR-205-3p	PPP3CB		hsa-miR-562	PPP3CB
									TAB1	hsa-miR-128		hsa-miR-6783-5p	PPP3CB		hsa-miR-570	PPP3CB
									TAB2	hsa-miR-107		hsa-miR-618	PPP3CB		hsa-miR-570	PPP3CB
									TAB2	hsa-miR-103a-3p		hsa-miR-641	PPP3CB		hsa-miR-571	PPP3CB
									TAB2	hsa-miR-34a-5p		hsa-miR-1324	PPP3CB		hsa-miR-573	PPP3CB
									TAB2	hsa-let-7c		hsa-miR-410-3p	PPP3CB		hsa-miR-589	PPP3CB
									TAB2	hsa-miR-98		hsa-miR-3148	PPP3CB		hsa-miR-589	PPP3CB
									TAB2	hsa-miR-98		hsa-miR-3617-5p	PPP3CB		hsa-miR-593	PPP3CB
									TAB2	hsa-miR-107		hsa-miR-6876-5p	PPP3CB		hsa-miR-600	PPP3CB
									TAB2	hsa-miR-203		hsa-miR-4476	PPP3CB		hsa-miR-600	PPP3CB
									TAB2	hsa-miR-142-3p		hsa-miR-628-3p	PPP3CB		hsa-miR-608	PPP3CB
									TAB2	hsa-miR-552		hsa-miR-323b-3p	PPP3CB		hsa-miR-608	PPP3CB
									TAB2	hsa-miR-542-3p		hsa-miR-520f-5p	PPP3CB		hsa-miR-612	PPP3CB
									TAB2	hsa-miR-769-3p		hsa-miR-3662	PPP3CB		hsa-miR-612	PPP3CB
									TAB2	hsa-miR-576-3p		hsa-miR-6862-5p	PPP3CB		hsa-miR-613	PPP3CB
									TAB2	hsa-miR-590-3p		hsa-miR-4253	PPP3CB		hsa-miR-621	PPP3CB
									TAB2	hsa-miR-887		hsa-miR-585-5p	PPP3CB		hsa-miR-621	PPP3CB
									TAB2	hsa-miR-548k		hsa-miR-4799-5p	PPP3CB		hsa-miR-622	PPP3CB
									TAB2	hsa-miR-1303		hsa-miR-6737-5p	PPP3CB		hsa-miR-622	PPP3CB
									TAB2	hsa-miR-1292		hsa-miR-6819-5p	PPP3CB		hsa-miR-637	PPP3CB
									TAB2	hsa-miR-3174		hsa-miR-6812-5p	PPP3CB		hsa-miR-637	PPP3CB
									TAB2	hsa-miR-3176		hsa-miR-4290	PPP3CB		hsa-miR-639	PPP3CB
									TAB2	hsa-miR-3065-5p		hsa-miR-591	PPP3CB		hsa-miR-639	PPP3CB
									TAB2	hsa-miR-3689a-3p		hsa-miR-875-3p	PPP3CB		hsa-miR-646	PPP3CB
									TAB2	hsa-miR-3934		hsa-miR-1252-3p	PPP3CB		hsa-miR-646	PPP3CB
									TAB2	hsa-miR-4484		hsa-miR-4305	PPP3CB		hsa-miR-646	PPP3CB
									TAB2	hsa-miR-5187-5p		hsa-miR-6772-5p	PPP3CB		hsa-miR-647	PPP3CB
									TAB2	hsa-miR-181b-3p		hsa-miR-2467-3p	PPP3CB		hsa-miR-647	PPP3CB
									TAB2	hsa-let-7a-5p		hsa-miR-124-5p	PPP3CB		hsa-miR-650	PPP3CB
									TAB2	hsa-let-7a-5p		hsa-miR-4260	PPP3CB		hsa-miR-650	PPP3CB
									TAB2	hsa-let-7b-5p		hsa-miR-3158-5p	PPP3CB		hsa-miR-658	PPP3CB
									TAB2	hsa-let-7d-5p		hsa-miR-3191-5p	PPP3CB		hsa-miR-658	PPP3CB
									TAB2	hsa-let-7e-5p		hsa-miR-3680-3p	PPP3CB		hsa-miR-660	PPP3CB
									TAB2	hsa-let-7f-5p		hsa-miR-4694-3p	PPP3CB		hsa-miR-660	PPP3CB
									TAB2	hsa-let-7f-5p		hsa-miR-129-5p	PPP3CB		hsa-miR-660	PPP3CB
									TAB2	hsa-miR-15a-5p		hsa-miR-3187-5p	PPP3CB		hsa-miR-661	PPP3CB
									TAB2	hsa-miR-16-5p		hsa-miR-6860	PPP3CB		hsa-miR-767-3p	PPP3CB
									TAB2	hsa-miR-19a-3p		hsa-miR-5189-5p	PPP3CB		hsa-miR-769-3p	PPP3CB
									TAB2	hsa-miR-19b-3p		hsa-miR-612	PPP3CB		hsa-miR-769-3p	PPP3CB
									TAB2	hsa-miR-22-3p		hsa-miR-486-5p	PPP3CB		hsa-miR-770-5p	PPP3CB
									TAB2	hsa-miR-26a-5p		hsa-miR-1285-3p	PPP3CB		hsa-miR-770-5p	PPP3CB
									TAB2	hsa-miR-32-5p		hsa-miR-1972	PPP3CB		hsa-miR-802	PPP3CB
									TAB2	hsa-miR-92a-3p		hsa-miR-570-3p	PPP3CB		hsa-miR-802	PPP3CB
									TAB2	hsa-miR-96-5p		hsa-miR-6838-3p	PPP3CB		hsa-miR-802	PPP3CB
									TAB2	hsa-miR-103a-3p		hsa-miR-124-3p	PPP3CB		hsa-miR-923	PPP3CB
									TAB2	hsa-miR-196a-5p		hsa-miR-5683	PPP3CB		hsa-miR-93	PPP3CB
									TAB2	hsa-miR-181a-5p		hsa-miR-6852-3p	PPP3CB
									TAB2	hsa-miR-182-5p		hsa-miR-340-5p	PPP3CB		hsa-miR-105	PPP3R1
									TAB2	hsa-miR-204-5p		hsa-miR-6082	PPP3CB		hsa-miR-105	PPP3R1
									TAB2	hsa-miR-224-5p		hsa-miR-506-3p	PPP3CB		hsa-miR-106a	PPP3R1
									TAB2	hsa-let-7g-5p		hsa-miR-1264	PPP3CB		hsa-miR-106a	PPP3R1
									TAB2	hsa-let-7i-5p		hsa-miR-513c-3p	PPP3CB		hsa-miR-106b	PPP3R1
									TAB2	hsa-miR-15b-5p		hsa-miR-4262	PPP3CB		hsa-miR-106b	PPP3R1
									TAB2	hsa-miR-15b-5p		hsa-miR-376c-3p	PPP3CB		hsa-miR-151	PPP3R1
									TAB2	hsa-miR-23b-3p		hsa-miR-513a-3p	PPP3CB		hsa-miR-151	PPP3R1
									TAB2	hsa-miR-143-3p		hsa-miR-3606-3p	PPP3CB		hsa-miR-17-5p	PPP3R1
									TAB2	hsa-miR-146a-5p		hsa-miR-4266	PPP3CB		hsa-miR-17-5p	PPP3R1
									TAB2	hsa-miR-185-5p		hsa-miR-4642	PPP3CB		hsa-miR-181a	PPP3R1
									TAB2	hsa-miR-195-5p		hsa-miR-5089-3p	PPP3CB		hsa-miR-181a	PPP3R1
									TAB2	hsa-miR-155-5p		hsa-miR-7976	PPP3CB		hsa-miR-188	PPP3R1
									TAB2	hsa-miR-155-5p		hsa-miR-218-2-3p	PPP3CB		hsa-miR-188	PPP3R1
									TAB2	hsa-miR-378a-5p		hsa-miR-7162-3p	PPP3CB		hsa-miR-199a*	PPP3R1
									TAB2	hsa-miR-486-5p		hsa-miR-6858-3p	PPP3CB		hsa-miR-199a*	PPP3R1
									TAB2	hsa-miR-146b-5p		hsa-miR-4796-5p	PPP3CB		hsa-miR-204	PPP3R1
									TAB2	hsa-miR-497-5p		hsa-miR-3119	PPP3CB		hsa-miR-204	PPP3R1
									TAB2	hsa-miR-92b-3p		hsa-miR-6834-5p	PPP3CB		hsa-miR-20a	PPP3R1
									TAB2	hsa-miR-425-5p		hsa-miR-190a-3p	PPP3CB		hsa-miR-20a	PPP3R1
									TAB2	hsa-miR-454-5p		hsa-miR-4470	PPP3CB		hsa-miR-211	PPP3R1
									TAB2	hsa-let-7f-2-3p		hsa-miR-8079	PPP3CB		hsa-miR-211	PPP3R1
									TAB2	hsa-miR-29a-5p		hsa-miR-4695-5p	PPP3CB		hsa-miR-221	PPP3R1
									TAB2	hsa-miR-92a-1-5p		hsa-miR-548u	PPP3CB		hsa-miR-221	PPP3R1
									TAB2	hsa-miR-29b-2-5p		hsa-miR-1245a	PPP3CB		hsa-miR-299-3p	PPP3R1
									TAB2	hsa-miR-148a-5p		hsa-miR-3180-5p	PPP3CB		hsa-miR-299-3p	PPP3R1
									TAB2	hsa-miR-7-1-3p		hsa-miR-216b-5p	PPP3CB		hsa-miR-302d	PPP3R1
									TAB2	hsa-miR-30b-3p		hsa-miR-4261	PPP3CB		hsa-miR-302d	PPP3R1
									TAB2	hsa-miR-30c-1-3p		hsa-miR-3689d	PPP3CB		hsa-miR-30a-3p	PPP3R1
									TAB2	hsa-miR-151a-5p		hsa-miR-6851-5p	PPP3CB		hsa-miR-30a-3p	PPP3R1
									TAB2	hsa-miR-148b-5p		hsa-miR-4641	PPP3CB		hsa-miR-30e-3p	PPP3R1
									TAB2	hsa-miR-335-3p		hsa-miR-3591-3p	PPP3CB		hsa-miR-30e-3p	PPP3R1
									TAB2	hsa-miR-92b-5p		hsa-miR-21-3p	PPP3CB		hsa-miR-31	PPP3R1
									TAB2	hsa-miR-664-3p		hsa-miR-95-5p	PPP3CB		hsa-miR-31	PPP3R1
									TAB2	hsa-miR-3127-5p		hsa-miR-4696	PPP3CB		hsa-miR-320	PPP3R1
									TAB2	hsa-miR-199a-3p		hsa-miR-552-5p	PPP3CB		hsa-miR-320	PPP3R1
									TAB2	hsa-miR-491-5p		hsa-miR-6818-5p	PPP3CB		hsa-miR-342	PPP3R1
									TAB2	hsa-miR-365a-5p		hsa-miR-889-3p	PPP3CB		hsa-miR-342	PPP3R1
									TAB2	hsa-miR-98		hsa-miR-5092	PPP3CB		hsa-miR-372	PPP3R1
									TAB2	hsa-miR-98		hsa-miR-3944-5p	PPP3CB		hsa-miR-372	PPP3R1
									TAB2	hsa-miR-34a-5p		hsa-miR-651-3p	PPP3CB		hsa-miR-373	PPP3R1
									TAB2	hsa-miR-182-5p		hsa-miR-139-5p	PPP3CB		hsa-miR-373	PPP3R1
									TAB2	hsa-miR-23b-3p		hsa-miR-6834-3p	PPP3CB		hsa-miR-433	PPP3R1
									TAB2	hsa-miR-155-5p					hsa-miR-433	PPP3R1
									TAB2	hsa-miR-155-5p		hsa-miR-5011-5p	PPP3R1		hsa-miR-448	PPP3R1
									TAB2	hsa-miR-522-5p		hsa-miR-548ag	PPP3R1		hsa-miR-448	PPP3R1
									TAB2	hsa-miR-520d-5p		hsa-miR-548ai	PPP3R1		hsa-miR-485-3p	PPP3R1
									CSNK1A1	hsa-miR-148a-5p		hsa-miR-651-3p	PPP3R1		hsa-miR-485-3p	PPP3R1
									CSNK1A1	hsa-miR-155-5p		hsa-miR-4516	PPP3R1		hsa-miR-520a*	PPP3R1
									CSNK1A1	hsa-miR-155-5p		hsa-miR-7-1-3p	PPP3R1		hsa-miR-520a*	PPP3R1
									CSNK1A1	hsa-miR-106a-5p		hsa-miR-548ba	PPP3R1		hsa-miR-520c	PPP3R1
									CSNK1A1	hsa-miR-153		hsa-miR-5580-3p	PPP3R1		hsa-miR-520c	PPP3R1
									CSNK1A1	hsa-miR-579		hsa-miR-570-5p	PPP3R1		hsa-miR-520d	PPP3R1
									CSNK1A1	hsa-miR-186-5p		hsa-miR-2467-5p	PPP3R1		hsa-miR-520d	PPP3R1
									CSNK1A1	hsa-miR-186-5p		hsa-miR-7-2-3p	PPP3R1		hsa-miR-520e	PPP3R1
									CSNK1A1	hsa-miR-148b-5p		hsa-miR-302e	PPP3R1		hsa-miR-520e	PPP3R1
									CSNK1A1	hsa-miR-320e		hsa-miR-30d-5p	PPP3R1		hsa-miR-525	PPP3R1
									CSNK1A1	hsa-miR-137		hsa-miR-30c-5p	PPP3R1		hsa-miR-525	PPP3R1
									CSNK1A1	hsa-miR-20a-5p		hsa-miR-5787	PPP3R1		hsa-miR-646	PPP3R1
									CSNK1A1	hsa-miR-20a-5p		hsa-miR-3922-3p	PPP3R1		hsa-miR-646	PPP3R1
									CSNK1A1	hsa-miR-548n		hsa-miR-3176	PPP3R1		hsa-miR-9*	PPP3R1
									CSNK1A1	hsa-miR-106b-5p		hsa-miR-3924	PPP3R1		hsa-miR-9*	PPP3R1
									CSNK1A1	hsa-miR-106b-5p		hsa-miR-30a-5p	PPP3R1		hsa-miR-923	PPP3R1
									CSNK1A1	hsa-miR-33a-3p		hsa-miR-30b-5p	PPP3R1		hsa-miR-96	PPP3R1
									CSNK1A1	hsa-miR-548ar-3p		hsa-miR-30e-5p	PPP3R1		hsa-miR-96	PPP3R1
									CSNK1A1	hsa-miR-500a-5p		hsa-miR-4505	PPP3R1
									CSNK1A1	hsa-miR-548a-3p		hsa-miR-4483	PPP3R1		hsa-miR-134	GSK3B
									CSNK1A1	hsa-miR-302a-3p		hsa-miR-5187-3p	PPP3R1		hsa-miR-134	GSK3B
									CSNK1A1	hsa-miR-22-3p		hsa-miR-4682	PPP3R1		hsa-miR-140	GSK3B
									CSNK1A1	hsa-miR-181a-2-3p		hsa-miR-485-3p	PPP3R1		hsa-miR-140	GSK3B
									CSNK1A1	hsa-miR-3613-5p		hsa-miR-539-3p	PPP3R1		hsa-miR-152	GSK3B
									CSNK1A1	hsa-miR-548o-3p		hsa-miR-4719	PPP3R1		hsa-miR-152	GSK3B
									CSNK1A1	hsa-miR-199b-3p		hsa-miR-4666a-5p	PPP3R1		hsa-miR-181a	GSK3B
									CSNK1A1	hsa-miR-199a-3p		hsa-miR-1297	PPP3R1		hsa-miR-181a	GSK3B
									CSNK1A1	hsa-miR-542-3p		hsa-miR-607	PPP3R1		hsa-miR-181b	GSK3B
									CSNK1A1	hsa-miR-216a		hsa-miR-4434	PPP3R1		hsa-miR-181b	GSK3B
									CSNK1A1	hsa-miR-101-3p		hsa-miR-4534	PPP3R1		hsa-miR-181d	GSK3B
									CSNK1A1	hsa-miR-101-3p		hsa-miR-491-3p	PPP3R1		hsa-miR-181d	GSK3B
									CSNK1A1	hsa-miR-217		hsa-miR-5703	PPP3R1		hsa-miR-187	GSK3B
									CSNK1A1	hsa-miR-17-3p		hsa-miR-190a-3p	PPP3R1		hsa-miR-187	GSK3B
									CSNK1A1	hsa-miR-107		hsa-miR-497-3p	PPP3R1		hsa-miR-196b	GSK3B
									CSNK1A1	hsa-miR-103a-3p		hsa-miR-298	PPP3R1		hsa-miR-196b	GSK3B
									CSNK1A1	hsa-miR-29a-3p		hsa-miR-1273f	PPP3R1		hsa-miR-199a	GSK3B
									CSNK1A1	hsa-miR-766-3p		hsa-miR-548az-3p	PPP3R1		hsa-miR-199a	GSK3B
									CSNK1A1	hsa-miR-16-1-3p		hsa-miR-548f-3p	PPP3R1		hsa-miR-199a	GSK3B
									CSNK1A1	hsa-miR-520a-3p		hsa-miR-548a-3p	PPP3R1		hsa-miR-199a	GSK3B
									CSNK1A1	hsa-miR-455-3p		hsa-miR-4495	PPP3R1		hsa-miR-210	GSK3B
									CSNK1A1	hsa-miR-424-3p		hsa-miR-548ar-3p	PPP3R1		hsa-miR-210	GSK3B
									CSNK1A1	hsa-miR-126-5p		hsa-miR-548e-3p	PPP3R1		hsa-miR-224	GSK3B
									CSNK1A1	hsa-miR-550a-3p		hsa-miR-520e	PPP3R1		hsa-miR-224	GSK3B
									CSNK1A1	hsa-miR-1910		hsa-miR-302c-3p	PPP3R1		hsa-miR-26a	GSK3B
									CSNK1A1	hsa-miR-27a-3p		hsa-let-7c-3p	PPP3R1		hsa-miR-26a	GSK3B
									CSNK1A1	hsa-miR-27b-3p		hsa-miR-520d-3p	PPP3R1		hsa-miR-26b	GSK3B
									CSNK1A1	hsa-miR-193a-5p		hsa-miR-302b-3p	PPP3R1		hsa-miR-26b	GSK3B
									CSNK1A1	hsa-miR-423-5p		hsa-miR-520c-3p	PPP3R1		hsa-miR-26b	GSK3B
									CSNK1A1	hsa-miR-1254		hsa-miR-372-3p	PPP3R1		hsa-miR-302a*	GSK3B
									CSNK1A1	hsa-miR-3611		hsa-miR-377-3p	PPP3R1		hsa-miR-302a*	GSK3B
									CSNK1A1	hsa-miR-3677-5p		hsa-miR-520b	PPP3R1		hsa-miR-302a*	GSK3B
									CSNK1A1	hsa-miR-4664-5p		hsa-miR-4531	PPP3R1		hsa-miR-320	GSK3B
									CSNK1A1	hsa-miR-1306-5p		hsa-miR-520a-3p	PPP3R1		hsa-miR-320	GSK3B
									CSNK1A1	hsa-let-7a-5p		hsa-miR-302a-3p	PPP3R1		hsa-miR-423	GSK3B
									CSNK1A1	hsa-let-7d-5p		hsa-miR-373-3p	PPP3R1		hsa-miR-486	GSK3B
									CSNK1A1	hsa-let-7f-5p		hsa-miR-548n	PPP3R1		hsa-miR-486	GSK3B
									CSNK1A1	hsa-miR-15a-5p		hsa-miR-302d-3p	PPP3R1		hsa-miR-489	GSK3B
									CSNK1A1	hsa-miR-16-5p		hsa-miR-548ay-5p	PPP3R1		hsa-miR-489	GSK3B
									CSNK1A1	hsa-miR-17-5p		hsa-miR-548w	PPP3R1		hsa-miR-497	GSK3B
									CSNK1A1	hsa-miR-17-5p		hsa-miR-548ae-5p	PPP3R1		hsa-miR-497	GSK3B
									CSNK1A1	hsa-miR-18a-5p		hsa-miR-548am-5p	PPP3R1		hsa-miR-500	GSK3B
									CSNK1A1	hsa-miR-19a-3p		hsa-miR-4461	PPP3R1		hsa-miR-500	GSK3B
									CSNK1A1	hsa-miR-21-5p		hsa-miR-548h-5p	PPP3R1		hsa-miR-502	GSK3B
									CSNK1A1	hsa-miR-30a-3p		hsa-miR-548ad-5p	PPP3R1		hsa-miR-510	GSK3B
									CSNK1A1	hsa-miR-93-5p		hsa-miR-548ar-5p	PPP3R1		hsa-miR-510	GSK3B
									CSNK1A1	hsa-miR-181a-5p		hsa-miR-548c-5p	PPP3R1		hsa-miR-560	GSK3B
									CSNK1A1	hsa-miR-181c-5p		hsa-miR-548d-5p	PPP3R1		hsa-miR-560	GSK3B
									CSNK1A1	hsa-miR-183-5p		hsa-miR-548ak	PPP3R1		hsa-miR-565	GSK3B
									CSNK1A1	hsa-miR-204-5p		hsa-miR-548bb-5p	PPP3R1		hsa-miR-578	GSK3B
									CSNK1A1	hsa-miR-15b-5p		hsa-miR-548b-5p	PPP3R1		hsa-miR-578	GSK3B
									CSNK1A1	hsa-miR-128		hsa-miR-548au-5p	PPP3R1		hsa-miR-587	GSK3B
									CSNK1A1	hsa-miR-130a-3p		hsa-miR-548o-5p	PPP3R1		hsa-miR-587	GSK3B
									CSNK1A1	hsa-miR-126-3p		hsa-miR-548aq-5p	PPP3R1		hsa-miR-597	GSK3B
									CSNK1A1	hsa-miR-195-5p		hsa-miR-548y	PPP3R1		hsa-miR-597	GSK3B
									CSNK1A1	hsa-miR-301a-3p		hsa-miR-181b-5p	PPP3R1		hsa-miR-604	GSK3B
									CSNK1A1	hsa-miR-130b-3p		hsa-miR-188-3p	PPP3R1		hsa-miR-604	GSK3B
									CSNK1A1	hsa-miR-30e-3p		hsa-miR-181c-5p	PPP3R1		hsa-miR-608	GSK3B
									CSNK1A1	hsa-miR-148b-3p		hsa-miR-4262	PPP3R1		hsa-miR-608	GSK3B
									CSNK1A1	hsa-miR-18b-5p		hsa-miR-181d-5p	PPP3R1		hsa-miR-612	GSK3B
									CSNK1A1	hsa-miR-20b-5p		hsa-miR-5189-3p	PPP3R1		hsa-miR-612	GSK3B
									CSNK1A1	hsa-let-7a-3p		hsa-miR-3908	PPP3R1		hsa-miR-623	GSK3B
									CSNK1A1	hsa-let-7b-3p		hsa-miR-181a-5p	PPP3R1		hsa-miR-637	GSK3B
									CSNK1A1	hsa-let-7d-3p		hsa-miR-4747-5p	PPP3R1		hsa-miR-637	GSK3B
									CSNK1A1	hsa-let-7f-1-3p		hsa-miR-3671	PPP3R1		hsa-miR-646	GSK3B
									CSNK1A1	hsa-miR-19b-1-5p		hsa-miR-3202	PPP3R1		hsa-miR-646	GSK3B
									CSNK1A1	hsa-miR-27a-5p		hsa-miR-2114-5p	PPP3R1		hsa-miR-648	GSK3B
									CSNK1A1	hsa-miR-30d-3p		hsa-miR-5196-5p	PPP3R1		hsa-miR-648	GSK3B
									CSNK1A1	hsa-miR-214-5p		hsa-miR-182-5p	PPP3R1		hsa-miR-649	GSK3B
									CSNK1A1	hsa-miR-23b-5p		hsa-miR-222-3p	PPP3R1		hsa-miR-649	GSK3B
									CSNK1A1	hsa-miR-138-2-3p		hsa-miR-548at-5p	PPP3R1		hsa-miR-661	GSK3B
									CSNK1A1	hsa-miR-185-3p		hsa-miR-6833-3p	PPP3R1		hsa-miR-661	GSK3B
									CSNK1A1	hsa-miR-186-3p		hsa-miR-3944-5p	PPP3R1
									CSNK1A1	hsa-miR-1914-3p		hsa-miR-4272	PPP3R1		hsa-let-7a	DYRK1A
									CSNK1A1	hsa-miR-21-5p		hsa-miR-221-3p	PPP3R1		hsa-let-7a	DYRK1A
									CSNK1A1	hsa-miR-205-5p		hsa-miR-26b-5p	PPP3R1		hsa-let-7b	DYRK1A
									CSNK1A1	hsa-miR-155-5p		hsa-miR-4465	PPP3R1		hsa-let-7b	DYRK1A
									CSNK1A1	hsa-miR-522-5p		hsa-miR-4768-5p	PPP3R1		hsa-let-7c	DYRK1A
									CSNK1A1	hsa-miR-579		hsa-miR-1253	PPP3R1		hsa-let-7c	DYRK1A
									LRRK2	hsa-miR-205-5p		hsa-miR-3151-3p	PPP3R1		hsa-let-7d	DYRK1A
									LRRK2	hsa-miR-335-5p		hsa-miR-26a-5p	PPP3R1		hsa-let-7d	DYRK1A
									LRRK2	hsa-miR-4476		hsa-miR-548f-5p	PPP3R1		hsa-let-7e	DYRK1A
									LRRK2	hsa-miR-149-5p		hsa-miR-548t-5p	PPP3R1		hsa-let-7e	DYRK1A
									LRRK2	hsa-miR-335-5p		hsa-miR-3919	PPP3R1		hsa-let-7f	DYRK1A
									LRRK2	hsa-miR-3127-5p		hsa-miR-548az-5p	PPP3R1		hsa-let-7f	DYRK1A
									LRRK2	hsa-miR-335-5p		hsa-miR-196a-3p	PPP3R1		hsa-let-7g	DYRK1A
									CABIN1	hsa-miR-505-3p		hsa-miR-548g-5p	PPP3R1		hsa-let-7g	DYRK1A
									CABIN1	hsa-miR-766-3p		hsa-miR-1293	PPP3R1		hsa-let-7i	DYRK1A
									CABIN1	hsa-miR-660-3p		hsa-miR-548aj-5p	PPP3R1		hsa-let-7i	DYRK1A
									CABIN1	hsa-miR-15a-5p		hsa-miR-548x-5p	PPP3R1		hsa-miR-101	DYRK1A
									CABIN1	hsa-miR-16-5p		hsa-miR-578	PPP3R1		hsa-miR-101	DYRK1A
									CABIN1	hsa-miR-25-3p		hsa-miR-144-3p	PPP3R1		hsa-miR-106b	DYRK1A
									CABIN1	hsa-miR-320a		hsa-miR-8082	PPP3R1		hsa-miR-106b	DYRK1A
									CABIN1	hsa-miR-151a-3p		hsa-miR-4308	PPP3R1		hsa-miR-124a	DYRK1A
									CABIN1	hsa-miR-1226-3p		hsa-miR-525-5p	PPP3R1		hsa-miR-124a	DYRK1A
									CABIN1	hsa-miR-939		hsa-miR-520a-5p	PPP3R1		hsa-miR-1275	DYRK1A
									CABIN1	hsa-let-7a-5p		hsa-miR-4279	PPP3R1		hsa-miR-1275	DYRK1A
									CABIN1	hsa-miR-27a-3p		hsa-miR-543	PPP3R1		hsa-miR-1275	DYRK1A
									CABIN1	hsa-miR-27b-3p		hsa-miR-188-5p	PPP3R1		hsa-miR-1275	DYRK1A
									CABIN1	hsa-miR-130a-3p		hsa-miR-4756-3p	PPP3R1		hsa-miR-1275	DYRK1A
									CABIN1	hsa-miR-331-3p		hsa-miR-7515	PPP3R1		hsa-miR-134	DYRK1A
									CABIN1	hsa-miR-522-5p		hsa-miR-6866-3p	PPP3R1		hsa-miR-134	DYRK1A
									AKAP5	hsa-miR-26b-5p		hsa-miR-6506-5p	PPP3R1		hsa-miR-134	DYRK1A
									AKAP5	hsa-miR-372		hsa-miR-892a	PPP3R1		hsa-miR-134	DYRK1A
									AKAP5	hsa-miR-140-3p		hsa-miR-619-5p	PPP3R1		hsa-miR-1469	DYRK1A
									AKAP5	hsa-miR-548c-5p		hsa-miR-548g-3p	PPP3R1		hsa-miR-1469	DYRK1A
									AKAP5	hsa-miR-548j		hsa-miR-4468	PPP3R1		hsa-miR-148a	DYRK1A
									AKAP5	hsa-miR-548w		hsa-miR-6847-3p	PPP3R1		hsa-miR-148a	DYRK1A
									AKAP5	hsa-miR-548ak		hsa-miR-499b-5p	PPP3R1		hsa-miR-148b	DYRK1A
									AKAP5	hsa-miR-5680		hsa-miR-3121-5p	PPP3R1		hsa-miR-148b	DYRK1A
									AKAP5	hsa-miR-548o-5p		hsa-miR-4641	PPP3R1		hsa-miR-149*	DYRK1A
									AKAP5	hsa-miR-548am-5p		hsa-miR-885-5p	PPP3R1		hsa-miR-149*	DYRK1A
									AKAP5	hsa-let-7d-5p		hsa-miR-548aa	PPP3R1		hsa-miR-150	DYRK1A
									AKAP5	hsa-miR-15a-5p		hsa-miR-451b	PPP3R1		hsa-miR-150	DYRK1A
									AKAP5	hsa-miR-16-5p		hsa-miR-548ap-3p	PPP3R1		hsa-miR-152	DYRK1A
									AKAP5	hsa-miR-17-5p		hsa-miR-548t-3p	PPP3R1		hsa-miR-152	DYRK1A
									AKAP5	hsa-miR-20a-5p		hsa-miR-4474-3p	PPP3R1		hsa-miR-154	DYRK1A
									AKAP5	hsa-miR-26b-5p		hsa-miR-4428	PPP3R1		hsa-miR-154	DYRK1A
									AKAP5	hsa-miR-29a-3p		hsa-miR-106a-5p	PPP3R1		hsa-miR-154	DYRK1A
									AKAP5	hsa-miR-93-5p		hsa-miR-93-5p	PPP3R1		hsa-miR-154	DYRK1A
									AKAP5	hsa-miR-29b-3p		hsa-miR-1324	PPP3R1		hsa-miR-17-5p	DYRK1A
									AKAP5	hsa-miR-106a-5p		hsa-miR-519d-3p	PPP3R1		hsa-miR-17-5p	DYRK1A
									AKAP5	hsa-miR-181b-5p		hsa-miR-17-5p	PPP3R1		hsa-miR-193a	DYRK1A
									AKAP5	hsa-miR-15b-5p		hsa-miR-20a-5p	PPP3R1		hsa-miR-193a	DYRK1A
									AKAP5	hsa-miR-23b-3p		hsa-miR-526b-3p	PPP3R1		hsa-miR-193b	DYRK1A
									AKAP5	hsa-miR-106b-5p		hsa-miR-106b-5p	PPP3R1		hsa-miR-193b	DYRK1A
									AKAP5	hsa-miR-29c-3p		hsa-miR-20b-5p	PPP3R1		hsa-miR-197	DYRK1A
									AKAP5	hsa-miR-302a-3p		hsa-miR-548ap-5p	PPP3R1		hsa-miR-197	DYRK1A
									AKAP5	hsa-miR-302b-3p		hsa-miR-548p	PPP3R1		hsa-miR-199a	DYRK1A
									AKAP5	hsa-miR-302c-3p		hsa-miR-3064-5p	PPP3R1		hsa-miR-199a	DYRK1A
									AKAP5	hsa-miR-302d-3p		hsa-miR-548j-5p	PPP3R1		hsa-miR-199b	DYRK1A
									AKAP5	hsa-miR-20b-5p		hsa-miR-548i	PPP3R1		hsa-miR-199b	DYRK1A
									AKAP5	hsa-miR-548d-3p		hsa-miR-548as-5p	PPP3R1		hsa-miR-204	DYRK1A
									AKAP5	hsa-miR-10a-3p		hsa-miR-548a-5p	PPP3R1		hsa-miR-204	DYRK1A
									AKAP5	hsa-miR-664-3p		hsa-miR-6504-5p	PPP3R1		hsa-miR-204	DYRK1A
									AKAP5	hsa-miR-133a		hsa-miR-548ab	PPP3R1		hsa-miR-204	DYRK1A
									AKAP5	hsa-miR-181d		hsa-miR-559	PPP3R1		hsa-miR-20b	DYRK1A
									CALM1	hsa-miR-340-5p		hsa-miR-3194-5p	PPP3R1		hsa-miR-20b	DYRK1A
									CALM1	hsa-miR-1202		hsa-miR-539-5p	PPP3R1		hsa-miR-211	DYRK1A
									CALM1	hsa-miR-193a-3p		hsa-miR-1265	PPP3R1		hsa-miR-211	DYRK1A
									CALM1	hsa-miR-19a-5p		hsa-miR-6782-3p	PPP3R1		hsa-miR-211	DYRK1A
									CALM1	hsa-miR-33a-3p		hsa-miR-6875-3p	PPP3R1		hsa-miR-211	DYRK1A
									CALM1	hsa-miR-181a-5p		hsa-miR-5089-5p	PPP3R1		hsa-miR-215	DYRK1A
									CALM1	hsa-miR-5010-3p		hsa-miR-1277-5p	PPP3R1		hsa-miR-215	DYRK1A
									CALM1	hsa-miR-181c-5p		hsa-miR-4422	PPP3R1		hsa-miR-216	DYRK1A
									CALM1	hsa-miR-19b-1-5p		hsa-miR-5003-5p	PPP3R1		hsa-miR-216	DYRK1A
									CALM1	hsa-miR-522-5p		hsa-miR-7150	PPP3R1		hsa-miR-221	DYRK1A
									CALM1	hsa-miR-133a		hsa-miR-383-3p	PPP3R1		hsa-miR-221	DYRK1A
									CALM1	hsa-miR-133b		hsa-miR-4781-3p	PPP3R1		hsa-miR-221	DYRK1A
									CALM1	hsa-miR-450b-5p		hsa-miR-6763-3p	PPP3R1		hsa-miR-221	DYRK1A
									CALM1	hsa-miR-484		hsa-miR-6734-3p	PPP3R1		hsa-miR-222	DYRK1A
									CALM1	hsa-miR-21-3p		hsa-miR-6842-3p	PPP3R1		hsa-miR-222	DYRK1A
									CALM1	hsa-miR-196a-5p		hsa-miR-3126-5p	PPP3R1		hsa-miR-330	DYRK1A
									CALM1	hsa-miR-196b-5p		hsa-miR-6875-5p	PPP3R1		hsa-miR-330	DYRK1A
									CALM1	hsa-miR-338-5p		hsa-miR-548o-3p	PPP3R1		hsa-miR-373*	DYRK1A
									CALM1	hsa-miR-1276		hsa-miR-1323	PPP3R1		hsa-miR-373*	DYRK1A
									CALM1	hsa-miR-374a-5p		hsa-miR-4731-3p	PPP3R1		hsa-miR-376a*	DYRK1A
									CALM1	hsa-miR-34a-3p		hsa-miR-4801	PPP3R1		hsa-miR-376a*	DYRK1A
									CALM1	hsa-let-7i-5p		hsa-miR-4672	PPP3R1		hsa-miR-381	DYRK1A
									CALM1	hsa-miR-3619-5p		hsa-miR-548aj-3p	PPP3R1		hsa-miR-381	DYRK1A
									CALM1	hsa-let-7g-5p		hsa-miR-6818-5p	PPP3R1		hsa-miR-409-5p	DYRK1A
									CALM1	hsa-let-7a-5p		hsa-miR-942-3p	PPP3R1		hsa-miR-409-5p	DYRK1A
									CALM1	hsa-let-7f-5p		hsa-miR-548am-3p	PPP3R1		hsa-miR-411	DYRK1A
									CALM1	hsa-let-7c		hsa-miR-548j-3p	PPP3R1		hsa-miR-411	DYRK1A
									CALM1	hsa-let-7b-5p		hsa-miR-548aq-3p	PPP3R1		hsa-miR-412	DYRK1A
									CALM1	hsa-miR-424-5p		hsa-miR-548x-3p	PPP3R1		hsa-miR-412	DYRK1A
									CALM1	hsa-miR-497-5p		hsa-miR-2467-3p	PPP3R1		hsa-miR-453	DYRK1A
									CALM1	hsa-miR-5581-5p		hsa-miR-548ae-3p	PPP3R1		hsa-miR-453	DYRK1A
									CALM1	hsa-miR-660-5p		hsa-miR-548ah-3p	PPP3R1		hsa-miR-483-5p	DYRK1A
									CALM1	hsa-miR-195-5p		hsa-miR-4715-5p	PPP3R1		hsa-miR-483-5p	DYRK1A
									CALM1	hsa-miR-16-5p		hsa-miR-1271-5p	PPP3R1		hsa-miR-492	DYRK1A
									CALM1	hsa-miR-15b-5p		hsa-miR-6501-3p	PPP3R1		hsa-miR-492	DYRK1A
									CALM1	hsa-miR-423-5p		hsa-miR-5692a	PPP3R1		hsa-miR-492	DYRK1A
									CALM1	hsa-miR-15a-5p		hsa-miR-96-5p	PPP3R1		hsa-miR-492	DYRK1A
									CALM1	hsa-miR-205-5p		hsa-miR-433-3p	PPP3R1		hsa-miR-498	DYRK1A
									CALM1	hsa-miR-1		hsa-miR-582-5p	PPP3R1		hsa-miR-498	DYRK1A
									CALM1	hsa-miR-148a-3p		hsa-miR-1270	PPP3R1		hsa-miR-500	DYRK1A
									CALM1	hsa-miR-16-2-3p		hsa-miR-105-5p	PPP3R1		hsa-miR-500	DYRK1A
									CALM1	hsa-miR-224-5p		hsa-miR-620	PPP3R1		hsa-miR-507	DYRK1A
									CALM1	hsa-miR-571		hsa-miR-3679-3p	PPP3R1		hsa-miR-507	DYRK1A
									CALM1	hsa-miR-495		hsa-miR-7853-5p	PPP3R1		hsa-miR-512-5p	DYRK1A
									CALM1	hsa-miR-212-5p		hsa-miR-3143	PPP3R1		hsa-miR-512-5p	DYRK1A
									CALM1	hsa-miR-22-3p		hsa-miR-548u	PPP3R1		hsa-miR-515-3p	DYRK1A
									CALM1	hsa-miR-148b-3p		hsa-miR-4307	PPP3R1		hsa-miR-515-3p	DYRK1A
									CALM1	hsa-miR-1270		hsa-miR-6083	PPP3R1		hsa-miR-518c*	DYRK1A
									CALM1	hsa-miR-31-5p		hsa-miR-6835-3p	PPP3R1		hsa-miR-518c*	DYRK1A
									CALM1	hsa-miR-5094		hsa-miR-7161-5p	PPP3R1		hsa-miR-522	DYRK1A
									CALM1	hsa-miR-17-3p		hsa-miR-526b-5p	PPP3R1		hsa-miR-522	DYRK1A
									CALM1	hsa-miR-324-3p		hsa-miR-548d-3p	PPP3R1		hsa-miR-542-5p	DYRK1A
									CALM1	hsa-let-7e-5p		hsa-miR-548h-3p	PPP3R1		hsa-miR-542-5p	DYRK1A
									CALM1	hsa-miR-154-3p		hsa-miR-6509-3p	PPP3R1		hsa-miR-544	DYRK1A
									CALM1	hsa-miR-766-3p		hsa-miR-548z	PPP3R1		hsa-miR-544	DYRK1A
									CALM1	hsa-miR-2277-3p		hsa-miR-548ac	PPP3R1		hsa-miR-548a	DYRK1A
									CALM1	hsa-miR-503		hsa-miR-548bb-3p	PPP3R1		hsa-miR-548a	DYRK1A
									CALM1	hsa-miR-487a		hsa-miR-33a-3p	PPP3R1		hsa-miR-567	DYRK1A
									CALM1	hsa-miR-30a-5p		hsa-miR-342-3p	PPP3R1		hsa-miR-567	DYRK1A
									CALM1	hsa-miR-30d-5p		hsa-miR-640	PPP3R1		hsa-miR-576	DYRK1A
									CALM1	hsa-miR-30e-5p		hsa-miR-6748-5p	PPP3R1		hsa-miR-576	DYRK1A
									CALM1	hsa-miR-95		hsa-miR-204-5p	PPP3R1		hsa-miR-587	DYRK1A
									CALM1	hsa-miR-18a-3p		hsa-miR-211-5p	PPP3R1		hsa-miR-587	DYRK1A
									CALM1	hsa-miR-24-2-5p		hsa-miR-1244	PPP3R1		hsa-miR-588	DYRK1A
									CALM1	hsa-miR-505-3p		hsa-miR-4714-3p	PPP3R1		hsa-miR-588	DYRK1A
									CALM1	hsa-miR-320a		hsa-miR-5589-3p	PPP3R1		hsa-miR-592	DYRK1A
									CALM1	hsa-miR-155-3p		hsa-miR-3127-3p	PPP3R1		hsa-miR-592	DYRK1A
									CALM1	hsa-miR-4705		hsa-miR-6756-3p	PPP3R1		hsa-miR-600	DYRK1A
									CALM1	hsa-miR-181c-3p		hsa-miR-510-3p	PPP3R1		hsa-miR-600	DYRK1A
									CALM1	hsa-miR-142-5p		hsa-miR-4717-3p	PPP3R1		hsa-miR-601	DYRK1A
									CALM1	hsa-miR-17-5p		hsa-miR-6757-3p	PPP3R1		hsa-miR-601	DYRK1A
									CALM1	hsa-miR-181a-3p		hsa-miR-892b	PPP3R1		hsa-miR-629	DYRK1A
									CALM1	hsa-miR-26a-5p		hsa-miR-6715b-3p	PPP3R1		hsa-miR-629	DYRK1A
									CALM1	hsa-miR-197-3p		hsa-miR-3163	PPP3R1		hsa-miR-632	DYRK1A
									CALM1	hsa-miR-483-3p		hsa-miR-6074	PPP3R1		hsa-miR-632	DYRK1A
									CALM1	hsa-miR-511		hsa-miR-6847-5p	PPP3R1		hsa-miR-634	DYRK1A
									CALM1	hsa-miR-20a-5p		hsa-miR-7161-3p	PPP3R1		hsa-miR-634	DYRK1A
									CALM1	hsa-miR-24-3p		hsa-miR-181d-3p	PPP3R1		hsa-miR-636	DYRK1A
									CALM1	hsa-miR-106b-5p		hsa-miR-514b-3p	PPP3R1		hsa-miR-636	DYRK1A
									CALM1	hsa-miR-182-5p		hsa-miR-514a-3p	PPP3R1		hsa-miR-641	DYRK1A
									CALM1	hsa-miR-103a-2-5p		hsa-miR-4744	PPP3R1		hsa-miR-641	DYRK1A
									CALM1	hsa-miR-376b					hsa-miR-642	DYRK1A
									CALM1	hsa-miR-598		hsa-miR-4492	PPP3R2		hsa-miR-642	DYRK1A
									CALM1	hsa-miR-1207-5p		hsa-miR-9500	PPP3R2		hsa-miR-645	DYRK1A
									CALM1	hsa-miR-4521		hsa-miR-7158-5p	PPP3R2		hsa-miR-645	DYRK1A
									CALM1	hsa-miR-561-5p		hsa-miR-4498	PPP3R2		hsa-miR-646	DYRK1A
									CALM1	hsa-miR-124-3p		hsa-miR-762	PPP3R2		hsa-miR-646	DYRK1A
									CALM1	hsa-miR-143-3p		hsa-miR-5001-5p	PPP3R2		hsa-miR-663	DYRK1A
									CALM1	hsa-miR-149-5p		hsa-miR-6749-3p	PPP3R2		hsa-miR-663	DYRK1A
									CALM1	hsa-miR-376a-3p		hsa-miR-4483	PPP3R2		hsa-miR-767-3p	DYRK1A
									CALM1	hsa-miR-378a-5p		hsa-miR-3179	PPP3R2		hsa-miR-767-3p	DYRK1A
									CALM1	hsa-miR-517-5p		hsa-miR-5187-3p	PPP3R2		hsa-miR-923	DYRK1A
									CALM1	hsa-miR-23b-5p		hsa-miR-4775	PPP3R2		hsa-miR-923	DYRK1A
									CALM1	hsa-miR-1185-5p		hsa-miR-3064-3p	PPP3R2		hsa-miR-98	DYRK1A
									CALM1	hsa-miR-2355-5p		hsa-miR-6756-3p	PPP3R2		hsa-miR-98	DYRK1A
									CALM1	hsa-miR-3691-5p		hsa-miR-3120-3p	PPP3R2
									CALM1	hsa-miR-489		hsa-miR-3127-3p	PPP3R2		hsa-let-7b	HOMER2
									CALM1	hsa-miR-342-3p		hsa-miR-4317	PPP3R2		hsa-let-7b	HOMER2
									STIM1	hsa-miR-769-3p		hsa-miR-4255	PPP3R2		hsa-let-7c	HOMER2
									STIM1	hsa-miR-17-3p		hsa-miR-4286	PPP3R2		hsa-let-7c	HOMER2
									STIM1	hsa-miR-34a-5p		hsa-miR-545-3p	PPP3R2		hsa-let-7d	HOMER2
									STIM1	hsa-miR-769-3p		hsa-miR-4443	PPP3R2		hsa-let-7d	HOMER2
									STIM1	hsa-miR-939		hsa-miR-4677-3p	PPP3R2		hsa-let-7e	HOMER2
									STIM1	hsa-miR-548e		hsa-miR-6124	PPP3R2		hsa-let-7e	HOMER2
									STIM1	hsa-miR-548f		hsa-miR-2116-3p	PPP3R2		hsa-miR-122a	HOMER2
									STIM1	hsa-miR-2110		hsa-miR-548l	PPP3R2		hsa-miR-122a	HOMER2
									STIM1	hsa-miR-4517		hsa-miR-4441	PPP3R2		hsa-miR-1275	HOMER2
									STIM1	hsa-miR-766-5p		hsa-miR-571	PPP3R2		hsa-miR-1275	HOMER2
									STIM1	hsa-let-7d-5p		hsa-miR-4271	PPP3R2		hsa-miR-130b	HOMER2
									STIM1	hsa-miR-17-3p		hsa-miR-4725-3p	PPP3R2		hsa-miR-130b	HOMER2
									STIM1	hsa-miR-146a-5p		hsa-miR-6841-5p	PPP3R2		hsa-miR-134	HOMER2
									STIM1	hsa-miR-146b-5p		hsa-miR-6780b-5p	PPP3R2		hsa-miR-138	HOMER2
									STIM1	hsa-miR-500a-3p		hsa-miR-3973	PPP3R2		hsa-miR-138	HOMER2
									STIM1	hsa-miR-548d-3p		hsa-miR-6770-5p	PPP3R2		hsa-miR-138	HOMER2
									STIM1	hsa-miR-15a-3p		hsa-miR-4481	PPP3R2		hsa-miR-141	HOMER2
									STIM1	hsa-miR-505-5p		hsa-miR-488-5p	PPP3R2		hsa-miR-141	HOMER2
									STIM1	hsa-miR-589-5p		hsa-miR-92a-1-5p	PPP3R2		hsa-miR-145	HOMER2
									STIM1	hsa-miR-103a-2-5p		hsa-miR-4511	PPP3R2		hsa-miR-145	HOMER2
									STIM1	hsa-miR-3913-5p		hsa-miR-6796-5p	PPP3R2		hsa-miR-145	HOMER2
									STIM1	hsa-miR-125a-3p		hsa-miR-4691-5p	PPP3R2		hsa-miR-148a	HOMER2
									STIM1	hsa-miR-93-3p		hsa-miR-6792-3p	PPP3R2		hsa-miR-148a	HOMER2
									STIM1	hsa-let-7b-5p		hsa-miR-3620-5p	PPP3R2		hsa-miR-148b	HOMER2
									STIM1	hsa-miR-155-5p		hsa-miR-1587	PPP3R2		hsa-miR-148b	HOMER2
												hsa-miR-3183	PPP3R2		hsa-miR-149*	HOMER2
												hsa-miR-145-5p	PPP3R2		hsa-miR-149*	HOMER2
												hsa-miR-7111-3p	PPP3R2		hsa-miR-152	HOMER2
												hsa-miR-4741	PPP3R2		hsa-miR-152	HOMER2
												hsa-miR-4723-3p	PPP3R2		hsa-miR-15a	HOMER2
												hsa-miR-4675	PPP3R2		hsa-miR-15a	HOMER2
												hsa-miR-6769b-3p	PPP3R2		hsa-miR-15b	HOMER2
												hsa-miR-5195-3p	PPP3R2		hsa-miR-15b	HOMER2
												hsa-miR-548at-5p	PPP3R2		hsa-miR-181d	HOMER2
												hsa-miR-187-5p	PPP3R2		hsa-miR-181d	HOMER2
												hsa-miR-6853-5p	PPP3R2		hsa-miR-184	HOMER2
												hsa-miR-6794-5p	PPP3R2		hsa-miR-188	HOMER2
												hsa-miR-4716-3p	PPP3R2		hsa-miR-188	HOMER2
												hsa-miR-4490	PPP3R2		hsa-miR-18a*	HOMER2
												hsa-miR-8062	PPP3R2		hsa-miR-18a*	HOMER2
												hsa-miR-197-3p	PPP3R2		hsa-miR-18a*	HOMER2
												hsa-let-7a-3p	PPP3R2		hsa-miR-191*	HOMER2
												hsa-let-7f-1-3p	PPP3R2		hsa-miR-191*	HOMER2
												hsa-let-7b-3p	PPP3R2		hsa-miR-193a	HOMER2
												hsa-miR-382-5p	PPP3R2		hsa-miR-198	HOMER2
												hsa-miR-98-3p	PPP3R2		hsa-miR-198	HOMER2
												hsa-miR-590-3p	PPP3R2		hsa-miR-199a*	HOMER2
												hsa-miR-3168	PPP3R2		hsa-miR-199a*	HOMER2
												hsa-miR-302e	PPP3R2		hsa-miR-200a	HOMER2
												hsa-miR-491-5p	PPP3R2		hsa-miR-200a	HOMER2
												hsa-miR-7151-3p	PPP3R2		hsa-miR-20b	HOMER2
												hsa-miR-6856-5p	PPP3R2		hsa-miR-210	HOMER2
												hsa-miR-5095	PPP3R2		hsa-miR-210	HOMER2
												hsa-miR-1293	PPP3R2		hsa-miR-217	HOMER2
												hsa-miR-6758-5p	PPP3R2		hsa-miR-217	HOMER2
												hsa-miR-6869-5p	PPP3R2		hsa-miR-27a	HOMER2
												hsa-miR-4430	PPP3R2		hsa-miR-27a	HOMER2
												hsa-miR-548aq-5p	PPP3R2		hsa-miR-27b	HOMER2
												hsa-miR-3652	PPP3R2		hsa-miR-27b	HOMER2
												hsa-miR-1279	PPP3R2		hsa-miR-296	HOMER2
												hsa-miR-548y	PPP3R2		hsa-miR-296	HOMER2
															hsa-miR-29a	HOMER2
												hsa-miR-6508-5p	RCAN1		hsa-miR-29a	HOMER2
												hsa-miR-8067	RCAN1		hsa-miR-30a-3p	HOMER2
												hsa-miR-4303	RCAN1		hsa-miR-30a-3p	HOMER2
												hsa-miR-4753-5p	RCAN1		hsa-miR-30a-3p	HOMER2
												hsa-miR-6819-3p	RCAN1		hsa-miR-30a-5p	HOMER2
												hsa-miR-6877-3p	RCAN1		hsa-miR-30a-5p	HOMER2
												hsa-miR-513a-5p	RCAN1		hsa-miR-30b	HOMER2
												hsa-miR-330-3p	RCAN1		hsa-miR-30b	HOMER2
												hsa-miR-1306-5p	RCAN1		hsa-miR-30c	HOMER2
												hsa-miR-3926	RCAN1		hsa-miR-30c	HOMER2
												hsa-miR-1298-3p	RCAN1		hsa-miR-30d	HOMER2
												hsa-miR-4276	RCAN1		hsa-miR-30d	HOMER2
												hsa-miR-4314	RCAN1		hsa-miR-30e-3p	HOMER2
												hsa-miR-204-3p	RCAN1		hsa-miR-30e-3p	HOMER2
												hsa-miR-4646-5p	RCAN1		hsa-miR-30e-3p	HOMER2
												hsa-miR-107	RCAN1		hsa-miR-30e-3p	HOMER2
												hsa-miR-103a-3p	RCAN1		hsa-miR-30e-5p	HOMER2
												hsa-miR-4301	RCAN1		hsa-miR-30e-5p	HOMER2
												hsa-miR-6739-5p	RCAN1		hsa-miR-320	HOMER2
												hsa-miR-6733-5p	RCAN1		hsa-miR-320	HOMER2
												hsa-miR-3153	RCAN1		hsa-miR-324-3p	HOMER2
												hsa-miR-3614-5p	RCAN1		hsa-miR-324-3p	HOMER2
												hsa-miR-3944-5p	RCAN1		hsa-miR-324-5p	HOMER2
												hsa-miR-155-3p	RCAN1		hsa-miR-324-5p	HOMER2
												hsa-miR-6834-5p	RCAN1		hsa-miR-326	HOMER2
												hsa-miR-6784-3p	RCAN1		hsa-miR-326	HOMER2
												hsa-miR-6862-3p	RCAN1		hsa-miR-328	HOMER2
												hsa-miR-4671-5p	RCAN1		hsa-miR-328	HOMER2
												hsa-miR-6776-3p	RCAN1		hsa-miR-331	HOMER2
												hsa-miR-4422	RCAN1		hsa-miR-331	HOMER2
												hsa-miR-708-3p	RCAN1		hsa-miR-339	HOMER2
												hsa-miR-527	RCAN1		hsa-miR-339	HOMER2
												hsa-miR-518a-5p	RCAN1		hsa-miR-340	HOMER2
												hsa-miR-3177-5p	RCAN1		hsa-miR-340	HOMER2
												hsa-miR-219a-2-3p	RCAN1		hsa-miR-346	HOMER2
												hsa-let-7d-3p	RCAN1		hsa-miR-346	HOMER2
												hsa-miR-3692-3p	RCAN1		hsa-miR-34c	HOMER2
															hsa-miR-34c	HOMER2
												hsa-miR-5011-5p	GSK3B		hsa-miR-361	HOMER2
												hsa-miR-3662	GSK3B		hsa-miR-361	HOMER2
												hsa-miR-190a-3p	GSK3B		hsa-miR-363*	HOMER2
												hsa-miR-1297	GSK3B		hsa-miR-363*	HOMER2
												hsa-miR-4659b-3p	GSK3B		hsa-miR-368	HOMER2
												hsa-miR-3646	GSK3B		hsa-miR-368	HOMER2
												hsa-miR-4306	GSK3B		hsa-miR-370	HOMER2
												hsa-miR-4659a-3p	GSK3B		hsa-miR-370	HOMER2
												hsa-miR-8085	GSK3B		hsa-miR-371	HOMER2
												hsa-miR-6731-5p	GSK3B		hsa-miR-371	HOMER2
												hsa-miR-5087	GSK3B		hsa-miR-379	HOMER2
												hsa-miR-26a-5p	GSK3B		hsa-miR-379	HOMER2
												hsa-miR-4426	GSK3B		hsa-miR-379	HOMER2
												hsa-miR-4465	GSK3B		hsa-miR-409-3p	HOMER2
												hsa-miR-5582-3p	GSK3B		hsa-miR-409-3p	HOMER2
												hsa-miR-5584-5p	GSK3B		hsa-miR-409-3p	HOMER2
												hsa-miR-26b-5p	GSK3B		hsa-miR-422b	HOMER2
												hsa-miR-8485	GSK3B		hsa-miR-422b	HOMER2
												hsa-miR-5681a	GSK3B		hsa-miR-431	HOMER2
												hsa-miR-4775	GSK3B		hsa-miR-431	HOMER2
												hsa-miR-4668-5p	GSK3B		hsa-miR-432*	HOMER2
												hsa-miR-2682-5p	GSK3B		hsa-miR-448	HOMER2
												hsa-miR-449c-5p	GSK3B		hsa-miR-448	HOMER2
												hsa-miR-6883-5p	GSK3B		hsa-miR-455	HOMER2
												hsa-miR-149-3p	GSK3B		hsa-miR-455	HOMER2
												hsa-miR-34b-5p	GSK3B		hsa-miR-486	HOMER2
												hsa-miR-6785-5p	GSK3B		hsa-miR-486	HOMER2
												hsa-miR-4728-5p	GSK3B		hsa-miR-488	HOMER2
												hsa-miR-624-3p	GSK3B		hsa-miR-500	HOMER2
												hsa-miR-4318	GSK3B		hsa-miR-500	HOMER2
												hsa-miR-1249-5p	GSK3B		hsa-miR-503	HOMER2
												hsa-miR-5095	GSK3B		hsa-miR-503	HOMER2
												hsa-miR-7151-3p	GSK3B		hsa-miR-506	HOMER2
												hsa-miR-199b-5p	GSK3B		hsa-miR-506	HOMER2
												hsa-miR-651-3p	GSK3B		hsa-miR-508	HOMER2
												hsa-miR-199a-5p	GSK3B		hsa-miR-508	HOMER2
												hsa-miR-3148	GSK3B		hsa-miR-510	HOMER2
												hsa-miR-3175	GSK3B		hsa-miR-512-3p	HOMER2
												hsa-miR-4742-5p	GSK3B		hsa-miR-512-3p	HOMER2
												hsa-miR-561-3p	GSK3B		hsa-miR-515-3p	HOMER2
												hsa-miR-4662b	GSK3B		hsa-miR-515-3p	HOMER2
												hsa-miR-580-3p	GSK3B		hsa-miR-519a	HOMER2
												hsa-miR-4647	GSK3B		hsa-miR-519a	HOMER2
												hsa-miR-4644	GSK3B		hsa-miR-519b	HOMER2
												hsa-miR-101-3p	GSK3B		hsa-miR-519b	HOMER2
												hsa-miR-185-5p	GSK3B		hsa-miR-519c	HOMER2
												hsa-miR-6797-5p	GSK3B		hsa-miR-519c	HOMER2
												hsa-miR-3145-3p	GSK3B		hsa-miR-519e	HOMER2
												hsa-miR-4704-3p	GSK3B		hsa-miR-519e	HOMER2
												hsa-miR-4291	GSK3B		hsa-miR-520a*	HOMER2
												hsa-miR-550b-2-5p	GSK3B		hsa-miR-520a*	HOMER2
												hsa-miR-95-5p	GSK3B		hsa-miR-523	HOMER2
												hsa-miR-3691-3p	GSK3B		hsa-miR-525	HOMER2
												hsa-miR-4447	GSK3B		hsa-miR-525	HOMER2
												hsa-miR-1910-5p	GSK3B		hsa-miR-532	HOMER2
												hsa-miR-7-2-3p	GSK3B		hsa-miR-532	HOMER2
												hsa-miR-7-1-3p	GSK3B		hsa-miR-544	HOMER2
												hsa-miR-6782-3p	GSK3B		hsa-miR-544	HOMER2
												hsa-miR-3613-3p	GSK3B		hsa-miR-551a	HOMER2
												hsa-miR-3941	GSK3B		hsa-miR-551a	HOMER2
												hsa-miR-7976	GSK3B		hsa-miR-551b	HOMER2
												hsa-miR-6742-3p	GSK3B		hsa-miR-551b	HOMER2
												hsa-miR-4795-3p	GSK3B		hsa-miR-552	HOMER2
												hsa-miR-6778-5p	GSK3B		hsa-miR-552	HOMER2
												hsa-miR-511-3p	GSK3B		hsa-miR-560	HOMER2
												hsa-miR-5697	GSK3B		hsa-miR-560	HOMER2
												hsa-miR-1233-5p	GSK3B		hsa-miR-564	HOMER2
												hsa-miR-5004-3p	GSK3B		hsa-miR-564	HOMER2
												hsa-miR-7110-3p	GSK3B		hsa-miR-566	HOMER2
												hsa-miR-3158-3p	GSK3B		hsa-miR-566	HOMER2
												hsa-miR-3202	GSK3B		hsa-miR-574	HOMER2
												hsa-miR-6852-3p	GSK3B		hsa-miR-574	HOMER2
												hsa-miR-6796-5p	GSK3B		hsa-miR-582	HOMER2
												hsa-miR-98-3p	GSK3B		hsa-miR-588	HOMER2
												hsa-miR-3924	GSK3B		hsa-miR-588	HOMER2
												hsa-let-7a-3p	GSK3B		hsa-miR-593	HOMER2
												hsa-miR-6716-5p	GSK3B		hsa-miR-593	HOMER2
												hsa-let-7f-1-3p	GSK3B		hsa-miR-593	HOMER2
												hsa-miR-3714	GSK3B		hsa-miR-598	HOMER2
												hsa-miR-3677-3p	GSK3B		hsa-miR-598	HOMER2
												hsa-let-7b-3p	GSK3B		hsa-miR-600	HOMER2
												hsa-miR-6791-5p	GSK3B		hsa-miR-600	HOMER2
												hsa-miR-4292	GSK3B		hsa-miR-601	HOMER2
												hsa-miR-548an	GSK3B		hsa-miR-601	HOMER2
												hsa-miR-6885-3p	GSK3B		hsa-miR-602	HOMER2
												hsa-miR-548x-3p	GSK3B		hsa-miR-602	HOMER2
												hsa-miR-4779	GSK3B		hsa-miR-604	HOMER2
												hsa-miR-548aj-3p	GSK3B		hsa-miR-604	HOMER2
												hsa-miR-548ae-3p	GSK3B		hsa-miR-608	HOMER2
												hsa-miR-4777-5p	GSK3B		hsa-miR-608	HOMER2
												hsa-miR-548aq-3p	GSK3B		hsa-miR-612	HOMER2
												hsa-miR-4802-3p	GSK3B		hsa-miR-613	HOMER2
												hsa-miR-4267	GSK3B		hsa-miR-613	HOMER2
												hsa-miR-507	GSK3B		hsa-miR-613	HOMER2
												hsa-miR-7155-3p	GSK3B		hsa-miR-615	HOMER2
												hsa-miR-557	GSK3B		hsa-miR-615	HOMER2
												hsa-miR-10b-3p	GSK3B		hsa-miR-621	HOMER2
												hsa-miR-6865-5p	GSK3B		hsa-miR-624	HOMER2
												hsa-miR-6815-5p	GSK3B		hsa-miR-624	HOMER2
												hsa-miR-6771-3p	GSK3B		hsa-miR-626	HOMER2
												hsa-miR-7111-3p	GSK3B		hsa-miR-626	HOMER2
												hsa-miR-9500	GSK3B		hsa-miR-636	HOMER2
												hsa-miR-6852-5p	GSK3B		hsa-miR-636	HOMER2
												hsa-miR-3689b-3p	GSK3B		hsa-miR-637	HOMER2
												hsa-miR-3689c	GSK3B		hsa-miR-637	HOMER2
												hsa-miR-3689a-3p	GSK3B		hsa-miR-637	HOMER2
												hsa-miR-3133	GSK3B		hsa-miR-638	HOMER2
												hsa-miR-6780a-5p	GSK3B		hsa-miR-639	HOMER2
												hsa-miR-3529-3p	GSK3B		hsa-miR-639	HOMER2
												hsa-miR-30b-3p	GSK3B		hsa-miR-641	HOMER2
												hsa-miR-6838-3p	GSK3B		hsa-miR-641	HOMER2
												hsa-miR-5186	GSK3B		hsa-miR-644	HOMER2
												hsa-miR-4440	GSK3B		hsa-miR-644	HOMER2
												hsa-miR-6779-5p	GSK3B		hsa-miR-648	HOMER2
												hsa-miR-3166	GSK3B		hsa-miR-648	HOMER2
												hsa-miR-1273h-5p	GSK3B		hsa-miR-650	HOMER2
												hsa-miR-5001-3p	GSK3B		hsa-miR-654	HOMER2
												hsa-miR-7855-5p	GSK3B		hsa-miR-654	HOMER2
												hsa-miR-4472	GSK3B		hsa-miR-658	HOMER2
												hsa-miR-23a-3p	GSK3B		hsa-miR-658	HOMER2
												hsa-miR-23c	GSK3B		hsa-miR-659	HOMER2
												hsa-miR-1914-5p	GSK3B		hsa-miR-659	HOMER2
												hsa-miR-130a-5p	GSK3B		hsa-miR-661	HOMER2
												hsa-miR-23b-3p	GSK3B		hsa-miR-663	HOMER2
												hsa-miR-4469	GSK3B		hsa-miR-663	HOMER2
												hsa-miR-4710	GSK3B		hsa-miR-663	HOMER2
												hsa-miR-4288	GSK3B		hsa-miR-663	HOMER2
												hsa-miR-27b-3p	GSK3B		hsa-miR-671	HOMER2
												hsa-miR-30c-1-3p	GSK3B		hsa-miR-671	HOMER2
												hsa-miR-135a-5p	GSK3B		hsa-miR-675	HOMER2
												hsa-miR-27a-3p	GSK3B		hsa-miR-765	HOMER2
												hsa-miR-135b-5p	GSK3B		hsa-miR-765	HOMER2
												hsa-miR-5003-3p	GSK3B		hsa-miR-766	HOMER2
												hsa-miR-30c-2-3p	GSK3B		hsa-miR-766	HOMER2
												hsa-miR-4441	GSK3B		hsa-miR-768-3p	HOMER2
												hsa-miR-6788-5p	GSK3B		hsa-miR-768-3p	HOMER2
												hsa-miR-450b-5p	GSK3B		hsa-miR-769-3p	HOMER2
												hsa-miR-6890-3p	GSK3B		hsa-miR-769-3p	HOMER2
												hsa-miR-216a-3p	GSK3B		hsa-miR-769-5p	HOMER2
												hsa-miR-128-3p	GSK3B		hsa-miR-769-5p	HOMER2
												hsa-miR-3681-3p	GSK3B		hsa-miR-770-5p	HOMER2
												hsa-miR-4695-3p	GSK3B		hsa-miR-770-5p	HOMER2
												hsa-miR-6857-3p	GSK3B		hsa-miR-801	HOMER2
												hsa-miR-766-5p	GSK3B		hsa-miR-93	HOMER2
												hsa-miR-3124-3p	GSK3B		hsa-miR-93	HOMER2
												hsa-miR-5688	GSK3B		hsa-miR-96	HOMER2
												hsa-miR-4422	GSK3B		hsa-miR-96	HOMER2
												hsa-miR-6513-3p	GSK3B
												hsa-miR-6083	GSK3B		hsa-miR-103	ITPR1
												hsa-miR-4789-5p	GSK3B		hsa-miR-103	ITPR1
												hsa-miR-6858-5p	GSK3B		hsa-miR-105	ITPR1
												hsa-miR-3616-3p	GSK3B		hsa-miR-107	ITPR1
												hsa-miR-4771	GSK3B		hsa-miR-107	ITPR1
												hsa-miR-4689	GSK3B		hsa-miR-130a	ITPR1
												hsa-miR-8079	GSK3B		hsa-miR-130a	ITPR1
												hsa-miR-4666a-3p	GSK3B		hsa-miR-130b	ITPR1
												hsa-miR-1245a	GSK3B		hsa-miR-130b	ITPR1
												hsa-miR-4797-5p	GSK3B		hsa-miR-144	ITPR1
												hsa-miR-376c-3p	GSK3B		hsa-miR-144	ITPR1
												hsa-miR-3909	GSK3B		hsa-miR-144	ITPR1
												hsa-miR-4419a	GSK3B		hsa-miR-145	ITPR1
												hsa-miR-590-3p	GSK3B		hsa-miR-145	ITPR1
												hsa-miR-374b-5p	GSK3B		hsa-miR-148a	ITPR1
												hsa-miR-1207-3p	GSK3B		hsa-miR-148a	ITPR1
												hsa-miR-374a-5p	GSK3B		hsa-miR-152	ITPR1
												hsa-miR-1289	GSK3B		hsa-miR-152	ITPR1
												hsa-miR-4717-3p	GSK3B		hsa-miR-153	ITPR1
												hsa-miR-6853-3p	GSK3B		hsa-miR-153	ITPR1
												hsa-miR-28-5p	GSK3B		hsa-miR-15a	ITPR1
												hsa-miR-539-3p	GSK3B		hsa-miR-15a	ITPR1
												hsa-miR-410-3p	GSK3B		hsa-miR-15a	ITPR1
												hsa-miR-6809-3p	GSK3B		hsa-miR-15b	ITPR1
												hsa-miR-5002-5p	GSK3B		hsa-miR-15b	ITPR1
												hsa-miR-3139	GSK3B		hsa-miR-15b	ITPR1
												hsa-miR-6878-5p	GSK3B		hsa-miR-16	ITPR1
												hsa-miR-708-5p	GSK3B		hsa-miR-16	ITPR1
												hsa-miR-485-3p	GSK3B		hsa-miR-186	ITPR1
												hsa-miR-3667-5p	GSK3B		hsa-miR-188	ITPR1
												hsa-miR-527	GSK3B		hsa-miR-188	ITPR1
												hsa-miR-6077	GSK3B		hsa-miR-19a	ITPR1
												hsa-miR-518a-5p	GSK3B		hsa-miR-19a	ITPR1
												hsa-miR-8077	GSK3B		hsa-miR-19a	ITPR1
												hsa-miR-4253	GSK3B		hsa-miR-19b	ITPR1
												hsa-miR-6862-5p	GSK3B		hsa-miR-19b	ITPR1
												hsa-miR-4499	GSK3B		hsa-miR-19b	ITPR1
												hsa-miR-568	GSK3B		hsa-miR-20b	ITPR1
												hsa-miR-29a-5p	GSK3B		hsa-miR-20b	ITPR1
												hsa-miR-4495	GSK3B		hsa-miR-211	ITPR1
												hsa-miR-4638-3p	GSK3B		hsa-miR-211	ITPR1
												hsa-miR-4729	GSK3B		hsa-miR-211	ITPR1
												hsa-miR-873-3p	GSK3B		hsa-miR-220	ITPR1
												hsa-miR-6733-5p	GSK3B		hsa-miR-220	ITPR1
												hsa-miR-9-5p	GSK3B		hsa-miR-26b	ITPR1
												hsa-miR-29a-3p	GSK3B		hsa-miR-26b	ITPR1
												hsa-miR-3153	GSK3B		hsa-miR-29b	ITPR1
												hsa-miR-642b-5p	GSK3B		hsa-miR-29b	ITPR1
												hsa-miR-6739-5p	GSK3B		hsa-miR-29c	ITPR1
												hsa-miR-29c-3p	GSK3B		hsa-miR-29c	ITPR1
												hsa-miR-29b-3p	GSK3B		hsa-miR-32	ITPR1
												hsa-miR-570-3p	GSK3B		hsa-miR-32	ITPR1
												hsa-miR-6514-3p	GSK3B		hsa-miR-324-5p	ITPR1
												hsa-miR-548c-3p	GSK3B		hsa-miR-324-5p	ITPR1
												hsa-miR-655-5p	GSK3B		hsa-miR-326	ITPR1
												hsa-miR-548am-3p	GSK3B		hsa-miR-326	ITPR1
												hsa-miR-491-5p	GSK3B		hsa-miR-329	ITPR1
												hsa-miR-345-3p	GSK3B		hsa-miR-329	ITPR1
												hsa-miR-548ah-3p	GSK3B		hsa-miR-329	ITPR1
												hsa-miR-891a-3p	GSK3B		hsa-miR-331	ITPR1
												hsa-miR-548j-3p	GSK3B		hsa-miR-331	ITPR1
												hsa-miR-6783-3p	GSK3B		hsa-miR-338	ITPR1
												hsa-miR-1343-3p	GSK3B		hsa-miR-338	ITPR1
												hsa-miR-4739	GSK3B		hsa-miR-34c	ITPR1
												hsa-miR-4420	GSK3B		hsa-miR-34c	ITPR1
												hsa-miR-1321	GSK3B		hsa-miR-363	ITPR1
												hsa-miR-6718-5p	GSK3B		hsa-miR-363	ITPR1
												hsa-miR-224-5p	GSK3B		hsa-miR-363*	ITPR1
												hsa-miR-203b-5p	GSK3B		hsa-miR-363*	ITPR1
												hsa-miR-141-5p	GSK3B		hsa-miR-373	ITPR1
												hsa-miR-2110	GSK3B		hsa-miR-373	ITPR1
												hsa-miR-181b-3p	GSK3B		hsa-miR-424	ITPR1
												hsa-miR-4756-5p	GSK3B		hsa-miR-424	ITPR1
												hsa-miR-181b-2-3p	GSK3B		hsa-miR-424	ITPR1
												hsa-miR-922	GSK3B		hsa-miR-449	ITPR1
												hsa-miR-548e-5p	GSK3B		hsa-miR-449	ITPR1
												hsa-miR-3653-5p	GSK3B		hsa-miR-454-3p	ITPR1
												hsa-miR-3136-3p	GSK3B		hsa-miR-454-3p	ITPR1
												hsa-miR-3120-5p	GSK3B		hsa-miR-495	ITPR1
												hsa-miR-548l	GSK3B		hsa-miR-495	ITPR1
												hsa-miR-4639-5p	GSK3B		hsa-miR-497	ITPR1
												hsa-miR-582-3p	GSK3B		hsa-miR-497	ITPR1
												hsa-miR-3147	GSK3B		hsa-miR-497	ITPR1
												hsa-miR-4455	GSK3B		hsa-miR-512-5p	ITPR1
												hsa-miR-125b-2-3p	GSK3B		hsa-miR-512-5p	ITPR1
												hsa-miR-3678-3p	GSK3B		hsa-miR-515-3p	ITPR1
												hsa-miR-208b-5p	GSK3B		hsa-miR-515-3p	ITPR1
												hsa-miR-208a-5p	GSK3B		hsa-miR-517a	ITPR1
												hsa-miR-6500-3p	GSK3B		hsa-miR-517a	ITPR1
												hsa-miR-4722-5p	GSK3B		hsa-miR-517b	ITPR1
												hsa-miR-1183	GSK3B		hsa-miR-517b	ITPR1
												hsa-miR-6808-5p	GSK3B		hsa-miR-517c	ITPR1
												hsa-miR-2114-5p	GSK3B		hsa-miR-517c	ITPR1
												hsa-miR-940	GSK3B		hsa-miR-518b	ITPR1
												hsa-miR-7152-5p	GSK3B		hsa-miR-518b	ITPR1
												hsa-miR-6893-5p	GSK3B		hsa-miR-518c	ITPR1
												hsa-let-7g-3p	GSK3B		hsa-miR-518c	ITPR1
												hsa-miR-1285-5p	GSK3B		hsa-miR-518d	ITPR1
												hsa-let-7a-2-3p	GSK3B		hsa-miR-518d	ITPR1
															hsa-miR-519a	ITPR1
												hsa-miR-298	DYRK1A		hsa-miR-519a	ITPR1
												hsa-miR-548e-5p	DYRK1A		hsa-miR-519a	ITPR1
												hsa-miR-4316	DYRK1A		hsa-miR-519a	ITPR1
												hsa-miR-1251-3p	DYRK1A		hsa-miR-519a	ITPR1
												hsa-miR-4691-3p	DYRK1A		hsa-miR-519b	ITPR1
												hsa-miR-4310	DYRK1A		hsa-miR-519b	ITPR1
												hsa-miR-3613-3p	DYRK1A		hsa-miR-519b	ITPR1
												hsa-miR-3690	DYRK1A		hsa-miR-519c	ITPR1
												hsa-miR-4715-5p	DYRK1A		hsa-miR-519c	ITPR1
												hsa-miR-150-3p	DYRK1A		hsa-miR-519c	ITPR1
												hsa-miR-4753-5p	DYRK1A		hsa-miR-519d	ITPR1
												hsa-miR-4524b-3p	DYRK1A		hsa-miR-519d	ITPR1
												hsa-miR-491-3p	DYRK1A		hsa-miR-519e	ITPR1
												hsa-miR-548ao-3p	DYRK1A		hsa-miR-519e	ITPR1
												hsa-miR-154-3p	DYRK1A		hsa-miR-520a	ITPR1
												hsa-miR-487a-3p	DYRK1A		hsa-miR-520a	ITPR1
												hsa-miR-6870-5p	DYRK1A		hsa-miR-520b	ITPR1
												hsa-miR-1275	DYRK1A		hsa-miR-520b	ITPR1
												hsa-miR-4268	DYRK1A		hsa-miR-520c	ITPR1
												hsa-miR-5698	DYRK1A		hsa-miR-520c	ITPR1
												hsa-miR-4723-5p	DYRK1A		hsa-miR-520d	ITPR1
												hsa-miR-7111-5p	DYRK1A		hsa-miR-520d	ITPR1
												hsa-miR-4422	DYRK1A		hsa-miR-520e	ITPR1
												hsa-miR-4503	DYRK1A		hsa-miR-520e	ITPR1
												hsa-miR-5004-5p	DYRK1A		hsa-miR-520f	ITPR1
												hsa-miR-4426	DYRK1A		hsa-miR-520f	ITPR1
												hsa-miR-1227-5p	DYRK1A		hsa-miR-520g	ITPR1
												hsa-miR-492	DYRK1A		hsa-miR-520g	ITPR1
												hsa-miR-548as-3p	DYRK1A		hsa-miR-520h	ITPR1
												hsa-miR-8485	DYRK1A		hsa-miR-520h	ITPR1
												hsa-miR-548z	DYRK1A		hsa-miR-521	ITPR1
												hsa-miR-548ac	DYRK1A		hsa-miR-521	ITPR1
												hsa-miR-548h-3p	DYRK1A		hsa-miR-524	ITPR1
												hsa-miR-548d-3p	DYRK1A		hsa-miR-524	ITPR1
												hsa-miR-548bb-3p	DYRK1A		hsa-miR-524*	ITPR1
												hsa-miR-877-5p	DYRK1A		hsa-miR-525	ITPR1
												hsa-miR-4288	DYRK1A		hsa-miR-525	ITPR1
												hsa-miR-3148	DYRK1A		hsa-miR-525*	ITPR1
												hsa-miR-20a-3p	DYRK1A		hsa-miR-525*	ITPR1
												hsa-miR-4321	DYRK1A		hsa-miR-526b*	ITPR1
												hsa-miR-7157-5p	DYRK1A		hsa-miR-526b*	ITPR1
												hsa-miR-507	DYRK1A		hsa-miR-552	ITPR1
												hsa-miR-1908-5p	DYRK1A		hsa-miR-552	ITPR1
												hsa-miR-3688-5p	DYRK1A		hsa-miR-562	ITPR1
												hsa-miR-6787-5p	DYRK1A		hsa-miR-564	ITPR1
												hsa-miR-663a	DYRK1A		hsa-miR-564	ITPR1
												hsa-miR-4325	DYRK1A		hsa-miR-574-5p	ITPR1
												hsa-miR-1260b	DYRK1A		hsa-miR-576	ITPR1
												hsa-miR-6165	DYRK1A		hsa-miR-576	ITPR1
												hsa-miR-1260a	DYRK1A		hsa-miR-583	ITPR1
												hsa-miR-4272	DYRK1A		hsa-miR-583	ITPR1
												hsa-miR-892c-3p	DYRK1A		hsa-miR-589	ITPR1
												hsa-miR-4676-3p	DYRK1A		hsa-miR-589	ITPR1
												hsa-miR-153-5p	DYRK1A		hsa-miR-593	ITPR1
												hsa-miR-4775	DYRK1A		hsa-miR-593	ITPR1
												hsa-miR-452-5p	DYRK1A		hsa-miR-598	ITPR1
												hsa-miR-4757-5p	DYRK1A		hsa-miR-598	ITPR1
												hsa-miR-6744-3p	DYRK1A		hsa-miR-608	ITPR1
												hsa-miR-892a	DYRK1A		hsa-miR-608	ITPR1
												hsa-miR-4274	DYRK1A		hsa-miR-611	ITPR1
												hsa-miR-485-3p	DYRK1A		hsa-miR-615	ITPR1
												hsa-miR-539-3p	DYRK1A		hsa-miR-615	ITPR1
												hsa-miR-5581-3p	DYRK1A		hsa-miR-623	ITPR1
												hsa-miR-1305	DYRK1A		hsa-miR-635	ITPR1
												hsa-miR-4704-3p	DYRK1A		hsa-miR-635	ITPR1
												hsa-miR-495-3p	DYRK1A		hsa-miR-648	ITPR1
												hsa-miR-5688	DYRK1A		hsa-miR-650	ITPR1
												hsa-miR-584-3p	DYRK1A		hsa-miR-650	ITPR1
												hsa-miR-6772-3p	DYRK1A		hsa-miR-654	ITPR1
												hsa-miR-6880-5p	DYRK1A		hsa-miR-654	ITPR1
												hsa-miR-548av-3p	DYRK1A		hsa-miR-659	ITPR1
												hsa-miR-4672	DYRK1A		hsa-miR-659	ITPR1
												hsa-miR-8057	DYRK1A		hsa-miR-661	ITPR1
												hsa-miR-145-5p	DYRK1A		hsa-miR-661	ITPR1
												hsa-miR-5195-3p	DYRK1A		hsa-miR-769-5p	ITPR1
												hsa-miR-211-5p	DYRK1A		hsa-miR-769-5p	ITPR1
												hsa-miR-204-5p	DYRK1A		hsa-miR-96	ITPR1
												hsa-miR-4293	DYRK1A		hsa-miR-96	ITPR1
												hsa-miR-4302	DYRK1A
												hsa-miR-9-5p	DYRK1A		hsa-miR-101	MAP3K7
												hsa-miR-224-3p	DYRK1A		hsa-miR-101	MAP3K7
												hsa-miR-5696	DYRK1A		hsa-miR-106a	MAP3K7
												hsa-miR-522-3p	DYRK1A		hsa-miR-106a	MAP3K7
												hsa-miR-369-3p	DYRK1A		hsa-miR-106b	MAP3K7
												hsa-miR-4665-5p	DYRK1A		hsa-miR-106b	MAP3K7
												hsa-miR-592	DYRK1A		hsa-miR-10a	MAP3K7
												hsa-miR-425-5p	DYRK1A		hsa-miR-10a	MAP3K7
												hsa-miR-6851-3p	DYRK1A		hsa-miR-10b	MAP3K7
												hsa-miR-3529-3p	DYRK1A		hsa-miR-10b	MAP3K7
												hsa-miR-4713-5p	DYRK1A		hsa-miR-1275	MAP3K7
												hsa-miR-338-5p	DYRK1A		hsa-miR-1275	MAP3K7
												hsa-miR-4709-5p	DYRK1A		hsa-miR-129	MAP3K7
												hsa-miR-6835-3p	DYRK1A		hsa-miR-129	MAP3K7
												hsa-miR-4535	DYRK1A		hsa-miR-137	MAP3K7
												hsa-miR-1255b-2-3p	DYRK1A		hsa-miR-137	MAP3K7
												hsa-miR-1246	DYRK1A		hsa-miR-139	MAP3K7
												hsa-miR-520g-3p	DYRK1A		hsa-miR-139	MAP3K7
												hsa-miR-302f	DYRK1A		hsa-miR-17-5p	MAP3K7
												hsa-miR-548x-3p	DYRK1A		hsa-miR-17-5p	MAP3K7
												hsa-miR-3157-5p	DYRK1A		hsa-miR-20a	MAP3K7
												hsa-miR-548j-3p	DYRK1A		hsa-miR-20a	MAP3K7
												hsa-miR-548am-3p	DYRK1A		hsa-miR-20b	MAP3K7
												hsa-miR-548ae-3p	DYRK1A		hsa-miR-20b	MAP3K7
												hsa-miR-548aj-3p	DYRK1A		hsa-miR-216	MAP3K7
												hsa-miR-520h	DYRK1A		hsa-miR-216	MAP3K7
												hsa-miR-548ah-3p	DYRK1A		hsa-miR-217	MAP3K7
												hsa-miR-548aq-3p	DYRK1A		hsa-miR-217	MAP3K7
												hsa-miR-21-3p	DYRK1A		hsa-miR-22	MAP3K7
												hsa-miR-6794-5p	DYRK1A		hsa-miR-22	MAP3K7
												hsa-miR-646	DYRK1A		hsa-miR-224	MAP3K7
												hsa-miR-1224-5p	DYRK1A		hsa-miR-224	MAP3K7
												hsa-miR-3591-3p	DYRK1A		hsa-miR-302b*	MAP3K7
												hsa-miR-8075	DYRK1A		hsa-miR-302b*	MAP3K7
												hsa-miR-942-3p	DYRK1A		hsa-miR-302c	MAP3K7
												hsa-miR-6813-5p	DYRK1A		hsa-miR-302c	MAP3K7
												hsa-miR-6085	DYRK1A		hsa-miR-30a-3p	MAP3K7
												hsa-miR-4486	DYRK1A		hsa-miR-30a-3p	MAP3K7
												hsa-miR-6833-5p	DYRK1A		hsa-miR-30a-5p	MAP3K7
												hsa-miR-3120-5p	DYRK1A		hsa-miR-30a-5p	MAP3K7
												hsa-miR-544a	DYRK1A		hsa-miR-30d	MAP3K7
												hsa-miR-23c	DYRK1A		hsa-miR-30d	MAP3K7
												hsa-miR-634	DYRK1A		hsa-miR-30e-3p	MAP3K7
												hsa-miR-130a-5p	DYRK1A		hsa-miR-30e-3p	MAP3K7
												hsa-miR-23b-3p	DYRK1A		hsa-miR-339	MAP3K7
												hsa-miR-23a-3p	DYRK1A		hsa-miR-339	MAP3K7
												hsa-miR-7159-5p	DYRK1A		hsa-miR-33b	MAP3K7
												hsa-miR-497-3p	DYRK1A		hsa-miR-33b	MAP3K7
												hsa-miR-519e-3p	DYRK1A		hsa-miR-345	MAP3K7
												hsa-miR-660-5p	DYRK1A		hsa-miR-345	MAP3K7
												hsa-miR-6071	DYRK1A		hsa-miR-34b	MAP3K7
												hsa-miR-515-3p	DYRK1A		hsa-miR-34b	MAP3K7
												hsa-miR-33b-3p	DYRK1A		hsa-miR-372	MAP3K7
												hsa-miR-6804-3p	DYRK1A		hsa-miR-372	MAP3K7
												hsa-miR-4328	DYRK1A		hsa-miR-381	MAP3K7
												hsa-miR-3202	DYRK1A		hsa-miR-381	MAP3K7
												hsa-miR-4639-5p	DYRK1A		hsa-miR-448	MAP3K7
												hsa-miR-557	DYRK1A		hsa-miR-448	MAP3K7
												hsa-miR-103a-2-5p	DYRK1A		hsa-miR-452	MAP3K7
												hsa-miR-548f-5p	DYRK1A		hsa-miR-452	MAP3K7
												hsa-miR-548g-5p	DYRK1A		hsa-miR-494	MAP3K7
												hsa-miR-192-5p	DYRK1A		hsa-miR-494	MAP3K7
												hsa-miR-4258	DYRK1A		hsa-miR-495	MAP3K7
												hsa-miR-4662b	DYRK1A		hsa-miR-495	MAP3K7
												hsa-miR-548x-5p	DYRK1A		hsa-miR-512-3p	MAP3K7
												hsa-miR-215-5p	DYRK1A		hsa-miR-512-3p	MAP3K7
												hsa-miR-548aj-5p	DYRK1A		hsa-miR-513	MAP3K7
												hsa-miR-4727-3p	DYRK1A		hsa-miR-513	MAP3K7
												hsa-miR-4647	DYRK1A		hsa-miR-515-3p	MAP3K7
												hsa-miR-374b-3p	DYRK1A		hsa-miR-515-3p	MAP3K7
												hsa-miR-4731-3p	DYRK1A		hsa-miR-516-3p	MAP3K7
												hsa-miR-3121-5p	DYRK1A		hsa-miR-516-3p	MAP3K7
												hsa-miR-194-5p	DYRK1A		hsa-miR-517*	MAP3K7
												hsa-miR-636	DYRK1A		hsa-miR-517*	MAP3K7
												hsa-miR-548f-3p	DYRK1A		hsa-miR-519d	MAP3K7
												hsa-miR-1537-5p	DYRK1A		hsa-miR-519d	MAP3K7
												hsa-miR-7845-5p	DYRK1A		hsa-miR-519e*	MAP3K7
												hsa-miR-548e-3p	DYRK1A		hsa-miR-519e*	MAP3K7
												hsa-miR-182-5p	DYRK1A		hsa-miR-520d	MAP3K7
												hsa-miR-548az-3p	DYRK1A		hsa-miR-520d	MAP3K7
												hsa-miR-4801	DYRK1A		hsa-miR-520g	MAP3K7
												hsa-miR-632	DYRK1A		hsa-miR-520g	MAP3K7
												hsa-miR-548a-3p	DYRK1A		hsa-miR-520h	MAP3K7
												hsa-miR-548ar-3p	DYRK1A		hsa-miR-520h	MAP3K7
												hsa-miR-409-5p	DYRK1A		hsa-miR-526b	MAP3K7
												hsa-miR-939-5p	DYRK1A		hsa-miR-526b	MAP3K7
												hsa-miR-3139	DYRK1A		hsa-miR-542-3p	MAP3K7
												hsa-miR-28-5p	DYRK1A		hsa-miR-542-3p	MAP3K7
												hsa-miR-143-5p	DYRK1A		hsa-miR-553	MAP3K7
												hsa-miR-708-5p	DYRK1A		hsa-miR-553	MAP3K7
												hsa-miR-1343-5p	DYRK1A		hsa-miR-557	MAP3K7
												hsa-miR-3714	DYRK1A		hsa-miR-557	MAP3K7
												hsa-miR-335-3p	DYRK1A		hsa-miR-561	MAP3K7
												hsa-miR-6815-3p	DYRK1A		hsa-miR-561	MAP3K7
												hsa-miR-4531	DYRK1A		hsa-miR-573	MAP3K7
												hsa-miR-6808-3p	DYRK1A		hsa-miR-573	MAP3K7
												hsa-miR-3607-3p	DYRK1A		hsa-miR-582	MAP3K7
												hsa-miR-2467-3p	DYRK1A		hsa-miR-582	MAP3K7
												hsa-miR-154-5p	DYRK1A		hsa-miR-582	MAP3K7
												hsa-miR-4782-5p	DYRK1A		hsa-miR-582	MAP3K7
												hsa-miR-449b-3p	DYRK1A		hsa-miR-589	MAP3K7
												hsa-miR-583	DYRK1A		hsa-miR-589	MAP3K7
												hsa-miR-6768-5p	DYRK1A		hsa-miR-629	MAP3K7
												hsa-miR-6841-3p	DYRK1A		hsa-miR-629	MAP3K7
												hsa-miR-183-3p	DYRK1A		hsa-miR-640	MAP3K7
												hsa-miR-5706	DYRK1A		hsa-miR-640	MAP3K7
												hsa-miR-645	DYRK1A		hsa-miR-646	MAP3K7
												hsa-miR-6768-3p	DYRK1A		hsa-miR-646	MAP3K7
															hsa-miR-7	MAP3K7
												hsa-miR-6856-3p	HOMER2		hsa-miR-7	MAP3K7
												hsa-miR-5004-3p	HOMER2		hsa-miR-765	MAP3K7
												hsa-miR-4684-3p	HOMER2		hsa-miR-765	MAP3K7
												hsa-miR-129-2-3p	HOMER2		hsa-miR-801	MAP3K7
												hsa-miR-1200	HOMER2		hsa-miR-801	MAP3K7
												hsa-miR-129-1-3p	HOMER2		hsa-miR-923	MAP3K7
												hsa-miR-938	HOMER2		hsa-miR-923	MAP3K7
												hsa-miR-4293	HOMER2		hsa-miR-93	MAP3K7
												hsa-miR-7976	HOMER2		hsa-miR-93	MAP3K7
												hsa-miR-4433b-3p	HOMER2
												hsa-miR-6865-3p	HOMER2		hsa-let-7b	CSNK1A1
												hsa-miR-486-3p	HOMER2		hsa-let-7b	CSNK1A1
												hsa-miR-4492	HOMER2		hsa-let-7c	CSNK1A1
												hsa-miR-217	HOMER2		hsa-let-7c	CSNK1A1
												hsa-miR-6807-3p	HOMER2		hsa-let-7d	CSNK1A1
												hsa-miR-7156-5p	HOMER2		hsa-let-7d	CSNK1A1
												hsa-miR-4273	HOMER2		hsa-let-7e	CSNK1A1
												hsa-miR-4753-5p	HOMER2		hsa-let-7e	CSNK1A1
												hsa-miR-5702	HOMER2		hsa-let-7g	CSNK1A1
												hsa-miR-4456	HOMER2		hsa-let-7g	CSNK1A1
												hsa-miR-6828-3p	HOMER2		hsa-miR-103	CSNK1A1
												hsa-miR-548aa	HOMER2		hsa-miR-103	CSNK1A1
												hsa-miR-548t-3p	HOMER2		hsa-miR-103	CSNK1A1
												hsa-miR-548ap-3p	HOMER2		hsa-miR-107	CSNK1A1
												hsa-miR-26a-2-3p	HOMER2		hsa-miR-107	CSNK1A1
												hsa-miR-4732-3p	HOMER2		hsa-miR-107	CSNK1A1
												hsa-miR-26a-1-3p	HOMER2		hsa-miR-122a	CSNK1A1
												hsa-miR-6752-3p	HOMER2		hsa-miR-122a	CSNK1A1
												hsa-miR-6885-5p	HOMER2		hsa-miR-128a	CSNK1A1
												hsa-miR-3927-3p	HOMER2		hsa-miR-128a	CSNK1A1
												hsa-miR-328-5p	HOMER2		hsa-miR-128a	CSNK1A1
												hsa-miR-6831-5p	HOMER2		hsa-miR-128b	CSNK1A1
												hsa-miR-6839-5p	HOMER2		hsa-miR-128b	CSNK1A1
												hsa-miR-378j	HOMER2		hsa-miR-128b	CSNK1A1
												hsa-miR-4532	HOMER2		hsa-miR-130b	CSNK1A1
												hsa-miR-3922-5p	HOMER2		hsa-miR-130b	CSNK1A1
												hsa-miR-758-5p	HOMER2		hsa-miR-143	CSNK1A1
												hsa-miR-6816-5p	HOMER2		hsa-miR-143	CSNK1A1
												hsa-miR-466	HOMER2		hsa-miR-148a	CSNK1A1
												hsa-miR-3196	HOMER2		hsa-miR-148a	CSNK1A1
												hsa-miR-874-3p	HOMER2		hsa-miR-148b	CSNK1A1
												hsa-miR-2117	HOMER2		hsa-miR-148b	CSNK1A1
												hsa-miR-4261	HOMER2		hsa-miR-149*	CSNK1A1
												hsa-miR-4508	HOMER2		hsa-miR-149*	CSNK1A1
												hsa-miR-409-3p	HOMER2		hsa-miR-149*	CSNK1A1
												hsa-miR-4498	HOMER2		hsa-miR-152	CSNK1A1
												hsa-miR-762	HOMER2		hsa-miR-152	CSNK1A1
												hsa-miR-5001-5p	HOMER2		hsa-miR-153	CSNK1A1
												hsa-miR-4698	HOMER2		hsa-miR-17-5p	CSNK1A1
												hsa-miR-145-3p	HOMER2		hsa-miR-17-5p	CSNK1A1
															hsa-miR-199a*	CSNK1A1
												hsa-miR-4729	ITPR1		hsa-miR-199a*	CSNK1A1
												hsa-miR-8057	ITPR1		hsa-miR-20b	CSNK1A1
												hsa-miR-204-5p	ITPR1		hsa-miR-20b	CSNK1A1
												hsa-miR-211-5p	ITPR1		hsa-miR-221	CSNK1A1
												hsa-miR-92b-3p	ITPR1		hsa-miR-221	CSNK1A1
												hsa-miR-4328	ITPR1		hsa-miR-27b	CSNK1A1
												hsa-miR-367-3p	ITPR1		hsa-miR-27b	CSNK1A1
												hsa-miR-25-3p	ITPR1		hsa-miR-28	CSNK1A1
												hsa-miR-363-3p	ITPR1		hsa-miR-324-3p	CSNK1A1
												hsa-miR-92a-3p	ITPR1		hsa-miR-324-3p	CSNK1A1
												hsa-miR-96-5p	ITPR1		hsa-miR-326	CSNK1A1
												hsa-miR-1271-5p	ITPR1		hsa-miR-326	CSNK1A1
												hsa-miR-32-5p	ITPR1		hsa-miR-331	CSNK1A1
												hsa-miR-586	ITPR1		hsa-miR-335	CSNK1A1
												hsa-miR-892b	ITPR1		hsa-miR-335	CSNK1A1
												hsa-miR-579-3p	ITPR1		hsa-miR-342	CSNK1A1
												hsa-miR-664b-3p	ITPR1		hsa-miR-342	CSNK1A1
												hsa-miR-26a-2-3p	ITPR1		hsa-miR-342	CSNK1A1
												hsa-miR-26a-1-3p	ITPR1		hsa-miR-34a	CSNK1A1
												hsa-miR-642b-5p	ITPR1		hsa-miR-34a	CSNK1A1
												hsa-miR-548f-3p	ITPR1		hsa-miR-363*	CSNK1A1
												hsa-miR-548az-3p	ITPR1		hsa-miR-363*	CSNK1A1
												hsa-miR-548e-3p	ITPR1		hsa-miR-377	CSNK1A1
												hsa-miR-548ar-3p	ITPR1		hsa-miR-377	CSNK1A1
												hsa-miR-548a-3p	ITPR1		hsa-miR-378	CSNK1A1
												hsa-miR-519a-3p	ITPR1		hsa-miR-378	CSNK1A1
												hsa-miR-519b-3p	ITPR1		hsa-miR-409-3p	CSNK1A1
												hsa-miR-3607-5p	ITPR1		hsa-miR-409-5p	CSNK1A1
												hsa-miR-224-5p	ITPR1		hsa-miR-409-5p	CSNK1A1
												hsa-miR-519c-3p	ITPR1		hsa-miR-424	CSNK1A1
												hsa-miR-153-5p	ITPR1		hsa-miR-424	CSNK1A1
												hsa-miR-3678-3p	ITPR1		hsa-miR-452	CSNK1A1
												hsa-miR-144-3p	ITPR1		hsa-miR-452*	CSNK1A1
												hsa-miR-3171	ITPR1		hsa-miR-452*	CSNK1A1
												hsa-miR-3662	ITPR1		hsa-miR-485-3p	CSNK1A1
												hsa-miR-548an	ITPR1		hsa-miR-485-3p	CSNK1A1
												hsa-miR-4803	ITPR1		hsa-miR-491	CSNK1A1
												hsa-miR-454-3p	ITPR1		hsa-miR-491	CSNK1A1
												hsa-miR-130a-3p	ITPR1		hsa-miR-493-3p	CSNK1A1
												hsa-miR-4295	ITPR1		hsa-miR-501	CSNK1A1
												hsa-miR-129-5p	ITPR1		hsa-miR-501	CSNK1A1
												hsa-miR-510-3p	ITPR1		hsa-miR-505	CSNK1A1
												hsa-miR-3666	ITPR1		hsa-miR-505	CSNK1A1
												hsa-miR-301a-3p	ITPR1		hsa-miR-515-5p	CSNK1A1
												hsa-miR-130b-3p	ITPR1		hsa-miR-515-5p	CSNK1A1
												hsa-miR-5006-3p	ITPR1		hsa-miR-515-5p	CSNK1A1
												hsa-miR-4504	ITPR1		hsa-miR-519d	CSNK1A1
												hsa-miR-8076	ITPR1		hsa-miR-519d	CSNK1A1
												hsa-miR-4755-5p	ITPR1		hsa-miR-519e*	CSNK1A1
												hsa-miR-301b-3p	ITPR1		hsa-miR-519e*	CSNK1A1
												hsa-miR-103a-3p	ITPR1		hsa-miR-548b	CSNK1A1
												hsa-miR-6877-3p	ITPR1		hsa-miR-548b	CSNK1A1
												hsa-miR-107	ITPR1		hsa-miR-555	CSNK1A1
												hsa-miR-4279	ITPR1		hsa-miR-555	CSNK1A1
												hsa-miR-4540	ITPR1		hsa-miR-557	CSNK1A1
												hsa-miR-4666a-5p	ITPR1		hsa-miR-574	CSNK1A1
												hsa-miR-3910	ITPR1		hsa-miR-574	CSNK1A1
												hsa-miR-362-3p	ITPR1		hsa-miR-574-5p	CSNK1A1
												hsa-miR-6505-3p	ITPR1		hsa-miR-574-5p	CSNK1A1
												hsa-miR-764	ITPR1		hsa-miR-593	CSNK1A1
												hsa-miR-2114-3p	ITPR1		hsa-miR-593	CSNK1A1
												hsa-miR-6823-3p	ITPR1		hsa-miR-595	CSNK1A1
												hsa-miR-6739-3p	ITPR1		hsa-miR-595	CSNK1A1
												hsa-miR-4501	ITPR1		hsa-miR-602	CSNK1A1
												hsa-miR-196a-3p	ITPR1		hsa-miR-602	CSNK1A1
												hsa-miR-576-5p	ITPR1		hsa-miR-604	CSNK1A1
												hsa-miR-6838-5p	ITPR1		hsa-miR-608	CSNK1A1
												hsa-miR-19b-3p	ITPR1		hsa-miR-608	CSNK1A1
												hsa-miR-424-5p	ITPR1		hsa-miR-612	CSNK1A1
												hsa-miR-195-5p	ITPR1		hsa-miR-612	CSNK1A1
												hsa-miR-15a-5p	ITPR1		hsa-miR-625	CSNK1A1
												hsa-miR-16-5p	ITPR1		hsa-miR-625	CSNK1A1
												hsa-miR-497-5p	ITPR1		hsa-miR-638	CSNK1A1
												hsa-miR-19a-3p	ITPR1		hsa-miR-644	CSNK1A1
												hsa-miR-15b-5p	ITPR1		hsa-miR-644	CSNK1A1
												hsa-miR-190a-3p	ITPR1		hsa-miR-648	CSNK1A1
												hsa-miR-4794	ITPR1		hsa-miR-648	CSNK1A1
												hsa-miR-664a-5p	ITPR1		hsa-miR-650	CSNK1A1
												hsa-miR-6503-3p	ITPR1		hsa-miR-650	CSNK1A1
												hsa-miR-4685-3p	ITPR1		hsa-miR-658	CSNK1A1
												hsa-miR-548ap-3p	ITPR1		hsa-miR-658	CSNK1A1
												hsa-miR-1245b-3p	ITPR1		hsa-miR-663	CSNK1A1
												hsa-miR-4287	ITPR1		hsa-miR-663	CSNK1A1
												hsa-miR-548aa	ITPR1		hsa-miR-671	CSNK1A1
												hsa-miR-548t-3p	ITPR1		hsa-miR-675	CSNK1A1
												hsa-miR-627-3p	ITPR1		hsa-miR-675	CSNK1A1
												hsa-miR-3646	ITPR1		hsa-miR-801	CSNK1A1
												hsa-miR-8070	ITPR1		hsa-miR-801	CSNK1A1
												hsa-miR-659-3p	ITPR1		hsa-miR-92	CSNK1A1
												hsa-miR-130b-5p	ITPR1		hsa-miR-92	CSNK1A1
												hsa-miR-425-5p	ITPR1		hsa-miR-923	CSNK1A1
												hsa-miR-4529-3p	ITPR1		hsa-miR-923	CSNK1A1
												hsa-miR-361-3p	ITPR1		hsa-miR-92b	CSNK1A1
												hsa-miR-1197	ITPR1		hsa-miR-92b	CSNK1A1
												hsa-miR-2115-3p	ITPR1
												hsa-miR-4524b-3p	ITPR1		hsa-let-7b	LRRK2
												hsa-miR-96-3p	ITPR1		hsa-let-7b	LRRK2
												hsa-miR-153-3p	ITPR1		hsa-miR-103	LRRK2
												hsa-miR-4694-3p	ITPR1		hsa-miR-103	LRRK2
												hsa-miR-6819-3p	ITPR1		hsa-miR-138	LRRK2
												hsa-miR-4778-3p	ITPR1		hsa-miR-138	LRRK2
												hsa-miR-150-3p	ITPR1		hsa-miR-15a	LRRK2
												hsa-miR-4766-3p	ITPR1		hsa-miR-15a	LRRK2
												hsa-miR-7112-3p	ITPR1		hsa-miR-181b	LRRK2
												hsa-miR-544a	ITPR1		hsa-miR-181b	LRRK2
												hsa-miR-495-5p	ITPR1		hsa-miR-181d	LRRK2
												hsa-miR-3151-3p	ITPR1		hsa-miR-181d	LRRK2
												hsa-miR-942-3p	ITPR1		hsa-miR-183	LRRK2
												hsa-miR-3913-3p	ITPR1		hsa-miR-183	LRRK2
												hsa-miR-496	ITPR1		hsa-miR-184	LRRK2
												hsa-miR-1915-3p	ITPR1		hsa-miR-184	LRRK2
												hsa-miR-6764-5p	ITPR1		hsa-miR-186	LRRK2
												hsa-miR-329-3p	ITPR1		hsa-miR-188	LRRK2
												hsa-miR-5696	ITPR1		hsa-miR-338	LRRK2
												hsa-miR-298	ITPR1		hsa-miR-338	LRRK2
												hsa-miR-3137	ITPR1		hsa-miR-342	LRRK2
															hsa-miR-342	LRRK2
												hsa-miR-545-3p	MAP3K7		hsa-miR-377	LRRK2
												hsa-miR-450a-1-3p	MAP3K7		hsa-miR-377	LRRK2
												hsa-miR-3148	MAP3K7		hsa-miR-380-3p	LRRK2
												hsa-miR-548ap-3p	MAP3K7		hsa-miR-380-3p	LRRK2
												hsa-miR-548aa	MAP3K7		hsa-miR-409-3p	LRRK2
												hsa-miR-126-5p	MAP3K7		hsa-miR-409-3p	LRRK2
												hsa-miR-651-3p	MAP3K7		hsa-miR-425-5p	LRRK2
												hsa-miR-4668-5p	MAP3K7		hsa-miR-425-5p	LRRK2
												hsa-miR-548t-3p	MAP3K7		hsa-miR-425-5p	LRRK2
												hsa-miR-935	MAP3K7		hsa-miR-497	LRRK2
												hsa-miR-4795-3p	MAP3K7		hsa-miR-497	LRRK2
												hsa-miR-4698	MAP3K7		hsa-miR-501	LRRK2
												hsa-miR-139-5p	MAP3K7		hsa-miR-501	LRRK2
												hsa-miR-545-5p	MAP3K7		hsa-miR-506	LRRK2
												hsa-miR-106a-3p	MAP3K7		hsa-miR-506	LRRK2
												hsa-miR-607	MAP3K7		hsa-miR-522	LRRK2
												hsa-miR-3671	MAP3K7		hsa-miR-522	LRRK2
												hsa-miR-21-3p	MAP3K7		hsa-miR-522	LRRK2
												hsa-miR-3591-3p	MAP3K7		hsa-miR-552	LRRK2
												hsa-miR-8485	MAP3K7		hsa-miR-552	LRRK2
												hsa-miR-380-3p	MAP3K7		hsa-miR-556	LRRK2
												hsa-miR-5006-3p	MAP3K7		hsa-miR-556	LRRK2
												hsa-miR-4755-5p	MAP3K7		hsa-miR-567	LRRK2
												hsa-miR-4746-5p	MAP3K7		hsa-miR-567	LRRK2
												hsa-miR-4680-3p	MAP3K7		hsa-miR-580	LRRK2
												hsa-miR-2052	MAP3K7		hsa-miR-580	LRRK2
												hsa-miR-1237-3p	MAP3K7		hsa-miR-581	LRRK2
												hsa-miR-1178-3p	MAP3K7		hsa-miR-581	LRRK2
												hsa-miR-377-3p	MAP3K7		hsa-miR-587	LRRK2
												hsa-miR-544a	MAP3K7		hsa-miR-587	LRRK2
												hsa-miR-590-3p	MAP3K7		hsa-miR-587	LRRK2
												hsa-miR-329-5p	MAP3K7		hsa-miR-593	LRRK2
												hsa-miR-550b-3p	MAP3K7		hsa-miR-593	LRRK2
												hsa-miR-1205	MAP3K7		hsa-miR-603	LRRK2
												hsa-miR-3680-3p	MAP3K7		hsa-miR-603	LRRK2
												hsa-miR-143-3p	MAP3K7		hsa-miR-608	LRRK2
												hsa-miR-6821-3p	MAP3K7		hsa-miR-608	LRRK2
												hsa-miR-4729	MAP3K7		hsa-miR-610	LRRK2
												hsa-miR-20a-3p	MAP3K7		hsa-miR-610	LRRK2
												hsa-miR-6088	MAP3K7		hsa-miR-622	LRRK2
												hsa-miR-4770	MAP3K7		hsa-miR-622	LRRK2
												hsa-miR-497-3p	MAP3K7		hsa-miR-671	LRRK2
												hsa-miR-548d-3p	MAP3K7		hsa-miR-671	LRRK2
												hsa-miR-548h-3p	MAP3K7		hsa-miR-96	LRRK2
												hsa-miR-548z	MAP3K7		hsa-miR-96	LRRK2
												hsa-miR-548bb-3p	MAP3K7
												hsa-miR-548ac	MAP3K7		hsa-let-7a	STIM1
												hsa-miR-6733-3p	MAP3K7		hsa-let-7b	STIM1
												hsa-miR-642a-5p	MAP3K7		hsa-let-7b	STIM1
												hsa-miR-5696	MAP3K7		hsa-let-7c	STIM1
												hsa-miR-10b-5p	MAP3K7		hsa-let-7d	STIM1
												hsa-miR-10a-5p	MAP3K7		hsa-let-7d	STIM1
												hsa-miR-516a-3p	MAP3K7		hsa-let-7e	STIM1
												hsa-miR-7162-5p	MAP3K7		hsa-let-7e	STIM1
												hsa-miR-516b-3p	MAP3K7		hsa-let-7f	STIM1
												hsa-miR-3915	MAP3K7		hsa-let-7g	STIM1
												hsa-miR-3664-5p	MAP3K7		hsa-let-7g	STIM1
												hsa-miR-6875-3p	MAP3K7		hsa-miR-101	STIM1
												hsa-miR-7-1-3p	MAP3K7		hsa-miR-101	STIM1
												hsa-miR-7-2-3p	MAP3K7		hsa-miR-103	STIM1
												hsa-miR-4738-3p	MAP3K7		hsa-miR-103	STIM1
												hsa-miR-155-5p	MAP3K7		hsa-miR-106a	STIM1
												hsa-miR-3185	MAP3K7		hsa-miR-106a	STIM1
												hsa-miR-548c-3p	MAP3K7		hsa-miR-107	STIM1
												hsa-miR-137	MAP3K7		hsa-miR-107	STIM1
												hsa-miR-31-3p	MAP3K7		hsa-miR-122a	STIM1
												hsa-miR-548t-5p	MAP3K7		hsa-miR-122a	STIM1
												hsa-miR-548az-5p	MAP3K7		hsa-miR-125a	STIM1
												hsa-miR-448	MAP3K7		hsa-miR-125a	STIM1
												hsa-miR-4731-3p	MAP3K7		hsa-miR-1275	STIM1
												hsa-miR-579-3p	MAP3K7		hsa-miR-1275	STIM1
												hsa-miR-4801	MAP3K7		hsa-miR-1275	STIM1
												hsa-miR-133a-5p	MAP3K7		hsa-miR-1275	STIM1
												hsa-miR-5680	MAP3K7		hsa-miR-1275	STIM1
												hsa-miR-30e-3p	MAP3K7		hsa-miR-132	STIM1
												hsa-miR-339-5p	MAP3K7		hsa-miR-132	STIM1
												hsa-miR-30d-3p	MAP3K7		hsa-miR-134	STIM1
												hsa-miR-548o-3p	MAP3K7		hsa-miR-134	STIM1
												hsa-miR-6794-3p	MAP3K7		hsa-miR-134	STIM1
												hsa-miR-30a-3p	MAP3K7		hsa-miR-136	STIM1
												hsa-miR-8056	MAP3K7		hsa-miR-140	STIM1
												hsa-miR-1323	MAP3K7		hsa-miR-140	STIM1
												hsa-miR-888-5p	MAP3K7		hsa-miR-143	STIM1
												hsa-miR-646	MAP3K7		hsa-miR-143	STIM1
												hsa-miR-4528	MAP3K7		hsa-miR-145	STIM1
												hsa-miR-551b-5p	MAP3K7		hsa-miR-145	STIM1
												hsa-miR-664b-3p	MAP3K7		hsa-miR-146a	STIM1
												hsa-miR-4774-5p	MAP3K7		hsa-miR-146a	STIM1
												hsa-miR-6500-3p	MAP3K7		hsa-miR-146b	STIM1
												hsa-miR-548p	MAP3K7		hsa-miR-146b	STIM1
												hsa-miR-338-5p	MAP3K7		hsa-miR-148a	STIM1
												hsa-miR-589-3p	MAP3K7		hsa-miR-148b	STIM1
												hsa-miR-582-5p	MAP3K7		hsa-miR-149	STIM1
												hsa-miR-892c-5p	MAP3K7		hsa-miR-149*	STIM1
												hsa-miR-765	MAP3K7		hsa-miR-149*	STIM1
												hsa-miR-2682-5p	MAP3K7		hsa-miR-149*	STIM1
												hsa-miR-181d-5p	MAP3K7		hsa-miR-149*	STIM1
												hsa-miR-181c-5p	MAP3K7		hsa-miR-149*	STIM1
												hsa-miR-4262	MAP3K7		hsa-miR-149*	STIM1
												hsa-miR-181a-5p	MAP3K7		hsa-miR-150	STIM1
												hsa-miR-181b-5p	MAP3K7		hsa-miR-150	STIM1
												hsa-miR-33a-5p	MAP3K7		hsa-miR-150	STIM1
												hsa-miR-3124-3p	MAP3K7		hsa-miR-152	STIM1
												hsa-miR-7152-5p	MAP3K7		hsa-miR-152	STIM1
												hsa-miR-4254	MAP3K7		hsa-miR-154*	STIM1
												hsa-miR-33b-5p	MAP3K7		hsa-miR-154*	STIM1
												hsa-miR-4709-3p	MAP3K7		hsa-miR-15a	STIM1
												hsa-miR-7161-3p	MAP3K7		hsa-miR-15a	STIM1
												hsa-miR-4524b-3p	MAP3K7		hsa-miR-15a	STIM1
												hsa-miR-766-5p	MAP3K7		hsa-miR-15b	STIM1
												hsa-miR-4478	MAP3K7		hsa-miR-15b	STIM1
												hsa-miR-4797-5p	MAP3K7		hsa-miR-15b	STIM1
												hsa-miR-4266	MAP3K7		hsa-miR-16	STIM1
												hsa-miR-186-5p	MAP3K7		hsa-miR-16	STIM1
												hsa-miR-3164	MAP3K7		hsa-miR-16	STIM1
												hsa-miR-129-5p	MAP3K7		hsa-miR-17-3p	STIM1
												hsa-miR-4517	MAP3K7		hsa-miR-17-3p	STIM1
												hsa-miR-3613-3p	MAP3K7		hsa-miR-17-3p	STIM1
												hsa-miR-6820-3p	MAP3K7		hsa-miR-17-3p	STIM1
												hsa-miR-660-3p	MAP3K7		hsa-miR-184	STIM1
												hsa-miR-4496	MAP3K7		hsa-miR-184	STIM1
												hsa-miR-664a-3p	MAP3K7		hsa-miR-184	STIM1
															hsa-miR-185	STIM1
												hsa-miR-6127	TAB1		hsa-miR-185	STIM1
												hsa-miR-4419a	TAB1		hsa-miR-188	STIM1
												hsa-miR-4510	TAB1		hsa-miR-188	STIM1
												hsa-miR-6130	TAB1		hsa-miR-18a*	STIM1
												hsa-miR-3065-3p	TAB1		hsa-miR-18a*	STIM1
												hsa-miR-6133	TAB1		hsa-miR-193b	STIM1
												hsa-miR-6129	TAB1		hsa-miR-193b	STIM1
												hsa-miR-6825-5p	TAB1		hsa-miR-195	STIM1
												hsa-miR-660-3p	TAB1		hsa-miR-195	STIM1
												hsa-miR-6849-3p	TAB1		hsa-miR-197	STIM1
												hsa-miR-3192-5p	TAB1		hsa-miR-197	STIM1
												hsa-miR-1296-3p	TAB1		hsa-miR-197	STIM1
												hsa-miR-1915-3p	TAB1		hsa-miR-198	STIM1
												hsa-miR-6764-5p	TAB1		hsa-miR-198	STIM1
												hsa-miR-4308	TAB1		hsa-miR-199a	STIM1
												hsa-miR-519c-5p	TAB1		hsa-miR-199a	STIM1
												hsa-miR-526a	TAB1		hsa-miR-199b	STIM1
												hsa-miR-519a-5p	TAB1		hsa-miR-199b	STIM1
												hsa-miR-519b-5p	TAB1		hsa-miR-202	STIM1
												hsa-miR-518e-5p	TAB1		hsa-miR-202	STIM1
												hsa-miR-518d-5p	TAB1		hsa-miR-202*	STIM1
												hsa-miR-520c-5p	TAB1		hsa-miR-204	STIM1
												hsa-miR-523-5p	TAB1		hsa-miR-204	STIM1
												hsa-miR-518f-5p	TAB1		hsa-miR-205	STIM1
												hsa-miR-522-5p	TAB1		hsa-miR-205	STIM1
												hsa-miR-6775-3p	TAB1		hsa-miR-206	STIM1
												hsa-miR-1291	TAB1		hsa-miR-206	STIM1
												hsa-miR-889-3p	TAB1		hsa-miR-211	STIM1
												hsa-miR-4532	TAB1		hsa-miR-211	STIM1
												hsa-miR-6780a-3p	TAB1		hsa-miR-214	STIM1
												hsa-miR-888-3p	TAB1		hsa-miR-214	STIM1
												hsa-miR-6763-5p	TAB1		hsa-miR-214	STIM1
												hsa-miR-3150a-3p	TAB1		hsa-miR-220	STIM1
												hsa-miR-4456	TAB1		hsa-miR-28	STIM1
												hsa-miR-129-5p	TAB1		hsa-miR-28	STIM1
												hsa-miR-608	TAB1		hsa-miR-299-3p	STIM1
												hsa-miR-4514	TAB1		hsa-miR-299-3p	STIM1
												hsa-miR-4763-5p	TAB1		hsa-miR-299-5p	STIM1
												hsa-miR-4692	TAB1		hsa-miR-29a	STIM1
												hsa-miR-590-3p	TAB1		hsa-miR-29a	STIM1
												hsa-miR-4786-5p	TAB1		hsa-miR-29b	STIM1
												hsa-miR-548l	TAB1		hsa-miR-29b	STIM1
												hsa-miR-4715-3p	TAB1		hsa-miR-29c	STIM1
												hsa-miR-147a	TAB1		hsa-miR-29c	STIM1
												hsa-miR-4286	TAB1		hsa-miR-320	STIM1
												hsa-miR-5691	TAB1		hsa-miR-320	STIM1
												hsa-miR-6805-3p	TAB1		hsa-miR-324-5p	STIM1
												hsa-miR-6834-5p	TAB1		hsa-miR-324-5p	STIM1
												hsa-miR-2467-3p	TAB1		hsa-miR-326	STIM1
												hsa-miR-5008-5p	TAB1		hsa-miR-326	STIM1
												hsa-miR-4758-3p	TAB1		hsa-miR-328	STIM1
												hsa-miR-4685-5p	TAB1		hsa-miR-328	STIM1
												hsa-miR-6837-5p	TAB1		hsa-miR-330	STIM1
												hsa-miR-4641	TAB1		hsa-miR-330	STIM1
												hsa-miR-6756-5p	TAB1		hsa-miR-331	STIM1
												hsa-miR-3921	TAB1		hsa-miR-331	STIM1
												hsa-miR-4303	TAB1		hsa-miR-331	STIM1
												hsa-miR-6766-5p	TAB1		hsa-miR-331	STIM1
												hsa-miR-4653-5p	TAB1		hsa-miR-335	STIM1
												hsa-miR-6829-5p	TAB1		hsa-miR-335	STIM1
												hsa-miR-1913	TAB1		hsa-miR-337	STIM1
												hsa-miR-4251	TAB1		hsa-miR-337	STIM1
												hsa-miR-4513	TAB1		hsa-miR-339	STIM1
												hsa-miR-324-3p	TAB1		hsa-miR-340	STIM1
												hsa-miR-6855-3p	TAB1		hsa-miR-340	STIM1
												hsa-miR-491-5p	TAB1		hsa-miR-342	STIM1
												hsa-miR-4267	TAB1		hsa-miR-342	STIM1
												hsa-miR-6077	TAB1		hsa-miR-346	STIM1
												hsa-miR-149-3p	TAB1		hsa-miR-346	STIM1
												hsa-miR-3689a-3p	TAB1		hsa-miR-34a	STIM1
												hsa-miR-3689c	TAB1		hsa-miR-34a	STIM1
												hsa-miR-504-5p	TAB1		hsa-miR-34b	STIM1
												hsa-miR-296-5p	TAB1		hsa-miR-34b	STIM1
												hsa-miR-6780a-5p	TAB1		hsa-miR-34c	STIM1
												hsa-miR-541-3p	TAB1		hsa-miR-34c	STIM1
												hsa-miR-30b-3p	TAB1		hsa-miR-362	STIM1
												hsa-miR-3689b-3p	TAB1		hsa-miR-362	STIM1
												hsa-miR-4725-5p	TAB1		hsa-miR-362	STIM1
												hsa-miR-654-5p	TAB1		hsa-miR-362	STIM1
												hsa-miR-6779-5p	TAB1		hsa-miR-363*	STIM1
												hsa-miR-1273h-5p	TAB1		hsa-miR-363*	STIM1
												hsa-miR-29a-3p	TAB1		hsa-miR-363*	STIM1
												hsa-miR-29b-3p	TAB1		hsa-miR-371	STIM1
												hsa-miR-1587	TAB1		hsa-miR-371	STIM1
												hsa-miR-134-5p	TAB1		hsa-miR-372	STIM1
												hsa-miR-6871-3p	TAB1		hsa-miR-372	STIM1
												hsa-miR-3118	TAB1		hsa-miR-373*	STIM1
												hsa-miR-3620-5p	TAB1		hsa-miR-373*	STIM1
												hsa-miR-29c-3p	TAB1		hsa-miR-376a	STIM1
												hsa-miR-671-5p	TAB1		hsa-miR-376a	STIM1
												hsa-miR-6872-3p	TAB1		hsa-miR-376b	STIM1
												hsa-miR-4651	TAB1		hsa-miR-376b	STIM1
												hsa-miR-1258	TAB1		hsa-miR-377	STIM1
												hsa-miR-4296	TAB1		hsa-miR-377	STIM1
												hsa-miR-510-5p	TAB1		hsa-miR-382	STIM1
												hsa-miR-1275	TAB1		hsa-miR-382	STIM1
												hsa-miR-4487	TAB1		hsa-miR-410	STIM1
												hsa-miR-4531	TAB1		hsa-miR-410	STIM1
															hsa-miR-412	STIM1
												hsa-miR-520d-5p	TAB2		hsa-miR-412	STIM1
												hsa-miR-3922-5p	TAB2		hsa-miR-412	STIM1
												hsa-miR-524-5p	TAB2		hsa-miR-422a	STIM1
												hsa-miR-676-3p	TAB2		hsa-miR-422a	STIM1
												hsa-let-7a-2-3p	TAB2		hsa-miR-422b	STIM1
												hsa-let-7g-3p	TAB2		hsa-miR-422b	STIM1
												hsa-miR-194-3p	TAB2		hsa-miR-423	STIM1
												hsa-miR-302c-5p	TAB2		hsa-miR-423	STIM1
												hsa-miR-7-5p	TAB2		hsa-miR-424	STIM1
												hsa-miR-6875-3p	TAB2		hsa-miR-424	STIM1
												hsa-miR-3620-5p	TAB2		hsa-miR-424	STIM1
												hsa-miR-1587	TAB2		hsa-miR-425-5p	STIM1
												hsa-miR-3125	TAB2		hsa-miR-425-5p	STIM1
												hsa-miR-3916	TAB2		hsa-miR-432	STIM1
												hsa-miR-6859-5p	TAB2		hsa-miR-432	STIM1
												hsa-miR-1284	TAB2		hsa-miR-449b	STIM1
												hsa-miR-134-3p	TAB2		hsa-miR-449b	STIM1
												hsa-miR-2355-3p	TAB2		hsa-miR-452	STIM1
												hsa-miR-4296	TAB2		hsa-miR-452	STIM1
												hsa-miR-3148	TAB2		hsa-miR-452*	STIM1
												hsa-miR-155-5p	TAB2		hsa-miR-453	STIM1
												hsa-miR-4656	TAB2		hsa-miR-454-5p	STIM1
												hsa-miR-6793-5p	TAB2		hsa-miR-454-5p	STIM1
												hsa-miR-205-3p	TAB2		hsa-miR-455	STIM1
												hsa-miR-767-3p	TAB2		hsa-miR-455	STIM1
												hsa-miR-922	TAB2		hsa-miR-483	STIM1
												hsa-miR-4255	TAB2		hsa-miR-483	STIM1
												hsa-miR-7162-3p	TAB2		hsa-miR-484	STIM1
												hsa-miR-651-3p	TAB2		hsa-miR-484	STIM1
												hsa-miR-3977	TAB2		hsa-miR-485-5p	STIM1
												hsa-miR-4775	TAB2		hsa-miR-485-5p	STIM1
												hsa-miR-377-5p	TAB2		hsa-miR-486	STIM1
												hsa-miR-6086	TAB2		hsa-miR-486	STIM1
												hsa-miR-548f-3p	TAB2		hsa-miR-489	STIM1
												hsa-miR-548a-3p	TAB2		hsa-miR-489	STIM1
												hsa-miR-627-3p	TAB2		hsa-miR-490	STIM1
												hsa-miR-4418	TAB2		hsa-miR-492	STIM1
												hsa-miR-509-3-5p	TAB2		hsa-miR-492	STIM1
												hsa-miR-4293	TAB2		hsa-miR-493-5p	STIM1
												hsa-miR-548e-3p	TAB2		hsa-miR-493-5p	STIM1
												hsa-miR-548ar-3p	TAB2		hsa-miR-497	STIM1
												hsa-miR-548az-3p	TAB2		hsa-miR-497	STIM1
												hsa-miR-509-5p	TAB2		hsa-miR-497	STIM1
												hsa-miR-124-5p	TAB2		hsa-miR-499	STIM1
												hsa-miR-4417	TAB2		hsa-miR-499	STIM1
												hsa-miR-1228-3p	TAB2		hsa-miR-501	STIM1
												hsa-miR-5003-3p	TAB2		hsa-miR-501	STIM1
												hsa-miR-202-3p	TAB2		hsa-miR-502	STIM1
												hsa-miR-5009-3p	TAB2		hsa-miR-502	STIM1
												hsa-miR-4322	TAB2		hsa-miR-502	STIM1
												hsa-miR-4265	TAB2		hsa-miR-503	STIM1
												hsa-miR-4643	TAB2		hsa-miR-503	STIM1
												hsa-miR-3667-3p	TAB2		hsa-miR-504	STIM1
												hsa-miR-4697-3p	TAB2		hsa-miR-504	STIM1
												hsa-miR-942-5p	TAB2		hsa-miR-506	STIM1
												hsa-miR-222-5p	TAB2		hsa-miR-506	STIM1
												hsa-miR-4475	TAB2		hsa-miR-507	STIM1
												hsa-miR-4291	TAB2		hsa-miR-507	STIM1
												hsa-miR-576-3p	TAB2		hsa-miR-510	STIM1
												hsa-miR-4311	TAB2		hsa-miR-510	STIM1
												hsa-miR-200a-3p	TAB2		hsa-miR-512-5p	STIM1
												hsa-miR-141-3p	TAB2		hsa-miR-512-5p	STIM1
												hsa-miR-5580-5p	TAB2		hsa-miR-513	STIM1
												hsa-miR-5700	TAB2		hsa-miR-513	STIM1
												hsa-miR-1302	TAB2		hsa-miR-515-3p	STIM1
												hsa-miR-4668-5p	TAB2		hsa-miR-515-5p	STIM1
												hsa-miR-4298	TAB2		hsa-miR-515-5p	STIM1
												hsa-miR-142-3p	TAB2		hsa-miR-516-5p	STIM1
												hsa-miR-527	TAB2		hsa-miR-516-5p	STIM1
												hsa-miR-518a-5p	TAB2		hsa-miR-518c	STIM1
												hsa-miR-8065	TAB2		hsa-miR-518c	STIM1
												hsa-miR-548am-3p	TAB2		hsa-miR-518c*	STIM1
												hsa-miR-548aj-3p	TAB2		hsa-miR-518c*	STIM1
												hsa-miR-548x-3p	TAB2		hsa-miR-518f	STIM1
												hsa-miR-548j-3p	TAB2		hsa-miR-518f*	STIM1
												hsa-miR-6847-3p	TAB2		hsa-miR-518f*	STIM1
												hsa-miR-6073	TAB2		hsa-miR-519d	STIM1
												hsa-miR-548ah-3p	TAB2		hsa-miR-519d	STIM1
												hsa-miR-3158-5p	TAB2		hsa-miR-520a	STIM1
												hsa-miR-548aq-3p	TAB2		hsa-miR-520a	STIM1
												hsa-miR-548ae-3p	TAB2		hsa-miR-524	STIM1
												hsa-miR-140-3p	TAB2		hsa-miR-524	STIM1
												hsa-miR-1911-5p	TAB2		hsa-miR-525	STIM1
												hsa-miR-6719-3p	TAB2		hsa-miR-525	STIM1
												hsa-miR-4708-5p	TAB2		hsa-miR-525*	STIM1
												hsa-miR-1256	TAB2		hsa-miR-525*	STIM1
												hsa-miR-639	TAB2		hsa-miR-526a	STIM1
[truncated: 543 more rows]

## Sheet: miRNA validation data
Experimental validation data of miRNAs targetting calcineuring/NFAT pathway (data from miRTarBase)
miRTarBase ID	miRNA	Species (miRNA)	Target Gene	Target Gene (Entrez Gene ID)	Species (Target Gene)	Experiments	Support Type	References (PMID)
MIRT000677	hsa-miR-145-5p	Homo sapiens	PPP3CA	5530	Homo sapiens	qRT-PCR//Luciferase reporter assay//Microarray//Reporter assay;Other	Functional MTI	19915607
MIRT002918	hsa-miR-124-3p	Homo sapiens	NFATC1	4772	Homo sapiens	Luciferase reporter assay//qRT-PCR//Western blot	Functional MTI	23853098
MIRT002918	hsa-miR-124-3p	Homo sapiens	NFATC1	4772	Homo sapiens	Microarray	Functional MTI (Weak)	18668037
MIRT003225	hsa-miR-424-5p	Homo sapiens	ITPR1	3708	Homo sapiens	Luciferase reporter assay	Non-Functional MTI	20065103
MIRT004676	hsa-miR-26a-5p	Homo sapiens	GSK3B	2932	Homo sapiens	Luciferase reporter assay//Microarray//qRT-PCR//Western blot	Functional MTI	20525681
MIRT004676	hsa-miR-26a-5p	Homo sapiens	GSK3B	2932	Homo sapiens	Immunoblot//Immunofluorescence//Immunoprecipitaion//Luciferase reporter assay//qRT-PCR	Functional MTI	22484120
MIRT004676	hsa-miR-26a-5p	Homo sapiens	GSK3B	2932	Homo sapiens	PAR-CLIP	Functional MTI (Weak)	20371350
MIRT004676	hsa-miR-26a-5p	Homo sapiens	GSK3B	2932	Homo sapiens	PAR-CLIP	Functional MTI (Weak)	21572407
MIRT005078	hsa-miR-184	Homo sapiens	NFATC2	4773	Homo sapiens	Luciferase reporter assay//qRT-PCR//Western blot	Functional MTI	19286996
MIRT005180	hsa-miR-30a-5p	Homo sapiens	PPP3R1	5534	Homo sapiens	pSILAC//Proteomics;Other	Functional MTI (Weak)	18668040
MIRT005198	hsa-miR-30a-5p	Homo sapiens	PPP3CA	5530	Homo sapiens	pSILAC//Proteomics;Other	Functional MTI (Weak)	18668040
MIRT005509	hsa-miR-10a-5p	Homo sapiens	MAP3K7	6885	Homo sapiens	Luciferase reporter assay//Microarray//qRT-PCR//Western blot//Reporter assay;Other	Functional MTI	20624982
MIRT006267	hsa-miR-155-5p	Homo sapiens	CSNK1A1	1452	Homo sapiens	Reporter assay;Other	Functional MTI	20584899
MIRT006267	hsa-miR-155-5p	Homo sapiens	CSNK1A1	1452	Homo sapiens	Luciferase reporter assay	Functional MTI	22350414
MIRT006267	hsa-miR-155-5p	Homo sapiens	CSNK1A1	1452	Homo sapiens	Proteomics	Functional MTI (Weak)	18668040
MIRT006267	hsa-miR-155-5p	Homo sapiens	CSNK1A1	1452	Homo sapiens	HITS-CLIP	Functional MTI (Weak)	22473208
MIRT006753	hsa-miR-29b-3p	Homo sapiens	GSK3B	2932	Homo sapiens	Luciferase reporter assay	Functional MTI	21501592
MIRT007191	hsa-miR-205-5p	Homo sapiens	LRRK2	120892	Homo sapiens	Luciferase reporter assay//qRT-PCR//Western blot	Functional MTI	23125283
MIRT016810	hsa-miR-335-5p	Homo sapiens	PPP3R2	5535	Homo sapiens	Microarray	Functional MTI (Weak)	18185580
MIRT017031	hsa-miR-335-5p	Homo sapiens	DYRK1A	1859	Homo sapiens	Microarray	Functional MTI (Weak)	18185580
MIRT017071	hsa-miR-335-5p	Homo sapiens	LRRK2	120892	Homo sapiens	Microarray	Functional MTI (Weak)	18185580
MIRT017604	hsa-miR-335-5p	Homo sapiens	ITPR1	3708	Homo sapiens	Microarray	Functional MTI (Weak)	18185580
MIRT019619	hsa-miR-340-5p	Homo sapiens	ITPR1	3708	Homo sapiens	Sequencing//PAR-CLIP	Functional MTI (Weak)	20371350
MIRT019619	hsa-miR-340-5p	Homo sapiens	ITPR1	3708	Homo sapiens	PAR-CLIP	Functional MTI (Weak)	21572407
MIRT019619	hsa-miR-340-5p	Homo sapiens	ITPR1	3708	Homo sapiens	PAR-CLIP	Functional MTI (Weak)	23592263
MIRT019932	hsa-miR-375	Homo sapiens	HOMER2	9455	Homo sapiens	Microarray	Functional MTI (Weak)	20215506
MIRT021044	hsa-miR-155-5p	Homo sapiens	GSK3B	2932	Homo sapiens	Proteomics	Functional MTI (Weak)	19289835
MIRT021178	hsa-miR-186-5p	Homo sapiens	CSNK1A1	1452	Homo sapiens	Sequencing	Functional MTI (Weak)	20371350
MIRT021368	hsa-miR-9-5p	Homo sapiens	NFATC3	4775	Homo sapiens	Microarray	Functional MTI (Weak)	17612493
MIRT022001	hsa-miR-128-3p	Homo sapiens	ITPR1	3708	Homo sapiens	Sequencing	Functional MTI (Weak)	20371350
MIRT024054	hsa-miR-1-3p	Homo sapiens	CALM1	801	Homo sapiens	Proteomics;Microarray	Functional MTI (Weak)	18668037
MIRT024054	hsa-miR-1-3p	Homo sapiens	CALM1	801	Homo sapiens	Proteomics	Functional MTI (Weak)	18668040
MIRT024657	hsa-miR-215-5p	Homo sapiens	DYRK1A	1859	Homo sapiens	Microarray	Functional MTI (Weak)	19074876
MIRT025005	hsa-miR-183-5p	Homo sapiens	PPP3R1	5534	Homo sapiens	Sequencing	Functional MTI (Weak)	20371350
MIRT025316	hsa-miR-34a-5p	Homo sapiens	MAP3K7	6885	Homo sapiens	Sequencing	Functional MTI (Weak)	20371350
MIRT025426	hsa-miR-34a-5p	Homo sapiens	PPP3R1	5534	Homo sapiens	Sequencing	Functional MTI (Weak)	20371350
MIRT026006	hsa-miR-148a-3p	Homo sapiens	DYRK1A	1859	Homo sapiens	Sequencing	Functional MTI (Weak)	20371350
MIRT026227	hsa-miR-192-5p	Homo sapiens	DYRK1A	1859	Homo sapiens	Microarray	Functional MTI (Weak)	19074876
MIRT027011	hsa-miR-103a-3p	Homo sapiens	MAP3K7	6885	Homo sapiens	Sequencing//PAR-CLIP	Functional MTI (Weak)	20371350
MIRT027011	hsa-miR-103a-3p	Homo sapiens	MAP3K7	6885	Homo sapiens	PAR-CLIP	Functional MTI (Weak)	23446348
MIRT028366	hsa-miR-32-5p	Homo sapiens	ITPR1	3708	Homo sapiens	Sequencing//PAR-CLIP	Functional MTI (Weak)	20371350
MIRT028366	hsa-miR-32-5p	Homo sapiens	ITPR1	3708	Homo sapiens	PAR-CLIP	Functional MTI (Weak)	21572407
MIRT028366	hsa-miR-32-5p	Homo sapiens	ITPR1	3708	Homo sapiens	HITS-CLIP	Functional MTI (Weak)	22473208
MIRT028366	hsa-miR-32-5p	Homo sapiens	ITPR1	3708	Homo sapiens	PAR-CLIP	Functional MTI (Weak)	23592263
MIRT029184	hsa-miR-26b-5p	Homo sapiens	AKAP5	9495	Homo sapiens	Microarray	Functional MTI (Weak)	19088304
MIRT029303	hsa-miR-26b-5p	Homo sapiens	PPP3R1	5534	Homo sapiens	Sequencing	Functional MTI (Weak)	20371350
MIRT030457	hsa-miR-24-3p	Homo sapiens	PPP3R1	5534	Homo sapiens	Sequencing	Functional MTI (Weak)	20371350
MIRT030896	hsa-miR-21-5p	Homo sapiens	CSNK1A1	1452	Homo sapiens	Microarray	Functional MTI (Weak)	18591254
MIRT035764	hsa-miR-103a-2-5p	Homo sapiens	HOMER2	9455	Homo sapiens	CLASH	Functional MTI (Weak)	23622248
MIRT036421	hsa-miR-1226-3p	Homo sapiens	CABIN1	23523	Homo sapiens	CLASH	Functional MTI (Weak)	23622248
MIRT036539	hsa-miR-1226-5p	Homo sapiens	MAP3K7	6885	Homo sapiens	CLASH	Functional MTI (Weak)	23622248
MIRT036842	hsa-miR-877-3p	Homo sapiens	GSK3B	2932	Homo sapiens	CLASH	Functional MTI (Weak)	23622248
MIRT037913	hsa-miR-532-3p	Homo sapiens	PPP3R2	5535	Homo sapiens	CLASH	Functional MTI (Weak)	23622248
MIRT037914	hsa-miR-532-3p	Homo sapiens	PPP3R1	5534	Homo sapiens	CLASH	Functional MTI (Weak)	23622248
MIRT038275	hsa-miR-361-3p	Homo sapiens	NFATC3	4775	Homo sapiens	CLASH	Functional MTI (Weak)	23622248
MIRT039319	hsa-miR-425-5p	Homo sapiens	GSK3B	2932	Homo sapiens	CLASH	Functional MTI (Weak)	23622248
MIRT039466	hsa-miR-652-3p	Homo sapiens	CSNK1A1	1452	Homo sapiens	CLASH	Functional MTI (Weak)	23622248
MIRT042900	hsa-miR-324-3p	Homo sapiens	CSNK1A1	1452	Homo sapiens	CLASH	Functional MTI (Weak)	23622248
MIRT042979	hsa-miR-324-3p	Homo sapiens	NFATC3	4775	Homo sapiens	CLASH	Functional MTI (Weak)	23622248
MIRT043199	hsa-miR-324-5p	Homo sapiens	DYRK1A	1859	Homo sapiens	CLASH	Functional MTI (Weak)	23622248
MIRT043612	hsa-miR-151a-3p	Homo sapiens	CABIN1	23523	Homo sapiens	CLASH	Functional MTI (Weak)	23622248
MIRT044178	hsa-miR-99b-5p	Homo sapiens	DYRK1A	1859	Homo sapiens	CLASH	Functional MTI (Weak)	23622248
MIRT044682	hsa-miR-320a	Homo sapiens	CABIN1	23523	Homo sapiens	CLASH	Functional MTI (Weak)	23622248
MIRT047460	hsa-miR-10b-5p	Homo sapiens	PPP3CB	5532	Homo sapiens	CLASH	Functional MTI (Weak)	23622248
MIRT049345	hsa-miR-92a-3p	Homo sapiens	GSK3B	2932	Homo sapiens	CLASH	Functional MTI (Weak)	23622248
MIRT049774	hsa-miR-92a-3p	Homo sapiens	DYRK1A	1859	Homo sapiens	CLASH	Functional MTI (Weak)	23622248
MIRT050262	hsa-miR-25-3p	Homo sapiens	CABIN1	23523	Homo sapiens	CLASH	Functional MTI (Weak)	23622248
MIRT051109	hsa-miR-16-5p	Homo sapiens	CABIN1	23523	Homo sapiens	CLASH	Functional MTI (Weak)	23622248
MIRT051235	hsa-miR-16-5p	Homo sapiens	MAP3K7	6885	Homo sapiens	PAR-CLIP	Functional MTI (Weak)	20371350
MIRT051235	hsa-miR-16-5p	Homo sapiens	MAP3K7	6885	Homo sapiens	CLASH	Functional MTI (Weak)	23622248
MIRT051340	hsa-miR-15a-5p	Homo sapiens	CABIN1	23523	Homo sapiens	CLASH	Functional MTI (Weak)	23622248
MIRT052157	hsa-let-7b-5p	Homo sapiens	NFATC1	4772	Homo sapiens	CLASH	Functional MTI (Weak)	23622248
MIRT052288	hsa-let-7b-5p	Homo sapiens	NFATC3	4775	Homo sapiens	CLASH	Functional MTI (Weak)	23622248
MIRT053196	hsa-miR-181a-5p	Homo sapiens	PPP3CA	5530	Homo sapiens	Luciferase reporter assay	Functional MTI	23677691
MIRT053626	hsa-let-7f-5p	Homo sapiens	CALM1	801	Homo sapiens	Microarray	Functional MTI (Weak)	22942087
MIRT053639	hsa-miR-143-3p	Homo sapiens	MAP3K7	6885	Homo sapiens	Microarray	Functional MTI (Weak)	22942087
MIRT053774	hsa-miR-1246	Homo sapiens	DYRK1A	1859	Homo sapiens	ChIP-seq//Flow//Microarray//qRT-PCR//Western blot	Functional MTI	24861464
MIRT053782	hsa-miR-183-5p	Homo sapiens	GSK3B	2932	Homo sapiens	Immunohistochemistry//Luciferase reporter assay//Microarray//qRT-PCR//Western blot	Functional MTI	24335145
MIRT053783	hsa-miR-96-5p	Homo sapiens	GSK3B	2932	Homo sapiens	Immunohistochemistry//Luciferase reporter assay//Microarray//qRT-PCR//Western blot	Functional MTI	24335145
MIRT053784	hsa-miR-182-5p	Homo sapiens	GSK3B	2932	Homo sapiens	Immunohistochemistry//Luciferase reporter assay//Microarray//qRT-PCR//Western blot	Functional MTI	24335145
MIRT071460	hsa-miR-129-5p	Homo sapiens	CALM1	801	Homo sapiens	PAR-CLIP	Functional MTI (Weak)	20371350
MIRT071460	hsa-miR-129-5p	Homo sapiens	CALM1	801	Homo sapiens	PAR-CLIP	Functional MTI (Weak)	21572407
MIRT071460	hsa-miR-129-5p	Homo sapiens	CALM1	801	Homo sapiens	PAR-CLIP	Functional MTI (Weak)	23446348
MIRT071461	hsa-miR-450b-5p	Homo sapiens	CALM1	801	Homo sapiens	PAR-CLIP	Functional MTI (Weak)	20371350
MIRT071461	hsa-miR-450b-5p	Homo sapiens	CALM1	801	Homo sapiens	PAR-CLIP	Functional MTI (Weak)	21572407
MIRT071461	hsa-miR-450b-5p	Homo sapiens	CALM1	801	Homo sapiens	PAR-CLIP	Functional MTI (Weak)	23446348
MIRT071480	hsa-miR-19a-3p	Homo sapiens	CALM1	801	Homo sapiens	PAR-CLIP	Functional MTI (Weak)	21572407
MIRT071481	hsa-miR-19b-3p	Homo sapiens	CALM1	801	Homo sapiens	PAR-CLIP	Functional MTI (Weak)	21572407
MIRT071490	hsa-miR-579-3p	Homo sapiens	CALM1	801	Homo sapiens	PAR-CLIP	Functional MTI (Weak)	21572407
MIRT071491	hsa-miR-595	Homo sapiens	CALM1	801	Homo sapiens	PAR-CLIP	Functional MTI (Weak)	21572407
MIRT071492	hsa-miR-548c-3p	Homo sapiens	CALM1	801	Homo sapiens	PAR-CLIP	Functional MTI (Weak)	20371350
MIRT071492	hsa-miR-548c-3p	Homo sapiens	CALM1	801	Homo sapiens	PAR-CLIP	Functional MTI (Weak)	21572407
MIRT071492	hsa-miR-548c-3p	Homo sapiens	CALM1	801	Homo sapiens	PAR-CLIP	Functional MTI (Weak)	23446348
MIRT071493	hsa-miR-648	Homo sapiens	CALM1	801	Homo sapiens	PAR-CLIP	Functional MTI (Weak)	21572407
MIRT071494	hsa-miR-664a-3p	Homo sapiens	CALM1	801	Homo sapiens	PAR-CLIP	Functional MTI (Weak)	21572407
MIRT071497	hsa-miR-4760-3p	Homo sapiens	CALM1	801	Homo sapiens	PAR-CLIP	Functional MTI (Weak)	21572407
MIRT071499	hsa-miR-664b-3p	Homo sapiens	CALM1	801	Homo sapiens	PAR-CLIP	Functional MTI (Weak)	21572407
MIRT071500	hsa-miR-548aw	Homo sapiens	CALM1	801	Homo sapiens	PAR-CLIP	Functional MTI (Weak)	21572407
MIRT071501	hsa-let-7c-3p	Homo sapiens	CALM1	801	Homo sapiens	PAR-CLIP	Functional MTI (Weak)	20371350
MIRT071501	hsa-let-7c-3p	Homo sapiens	CALM1	801	Homo sapiens	PAR-CLIP	Functional MTI (Weak)	21572407
MIRT071501	hsa-let-7c-3p	Homo sapiens	CALM1	801	Homo sapiens	PAR-CLIP	Functional MTI (Weak)	23446348
MIRT071502	hsa-miR-340-5p	Homo sapiens	CALM1	801	Homo sapiens	PAR-CLIP	Functional MTI (Weak)	20371350
MIRT071503	hsa-miR-3123	Homo sapiens	CALM1	801	Homo sapiens	PAR-CLIP	Functional MTI (Weak)	20371350
MIRT071503	hsa-miR-3123	Homo sapiens	CALM1	801	Homo sapiens	PAR-CLIP	Functional MTI (Weak)	21572407
MIRT071503	hsa-miR-3123	Homo sapiens	CALM1	801	Homo sapiens	PAR-CLIP	Functional MTI (Weak)	23446348
MIRT071504	hsa-miR-4311	Homo sapiens	CALM1	801	Homo sapiens	PAR-CLIP	Functional MTI (Weak)	20371350
MIRT071504	hsa-miR-4311	Homo sapiens	CALM1	801	Homo sapiens	PAR-CLIP	Functional MTI (Weak)	21572407
MIRT071504	hsa-miR-4311	Homo sapiens	CALM1	801	Homo sapiens	PAR-CLIP	Functional MTI (Weak)	23446348
MIRT071507	hsa-miR-4729	Homo sapiens	CALM1	801	Homo sapiens	PAR-CLIP	Functional MTI (Weak)	20371350
MIRT071507	hsa-miR-4729	Homo sapiens	CALM1	801	Homo sapiens	PAR-CLIP	Functional MTI (Weak)	21572407
MIRT071507	hsa-miR-4729	Homo sapiens	CALM1	801	Homo sapiens	PAR-CLIP	Functional MTI (Weak)	23446348
MIRT071515	hsa-miR-539-5p	Homo sapiens	CALM1	801	Homo sapiens	HITS-CLIP	Functional MTI (Weak)	24374217
MIRT075201	hsa-miR-548l	Homo sapiens	NFATC3	4775	Homo sapiens	PAR-CLIP	Functional MTI (Weak)	20371350
MIRT075202	hsa-miR-548n	Homo sapiens	NFATC3	4775	Homo sapiens	PAR-CLIP	Functional MTI (Weak)	20371350
MIRT085345	hsa-miR-224-3p	Homo sapiens	DYRK1A	1859	Homo sapiens	PAR-CLIP	Functional MTI (Weak)	20371350
MIRT085345	hsa-miR-224-3p	Homo sapiens	DYRK1A	1859	Homo sapiens	PAR-CLIP	Functional MTI (Weak)	21572407
MIRT085345	hsa-miR-224-3p	Homo sapiens	DYRK1A	1859	Homo sapiens	PAR-CLIP	Functional MTI (Weak)	23446348
MIRT085346	hsa-miR-522-3p	Homo sapiens	DYRK1A	1859	Homo sapiens	PAR-CLIP	Functional MTI (Weak)	20371350
MIRT085346	hsa-miR-522-3p	Homo sapiens	DYRK1A	1859	Homo sapiens	PAR-CLIP	Functional MTI (Weak)	21572407
MIRT085346	hsa-miR-522-3p	Homo sapiens	DYRK1A	1859	Homo sapiens	PAR-CLIP	Functional MTI (Weak)	23446348
MIRT085347	hsa-miR-620	Homo sapiens	DYRK1A	1859	Homo sapiens	PAR-CLIP	Functional MTI (Weak)	20371350
MIRT085347	hsa-miR-620	Homo sapiens	DYRK1A	1859	Homo sapiens	PAR-CLIP	Functional MTI (Weak)	21572407
MIRT085347	hsa-miR-620	Homo sapiens	DYRK1A	1859	Homo sapiens	PAR-CLIP	Functional MTI (Weak)	23446348
MIRT085348	hsa-miR-2113	Homo sapiens	DYRK1A	1859	Homo sapiens	PAR-CLIP	Functional MTI (Weak)	20371350
MIRT085348	hsa-miR-2113	Homo sapiens	DYRK1A	1859	Homo sapiens	PAR-CLIP	Functional MTI (Weak)	21572407
MIRT085348	hsa-miR-2113	Homo sapiens	DYRK1A	1859	Homo sapiens	PAR-CLIP	Functional MTI (Weak)	23446348
MIRT085349	hsa-miR-298	Homo sapiens	DYRK1A	1859	Homo sapiens	PAR-CLIP	Functional MTI (Weak)	20371350
MIRT085350	hsa-miR-1270	Homo sapiens	DYRK1A	1859	Homo sapiens	PAR-CLIP	Functional MTI (Weak)	20371350
MIRT085350	hsa-miR-1270	Homo sapiens	DYRK1A	1859	Homo sapiens	PAR-CLIP	Functional MTI (Weak)	21572407
MIRT085350	hsa-miR-1270	Homo sapiens	DYRK1A	1859	Homo sapiens	PAR-CLIP	Functional MTI (Weak)	23446348
MIRT085353	hsa-miR-5680	Homo sapiens	DYRK1A	1859	Homo sapiens	PAR-CLIP	Functional MTI (Weak)	20371350
MIRT085353	hsa-miR-5680	Homo sapiens	DYRK1A	1859	Homo sapiens	PAR-CLIP	Functional MTI (Weak)	21572407
MIRT085353	hsa-miR-5680	Homo sapiens	DYRK1A	1859	Homo sapiens	PAR-CLIP	Functional MTI (Weak)	23446348
MIRT085355	hsa-miR-6880-5p	Homo sapiens	DYRK1A	1859	Homo sapiens	PAR-CLIP	Functional MTI (Weak)	20371350
MIRT085355	hsa-miR-6880-5p	Homo sapiens	DYRK1A	1859	Homo sapiens	PAR-CLIP	Functional MTI (Weak)	21572407
MIRT085355	hsa-miR-6880-5p	Homo sapiens	DYRK1A	1859	Homo sapiens	PAR-CLIP	Functional MTI (Weak)	23446348
MIRT092181	hsa-miR-25-3p	Homo sapiens	ITPR1	3708	Homo sapiens	PAR-CLIP	Functional MTI (Weak)	20371350
MIRT092181	hsa-miR-25-3p	Homo sapiens	ITPR1	3708	Homo sapiens	PAR-CLIP	Functional MTI (Weak)	21572407
MIRT092181	hsa-miR-25-3p	Homo sapiens	ITPR1	3708	Homo sapiens	PAR-CLIP	Functional MTI (Weak)	23592263
MIRT092182	hsa-miR-92a-3p	Homo sapiens	ITPR1	3708	Homo sapiens	PAR-CLIP	Functional MTI (Weak)	20371350
MIRT092182	hsa-miR-92a-3p	Homo sapiens	ITPR1	3708	Homo sapiens	PAR-CLIP	Functional MTI (Weak)	21572407
MIRT092182	hsa-miR-92a-3p	Homo sapiens	ITPR1	3708	Homo sapiens	HITS-CLIP	Functional MTI (Weak)	22473208
MIRT092182	hsa-miR-92a-3p	Homo sapiens	ITPR1	3708	Homo sapiens	PAR-CLIP	Functional MTI (Weak)	23592263
MIRT092184	hsa-miR-363-3p	Homo sapiens	ITPR1	3708	Homo sapiens	PAR-CLIP	Functional MTI (Weak)	20371350
MIRT092184	hsa-miR-363-3p	Homo sapiens	ITPR1	3708	Homo sapiens	PAR-CLIP	Functional MTI (Weak)	21572407
MIRT092184	hsa-miR-363-3p	Homo sapiens	ITPR1	3708	Homo sapiens	PAR-CLIP	Functional MTI (Weak)	23592263
MIRT092185	hsa-miR-367-3p	Homo sapiens	ITPR1	3708	Homo sapiens	PAR-CLIP	Functional MTI (Weak)	20371350
MIRT092185	hsa-miR-367-3p	Homo sapiens	ITPR1	3708	Homo sapiens	PAR-CLIP	Functional MTI (Weak)	21572407
MIRT092185	hsa-miR-367-3p	Homo sapiens	ITPR1	3708	Homo sapiens	PAR-CLIP	Functional MTI (Weak)	23592263
MIRT092186	hsa-miR-92b-3p	Homo sapiens	ITPR1	3708	Homo sapiens	PAR-CLIP	Functional MTI (Weak)	20371350
MIRT092186	hsa-miR-92b-3p	Homo sapiens	ITPR1	3708	Homo sapiens	PAR-CLIP	Functional MTI (Weak)	21572407
MIRT092186	hsa-miR-92b-3p	Homo sapiens	ITPR1	3708	Homo sapiens	HITS-CLIP	Functional MTI (Weak)	22473208
MIRT092186	hsa-miR-92b-3p	Homo sapiens	ITPR1	3708	Homo sapiens	PAR-CLIP	Functional MTI (Weak)	23592263
MIRT092187	hsa-miR-4328	Homo sapiens	ITPR1	3708	Homo sapiens	PAR-CLIP	Functional MTI (Weak)	20371350
MIRT092187	hsa-miR-4328	Homo sapiens	ITPR1	3708	Homo sapiens	PAR-CLIP	Functional MTI (Weak)	21572407
MIRT092187	hsa-miR-4328	Homo sapiens	ITPR1	3708	Homo sapiens	PAR-CLIP	Functional MTI (Weak)	23592263
MIRT092189	hsa-miR-4803	Homo sapiens	ITPR1	3708	Homo sapiens	PAR-CLIP	Functional MTI (Weak)	20371350
MIRT092189	hsa-miR-4803	Homo sapiens	ITPR1	3708	Homo sapiens	PAR-CLIP	Functional MTI (Weak)	21572407
MIRT092189	hsa-miR-4803	Homo sapiens	ITPR1	3708	Homo sapiens	PAR-CLIP	Functional MTI (Weak)	23592263
MIRT092190	hsa-miR-15a-5p	Homo sapiens	ITPR1	3708	Homo sapiens	HITS-CLIP	Functional MTI (Weak)	22473208
MIRT092191	hsa-miR-16-5p	Homo sapiens	ITPR1	3708	Homo sapiens	HITS-CLIP	Functional MTI (Weak)	22473208
MIRT092194	hsa-miR-15b-5p	Homo sapiens	ITPR1	3708	Homo sapiens	HITS-CLIP	Functional MTI (Weak)	22473208
MIRT092195	hsa-miR-195-5p	Homo sapiens	ITPR1	3708	Homo sapiens	HITS-CLIP	Functional MTI (Weak)	22473208
MIRT114796	hsa-miR-586	Homo sapiens	CALM1	801	Homo sapiens	PAR-CLIP	Functional MTI (Weak)	20371350
MIRT114796	hsa-miR-586	Homo sapiens	CALM1	801	Homo sapiens	PAR-CLIP	Functional MTI (Weak)	21572407
MIRT114796	hsa-miR-586	Homo sapiens	CALM1	801	Homo sapiens	PAR-CLIP	Functional MTI (Weak)	23446348
MIRT120263	hsa-let-7a-3p	Homo sapiens	GSK3B	2932	Homo sapiens	PAR-CLIP	Functional MTI (Weak)	20371350
MIRT120264	hsa-let-7b-3p	Homo sapiens	GSK3B	2932	Homo sapiens	PAR-CLIP	Functional MTI (Weak)	20371350
MIRT120265	hsa-let-7f-1-3p	Homo sapiens	GSK3B	2932	Homo sapiens	PAR-CLIP	Functional MTI (Weak)	20371350
MIRT120266	hsa-let-7f-2-3p	Homo sapiens	GSK3B	2932	Homo sapiens	PAR-CLIP	Functional MTI (Weak)	20371350
MIRT120266	hsa-let-7f-2-3p	Homo sapiens	GSK3B	2932	Homo sapiens	PAR-CLIP	Functional MTI (Weak)	21572407
MIRT120267	hsa-miR-98-3p	Homo sapiens	GSK3B	2932	Homo sapiens	PAR-CLIP	Functional MTI (Weak)	20371350
MIRT120269	hsa-miR-190a-3p	Homo sapiens	GSK3B	2932	Homo sapiens	PAR-CLIP	Functional MTI (Weak)	21572407
MIRT120269	hsa-miR-190a-3p	Homo sapiens	GSK3B	2932	Homo sapiens	PAR-CLIP	Functional MTI (Weak)	22012620
MIRT120269	hsa-miR-190a-3p	Homo sapiens	GSK3B	2932	Homo sapiens	HITS-CLIP	Functional MTI (Weak)	23313552
MIRT120269	hsa-miR-190a-3p	Homo sapiens	GSK3B	2932	Homo sapiens	PAR-CLIP	Functional MTI (Weak)	23446348
MIRT120272	hsa-miR-1185-2-3p	Homo sapiens	GSK3B	2932	Homo sapiens	PAR-CLIP	Functional MTI (Weak)	20371350
MIRT120272	hsa-miR-1185-2-3p	Homo sapiens	GSK3B	2932	Homo sapiens	PAR-CLIP	Functional MTI (Weak)	21572407
MIRT120273	hsa-miR-1185-1-3p	Homo sapiens	GSK3B	2932	Homo sapiens	PAR-CLIP	Functional MTI (Weak)	20371350
MIRT120273	hsa-miR-1185-1-3p	Homo sapiens	GSK3B	2932	Homo sapiens	PAR-CLIP	Functional MTI (Weak)	21572407
MIRT120275	hsa-miR-4789-5p	Homo sapiens	GSK3B	2932	Homo sapiens	PAR-CLIP	Functional MTI (Weak)	20371350
MIRT120275	hsa-miR-4789-5p	Homo sapiens	GSK3B	2932	Homo sapiens	PAR-CLIP	Functional MTI (Weak)	21572407
MIRT120276	hsa-miR-5011-5p	Homo sapiens	GSK3B	2932	Homo sapiens	PAR-CLIP	Functional MTI (Weak)	21572407
MIRT120276	hsa-miR-5011-5p	Homo sapiens	GSK3B	2932	Homo sapiens	PAR-CLIP	Functional MTI (Weak)	22012620
MIRT120276	hsa-miR-5011-5p	Homo sapiens	GSK3B	2932	Homo sapiens	HITS-CLIP	Functional MTI (Weak)	23313552
MIRT120276	hsa-miR-5011-5p	Homo sapiens	GSK3B	2932	Homo sapiens	PAR-CLIP	Functional MTI (Weak)	23446348
MIRT133312	hsa-miR-17-5p	Homo sapiens	ORAI1	84876	Homo sapiens	HITS-CLIP	Functional MTI (Weak)	22473208
MIRT133313	hsa-miR-20a-5p	Homo sapiens	ORAI1	84876	Homo sapiens	HITS-CLIP	Functional MTI (Weak)	22473208
MIRT133314	hsa-miR-93-5p	Homo sapiens	ORAI1	84876	Homo sapiens	HITS-CLIP	Functional MTI (Weak)	22473208
MIRT133316	hsa-miR-106b-5p	Homo sapiens	ORAI1	84876	Homo sapiens	HITS-CLIP	Functional MTI (Weak)	22473208
MIRT133317	hsa-miR-20b-5p	Homo sapiens	ORAI1	84876	Homo sapiens	HITS-CLIP	Functional MTI (Weak)	22473208
MIRT133321	hsa-miR-519d-3p	Homo sapiens	ORAI1	84876	Homo sapiens	HITS-CLIP	Functional MTI (Weak)	22473208
MIRT159806	hsa-miR-5189-3p	Homo sapiens	PPP3R1	5534	Homo sapiens	PAR-CLIP	Functional MTI (Weak)	22100165
MIRT159806	hsa-miR-5189-3p	Homo sapiens	PPP3R1	5534	Homo sapiens	HITS-CLIP	Functional MTI (Weak)	23824327
MIRT162697	hsa-miR-19a-3p	Homo sapiens	ITPR1	3708	Homo sapiens	HITS-CLIP	Functional MTI (Weak)	22473208
MIRT162698	hsa-miR-19b-3p	Homo sapiens	ITPR1	3708	Homo sapiens	HITS-CLIP	Functional MTI (Weak)	22473208
MIRT162735	hsa-miR-204-5p	Homo sapiens	ITPR1	3708	Homo sapiens	qRT-PCR//Western blot	Functional MTI	24960059
MIRT162736	hsa-miR-211-5p	Homo sapiens	ITPR1	3708	Homo sapiens	qRT-PCR//Western blot	Functional MTI	24960059
MIRT191923	hsa-miR-196a-5p	Homo sapiens	CALM1	801	Homo sapiens	PAR-CLIP	Functional MTI (Weak)	21572407
MIRT191924	hsa-miR-196b-5p	Homo sapiens	CALM1	801	Homo sapiens	PAR-CLIP	Functional MTI (Weak)	21572407
MIRT191943	hsa-miR-495-5p	Homo sapiens	CALM1	801	Homo sapiens	PAR-CLIP	Functional MTI (Weak)	20371350
MIRT191943	hsa-miR-495-5p	Homo sapiens	CALM1	801	Homo sapiens	PAR-CLIP	Functional MTI (Weak)	23446348
MIRT191944	hsa-miR-1305	Homo sapiens	CALM1	801	Homo sapiens	PAR-CLIP	Functional MTI (Weak)	20371350
MIRT191944	hsa-miR-1305	Homo sapiens	CALM1	801	Homo sapiens	PAR-CLIP	Functional MTI (Weak)	23446348
MIRT191945	hsa-miR-1250-3p	Homo sapiens	CALM1	801	Homo sapiens	PAR-CLIP	Functional MTI (Weak)	20371350
MIRT191945	hsa-miR-1250-3p	Homo sapiens	CALM1	801	Homo sapiens	PAR-CLIP	Functional MTI (Weak)	23446348
MIRT203408	hsa-miR-26a-5p	Homo sapiens	DYRK1A	1859	Homo sapiens	HITS-CLIP	Functional MTI (Weak)	22473208
MIRT203409	hsa-miR-26b-5p	Homo sapiens	DYRK1A	1859	Homo sapiens	HITS-CLIP	Functional MTI (Weak)	22473208
MIRT203435	hsa-miR-455-5p	Homo sapiens	DYRK1A	1859	Homo sapiens	HITS-CLIP	Functional MTI (Weak)	23824327
MIRT280390	hsa-miR-511-3p	Homo sapiens	CALM1	801	Homo sapiens	PAR-CLIP	Functional MTI (Weak)	21572407
MIRT284753	hsa-miR-185-5p	Homo sapiens	NFATC3	4775	Homo sapiens	Luciferase reporter assay//qRT-PCR//Western blot	Functional MTI	24014023
MIRT303230	hsa-miR-33a-3p	Homo sapiens	PPP3R1	5534	Homo sapiens	PAR-CLIP	Functional MTI (Weak)	20371350
MIRT303230	hsa-miR-33a-3p	Homo sapiens	PPP3R1	5534	Homo sapiens	PAR-CLIP	Functional MTI (Weak)	23446348
MIRT303233	hsa-miR-409-3p	Homo sapiens	PPP3R1	5534	Homo sapiens	PAR-CLIP	Functional MTI (Weak)	20371350
MIRT303233	hsa-miR-409-3p	Homo sapiens	PPP3R1	5534	Homo sapiens	PAR-CLIP	Functional MTI (Weak)	23446348
MIRT312451	hsa-miR-548e-5p	Homo sapiens	CSNK1A1	1452	Homo sapiens	PAR-CLIP	Functional MTI (Weak)	20371350
MIRT312451	hsa-miR-548e-5p	Homo sapiens	CSNK1A1	1452	Homo sapiens	PAR-CLIP	Functional MTI (Weak)	23446348
MIRT312451	hsa-miR-548e-5p	Homo sapiens	CSNK1A1	1452	Homo sapiens	PAR-CLIP	Functional MTI (Weak)	23592263
MIRT312454	hsa-miR-6835-3p	Homo sapiens	CSNK1A1	1452	Homo sapiens	PAR-CLIP	Functional MTI (Weak)	20371350
MIRT312454	hsa-miR-6835-3p	Homo sapiens	CSNK1A1	1452	Homo sapiens	PAR-CLIP	Functional MTI (Weak)	23446348
MIRT312454	hsa-miR-6835-3p	Homo sapiens	CSNK1A1	1452	Homo sapiens	PAR-CLIP	Functional MTI (Weak)	23592263
MIRT343790	hsa-miR-7975	Homo sapiens	NFATC3	4775	Homo sapiens	PAR-CLIP	Functional MTI (Weak)	20371350
MIRT351232	hsa-miR-2682-3p	Homo sapiens	DYRK1A	1859	Homo sapiens	HITS-CLIP	Functional MTI (Weak)	19536157
MIRT351232	hsa-miR-2682-3p	Homo sapiens	DYRK1A	1859	Homo sapiens	HITS-CLIP	Functional MTI (Weak)	23824327
MIRT351238	hsa-miR-6781-3p	Homo sapiens	DYRK1A	1859	Homo sapiens	HITS-CLIP	Functional MTI (Weak)	19536157
MIRT351238	hsa-miR-6781-3p	Homo sapiens	DYRK1A	1859	Homo sapiens	HITS-CLIP	Functional MTI (Weak)	23824327
MIRT405875	hsa-miR-548a-3p	Homo sapiens	CALM1	801	Homo sapiens	PAR-CLIP	Functional MTI (Weak)	21572407
MIRT405876	hsa-miR-548e-3p	Homo sapiens	CALM1	801	Homo sapiens	PAR-CLIP	Functional MTI (Weak)	21572407
MIRT405877	hsa-miR-548f-3p	Homo sapiens	CALM1	801	Homo sapiens	PAR-CLIP	Functional MTI (Weak)	21572407
MIRT405879	hsa-miR-548ar-3p	Homo sapiens	CALM1	801	Homo sapiens	PAR-CLIP	Functional MTI (Weak)	21572407
MIRT405880	hsa-miR-548az-3p	Homo sapiens	CALM1	801	Homo sapiens	PAR-CLIP	Functional MTI (Weak)	21572407
MIRT437488	hsa-miR-346	Homo sapiens	GSK3B	2932	Homo sapiens	Immunofluorescence//Luciferase reporter assay//qRT-PCR//Western blot	Functional MTI	24023731
MIRT438272	hsa-miR-320a	Homo sapiens	NFATC3	4775	Homo sapiens	Luciferase reporter assay//qRT-PCR//Western blot	Functional MTI	25159093
MIRT438543	hsa-miR-145-5p	Homo sapiens	NFATC1	4772	Homo sapiens	Luciferase reporter assay	Functional MTI	24043548
MIRT438593	hsa-miR-199a-5p	Homo sapiens	GSK3B	2932	Homo sapiens	ChIP-seq//FACS//Immunofluorescence//Immunohistochemistry//Luciferase reporter assay//Microarray//qRT-PCR//Western blot	Functional MTI	23764775
MIRT438771	hsa-miR-494-3p	Homo sapiens	ITPR1	3708	Homo sapiens	qRT-PCR//Western blot	Functional MTI	24960059
MIRT438773	hsa-miR-34c-5p	Homo sapiens	ITPR1	3708	Homo sapiens	qRT-PCR//Western blot	Functional MTI	24960059
MIRT438776	hsa-miR-34b-3p	Homo sapiens	ITPR1	3708	Homo sapiens	qRT-PCR//Western blot	Functional MTI	24960059
MIRT438777	hsa-miR-449a	Homo sapiens	ITPR1	3708	Homo sapiens	qRT-PCR//Western blot	Functional MTI	24960059
MIRT438780	hsa-miR-448	Homo sapiens	ITPR1	3708	Homo sapiens	qRT-PCR//Western blot	Functional MTI	24960059
MIRT438822	hsa-miR-582-3p	Homo sapiens	LRRK2	120892	Homo sapiens	qRT-PCR	Functional MTI (Weak)	23295946
MIRT438831	hsa-miR-582-5p	Homo sapiens	LRRK2	120892	Homo sapiens	qRT-PCR	Functional MTI (Weak)	23295946
MIRT439908	hsa-miR-376a-3p	Homo sapiens	PPP3R1	5534	Homo sapiens	HITS-CLIP	Functional MTI (Weak)	24374217
MIRT439909	hsa-miR-369-3p	Homo sapiens	PPP3R1	5534	Homo sapiens	HITS-CLIP	Functional MTI (Weak)	24374217
MIRT439910	hsa-miR-20a-5p	Homo sapiens	PPP3R1	5534	Homo sapiens	HITS-CLIP	Functional MTI (Weak)	22473208
MIRT439911	hsa-miR-106b-5p	Homo sapiens	PPP3R1	5534	Homo sapiens	HITS-CLIP	Functional MTI (Weak)	22473208
MIRT440120	hsa-miR-218-5p	Homo sapiens	NFATC3	4775	Homo sapiens	HITS-CLIP	Functional MTI (Weak)	23212916
MIRT440532	hsa-miR-409-5p	Homo sapiens	GSK3B	2932	Homo sapiens	HITS-CLIP	Functional MTI (Weak)	24374217
MIRT441025	hsa-miR-493-3p	Homo sapiens	CALM1	801	Homo sapiens	HITS-CLIP	Functional MTI (Weak)	24374217
MIRT441026	hsa-miR-142-3p	Homo sapiens	CALM1	801	Homo sapiens	HITS-CLIP	Functional MTI (Weak)	22473208
MIRT442615	hsa-miR-9-3p	Homo sapiens	PPP3R1	5534	Homo sapiens	PAR-CLIP	Functional MTI (Weak)	22100165
MIRT442616	hsa-miR-4714-3p	Homo sapiens	PPP3R1	5534	Homo sapiens	PAR-CLIP	Functional MTI (Weak)	22100165
MIRT442617	hsa-miR-656-3p	Homo sapiens	PPP3R1	5534	Homo sapiens	PAR-CLIP	Functional MTI (Weak)	22100165
MIRT445805	hsa-miR-526b-5p	Homo sapiens	NFATC2	4773	Homo sapiens	PAR-CLIP	Functional MTI (Weak)	22100165
MIRT445806	hsa-miR-7157-5p	Homo sapiens	NFATC2	4773	Homo sapiens	PAR-CLIP	Functional MTI (Weak)	22100165
MIRT445807	hsa-miR-4310	Homo sapiens	NFATC2	4773	Homo sapiens	PAR-CLIP	Functional MTI (Weak)	22100165
MIRT445808	hsa-miR-451b	Homo sapiens	NFATC2	4773	Homo sapiens	PAR-CLIP	Functional MTI (Weak)	22100165
MIRT445809	hsa-miR-5571-5p	Homo sapiens	NFATC2	4773	Homo sapiens	PAR-CLIP	Functional MTI (Weak)	22100165
MIRT445925	hsa-miR-4635	Homo sapiens	MAP3K7	6885	Homo sapiens	PAR-CLIP	Functional MTI (Weak)	22100165
MIRT445926	hsa-miR-4709-3p	Homo sapiens	MAP3K7	6885	Homo sapiens	PAR-CLIP	Functional MTI (Weak)	22100165
MIRT449701	hsa-miR-3914	Homo sapiens	MAP3K7	6885	Homo sapiens	PAR-CLIP	Functional MTI (Weak)	22100165
MIRT454405	hsa-miR-3650	Homo sapiens	AKAP5	9495	Homo sapiens	PAR-CLIP	Functional MTI (Weak)	23592263
MIRT454406	hsa-miR-298	Homo sapiens	AKAP5	9495	Homo sapiens	PAR-CLIP	Functional MTI (Weak)	23592263
MIRT454407	hsa-miR-1827	Homo sapiens	AKAP5	9495	Homo sapiens	PAR-CLIP	Functional MTI (Weak)	23592263
MIRT454408	hsa-miR-4790-3p	Homo sapiens	AKAP5	9495	Homo sapiens	PAR-CLIP	Functional MTI (Weak)	23592263
MIRT454409	hsa-miR-4649-3p	Homo sapiens	AKAP5	9495	Homo sapiens	PAR-CLIP	Functional MTI (Weak)	23592263
MIRT454410	hsa-miR-6511a-5p	Homo sapiens	AKAP5	9495	Homo sapiens	PAR-CLIP	Functional MTI (Weak)	23592263
MIRT454411	hsa-miR-1910-3p	Homo sapiens	AKAP5	9495	Homo sapiens	PAR-CLIP	Functional MTI (Weak)	23592263
MIRT475080	hsa-miR-3163	Homo sapiens	ITPR1	3708	Homo sapiens	PAR-CLIP	Functional MTI (Weak)	20371350
MIRT475080	hsa-miR-3163	Homo sapiens	ITPR1	3708	Homo sapiens	PAR-CLIP	Functional MTI (Weak)	21572407
MIRT475080	hsa-miR-3163	Homo sapiens	ITPR1	3708	Homo sapiens	PAR-CLIP	Functional MTI (Weak)	23592263
MIRT478712	hsa-miR-4671-3p	Homo sapiens	CSNK1A1	1452	Homo sapiens	PAR-CLIP	Functional MTI (Weak)	20371350
MIRT478712	hsa-miR-4671-3p	Homo sapiens	CSNK1A1	1452	Homo sapiens	PAR-CLIP	Functional MTI (Weak)	23446348
MIRT478712	hsa-miR-4671-3p	Homo sapiens	CSNK1A1	1452	Homo sapiens	PAR-CLIP	Functional MTI (Weak)	23592263
MIRT478713	hsa-miR-519c-3p	Homo sapiens	CSNK1A1	1452	Homo sapiens	PAR-CLIP	Functional MTI (Weak)	20371350
MIRT478713	hsa-miR-519c-3p	Homo sapiens	CSNK1A1	1452	Homo sapiens	PAR-CLIP	Functional MTI (Weak)	23446348
MIRT478713	hsa-miR-519c-3p	Homo sapiens	CSNK1A1	1452	Homo sapiens	PAR-CLIP	Functional MTI (Weak)	23592263
MIRT478714	hsa-miR-519b-3p	Homo sapiens	CSNK1A1	1452	Homo sapiens	PAR-CLIP	Functional MTI (Weak)	20371350
MIRT478714	hsa-miR-519b-3p	Homo sapiens	CSNK1A1	1452	Homo sapiens	PAR-CLIP	Functional MTI (Weak)	23446348
MIRT478714	hsa-miR-519b-3p	Homo sapiens	CSNK1A1	1452	Homo sapiens	PAR-CLIP	Functional MTI (Weak)	23592263
MIRT478715	hsa-miR-519a-3p	Homo sapiens	CSNK1A1	1452	Homo sapiens	PAR-CLIP	Functional MTI (Weak)	20371350
MIRT478715	hsa-miR-519a-3p	Homo sapiens	CSNK1A1	1452	Homo sapiens	PAR-CLIP	Functional MTI (Weak)	23446348
MIRT478715	hsa-miR-519a-3p	Homo sapiens	CSNK1A1	1452	Homo sapiens	PAR-CLIP	Functional MTI (Weak)	23592263
MIRT478716	hsa-miR-5692a	Homo sapiens	CSNK1A1	1452	Homo sapiens	PAR-CLIP	Functional MTI (Weak)	20371350
MIRT478716	hsa-miR-5692a	Homo sapiens	CSNK1A1	1452	Homo sapiens	PAR-CLIP	Functional MTI (Weak)	23592263
MIRT478717	hsa-miR-548t-5p	Homo sapiens	CSNK1A1	1452	Homo sapiens	PAR-CLIP	Functional MTI (Weak)	23592263
MIRT478718	hsa-miR-548az-5p	Homo sapiens	CSNK1A1	1452	Homo sapiens	PAR-CLIP	Functional MTI (Weak)	23592263
MIRT478719	hsa-miR-106b-5p	Homo sapiens	CSNK1A1	1452	Homo sapiens	PAR-CLIP	Functional MTI (Weak)	20371350
MIRT478719	hsa-miR-106b-5p	Homo sapiens	CSNK1A1	1452	Homo sapiens	PAR-CLIP	Functional MTI (Weak)	23592263
MIRT478720	hsa-miR-17-5p	Homo sapiens	CSNK1A1	1452	Homo sapiens	PAR-CLIP	Functional MTI (Weak)	20371350
MIRT478720	hsa-miR-17-5p	Homo sapiens	CSNK1A1	1452	Homo sapiens	PAR-CLIP	Functional MTI (Weak)	23592263
MIRT478721	hsa-miR-106a-5p	Homo sapiens	CSNK1A1	1452	Homo sapiens	PAR-CLIP	Functional MTI (Weak)	20371350
MIRT478721	hsa-miR-106a-5p	Homo sapiens	CSNK1A1	1452	Homo sapiens	PAR-CLIP	Functional MTI (Weak)	23592263
MIRT478722	hsa-miR-20a-5p	Homo sapiens	CSNK1A1	1452	Homo sapiens	PAR-CLIP	Functional MTI (Weak)	20371350
MIRT478722	hsa-miR-20a-5p	Homo sapiens	CSNK1A1	1452	Homo sapiens	PAR-CLIP	Functional MTI (Weak)	23592263
MIRT478723	hsa-miR-20b-5p	Homo sapiens	CSNK1A1	1452	Homo sapiens	PAR-CLIP	Functional MTI (Weak)	20371350
MIRT478723	hsa-miR-20b-5p	Homo sapiens	CSNK1A1	1452	Homo sapiens	PAR-CLIP	Functional MTI (Weak)	23592263
MIRT478724	hsa-miR-519d-3p	Homo sapiens	CSNK1A1	1452	Homo sapiens	PAR-CLIP	Functional MTI (Weak)	20371350
MIRT478724	hsa-miR-519d-3p	Homo sapiens	CSNK1A1	1452	Homo sapiens	PAR-CLIP	Functional MTI (Weak)	23592263
MIRT478725	hsa-miR-526b-3p	Homo sapiens	CSNK1A1	1452	Homo sapiens	PAR-CLIP	Functional MTI (Weak)	20371350
MIRT478725	hsa-miR-526b-3p	Homo sapiens	CSNK1A1	1452	Homo sapiens	PAR-CLIP	Functional MTI (Weak)	23592263
MIRT478726	hsa-miR-93-5p	Homo sapiens	CSNK1A1	1452	Homo sapiens	PAR-CLIP	Functional MTI (Weak)	20371350
MIRT478726	hsa-miR-93-5p	Homo sapiens	CSNK1A1	1452	Homo sapiens	PAR-CLIP	Functional MTI (Weak)	23592263
MIRT478727	hsa-miR-520c-3p	Homo sapiens	CSNK1A1	1452	Homo sapiens	PAR-CLIP	Functional MTI (Weak)	20371350
MIRT478727	hsa-miR-520c-3p	Homo sapiens	CSNK1A1	1452	Homo sapiens	PAR-CLIP	Functional MTI (Weak)	23446348
MIRT478727	hsa-miR-520c-3p	Homo sapiens	CSNK1A1	1452	Homo sapiens	PAR-CLIP	Functional MTI (Weak)	23592263
MIRT478728	hsa-miR-302a-3p	Homo sapiens	CSNK1A1	1452	Homo sapiens	PAR-CLIP	Functional MTI (Weak)	20371350
MIRT478728	hsa-miR-302a-3p	Homo sapiens	CSNK1A1	1452	Homo sapiens	PAR-CLIP	Functional MTI (Weak)	23446348
MIRT478728	hsa-miR-302a-3p	Homo sapiens	CSNK1A1	1452	Homo sapiens	PAR-CLIP	Functional MTI (Weak)	23592263
MIRT478729	hsa-miR-302b-3p	Homo sapiens	CSNK1A1	1452	Homo sapiens	PAR-CLIP	Functional MTI (Weak)	20371350
MIRT478729	hsa-miR-302b-3p	Homo sapiens	CSNK1A1	1452	Homo sapiens	PAR-CLIP	Functional MTI (Weak)	23446348
MIRT478729	hsa-miR-302b-3p	Homo sapiens	CSNK1A1	1452	Homo sapiens	PAR-CLIP	Functional MTI (Weak)	23592263
MIRT478730	hsa-miR-302c-3p	Homo sapiens	CSNK1A1	1452	Homo sapiens	PAR-CLIP	Functional MTI (Weak)	20371350
MIRT478730	hsa-miR-302c-3p	Homo sapiens	CSNK1A1	1452	Homo sapiens	PAR-CLIP	Functional MTI (Weak)	23446348
MIRT478730	hsa-miR-302c-3p	Homo sapiens	CSNK1A1	1452	Homo sapiens	PAR-CLIP	Functional MTI (Weak)	23592263
MIRT478731	hsa-miR-302d-3p	Homo sapiens	CSNK1A1	1452	Homo sapiens	PAR-CLIP	Functional MTI (Weak)	20371350
MIRT478731	hsa-miR-302d-3p	Homo sapiens	CSNK1A1	1452	Homo sapiens	PAR-CLIP	Functional MTI (Weak)	23446348
MIRT478731	hsa-miR-302d-3p	Homo sapiens	CSNK1A1	1452	Homo sapiens	PAR-CLIP	Functional MTI (Weak)	23592263
MIRT478732	hsa-miR-520e	Homo sapiens	CSNK1A1	1452	Homo sapiens	PAR-CLIP	Functional MTI (Weak)	20371350
MIRT478732	hsa-miR-520e	Homo sapiens	CSNK1A1	1452	Homo sapiens	PAR-CLIP	Functional MTI (Weak)	23446348
MIRT478732	hsa-miR-520e	Homo sapiens	CSNK1A1	1452	Homo sapiens	PAR-CLIP	Functional MTI (Weak)	23592263
MIRT478733	hsa-miR-520d-3p	Homo sapiens	CSNK1A1	1452	Homo sapiens	PAR-CLIP	Functional MTI (Weak)	20371350
MIRT478733	hsa-miR-520d-3p	Homo sapiens	CSNK1A1	1452	Homo sapiens	PAR-CLIP	Functional MTI (Weak)	23446348
MIRT478733	hsa-miR-520d-3p	Homo sapiens	CSNK1A1	1452	Homo sapiens	PAR-CLIP	Functional MTI (Weak)	23592263
MIRT478734	hsa-miR-372-3p	Homo sapiens	CSNK1A1	1452	Homo sapiens	PAR-CLIP	Functional MTI (Weak)	20371350
MIRT478734	hsa-miR-372-3p	Homo sapiens	CSNK1A1	1452	Homo sapiens	PAR-CLIP	Functional MTI (Weak)	23446348
MIRT478734	hsa-miR-372-3p	Homo sapiens	CSNK1A1	1452	Homo sapiens	PAR-CLIP	Functional MTI (Weak)	23592263
MIRT478735	hsa-miR-373-3p	Homo sapiens	CSNK1A1	1452	Homo sapiens	PAR-CLIP	Functional MTI (Weak)	20371350
MIRT478735	hsa-miR-373-3p	Homo sapiens	CSNK1A1	1452	Homo sapiens	PAR-CLIP	Functional MTI (Weak)	23446348
MIRT478735	hsa-miR-373-3p	Homo sapiens	CSNK1A1	1452	Homo sapiens	PAR-CLIP	Functional MTI (Weak)	23592263
MIRT478736	hsa-miR-520b	Homo sapiens	CSNK1A1	1452	Homo sapiens	PAR-CLIP	Functional MTI (Weak)	20371350
MIRT478736	hsa-miR-520b	Homo sapiens	CSNK1A1	1452	Homo sapiens	PAR-CLIP	Functional MTI (Weak)	23446348
MIRT478736	hsa-miR-520b	Homo sapiens	CSNK1A1	1452	Homo sapiens	PAR-CLIP	Functional MTI (Weak)	23592263
MIRT478737	hsa-miR-302e	Homo sapiens	CSNK1A1	1452	Homo sapiens	PAR-CLIP	Functional MTI (Weak)	20371350
MIRT478737	hsa-miR-302e	Homo sapiens	CSNK1A1	1452	Homo sapiens	PAR-CLIP	Functional MTI (Weak)	23446348
MIRT478737	hsa-miR-302e	Homo sapiens	CSNK1A1	1452	Homo sapiens	PAR-CLIP	Functional MTI (Weak)	23592263
MIRT478738	hsa-miR-520a-3p	Homo sapiens	CSNK1A1	1452	Homo sapiens	PAR-CLIP	Functional MTI (Weak)	20371350
MIRT478738	hsa-miR-520a-3p	Homo sapiens	CSNK1A1	1452	Homo sapiens	PAR-CLIP	Functional MTI (Weak)	23446348
MIRT478738	hsa-miR-520a-3p	Homo sapiens	CSNK1A1	1452	Homo sapiens	PAR-CLIP	Functional MTI (Weak)	23592263
MIRT478739	hsa-miR-153-3p	Homo sapiens	CSNK1A1	1452	Homo sapiens	PAR-CLIP	Functional MTI (Weak)	20371350
MIRT478739	hsa-miR-153-3p	Homo sapiens	CSNK1A1	1452	Homo sapiens	PAR-CLIP	Functional MTI (Weak)	23446348
MIRT478739	hsa-miR-153-3p	Homo sapiens	CSNK1A1	1452	Homo sapiens	PAR-CLIP	Functional MTI (Weak)	23592263
MIRT504732	hsa-miR-1277-5p	Homo sapiens	GSK3B	2932	Homo sapiens	PAR-CLIP	Functional MTI (Weak)	21572407
MIRT504732	hsa-miR-1277-5p	Homo sapiens	GSK3B	2932	Homo sapiens	PAR-CLIP	Functional MTI (Weak)	22012620
MIRT504732	hsa-miR-1277-5p	Homo sapiens	GSK3B	2932	Homo sapiens	HITS-CLIP	Functional MTI (Weak)	23313552
MIRT504732	hsa-miR-1277-5p	Homo sapiens	GSK3B	2932	Homo sapiens	PAR-CLIP	Functional MTI (Weak)	23446348
MIRT504733	hsa-miR-374b-5p	Homo sapiens	GSK3B	2932	Homo sapiens	PAR-CLIP	Functional MTI (Weak)	21572407
MIRT504733	hsa-miR-374b-5p	Homo sapiens	GSK3B	2932	Homo sapiens	PAR-CLIP	Functional MTI (Weak)	22012620
MIRT504733	hsa-miR-374b-5p	Homo sapiens	GSK3B	2932	Homo sapiens	HITS-CLIP	Functional MTI (Weak)	23313552
MIRT504733	hsa-miR-374b-5p	Homo sapiens	GSK3B	2932	Homo sapiens	PAR-CLIP	Functional MTI (Weak)	23446348
MIRT504734	hsa-miR-374a-5p	Homo sapiens	GSK3B	2932	Homo sapiens	PAR-CLIP	Functional MTI (Weak)	21572407
MIRT504734	hsa-miR-374a-5p	Homo sapiens	GSK3B	2932	Homo sapiens	PAR-CLIP	Functional MTI (Weak)	22012620
MIRT504734	hsa-miR-374a-5p	Homo sapiens	GSK3B	2932	Homo sapiens	HITS-CLIP	Functional MTI (Weak)	23313552
MIRT504734	hsa-miR-374a-5p	Homo sapiens	GSK3B	2932	Homo sapiens	PAR-CLIP	Functional MTI (Weak)	23446348
MIRT504735	hsa-miR-410-3p	Homo sapiens	GSK3B	2932	Homo sapiens	PAR-CLIP	Functional MTI (Weak)	21572407
MIRT504735	hsa-miR-410-3p	Homo sapiens	GSK3B	2932	Homo sapiens	PAR-CLIP	Functional MTI (Weak)	22012620
MIRT504735	hsa-miR-410-3p	Homo sapiens	GSK3B	2932	Homo sapiens	HITS-CLIP	Functional MTI (Weak)	23313552
MIRT504735	hsa-miR-410-3p	Homo sapiens	GSK3B	2932	Homo sapiens	PAR-CLIP	Functional MTI (Weak)	23446348
MIRT504736	hsa-miR-5692c	Homo sapiens	GSK3B	2932	Homo sapiens	PAR-CLIP	Functional MTI (Weak)	21572407
MIRT504736	hsa-miR-5692c	Homo sapiens	GSK3B	2932	Homo sapiens	PAR-CLIP	Functional MTI (Weak)	22012620
MIRT504736	hsa-miR-5692c	Homo sapiens	GSK3B	2932	Homo sapiens	HITS-CLIP	Functional MTI (Weak)	23313552
MIRT504736	hsa-miR-5692c	Homo sapiens	GSK3B	2932	Homo sapiens	PAR-CLIP	Functional MTI (Weak)	23446348
MIRT504737	hsa-miR-5692b	Homo sapiens	GSK3B	2932	Homo sapiens	PAR-CLIP	Functional MTI (Weak)	21572407
MIRT504737	hsa-miR-5692b	Homo sapiens	GSK3B	2932	Homo sapiens	PAR-CLIP	Functional MTI (Weak)	22012620
MIRT504737	hsa-miR-5692b	Homo sapiens	GSK3B	2932	Homo sapiens	HITS-CLIP	Functional MTI (Weak)	23313552
MIRT504737	hsa-miR-5692b	Homo sapiens	GSK3B	2932	Homo sapiens	PAR-CLIP	Functional MTI (Weak)	23446348
MIRT504738	hsa-miR-513c-3p	Homo sapiens	GSK3B	2932	Homo sapiens	PAR-CLIP	Functional MTI (Weak)	21572407
MIRT504738	hsa-miR-513c-3p	Homo sapiens	GSK3B	2932	Homo sapiens	PAR-CLIP	Functional MTI (Weak)	22012620
MIRT504738	hsa-miR-513c-3p	Homo sapiens	GSK3B	2932	Homo sapiens	HITS-CLIP	Functional MTI (Weak)	23313552
MIRT504738	hsa-miR-513c-3p	Homo sapiens	GSK3B	2932	Homo sapiens	PAR-CLIP	Functional MTI (Weak)	23446348
MIRT504739	hsa-miR-369-3p	Homo sapiens	GSK3B	2932	Homo sapiens	PAR-CLIP	Functional MTI (Weak)	21572407
MIRT504739	hsa-miR-369-3p	Homo sapiens	GSK3B	2932	Homo sapiens	PAR-CLIP	Functional MTI (Weak)	22012620
MIRT504739	hsa-miR-369-3p	Homo sapiens	GSK3B	2932	Homo sapiens	HITS-CLIP	Functional MTI (Weak)	23313552
MIRT504739	hsa-miR-369-3p	Homo sapiens	GSK3B	2932	Homo sapiens	PAR-CLIP	Functional MTI (Weak)	23446348
MIRT504740	hsa-miR-513a-3p	Homo sapiens	GSK3B	2932	Homo sapiens	PAR-CLIP	Functional MTI (Weak)	21572407
MIRT504740	hsa-miR-513a-3p	Homo sapiens	GSK3B	2932	Homo sapiens	PAR-CLIP	Functional MTI (Weak)	22012620
MIRT504740	hsa-miR-513a-3p	Homo sapiens	GSK3B	2932	Homo sapiens	HITS-CLIP	Functional MTI (Weak)	23313552
MIRT504740	hsa-miR-513a-3p	Homo sapiens	GSK3B	2932	Homo sapiens	PAR-CLIP	Functional MTI (Weak)	23446348
MIRT504741	hsa-miR-3606-3p	Homo sapiens	GSK3B	2932	Homo sapiens	PAR-CLIP	Functional MTI (Weak)	21572407
MIRT504741	hsa-miR-3606-3p	Homo sapiens	GSK3B	2932	Homo sapiens	PAR-CLIP	Functional MTI (Weak)	22012620
MIRT504741	hsa-miR-3606-3p	Homo sapiens	GSK3B	2932	Homo sapiens	HITS-CLIP	Functional MTI (Weak)	23313552
MIRT504741	hsa-miR-3606-3p	Homo sapiens	GSK3B	2932	Homo sapiens	PAR-CLIP	Functional MTI (Weak)	23446348
MIRT507502	hsa-miR-6844	Homo sapiens	DYRK1A	1859	Homo sapiens	PAR-CLIP	Functional MTI (Weak)	20371350
MIRT507502	hsa-miR-6844	Homo sapiens	DYRK1A	1859	Homo sapiens	PAR-CLIP	Functional MTI (Weak)	21572407
MIRT507502	hsa-miR-6844	Homo sapiens	DYRK1A	1859	Homo sapiens	PAR-CLIP	Functional MTI (Weak)	23446348
MIRT507503	hsa-miR-3944-5p	Homo sapiens	DYRK1A	1859	Homo sapiens	PAR-CLIP	Functional MTI (Weak)	20371350
MIRT507503	hsa-miR-3944-5p	Homo sapiens	DYRK1A	1859	Homo sapiens	PAR-CLIP	Functional MTI (Weak)	21572407
MIRT507503	hsa-miR-3944-5p	Homo sapiens	DYRK1A	1859	Homo sapiens	PAR-CLIP	Functional MTI (Weak)	23446348
MIRT507504	hsa-miR-143-5p	Homo sapiens	DYRK1A	1859	Homo sapiens	PAR-CLIP	Functional MTI (Weak)	20371350
MIRT507504	hsa-miR-143-5p	Homo sapiens	DYRK1A	1859	Homo sapiens	PAR-CLIP	Functional MTI (Weak)	21572407
MIRT507504	hsa-miR-143-5p	Homo sapiens	DYRK1A	1859	Homo sapiens	PAR-CLIP	Functional MTI (Weak)	23446348
MIRT507505	hsa-miR-3165	Homo sapiens	DYRK1A	1859	Homo sapiens	PAR-CLIP	Functional MTI (Weak)	20371350
MIRT507505	hsa-miR-3165	Homo sapiens	DYRK1A	1859	Homo sapiens	PAR-CLIP	Functional MTI (Weak)	21572407
MIRT507505	hsa-miR-3165	Homo sapiens	DYRK1A	1859	Homo sapiens	PAR-CLIP	Functional MTI (Weak)	23446348
MIRT507506	hsa-miR-8071	Homo sapiens	DYRK1A	1859	Homo sapiens	PAR-CLIP	Functional MTI (Weak)	20371350
MIRT507506	hsa-miR-8071	Homo sapiens	DYRK1A	1859	Homo sapiens	PAR-CLIP	Functional MTI (Weak)	21572407
MIRT507506	hsa-miR-8071	Homo sapiens	DYRK1A	1859	Homo sapiens	PAR-CLIP	Functional MTI (Weak)	23446348
MIRT507507	hsa-miR-4683	Homo sapiens	DYRK1A	1859	Homo sapiens	PAR-CLIP	Functional MTI (Weak)	20371350
MIRT507507	hsa-miR-4683	Homo sapiens	DYRK1A	1859	Homo sapiens	PAR-CLIP	Functional MTI (Weak)	21572407
MIRT507507	hsa-miR-4683	Homo sapiens	DYRK1A	1859	Homo sapiens	PAR-CLIP	Functional MTI (Weak)	23446348
MIRT507912	hsa-miR-6867-5p	Homo sapiens	CALM1	801	Homo sapiens	PAR-CLIP	Functional MTI (Weak)	20371350
MIRT507912	hsa-miR-6867-5p	Homo sapiens	CALM1	801	Homo sapiens	PAR-CLIP	Functional MTI (Weak)	23446348
MIRT507913	hsa-miR-382-5p	Homo sapiens	CALM1	801	Homo sapiens	PAR-CLIP	Functional MTI (Weak)	20371350
MIRT507913	hsa-miR-382-5p	Homo sapiens	CALM1	801	Homo sapiens	PAR-CLIP	Functional MTI (Weak)	23446348
MIRT510950	hsa-miR-6763-3p	Homo sapiens	PPP3R1	5534	Homo sapiens	PAR-CLIP	Functional MTI (Weak)	20371350
MIRT510950	hsa-miR-6763-3p	Homo sapiens	PPP3R1	5534	Homo sapiens	PAR-CLIP	Functional MTI (Weak)	23446348
MIRT510951	hsa-miR-6758-3p	Homo sapiens	PPP3R1	5534	Homo sapiens	PAR-CLIP	Functional MTI (Weak)	20371350
MIRT510951	hsa-miR-6758-3p	Homo sapiens	PPP3R1	5534	Homo sapiens	PAR-CLIP	Functional MTI (Weak)	23446348
MIRT510952	hsa-miR-5587-3p	Homo sapiens	PPP3R1	5534	Homo sapiens	PAR-CLIP	Functional MTI (Weak)	20371350
MIRT510952	hsa-miR-5587-3p	Homo sapiens	PPP3R1	5534	Homo sapiens	PAR-CLIP	Functional MTI (Weak)	23446348
MIRT510953	hsa-miR-4707-5p	Homo sapiens	PPP3R1	5534	Homo sapiens	PAR-CLIP	Functional MTI (Weak)	20371350
MIRT510953	hsa-miR-4707-5p	Homo sapiens	PPP3R1	5534	Homo sapiens	PAR-CLIP	Functional MTI (Weak)	23446348
MIRT510954	hsa-miR-4704-5p	Homo sapiens	PPP3R1	5534	Homo sapiens	PAR-CLIP	Functional MTI (Weak)	20371350
MIRT510954	hsa-miR-4704-5p	Homo sapiens	PPP3R1	5534	Homo sapiens	PAR-CLIP	Functional MTI (Weak)	23446348
MIRT512183	hsa-miR-3680-3p	Homo sapiens	CALM1	801	Homo sapiens	PAR-CLIP	Functional MTI (Weak)	20371350
MIRT512183	hsa-miR-3680-3p	Homo sapiens	CALM1	801	Homo sapiens	PAR-CLIP	Functional MTI (Weak)	21572407
MIRT512183	hsa-miR-3680-3p	Homo sapiens	CALM1	801	Homo sapiens	PAR-CLIP	Functional MTI (Weak)	23446348
MIRT512184	hsa-miR-557	Homo sapiens	CALM1	801	Homo sapiens	PAR-CLIP	Functional MTI (Weak)	20371350
MIRT512184	hsa-miR-557	Homo sapiens	CALM1	801	Homo sapiens	PAR-CLIP	Functional MTI (Weak)	21572407
MIRT512184	hsa-miR-557	Homo sapiens	CALM1	801	Homo sapiens	PAR-CLIP	Functional MTI (Weak)	23446348
MIRT512185	hsa-miR-507	Homo sapiens	CALM1	801	Homo sapiens	PAR-CLIP	Functional MTI (Weak)	20371350
MIRT512185	hsa-miR-507	Homo sapiens	CALM1	801	Homo sapiens	PAR-CLIP	Functional MTI (Weak)	21572407
MIRT512185	hsa-miR-507	Homo sapiens	CALM1	801	Homo sapiens	PAR-CLIP	Functional MTI (Weak)	23446348
MIRT512186	hsa-miR-4696	Homo sapiens	CALM1	801	Homo sapiens	PAR-CLIP	Functional MTI (Weak)	20371350
MIRT512186	hsa-miR-4696	Homo sapiens	CALM1	801	Homo sapiens	PAR-CLIP	Functional MTI (Weak)	21572407
MIRT512186	hsa-miR-4696	Homo sapiens	CALM1	801	Homo sapiens	PAR-CLIP	Functional MTI (Weak)	23446348
MIRT512935	hsa-miR-548au-3p	Homo sapiens	MAP3K7	6885	Homo sapiens	PAR-CLIP	Functional MTI (Weak)	20371350
MIRT512935	hsa-miR-548au-3p	Homo sapiens	MAP3K7	6885	Homo sapiens	PAR-CLIP	Functional MTI (Weak)	23446348
MIRT512936	hsa-miR-107	Homo sapiens	MAP3K7	6885	Homo sapiens	PAR-CLIP	Functional MTI (Weak)	20371350
MIRT512936	hsa-miR-107	Homo sapiens	MAP3K7	6885	Homo sapiens	PAR-CLIP	Functional MTI (Weak)	23446348
MIRT512937	hsa-miR-545-3p	Homo sapiens	MAP3K7	6885	Homo sapiens	PAR-CLIP	Functional MTI (Weak)	20371350
MIRT512937	hsa-miR-545-3p	Homo sapiens	MAP3K7	6885	Homo sapiens	PAR-CLIP	Functional MTI (Weak)	23446348
MIRT512938	hsa-miR-1295b-3p	Homo sapiens	MAP3K7	6885	Homo sapiens	PAR-CLIP	Functional MTI (Weak)	20371350
MIRT512938	hsa-miR-1295b-3p	Homo sapiens	MAP3K7	6885	Homo sapiens	PAR-CLIP	Functional MTI (Weak)	23446348
MIRT512939	hsa-miR-449c-5p	Homo sapiens	MAP3K7	6885	Homo sapiens	PAR-CLIP	Functional MTI (Weak)	20371350
MIRT512939	hsa-miR-449c-5p	Homo sapiens	MAP3K7	6885	Homo sapiens	PAR-CLIP	Functional MTI (Weak)	23446348
MIRT512940	hsa-miR-34b-5p	Homo sapiens	MAP3K7	6885	Homo sapiens	PAR-CLIP	Functional MTI (Weak)	20371350
MIRT512940	hsa-miR-34b-5p	Homo sapiens	MAP3K7	6885	Homo sapiens	PAR-CLIP	Functional MTI (Weak)	23446348
MIRT512941	hsa-miR-2682-5p	Homo sapiens	MAP3K7	6885	Homo sapiens	PAR-CLIP	Functional MTI (Weak)	20371350
MIRT512941	hsa-miR-2682-5p	Homo sapiens	MAP3K7	6885	Homo sapiens	PAR-CLIP	Functional MTI (Weak)	23446348
MIRT512942	hsa-miR-940	Homo sapiens	MAP3K7	6885	Homo sapiens	PAR-CLIP	Functional MTI (Weak)	20371350
MIRT512942	hsa-miR-940	Homo sapiens	MAP3K7	6885	Homo sapiens	PAR-CLIP	Functional MTI (Weak)	23446348
MIRT512943	hsa-miR-6893-5p	Homo sapiens	MAP3K7	6885	Homo sapiens	PAR-CLIP	Functional MTI (Weak)	20371350
MIRT512943	hsa-miR-6893-5p	Homo sapiens	MAP3K7	6885	Homo sapiens	PAR-CLIP	Functional MTI (Weak)	23446348
MIRT512944	hsa-miR-6808-5p	Homo sapiens	MAP3K7	6885	Homo sapiens	PAR-CLIP	Functional MTI (Weak)	20371350
MIRT512944	hsa-miR-6808-5p	Homo sapiens	MAP3K7	6885	Homo sapiens	PAR-CLIP	Functional MTI (Weak)	23446348
MIRT512945	hsa-miR-6511a-5p	Homo sapiens	MAP3K7	6885	Homo sapiens	PAR-CLIP	Functional MTI (Weak)	20371350
MIRT512945	hsa-miR-6511a-5p	Homo sapiens	MAP3K7	6885	Homo sapiens	PAR-CLIP	Functional MTI (Weak)	23446348
MIRT512946	hsa-miR-1910-3p	Homo sapiens	MAP3K7	6885	Homo sapiens	PAR-CLIP	Functional MTI (Weak)	20371350
MIRT512946	hsa-miR-1910-3p	Homo sapiens	MAP3K7	6885	Homo sapiens	PAR-CLIP	Functional MTI (Weak)	23446348
MIRT521719	hsa-miR-651-3p	Homo sapiens	PPP3R1	5534	Homo sapiens	PAR-CLIP	Functional MTI (Weak)	20371350
MIRT521719	hsa-miR-651-3p	Homo sapiens	PPP3R1	5534	Homo sapiens	PAR-CLIP	Functional MTI (Weak)	23446348
MIRT521720	hsa-miR-548as-3p	Homo sapiens	PPP3R1	5534	Homo sapiens	PAR-CLIP	Functional MTI (Weak)	20371350
MIRT521720	hsa-miR-548as-3p	Homo sapiens	PPP3R1	5534	Homo sapiens	PAR-CLIP	Functional MTI (Weak)	23446348
MIRT521721	hsa-miR-548z	Homo sapiens	PPP3R1	5534	Homo sapiens	PAR-CLIP	Functional MTI (Weak)	20371350
MIRT521721	hsa-miR-548z	Homo sapiens	PPP3R1	5534	Homo sapiens	PAR-CLIP	Functional MTI (Weak)	23446348
MIRT521722	hsa-miR-548h-3p	Homo sapiens	PPP3R1	5534	Homo sapiens	PAR-CLIP	Functional MTI (Weak)	20371350
MIRT521722	hsa-miR-548h-3p	Homo sapiens	PPP3R1	5534	Homo sapiens	PAR-CLIP	Functional MTI (Weak)	23446348
MIRT521723	hsa-miR-548d-3p	Homo sapiens	PPP3R1	5534	Homo sapiens	PAR-CLIP	Functional MTI (Weak)	20371350
MIRT521723	hsa-miR-548d-3p	Homo sapiens	PPP3R1	5534	Homo sapiens	PAR-CLIP	Functional MTI (Weak)	23446348
MIRT521724	hsa-miR-548bb-3p	Homo sapiens	PPP3R1	5534	Homo sapiens	PAR-CLIP	Functional MTI (Weak)	20371350
MIRT521724	hsa-miR-548bb-3p	Homo sapiens	PPP3R1	5534	Homo sapiens	PAR-CLIP	Functional MTI (Weak)	23446348
MIRT521725	hsa-miR-548ac	Homo sapiens	PPP3R1	5534	Homo sapiens	PAR-CLIP	Functional MTI (Weak)	20371350
MIRT521725	hsa-miR-548ac	Homo sapiens	PPP3R1	5534	Homo sapiens	PAR-CLIP	Functional MTI (Weak)	23446348
MIRT523376	hsa-miR-6083	Homo sapiens	GSK3B	2932	Homo sapiens	PAR-CLIP	Functional MTI (Weak)	21572407
MIRT523376	hsa-miR-6083	Homo sapiens	GSK3B	2932	Homo sapiens	HITS-CLIP	Functional MTI (Weak)	23313552
MIRT523376	hsa-miR-6083	Homo sapiens	GSK3B	2932	Homo sapiens	PAR-CLIP	Functional MTI (Weak)	23446348
MIRT524572	hsa-miR-3163	Homo sapiens	CALM1	801	Homo sapiens	PAR-CLIP	Functional MTI (Weak)	20371350
MIRT524572	hsa-miR-3163	Homo sapiens	CALM1	801	Homo sapiens	PAR-CLIP	Functional MTI (Weak)	21572407
MIRT524572	hsa-miR-3163	Homo sapiens	CALM1	801	Homo sapiens	PAR-CLIP	Functional MTI (Weak)	23446348
MIRT524573	hsa-miR-583	Homo sapiens	CALM1	801	Homo sapiens	PAR-CLIP	Functional MTI (Weak)	20371350
MIRT524573	hsa-miR-583	Homo sapiens	CALM1	801	Homo sapiens	PAR-CLIP	Functional MTI (Weak)	21572407
MIRT524573	hsa-miR-583	Homo sapiens	CALM1	801	Homo sapiens	PAR-CLIP	Functional MTI (Weak)	23446348
MIRT524574	hsa-miR-1276	Homo sapiens	CALM1	801	Homo sapiens	PAR-CLIP	Functional MTI (Weak)	20371350
MIRT524574	hsa-miR-1276	Homo sapiens	CALM1	801	Homo sapiens	PAR-CLIP	Functional MTI (Weak)	21572407
MIRT524574	hsa-miR-1276	Homo sapiens	CALM1	801	Homo sapiens	PAR-CLIP	Functional MTI (Weak)	23446348
MIRT524575	hsa-miR-142-5p	Homo sapiens	CALM1	801	Homo sapiens	PAR-CLIP	Functional MTI (Weak)	20371350
MIRT524575	hsa-miR-142-5p	Homo sapiens	CALM1	801	Homo sapiens	PAR-CLIP	Functional MTI (Weak)	21572407
MIRT524575	hsa-miR-142-5p	Homo sapiens	CALM1	801	Homo sapiens	PAR-CLIP	Functional MTI (Weak)	23446348
MIRT524576	hsa-miR-5590-3p	Homo sapiens	CALM1	801	Homo sapiens	PAR-CLIP	Functional MTI (Weak)	20371350
MIRT524576	hsa-miR-5590-3p	Homo sapiens	CALM1	801	Homo sapiens	PAR-CLIP	Functional MTI (Weak)	21572407
MIRT524576	hsa-miR-5590-3p	Homo sapiens	CALM1	801	Homo sapiens	PAR-CLIP	Functional MTI (Weak)	23446348
MIRT524577	hsa-miR-4659b-3p	Homo sapiens	CALM1	801	Homo sapiens	PAR-CLIP	Functional MTI (Weak)	23446348
MIRT524578	hsa-miR-4659a-3p	Homo sapiens	CALM1	801	Homo sapiens	PAR-CLIP	Functional MTI (Weak)	23446348
MIRT538736	hsa-miR-4639-5p	Homo sapiens	CALM1	801	Homo sapiens	PAR-CLIP	Functional MTI (Weak)	22012620
MIRT538737	hsa-miR-502-5p	Homo sapiens	CALM1	801	Homo sapiens	PAR-CLIP	Functional MTI (Weak)	22012620
MIRT538738	hsa-miR-5589-3p	Homo sapiens	CALM1	801	Homo sapiens	PAR-CLIP	Functional MTI (Weak)	22012620
MIRT538739	hsa-miR-1915-5p	Homo sapiens	CALM1	801	Homo sapiens	PAR-CLIP	Functional MTI (Weak)	22012620
MIRT538740	hsa-miR-6841-3p	Homo sapiens	CALM1	801	Homo sapiens	PAR-CLIP	Functional MTI (Weak)	22012620
MIRT538741	hsa-miR-4662a-3p	Homo sapiens	CALM1	801	Homo sapiens	PAR-CLIP	Functional MTI (Weak)	22012620
MIRT538742	hsa-miR-3591-3p	Homo sapiens	CALM1	801	Homo sapiens	PAR-CLIP	Functional MTI (Weak)	22012620
MIRT538743	hsa-miR-21-3p	Homo sapiens	CALM1	801	Homo sapiens	PAR-CLIP	Functional MTI (Weak)	22012620
MIRT549060	hsa-miR-5696	Homo sapiens	CALM1	801	Homo sapiens	PAR-CLIP	Functional MTI (Weak)	21572407
MIRT549061	hsa-miR-1468-3p	Homo sapiens	CALM1	801	Homo sapiens	PAR-CLIP	Functional MTI (Weak)	21572407
MIRT549062	hsa-miR-548x-5p	Homo sapiens	CALM1	801	Homo sapiens	PAR-CLIP	Functional MTI (Weak)	21572407
MIRT549063	hsa-miR-548g-5p	Homo sapiens	CALM1	801	Homo sapiens	PAR-CLIP	Functional MTI (Weak)	21572407
MIRT549064	hsa-miR-548f-5p	Homo sapiens	CALM1	801	Homo sapiens	PAR-CLIP	Functional MTI (Weak)	21572407
MIRT549065	hsa-miR-548aj-5p	Homo sapiens	CALM1	801	Homo sapiens	PAR-CLIP	Functional MTI (Weak)	21572407
MIRT555301	hsa-miR-6818-5p	Homo sapiens	PPP3CB	5532	Homo sapiens	PAR-CLIP	Functional MTI (Weak)	21572407
MIRT555302	hsa-miR-29a-5p	Homo sapiens	PPP3CB	5532	Homo sapiens	PAR-CLIP	Functional MTI (Weak)	21572407
MIRT555303	hsa-miR-3920	Homo sapiens	PPP3CB	5532	Homo sapiens	PAR-CLIP	Functional MTI (Weak)	21572407
MIRT555304	hsa-miR-30e-5p	Homo sapiens	PPP3CB	5532	Homo sapiens	PAR-CLIP	Functional MTI (Weak)	21572407
MIRT555305	hsa-miR-30d-5p	Homo sapiens	PPP3CB	5532	Homo sapiens	PAR-CLIP	Functional MTI (Weak)	21572407
MIRT555306	hsa-miR-30a-5p	Homo sapiens	PPP3CB	5532	Homo sapiens	PAR-CLIP	Functional MTI (Weak)	21572407
MIRT555307	hsa-miR-30b-5p	Homo sapiens	PPP3CB	5532	Homo sapiens	PAR-CLIP	Functional MTI (Weak)	21572407
MIRT555308	hsa-miR-30c-5p	Homo sapiens	PPP3CB	5532	Homo sapiens	PAR-CLIP	Functional MTI (Weak)	21572407
MIRT557458	hsa-miR-4465	Homo sapiens	GSK3B	2932	Homo sapiens	PAR-CLIP	Functional MTI (Weak)	20371350
MIRT557458	hsa-miR-4465	Homo sapiens	GSK3B	2932	Homo sapiens	PAR-CLIP	Functional MTI (Weak)	21572407
MIRT557459	hsa-miR-26b-5p	Homo sapiens	GSK3B	2932	Homo sapiens	PAR-CLIP	Functional MTI (Weak)	20371350
MIRT557459	hsa-miR-26b-5p	Homo sapiens	GSK3B	2932	Homo sapiens	PAR-CLIP	Functional MTI (Weak)	21572407
MIRT557460	hsa-miR-1297	Homo sapiens	GSK3B	2932	Homo sapiens	PAR-CLIP	Functional MTI (Weak)	20371350
MIRT557460	hsa-miR-1297	Homo sapiens	GSK3B	2932	Homo sapiens	PAR-CLIP	Functional MTI (Weak)	21572407
MIRT557461	hsa-miR-5697	Homo sapiens	GSK3B	2932	Homo sapiens	PAR-CLIP	Functional MTI (Weak)	20371350
MIRT557461	hsa-miR-5697	Homo sapiens	GSK3B	2932	Homo sapiens	PAR-CLIP	Functional MTI (Weak)	21572407
MIRT557462	hsa-miR-5683	Homo sapiens	GSK3B	2932	Homo sapiens	PAR-CLIP	Functional MTI (Weak)	20371350
MIRT557462	hsa-miR-5683	Homo sapiens	GSK3B	2932	Homo sapiens	PAR-CLIP	Functional MTI (Weak)	21572407
MIRT557463	hsa-miR-33a-3p	Homo sapiens	GSK3B	2932	Homo sapiens	PAR-CLIP	Functional MTI (Weak)	20371350
MIRT557463	hsa-miR-33a-3p	Homo sapiens	GSK3B	2932	Homo sapiens	PAR-CLIP	Functional MTI (Weak)	21572407
MIRT557464	hsa-miR-409-3p	Homo sapiens	GSK3B	2932	Homo sapiens	PAR-CLIP	Functional MTI (Weak)	20371350
MIRT557464	hsa-miR-409-3p	Homo sapiens	GSK3B	2932	Homo sapiens	PAR-CLIP	Functional MTI (Weak)	21572407
MIRT557465	hsa-miR-1910-5p	Homo sapiens	GSK3B	2932	Homo sapiens	PAR-CLIP	Functional MTI (Weak)	21572407
MIRT557465	hsa-miR-1910-5p	Homo sapiens	GSK3B	2932	Homo sapiens	HITS-CLIP	Functional MTI (Weak)	23313552
MIRT558543	hsa-miR-3187-3p	Homo sapiens	CSNK1A1	1452	Homo sapiens	PAR-CLIP	Functional MTI (Weak)	21572407
MIRT558544	hsa-miR-7159-5p	Homo sapiens	CSNK1A1	1452	Homo sapiens	PAR-CLIP	Functional MTI (Weak)	21572407
MIRT558545	hsa-miR-4529-5p	Homo sapiens	CSNK1A1	1452	Homo sapiens	PAR-CLIP	Functional MTI (Weak)	21572407
MIRT558546	hsa-miR-4709-5p	Homo sapiens	CSNK1A1	1452	Homo sapiens	PAR-CLIP	Functional MTI (Weak)	21572407
MIRT558547	hsa-miR-4272	Homo sapiens	CSNK1A1	1452	Homo sapiens	PAR-CLIP	Functional MTI (Weak)	21572407
MIRT558548	hsa-miR-1244	Homo sapiens	CSNK1A1	1452	Homo sapiens	PAR-CLIP	Functional MTI (Weak)	21572407
MIRT558549	hsa-miR-181d-5p	Homo sapiens	CSNK1A1	1452	Homo sapiens	PAR-CLIP	Functional MTI (Weak)	21572407
MIRT558550	hsa-miR-181a-5p	Homo sapiens	CSNK1A1	1452	Homo sapiens	PAR-CLIP	Functional MTI (Weak)	21572407
MIRT558551	hsa-miR-181b-5p	Homo sapiens	CSNK1A1	1452	Homo sapiens	PAR-CLIP	Functional MTI (Weak)	21572407
MIRT558552	hsa-miR-4262	Homo sapiens	CSNK1A1	1452	Homo sapiens	PAR-CLIP	Functional MTI (Weak)	21572407
MIRT558553	hsa-miR-181c-5p	Homo sapiens	CSNK1A1	1452	Homo sapiens	PAR-CLIP	Functional MTI (Weak)	21572407
MIRT558554	hsa-miR-505-3p	Homo sapiens	CSNK1A1	1452	Homo sapiens	PAR-CLIP	Functional MTI (Weak)	21572407
MIRT558555	hsa-miR-421	Homo sapiens	CSNK1A1	1452	Homo sapiens	PAR-CLIP	Functional MTI (Weak)	21572407
MIRT558556	hsa-miR-199b-3p	Homo sapiens	CSNK1A1	1452	Homo sapiens	PAR-CLIP	Functional MTI (Weak)	21572407
MIRT558557	hsa-miR-199a-3p	Homo sapiens	CSNK1A1	1452	Homo sapiens	PAR-CLIP	Functional MTI (Weak)	21572407
MIRT558558	hsa-miR-3129-5p	Homo sapiens	CSNK1A1	1452	Homo sapiens	PAR-CLIP	Functional MTI (Weak)	21572407
MIRT558970	hsa-miR-1324	Homo sapiens	CALM1	801	Homo sapiens	PAR-CLIP	Functional MTI (Weak)	21572407
MIRT558971	hsa-miR-382-3p	Homo sapiens	CALM1	801	Homo sapiens	PAR-CLIP	Functional MTI (Weak)	21572407
MIRT558972	hsa-miR-4538	Homo sapiens	CALM1	801	Homo sapiens	PAR-CLIP	Functional MTI (Weak)	21572407
MIRT558973	hsa-miR-4453	Homo sapiens	CALM1	801	Homo sapiens	PAR-CLIP	Functional MTI (Weak)	21572407
MIRT558974	hsa-miR-6882-5p	Homo sapiens	CALM1	801	Homo sapiens	PAR-CLIP	Functional MTI (Weak)	21572407
MIRT558975	hsa-miR-570-5p	Homo sapiens	CALM1	801	Homo sapiens	PAR-CLIP	Functional MTI (Weak)	21572407
MIRT558976	hsa-miR-548ba	Homo sapiens	CALM1	801	Homo sapiens	PAR-CLIP	Functional MTI (Weak)	21572407
MIRT558977	hsa-miR-548ai	Homo sapiens	CALM1	801	Homo sapiens	PAR-CLIP	Functional MTI (Weak)	21572407
MIRT558978	hsa-miR-548ag	Homo sapiens	CALM1	801	Homo sapiens	PAR-CLIP	Functional MTI (Weak)	21572407
MIRT558979	hsa-miR-5582-3p	Homo sapiens	CALM1	801	Homo sapiens	PAR-CLIP	Functional MTI (Weak)	21572407
MIRT566293	hsa-miR-578	Homo sapiens	PPP3R1	5534	Homo sapiens	PAR-CLIP	Functional MTI (Weak)	20371350
MIRT566294	hsa-miR-340-5p	Homo sapiens	PPP3R1	5534	Homo sapiens	PAR-CLIP	Functional MTI (Weak)	20371350
MIRT566295	hsa-miR-3185	Homo sapiens	PPP3R1	5534	Homo sapiens	PAR-CLIP	Functional MTI (Weak)	20371350
MIRT566296	hsa-miR-3163	Homo sapiens	PPP3R1	5534	Homo sapiens	PAR-CLIP	Functional MTI (Weak)	20371350
MIRT566642	hsa-miR-3163	Homo sapiens	NFATC3	4775	Homo sapiens	PAR-CLIP	Functional MTI (Weak)	20371350
MIRT566643	hsa-miR-548t-5p	Homo sapiens	NFATC3	4775	Homo sapiens	PAR-CLIP	Functional MTI (Weak)	20371350
MIRT566644	hsa-miR-548az-5p	Homo sapiens	NFATC3	4775	Homo sapiens	PAR-CLIP	Functional MTI (Weak)	20371350
MIRT566645	hsa-miR-548e-5p	Homo sapiens	NFATC3	4775	Homo sapiens	PAR-CLIP	Functional MTI (Weak)	20371350
MIRT566822	hsa-miR-599	Homo sapiens	MAP3K7	6885	Homo sapiens	PAR-CLIP	Functional MTI (Weak)	20371350
MIRT566823	hsa-miR-4524b-5p	Homo sapiens	MAP3K7	6885	Homo sapiens	PAR-CLIP	Functional MTI (Weak)	20371350
MIRT566824	hsa-miR-4524a-5p	Homo sapiens	MAP3K7	6885	Homo sapiens	PAR-CLIP	Functional MTI (Weak)	20371350
MIRT566825	hsa-miR-5589-3p	Homo sapiens	MAP3K7	6885	Homo sapiens	PAR-CLIP	Functional MTI (Weak)	20371350
MIRT566826	hsa-miR-875-5p	Homo sapiens	MAP3K7	6885	Homo sapiens	PAR-CLIP	Functional MTI (Weak)	20371350
MIRT566827	hsa-miR-646	Homo sapiens	MAP3K7	6885	Homo sapiens	PAR-CLIP	Functional MTI (Weak)	20371350
MIRT566828	hsa-miR-503-5p	Homo sapiens	MAP3K7	6885	Homo sapiens	PAR-CLIP	Functional MTI (Weak)	20371350
MIRT566829	hsa-miR-6838-5p	Homo sapiens	MAP3K7	6885	Homo sapiens	PAR-CLIP	Functional MTI (Weak)	20371350
MIRT566830	hsa-miR-497-5p	Homo sapiens	MAP3K7	6885	Homo sapiens	PAR-CLIP	Functional MTI (Weak)	20371350
MIRT566831	hsa-miR-424-5p	Homo sapiens	MAP3K7	6885	Homo sapiens	PAR-CLIP	Functional MTI (Weak)	20371350
MIRT566832	hsa-miR-195-5p	Homo sapiens	MAP3K7	6885	Homo sapiens	PAR-CLIP	Functional MTI (Weak)	20371350
MIRT566833	hsa-miR-15b-5p	Homo sapiens	MAP3K7	6885	Homo sapiens	PAR-CLIP	Functional MTI (Weak)	20371350
MIRT566834	hsa-miR-15a-5p	Homo sapiens	MAP3K7	6885	Homo sapiens	PAR-CLIP	Functional MTI (Weak)	20371350
MIRT567898	hsa-miR-3942-3p	Homo sapiens	CSNK1A1	1452	Homo sapiens	PAR-CLIP	Functional MTI (Weak)	20371350
MIRT567899	hsa-miR-205-3p	Homo sapiens	CSNK1A1	1452	Homo sapiens	PAR-CLIP	Functional MTI (Weak)	20371350
MIRT571779	hsa-miR-5692a	Homo sapiens	PPP3R1	5534	Homo sapiens	PAR-CLIP	Functional MTI (Weak)	20371350
MIRT572801	hsa-miR-1178-3p	Homo sapiens	PPP3CB	5532	Homo sapiens	PAR-CLIP	Functional MTI (Weak)	20371350
MIRT572802	hsa-miR-6509-3p	Homo sapiens	PPP3CB	5532	Homo sapiens	PAR-CLIP	Functional MTI (Weak)	20371350
MIRT572803	hsa-miR-5093	Homo sapiens	PPP3CB	5532	Homo sapiens	PAR-CLIP	Functional MTI (Weak)	20371350
MIRT572804	hsa-miR-3189-5p	Homo sapiens	PPP3CB	5532	Homo sapiens	PAR-CLIP	Functional MTI (Weak)	20371350
MIRT572805	hsa-miR-4758-3p	Homo sapiens	PPP3CB	5532	Homo sapiens	PAR-CLIP	Functional MTI (Weak)	20371350
MIRT572806	hsa-miR-5699-5p	Homo sapiens	PPP3CB	5532	Homo sapiens	PAR-CLIP	Functional MTI (Weak)	20371350
MIRT572807	hsa-miR-875-3p	Homo sapiens	PPP3CB	5532	Homo sapiens	PAR-CLIP	Functional MTI (Weak)	20371350
MIRT572808	hsa-miR-1273g-3p	Homo sapiens	PPP3CB	5532	Homo sapiens	PAR-CLIP	Functional MTI (Weak)	20371350
MIRT572809	hsa-miR-6769a-3p	Homo sapiens	PPP3CB	5532	Homo sapiens	PAR-CLIP	Functional MTI (Weak)	20371350
MIRT572810	hsa-miR-181a-2-3p	Homo sapiens	PPP3CB	5532	Homo sapiens	PAR-CLIP	Functional MTI (Weak)	20371350
MIRT611910	hsa-miR-8064	Homo sapiens	GSK3B	2932	Homo sapiens	HITS-CLIP	Functional MTI (Weak)	23824327
MIRT611911	hsa-miR-4643	Homo sapiens	GSK3B	2932	Homo sapiens	HITS-CLIP	Functional MTI (Weak)	23824327
MIRT611912	hsa-miR-8485	Homo sapiens	GSK3B	2932	Homo sapiens	HITS-CLIP	Functional MTI (Weak)	23824327
MIRT616538	hsa-miR-4512	Homo sapiens	NFATC2	4773	Homo sapiens	HITS-CLIP	Functional MTI (Weak)	23824327
MIRT616539	hsa-miR-3157-5p	Homo sapiens	NFATC2	4773	Homo sapiens	HITS-CLIP	Functional MTI (Weak)	23824327
MIRT616540	hsa-miR-20b-3p	Homo sapiens	NFATC2	4773	Homo sapiens	HITS-CLIP	Functional MTI (Weak)	23824327
MIRT616541	hsa-miR-1304-3p	Homo sapiens	NFATC2	4773	Homo sapiens	HITS-CLIP	Functional MTI (Weak)	23824327
MIRT616542	hsa-miR-1208	Homo sapiens	NFATC2	4773	Homo sapiens	HITS-CLIP	Functional MTI (Weak)	23824327
MIRT616543	hsa-miR-6760-3p	Homo sapiens	NFATC2	4773	Homo sapiens	HITS-CLIP	Functional MTI (Weak)	23824327
MIRT616544	hsa-miR-1183	Homo sapiens	NFATC2	4773	Homo sapiens	HITS-CLIP	Functional MTI (Weak)	23824327
MIRT616545	hsa-miR-10a-3p	Homo sapiens	NFATC2	4773	Homo sapiens	HITS-CLIP	Functional MTI (Weak)	23824327
MIRT616652	hsa-miR-4668-5p	Homo sapiens	ORAI1	84876	Homo sapiens	HITS-CLIP	Functional MTI (Weak)	23824327
MIRT616653	hsa-miR-4799-5p	Homo sapiens	ORAI1	84876	Homo sapiens	HITS-CLIP	Functional MTI (Weak)	23824327
MIRT616654	hsa-miR-6505-3p	Homo sapiens	ORAI1	84876	Homo sapiens	HITS-CLIP	Functional MTI (Weak)	23824327
MIRT616655	hsa-miR-4509	Homo sapiens	ORAI1	84876	Homo sapiens	HITS-CLIP	Functional MTI (Weak)	23824327
MIRT616656	hsa-miR-4744	Homo sapiens	ORAI1	84876	Homo sapiens	HITS-CLIP	Functional MTI (Weak)	23824327
MIRT616657	hsa-miR-8087	Homo sapiens	ORAI1	84876	Homo sapiens	HITS-CLIP	Functional MTI (Weak)	23824327
MIRT616658	hsa-miR-7161-5p	Homo sapiens	ORAI1	84876	Homo sapiens	HITS-CLIP	Functional MTI (Weak)	23824327
MIRT616659	hsa-miR-548u	Homo sapiens	ORAI1	84876	Homo sapiens	HITS-CLIP	Functional MTI (Weak)	23824327
MIRT616660	hsa-miR-186-5p	Homo sapiens	ORAI1	84876	Homo sapiens	HITS-CLIP	Functional MTI (Weak)	23824327
MIRT616661	hsa-miR-3133	Homo sapiens	ORAI1	84876	Homo sapiens	HITS-CLIP	Functional MTI (Weak)	23824327
MIRT616953	hsa-miR-335-3p	Homo sapiens	MAP3K7	6885	Homo sapiens	HITS-CLIP	Functional MTI (Weak)	23824327
MIRT616954	hsa-miR-1305	Homo sapiens	MAP3K7	6885	Homo sapiens	HITS-CLIP	Functional MTI (Weak)	23824327
MIRT616955	hsa-miR-607	Homo sapiens	MAP3K7	6885	Homo sapiens	HITS-CLIP	Functional MTI (Weak)	23824327
MIRT616956	hsa-miR-664b-3p	Homo sapiens	MAP3K7	6885	Homo sapiens	HITS-CLIP	Functional MTI (Weak)	23824327
MIRT616957	hsa-miR-579-3p	Homo sapiens	MAP3K7	6885	Homo sapiens	HITS-CLIP	Functional MTI (Weak)	23824327
MIRT616958	hsa-miR-5696	Homo sapiens	MAP3K7	6885	Homo sapiens	HITS-CLIP	Functional MTI (Weak)	23824327
MIRT616959	hsa-miR-3671	Homo sapiens	MAP3K7	6885	Homo sapiens	HITS-CLIP	Functional MTI (Weak)	23824327
MIRT616960	hsa-miR-153-5p	Homo sapiens	MAP3K7	6885	Homo sapiens	HITS-CLIP	Functional MTI (Weak)	23824327
MIRT616961	hsa-miR-1250-3p	Homo sapiens	MAP3K7	6885	Homo sapiens	HITS-CLIP	Functional MTI (Weak)	23824327
MIRT623110	hsa-miR-466	Homo sapiens	NFATC2	4773	Homo sapiens	HITS-CLIP	Functional MTI (Weak)	23824327
MIRT623111	hsa-miR-4672	Homo sapiens	NFATC2	4773	Homo sapiens	HITS-CLIP	Functional MTI (Weak)	23824327
MIRT623112	hsa-miR-3941	Homo sapiens	NFATC2	4773	Homo sapiens	HITS-CLIP	Functional MTI (Weak)	23824327
MIRT623113	hsa-miR-496	Homo sapiens	NFATC2	4773	Homo sapiens	HITS-CLIP	Functional MTI (Weak)	23824327
MIRT623114	hsa-miR-6504-3p	Homo sapiens	NFATC2	4773	Homo sapiens	HITS-CLIP	Functional MTI (Weak)	23824327
MIRT623115	hsa-miR-4700-3p	Homo sapiens	NFATC2	4773	Homo sapiens	HITS-CLIP	Functional MTI (Weak)	23824327
MIRT623116	hsa-miR-8485	Homo sapiens	NFATC2	4773	Homo sapiens	HITS-CLIP	Functional MTI (Weak)	23824327
MIRT629076	hsa-miR-383-3p	Homo sapiens	GSK3B	2932	Homo sapiens	HITS-CLIP	Functional MTI (Weak)	23824327
MIRT629077	hsa-miR-3065-3p	Homo sapiens	GSK3B	2932	Homo sapiens	HITS-CLIP	Functional MTI (Weak)	23824327
MIRT639061	hsa-miR-4755-5p	Homo sapiens	NFATC1	4772	Homo sapiens	HITS-CLIP	Functional MTI (Weak)	23824327
MIRT639062	hsa-miR-5006-3p	Homo sapiens	NFATC1	4772	Homo sapiens	HITS-CLIP	Functional MTI (Weak)	23824327
MIRT639063	hsa-miR-211-5p	Homo sapiens	NFATC1	4772	Homo sapiens	HITS-CLIP	Functional MTI (Weak)	23824327
MIRT639064	hsa-miR-204-5p	Homo sapiens	NFATC1	4772	Homo sapiens	HITS-CLIP	Functional MTI (Weak)	23824327
MIRT639065	hsa-miR-623	Homo sapiens	NFATC1	4772	Homo sapiens	HITS-CLIP	Functional MTI (Weak)	23824327
MIRT639066	hsa-miR-324-5p	Homo sapiens	NFATC1	4772	Homo sapiens	HITS-CLIP	Functional MTI (Weak)	23824327
MIRT639067	hsa-miR-3124-3p	Homo sapiens	NFATC1	4772	Homo sapiens	HITS-CLIP	Functional MTI (Weak)	23824327
MIRT639068	hsa-miR-4671-5p	Homo sapiens	NFATC1	4772	Homo sapiens	HITS-CLIP	Functional MTI (Weak)	23824327
MIRT639069	hsa-miR-6832-3p	Homo sapiens	NFATC1	4772	Homo sapiens	HITS-CLIP	Functional MTI (Weak)	23824327
MIRT640855	hsa-miR-4459	Homo sapiens	NFATC2	4773	Homo sapiens	HITS-CLIP	Functional MTI (Weak)	23824327
MIRT640856	hsa-miR-603	Homo sapiens	NFATC2	4773	Homo sapiens	HITS-CLIP	Functional MTI (Weak)	23824327
MIRT642124	hsa-miR-3152-5p	Homo sapiens	DYRK1A	1859	Homo sapiens	HITS-CLIP	Functional MTI (Weak)	19536157
MIRT642124	hsa-miR-3152-5p	Homo sapiens	DYRK1A	1859	Homo sapiens	HITS-CLIP	Functional MTI (Weak)	23824327
MIRT642125	hsa-miR-6836-3p	Homo sapiens	DYRK1A	1859	Homo sapiens	HITS-CLIP	Functional MTI (Weak)	19536157
MIRT642125	hsa-miR-6836-3p	Homo sapiens	DYRK1A	1859	Homo sapiens	HITS-CLIP	Functional MTI (Weak)	23824327
MIRT642126	hsa-miR-5692a	Homo sapiens	DYRK1A	1859	Homo sapiens	HITS-CLIP	Functional MTI (Weak)	19536157
MIRT642126	hsa-miR-5692a	Homo sapiens	DYRK1A	1859	Homo sapiens	HITS-CLIP	Functional MTI (Weak)	23824327
MIRT654811	hsa-miR-629-3p	Homo sapiens	PPP3R1	5534	Homo sapiens	HITS-CLIP	Functional MTI (Weak)	23824327
MIRT654812	hsa-miR-5006-3p	Homo sapiens	PPP3R1	5534	Homo sapiens	HITS-CLIP	Functional MTI (Weak)	23824327
MIRT654813	hsa-miR-4755-5p	Homo sapiens	PPP3R1	5534	Homo sapiens	HITS-CLIP	Functional MTI (Weak)	23824327
MIRT654814	hsa-miR-519e-5p	Homo sapiens	PPP3R1	5534	Homo sapiens	HITS-CLIP	Functional MTI (Weak)	23824327
MIRT654815	hsa-miR-515-5p	Homo sapiens	PPP3R1	5534	Homo sapiens	HITS-CLIP	Functional MTI (Weak)	23824327
MIRT654816	hsa-miR-623	Homo sapiens	PPP3R1	5534	Homo sapiens	HITS-CLIP	Functional MTI (Weak)	23824327
MIRT654817	hsa-miR-6734-3p	Homo sapiens	PPP3R1	5534	Homo sapiens	HITS-CLIP	Functional MTI (Weak)	23824327
MIRT654818	hsa-miR-6756-3p	Homo sapiens	PPP3R1	5534	Homo sapiens	HITS-CLIP	Functional MTI (Weak)	23824327
MIRT654819	hsa-miR-3127-3p	Homo sapiens	PPP3R1	5534	Homo sapiens	HITS-CLIP	Functional MTI (Weak)	23824327
MIRT654820	hsa-miR-211-5p	Homo sapiens	PPP3R1	5534	Homo sapiens	HITS-CLIP	Functional MTI (Weak)	23824327
MIRT654821	hsa-miR-204-5p	Homo sapiens	PPP3R1	5534	Homo sapiens	HITS-CLIP	Functional MTI (Weak)	23824327
MIRT657555	hsa-miR-377-3p	Homo sapiens	GSK3B	2932	Homo sapiens	HITS-CLIP	Functional MTI (Weak)	23824327
MIRT657556	hsa-miR-6787-3p	Homo sapiens	GSK3B	2932	Homo sapiens	HITS-CLIP	Functional MTI (Weak)	23824327
MIRT657557	hsa-miR-548c-3p	Homo sapiens	GSK3B	2932	Homo sapiens	HITS-CLIP	Functional MTI (Weak)	23824327
MIRT668625	hsa-miR-335-3p	Homo sapiens	DYRK1A	1859	Homo sapiens	HITS-CLIP	Functional MTI (Weak)	23824327
MIRT668626	hsa-miR-30e-3p	Homo sapiens	DYRK1A	1859	Homo sapiens	HITS-CLIP	Functional MTI (Weak)	23824327
MIRT668627	hsa-miR-30d-3p	Homo sapiens	DYRK1A	1859	Homo sapiens	HITS-CLIP	Functional MTI (Weak)	23824327
MIRT668628	hsa-miR-30a-3p	Homo sapiens	DYRK1A	1859	Homo sapiens	HITS-CLIP	Functional MTI (Weak)	23824327
MIRT668629	hsa-miR-550b-2-5p	Homo sapiens	DYRK1A	1859	Homo sapiens	HITS-CLIP	Functional MTI (Weak)	23824327
MIRT668630	hsa-miR-3157-5p	Homo sapiens	DYRK1A	1859	Homo sapiens	HITS-CLIP	Functional MTI (Weak)	23824327
MIRT668631	hsa-miR-550a-5p	Homo sapiens	DYRK1A	1859	Homo sapiens	HITS-CLIP	Functional MTI (Weak)	23824327
MIRT668632	hsa-miR-550a-3-5p	Homo sapiens	DYRK1A	1859	Homo sapiens	HITS-CLIP	Functional MTI (Weak)	23824327
MIRT668633	hsa-miR-1271-3p	Homo sapiens	DYRK1A	1859	Homo sapiens	HITS-CLIP	Functional MTI (Weak)	23824327
MIRT668634	hsa-miR-3135a	Homo sapiens	DYRK1A	1859	Homo sapiens	HITS-CLIP	Functional MTI (Weak)	23824327
MIRT668635	hsa-miR-4716-5p	Homo sapiens	DYRK1A	1859	Homo sapiens	HITS-CLIP	Functional MTI (Weak)	23824327
MIRT668636	hsa-miR-5685	Homo sapiens	DYRK1A	1859	Homo sapiens	HITS-CLIP	Functional MTI (Weak)	23824327
MIRT668637	hsa-miR-4690-3p	Homo sapiens	DYRK1A	1859	Homo sapiens	HITS-CLIP	Functional MTI (Weak)	23824327
MIRT668638	hsa-miR-7151-5p	Homo sapiens	DYRK1A	1859	Homo sapiens	HITS-CLIP	Functional MTI (Weak)	23824327
MIRT672939	hsa-miR-6514-3p	Homo sapiens	AKAP5	9495	Homo sapiens	HITS-CLIP	Functional MTI (Weak)	23824327
MIRT672940	hsa-miR-6126	Homo sapiens	AKAP5	9495	Homo sapiens	HITS-CLIP	Functional MTI (Weak)	23824327
MIRT672941	hsa-miR-7977	Homo sapiens	AKAP5	9495	Homo sapiens	HITS-CLIP	Functional MTI (Weak)	23824327
MIRT672942	hsa-miR-675-5p	Homo sapiens	AKAP5	9495	Homo sapiens	HITS-CLIP	Functional MTI (Weak)	23824327
MIRT672943	hsa-miR-4466	Homo sapiens	AKAP5	9495	Homo sapiens	HITS-CLIP	Functional MTI (Weak)	23824327
MIRT672944	hsa-miR-24-3p	Homo sapiens	AKAP5	9495	Homo sapiens	HITS-CLIP	Functional MTI (Weak)	23824327
MIRT672945	hsa-miR-4284	Homo sapiens	AKAP5	9495	Homo sapiens	HITS-CLIP	Functional MTI (Weak)	23824327
MIRT672946	hsa-miR-6847-3p	Homo sapiens	AKAP5	9495	Homo sapiens	HITS-CLIP	Functional MTI (Weak)	23824327
MIRT672947	hsa-miR-4746-3p	Homo sapiens	AKAP5	9495	Homo sapiens	HITS-CLIP	Functional MTI (Weak)	23824327
MIRT672948	hsa-miR-6811-3p	Homo sapiens	AKAP5	9495	Homo sapiens	HITS-CLIP	Functional MTI (Weak)	23824327
MIRT672949	hsa-miR-214-5p	Homo sapiens	AKAP5	9495	Homo sapiens	HITS-CLIP	Functional MTI (Weak)	23824327
MIRT672950	hsa-miR-4493	Homo sapiens	AKAP5	9495	Homo sapiens	HITS-CLIP	Functional MTI (Weak)	23824327
MIRT672951	hsa-miR-605-3p	Homo sapiens	AKAP5	9495	Homo sapiens	HITS-CLIP	Functional MTI (Weak)	23824327
MIRT672952	hsa-miR-383-3p	Homo sapiens	AKAP5	9495	Homo sapiens	HITS-CLIP	Functional MTI (Weak)	23824327
MIRT711973	hsa-miR-539-3p	Homo sapiens	HOMER2	9455	Homo sapiens	HITS-CLIP	Functional MTI (Weak)	19536157
MIRT711974	hsa-miR-485-3p	Homo sapiens	HOMER2	9455	Homo sapiens	HITS-CLIP	Functional MTI (Weak)	19536157
MIRT711975	hsa-miR-4291	Homo sapiens	HOMER2	9455	Homo sapiens	HITS-CLIP	Functional MTI (Weak)	19536157
MIRT711976	hsa-miR-761	Homo sapiens	HOMER2	9455	Homo sapiens	HITS-CLIP	Functional MTI (Weak)	19536157
MIRT711977	hsa-miR-3619-5p	Homo sapiens	HOMER2	9455	Homo sapiens	HITS-CLIP	Functional MTI (Weak)	19536157
MIRT711978	hsa-miR-214-3p	Homo sapiens	HOMER2	9455	Homo sapiens	HITS-CLIP	Functional MTI (Weak)	19536157
MIRT711979	hsa-miR-922	Homo sapiens	HOMER2	9455	Homo sapiens	HITS-CLIP	Functional MTI (Weak)	19536157
MIRT711980	hsa-miR-5007-5p	Homo sapiens	HOMER2	9455	Homo sapiens	HITS-CLIP	Functional MTI (Weak)	19536157
MIRT716660	hsa-miR-4750-3p	Homo sapiens	NFATC4	4776	Homo sapiens	HITS-CLIP	Functional MTI (Weak)	19536157
MIRT716661	hsa-miR-7114-3p	Homo sapiens	NFATC4	4776	Homo sapiens	HITS-CLIP	Functional MTI (Weak)	19536157
MIRT716662	hsa-miR-1180-5p	Homo sapiens	NFATC4	4776	Homo sapiens	HITS-CLIP	Functional MTI (Weak)	19536157
MIRT716663	hsa-miR-3667-5p	Homo sapiens	NFATC4	4776	Homo sapiens	HITS-CLIP	Functional MTI (Weak)	19536157
MIRT724476	hsa-miR-6809-3p	Homo sapiens	CSNK1A1	1452	Homo sapiens	HITS-CLIP	Functional MTI (Weak)	19536157
MIRT724477	hsa-miR-6833-3p	Homo sapiens	CSNK1A1	1452	Homo sapiens	HITS-CLIP	Functional MTI (Weak)	19536157
MIRT724478	hsa-miR-4768-5p	Homo sapiens	CSNK1A1	1452	Homo sapiens	HITS-CLIP	Functional MTI (Weak)	19536157
MIRT724479	hsa-miR-4753-3p	Homo sapiens	CSNK1A1	1452	Homo sapiens	HITS-CLIP	Functional MTI (Weak)	19536157
MIRT724480	hsa-miR-6873-3p	Homo sapiens	CSNK1A1	1452	Homo sapiens	HITS-CLIP	Functional MTI (Weak)	19536157
MIRT724481	hsa-miR-4465	Homo sapiens	CSNK1A1	1452	Homo sapiens	HITS-CLIP	Functional MTI (Weak)	19536157
MIRT724482	hsa-miR-26b-5p	Homo sapiens	CSNK1A1	1452	Homo sapiens	HITS-CLIP	Functional MTI (Weak)	19536157
MIRT724483	hsa-miR-26a-5p	Homo sapiens	CSNK1A1	1452	Homo sapiens	HITS-CLIP	Functional MTI (Weak)	19536157
MIRT724484	hsa-miR-1297	Homo sapiens	CSNK1A1	1452	Homo sapiens	HITS-CLIP	Functional MTI (Weak)	19536157
MIRT724485	hsa-miR-3160-5p	Homo sapiens	CSNK1A1	1452	Homo sapiens	HITS-CLIP	Functional MTI (Weak)	19536157
MIRT724486	hsa-miR-942-5p	Homo sapiens	CSNK1A1	1452	Homo sapiens	HITS-CLIP	Functional MTI (Weak)	19536157
MIRT724487	hsa-miR-1236-3p	Homo sapiens	CSNK1A1	1452	Homo sapiens	HITS-CLIP	Functional MTI (Weak)	19536157
MIRT724488	hsa-miR-6515-3p	Homo sapiens	CSNK1A1	1452	Homo sapiens	HITS-CLIP	Functional MTI (Weak)	19536157
MIRT724489	hsa-miR-6845-3p	Homo sapiens	CSNK1A1	1452	Homo sapiens	HITS-CLIP	Functional MTI (Weak)	19536157
MIRT724490	hsa-miR-136-5p	Homo sapiens	CSNK1A1	1452	Homo sapiens	HITS-CLIP	Functional MTI (Weak)	19536157
MIRT726875	hsa-miR-519d-3p	Homo sapiens	PPP3R1	5534	Homo sapiens	HITS-CLIP	Functional MTI (Weak)	22473208
MIRT726876	hsa-miR-93-5p	Homo sapiens	PPP3R1	5534	Homo sapiens	HITS-CLIP	Functional MTI (Weak)	22473208
MIRT726877	hsa-miR-17-5p	Homo sapiens	PPP3R1	5534	Homo sapiens	HITS-CLIP	Functional MTI (Weak)	22473208
MIRT726878	hsa-miR-20b-5p	Homo sapiens	PPP3R1	5534	Homo sapiens	HITS-CLIP	Functional MTI (Weak)	22473208
MIRT727520	hsa-miR-16-5p	Homo sapiens	GSK3B	2932	Homo sapiens	HITS-CLIP	Functional MTI (Weak)	22473208
MIRT727521	hsa-miR-195-5p	Homo sapiens	GSK3B	2932	Homo sapiens	HITS-CLIP	Functional MTI (Weak)	22473208
MIRT727522	hsa-miR-15b-5p	Homo sapiens	GSK3B	2932	Homo sapiens	HITS-CLIP	Functional MTI (Weak)	22473208
MIRT727523	hsa-miR-15a-5p	Homo sapiens	GSK3B	2932	Homo sapiens	HITS-CLIP	Functional MTI (Weak)	22473208
MIRT654298	hsa-miR-483-3p	Homo sapiens	RCAN1	1827	Homo sapiens	HITS-CLIP	Functional MTI (Weak)	23824327
MIRT020653	hsa-miR-155-5p	Homo sapiens	STIM1	6786	Homo sapiens	Proteomics	Functional MTI (Weak)	18668040
MIRT032252	hsa-let-7b-5p	Homo sapiens	STIM1	6786	Homo sapiens	Proteomics	Functional MTI (Weak)	18668040
MIRT039069	hsa-miR-769-3p	Homo sapiens	STIM1	6786	Homo sapiens	CLASH	Functional MTI (Weak)	23622248
MIRT050790	hsa-miR-17-3p	Homo sapiens	STIM1	6786	Homo sapiens	CLASH	Functional MTI (Weak)	23622248
MIRT482781	hsa-miR-1231	Homo sapiens	STIM1	6786	Homo sapiens	PAR-CLIP	Functional MTI (Weak)	23592263
MIRT482782	hsa-miR-620	Homo sapiens	STIM1	6786	Homo sapiens	PAR-CLIP	Functional MTI (Weak)	23592263
MIRT482783	hsa-miR-1270	Homo sapiens	STIM1	6786	Homo sapiens	PAR-CLIP	Functional MTI (Weak)	23592263
MIRT482784	hsa-miR-3650	Homo sapiens	STIM1	6786	Homo sapiens	PAR-CLIP	Functional MTI (Weak)	23592263
MIRT482785	hsa-miR-4711-3p	Homo sapiens	STIM1	6786	Homo sapiens	PAR-CLIP	Functional MTI (Weak)	23592263
MIRT482786	hsa-miR-4683	Homo sapiens	STIM1	6786	Homo sapiens	PAR-CLIP	Functional MTI (Weak)	23592263
MIRT482787	hsa-miR-1273f	Homo sapiens	STIM1	6786	Homo sapiens	PAR-CLIP	Functional MTI (Weak)	23592263
MIRT482788	hsa-miR-6776-5p	Homo sapiens	STIM1	6786	Homo sapiens	PAR-CLIP	Functional MTI (Weak)	23592263
MIRT482789	hsa-miR-6861-5p	Homo sapiens	STIM1	6786	Homo sapiens	PAR-CLIP	Functional MTI (Weak)	23592263
MIRT482790	hsa-miR-4638-5p	Homo sapiens	STIM1	6786	Homo sapiens	PAR-CLIP	Functional MTI (Weak)	23592263
MIRT482791	hsa-miR-6793-3p	Homo sapiens	STIM1	6786	Homo sapiens	PAR-CLIP	Functional MTI (Weak)	23592263
MIRT000289	hsa-miR-155-5p	Homo sapiens	TAB2	23118	Homo sapiens	Luciferase reporter assay//Microarray//qRT-PCR//Western blot	Functional MTI	19193853
MIRT000289	hsa-miR-155-5p	Homo sapiens	TAB2	23118	Homo sapiens	Reporter assay	Functional MTI	20680360
MIRT000289	hsa-miR-155-5p	Homo sapiens	TAB2	23118	Homo sapiens	Luciferase reporter assay//Microarray//qRT-PCR//Western blot	Functional MTI	20852130
MIRT000289	hsa-miR-155-5p	Homo sapiens	TAB2	23118	Homo sapiens	Luciferase reporter assay	Functional MTI	23449975
MIRT000289	hsa-miR-155-5p	Homo sapiens	TAB2	23118	Homo sapiens	HITS-CLIP	Functional MTI (Weak)	22473208
MIRT000289	hsa-miR-155-5p	Homo sapiens	TAB2	23118	Homo sapiens	Reporter assay;Other	Non-Functional MTI	20584899
MIRT005057	hsa-let-7b-5p	Homo sapiens	TAB2	23118	Homo sapiens	Microarray	Functional MTI (Weak)	17699775
MIRT005057	hsa-let-7b-5p	Homo sapiens	TAB2	23118	Homo sapiens	CLASH	Functional MTI (Weak)	23622248
MIRT007040	hsa-miR-23b-3p	Homo sapiens	TAB2	23118	Homo sapiens	Luciferase reporter assay	Functional MTI	22660635
MIRT025198	hsa-miR-181a-5p	Homo sapiens	TAB2	23118	Homo sapiens	Sequencing	Functional MTI (Weak)	20371350
MIRT027769	hsa-miR-98-5p	Homo sapiens	TAB2	23118	Homo sapiens	Microarray	Functional MTI (Weak)	19088304
MIRT046408	hsa-miR-15b-5p	Homo sapiens	TAB2	23118	Homo sapiens	CLASH	Functional MTI (Weak)	23622248
MIRT047792	hsa-miR-30d-5p	Homo sapiens	TAB1	10454	Homo sapiens	CLASH	Functional MTI (Weak)	23622248
MIRT048189	hsa-miR-196a-5p	Homo sapiens	TAB2	23118	Homo sapiens	CLASH	Functional MTI (Weak)	23622248
MIRT051388	hsa-let-7f-5p	Homo sapiens	TAB2	23118	Homo sapiens	CLASH	Functional MTI (Weak)	23622248
MIRT052592	hsa-let-7a-5p	Homo sapiens	TAB2	23118	Homo sapiens	CLASH	Functional MTI (Weak)	23622248
MIRT052996	hsa-miR-142-3p	Homo sapiens	TAB2	23118	Homo sapiens	Luciferase reporter assay//Western blot	Functional MTI	22493297
MIRT052996	hsa-miR-142-3p	Homo sapiens	TAB2	23118	Homo sapiens	HITS-CLIP	Functional MTI (Weak)	22473208
MIRT054555	hsa-miR-26b-5p	Homo sapiens	TAB1	10454	Homo sapiens	Immunofluorescence//Luciferase reporter assay//qRT-PCR//Western blot	Functional MTI	24565101
MIRT449734	hsa-miR-1273e	Homo sapiens	TAB2	23118	Homo sapiens	PAR-CLIP	Functional MTI (Weak)	22100165
MIRT449735	hsa-miR-6086	Homo sapiens	TAB2	23118	Homo sapiens	PAR-CLIP	Functional MTI (Weak)	22100165
MIRT449736	hsa-miR-377-5p	Homo sapiens	TAB2	23118	Homo sapiens	PAR-CLIP	Functional MTI (Weak)	22100165
MIRT449737	hsa-miR-655-5p	Homo sapiens	TAB2	23118	Homo sapiens	PAR-CLIP	Functional MTI (Weak)	22100165
MIRT449738	hsa-miR-4708-5p	Homo sapiens	TAB2	23118	Homo sapiens	PAR-CLIP	Functional MTI (Weak)	22100165
MIRT449739	hsa-miR-4698	Homo sapiens	TAB2	23118	Homo sapiens	PAR-CLIP	Functional MTI (Weak)	22100165
MIRT449740	hsa-miR-8063	Homo sapiens	TAB2	23118	Homo sapiens	PAR-CLIP	Functional MTI (Weak)	22100165
MIRT449741	hsa-miR-583	Homo sapiens	TAB2	23118	Homo sapiens	PAR-CLIP	Functional MTI (Weak)	22100165
MIRT449742	hsa-miR-4311	Homo sapiens	TAB2	23118	Homo sapiens	PAR-CLIP	Functional MTI (Weak)	22100165
MIRT449743	hsa-miR-1276	Homo sapiens	TAB2	23118	Homo sapiens	PAR-CLIP	Functional MTI (Weak)	22100165
MIRT492101	hsa-miR-450a-1-3p	Homo sapiens	TAB2	23118	Homo sapiens	PAR-CLIP	Functional MTI (Weak)	23592263
MIRT492102	hsa-miR-6734-5p	Homo sapiens	TAB2	23118	Homo sapiens	PAR-CLIP	Functional MTI (Weak)	23592263
MIRT492103	hsa-miR-222-5p	Homo sapiens	TAB2	23118	Homo sapiens	PAR-CLIP	Functional MTI (Weak)	23592263
MIRT492104	hsa-miR-6073	Homo sapiens	TAB2	23118	Homo sapiens	PAR-CLIP	Functional MTI (Weak)	23592263
MIRT492105	hsa-miR-5681b	Homo sapiens	TAB2	23118	Homo sapiens	PAR-CLIP	Functional MTI (Weak)	23592263
MIRT492106	hsa-miR-4471	Homo sapiens	TAB2	23118	Homo sapiens	PAR-CLIP	Functional MTI (Weak)	23592263
MIRT492107	hsa-miR-8059	Homo sapiens	TAB2	23118	Homo sapiens	PAR-CLIP	Functional MTI (Weak)	23592263
MIRT492108	hsa-miR-4668-5p	Homo sapiens	TAB2	23118	Homo sapiens	PAR-CLIP	Functional MTI (Weak)	23592263
MIRT492109	hsa-miR-1292-5p	Homo sapiens	TAB2	23118	Homo sapiens	PAR-CLIP	Functional MTI (Weak)	23592263
MIRT492110	hsa-miR-3148	Homo sapiens	TAB2	23118	Homo sapiens	PAR-CLIP	Functional MTI (Weak)	21572407
MIRT492110	hsa-miR-3148	Homo sapiens	TAB2	23118	Homo sapiens	PAR-CLIP	Functional MTI (Weak)	23592263
MIRT492111	hsa-miR-6738-5p	Homo sapiens	TAB2	23118	Homo sapiens	PAR-CLIP	Functional MTI (Weak)	23592263
MIRT492112	hsa-miR-5194	Homo sapiens	TAB2	23118	Homo sapiens	PAR-CLIP	Functional MTI (Weak)	23592263
MIRT492113	hsa-miR-1914-3p	Homo sapiens	TAB2	23118	Homo sapiens	PAR-CLIP	Functional MTI (Weak)	23592263
MIRT492114	hsa-miR-423-5p	Homo sapiens	TAB2	23118	Homo sapiens	PAR-CLIP	Functional MTI (Weak)	23592263
MIRT492115	hsa-miR-3184-5p	Homo sapiens	TAB2	23118	Homo sapiens	PAR-CLIP	Functional MTI (Weak)	23592263
MIRT492116	hsa-miR-936	Homo sapiens	TAB2	23118	Homo sapiens	PAR-CLIP	Functional MTI (Weak)	23592263
MIRT492117	hsa-miR-4678	Homo sapiens	TAB2	23118	Homo sapiens	PAR-CLIP	Functional MTI (Weak)	23592263
MIRT492118	hsa-miR-6783-5p	Homo sapiens	TAB2	23118	Homo sapiens	PAR-CLIP	Functional MTI (Weak)	23592263
MIRT492119	hsa-miR-548m	Homo sapiens	TAB2	23118	Homo sapiens	PAR-CLIP	Functional MTI (Weak)	23592263
MIRT492120	hsa-miR-199b-3p	Homo sapiens	TAB2	23118	Homo sapiens	PAR-CLIP	Functional MTI (Weak)	23592263
MIRT492121	hsa-miR-3129-5p	Homo sapiens	TAB2	23118	Homo sapiens	PAR-CLIP	Functional MTI (Weak)	23592263
MIRT492122	hsa-miR-199a-3p	Homo sapiens	TAB2	23118	Homo sapiens	PAR-CLIP	Functional MTI (Weak)	23592263
MIRT532640	hsa-miR-6836-3p	Homo sapiens	TAB1	10454	Homo sapiens	PAR-CLIP	Functional MTI (Weak)	22012620
MIRT532641	hsa-miR-4633-5p	Homo sapiens	TAB1	10454	Homo sapiens	PAR-CLIP	Functional MTI (Weak)	22012620
MIRT532642	hsa-miR-4693-5p	Homo sapiens	TAB1	10454	Homo sapiens	PAR-CLIP	Functional MTI (Weak)	22012620
MIRT532643	hsa-miR-4711-3p	Homo sapiens	TAB1	10454	Homo sapiens	PAR-CLIP	Functional MTI (Weak)	22012620
MIRT532644	hsa-miR-6829-3p	Homo sapiens	TAB1	10454	Homo sapiens	PAR-CLIP	Functional MTI (Weak)	22012620
MIRT532645	hsa-miR-6791-3p	Homo sapiens	TAB1	10454	Homo sapiens	PAR-CLIP	Functional MTI (Weak)	22012620
MIRT532646	hsa-miR-6778-3p	Homo sapiens	TAB1	10454	Homo sapiens	PAR-CLIP	Functional MTI (Weak)	22012620
MIRT532646	hsa-miR-6778-3p	Homo sapiens	TAB1	10454	Homo sapiens	HITS-CLIP	Functional MTI (Weak)	23824327
MIRT532647	hsa-miR-4726-3p	Homo sapiens	TAB1	10454	Homo sapiens	PAR-CLIP	Functional MTI (Weak)	22012620
MIRT532647	hsa-miR-4726-3p	Homo sapiens	TAB1	10454	Homo sapiens	HITS-CLIP	Functional MTI (Weak)	23824327
MIRT532648	hsa-miR-6764-5p	Homo sapiens	TAB1	10454	Homo sapiens	PAR-CLIP	Functional MTI (Weak)	22012620
MIRT532648	hsa-miR-6764-5p	Homo sapiens	TAB1	10454	Homo sapiens	HITS-CLIP	Functional MTI (Weak)	23824327
MIRT532649	hsa-miR-1915-3p	Homo sapiens	TAB1	10454	Homo sapiens	PAR-CLIP	Functional MTI (Weak)	22012620
MIRT532649	hsa-miR-1915-3p	Homo sapiens	TAB1	10454	Homo sapiens	HITS-CLIP	Functional MTI (Weak)	23824327
MIRT532650	hsa-miR-6840-3p	Homo sapiens	TAB1	10454	Homo sapiens	PAR-CLIP	Functional MTI (Weak)	22012620
MIRT532650	hsa-miR-6840-3p	Homo sapiens	TAB1	10454	Homo sapiens	HITS-CLIP	Functional MTI (Weak)	23824327
MIRT532651	hsa-miR-532-5p	Homo sapiens	TAB1	10454	Homo sapiens	PAR-CLIP	Functional MTI (Weak)	22012620
MIRT532652	hsa-miR-6841-5p	Homo sapiens	TAB1	10454	Homo sapiens	PAR-CLIP	Functional MTI (Weak)	22012620
MIRT532653	hsa-miR-892a	Homo sapiens	TAB1	10454	Homo sapiens	PAR-CLIP	Functional MTI (Weak)	22012620
MIRT532654	hsa-miR-4318	Homo sapiens	TAB1	10454	Homo sapiens	PAR-CLIP	Functional MTI (Weak)	22012620
MIRT544316	hsa-miR-651-3p	Homo sapiens	TAB2	23118	Homo sapiens	PAR-CLIP	Functional MTI (Weak)	21572407
MIRT544317	hsa-miR-7-2-3p	Homo sapiens	TAB2	23118	Homo sapiens	PAR-CLIP	Functional MTI (Weak)	21572407
MIRT544318	hsa-miR-7-1-3p	Homo sapiens	TAB2	23118	Homo sapiens	PAR-CLIP	Functional MTI (Weak)	21572407
MIRT544319	hsa-miR-5688	Homo sapiens	TAB2	23118	Homo sapiens	PAR-CLIP	Functional MTI (Weak)	21572407
MIRT544320	hsa-miR-495-3p	Homo sapiens	TAB2	23118	Homo sapiens	PAR-CLIP	Functional MTI (Weak)	21572407
MIRT621902	hsa-miR-6818-3p	Homo sapiens	TAB1	10454	Homo sapiens	HITS-CLIP	Functional MTI (Weak)	23824327
MIRT621903	hsa-miR-7150	Homo sapiens	TAB1	10454	Homo sapiens	HITS-CLIP	Functional MTI (Weak)	23824327
MIRT621904	hsa-miR-6873-3p	Homo sapiens	TAB1	10454	Homo sapiens	HITS-CLIP	Functional MTI (Weak)	23824327
MIRT621905	hsa-miR-593-3p	Homo sapiens	TAB1	10454	Homo sapiens	HITS-CLIP	Functional MTI (Weak)	23824327
MIRT621906	hsa-miR-6895-3p	Homo sapiens	TAB1	10454	Homo sapiens	HITS-CLIP	Functional MTI (Weak)	23824327
MIRT621907	hsa-miR-4736	Homo sapiens	TAB1	10454	Homo sapiens	HITS-CLIP	Functional MTI (Weak)	23824327
MIRT621908	hsa-miR-4763-3p	Homo sapiens	TAB1	10454	Homo sapiens	HITS-CLIP	Functional MTI (Weak)	23824327
MIRT621909	hsa-miR-1207-5p	Homo sapiens	TAB1	10454	Homo sapiens	HITS-CLIP	Functional MTI (Weak)	23824327
MIRT621910	hsa-miR-6817-3p	Homo sapiens	TAB1	10454	Homo sapiens	HITS-CLIP	Functional MTI (Weak)	23824327
MIRT621911	hsa-miR-7110-3p	Homo sapiens	TAB1	10454	Homo sapiens	HITS-CLIP	Functional MTI (Weak)	23824327
MIRT621912	hsa-miR-3615	Homo sapiens	TAB1	10454	Homo sapiens	HITS-CLIP	Functional MTI (Weak)	23824327
MIRT652858	hsa-miR-8057	Homo sapiens	TAB1	10454	Homo sapiens	HITS-CLIP	Functional MTI (Weak)	23824327
MIRT652859	hsa-miR-4279	Homo sapiens	TAB1	10454	Homo sapiens	HITS-CLIP	Functional MTI (Weak)	23824327
MIRT652860	hsa-miR-24-3p	Homo sapiens	TAB1	10454	Homo sapiens	HITS-CLIP	Functional MTI (Weak)	23824327
MIRT652861	hsa-miR-4284	Homo sapiens	TAB1	10454	Homo sapiens	HITS-CLIP	Functional MTI (Weak)	23824327
MIRT652862	hsa-miR-2276-3p	Homo sapiens	TAB1	10454	Homo sapiens	HITS-CLIP	Functional MTI (Weak)	23824327
MIRT652863	hsa-miR-26a-2-3p	Homo sapiens	TAB1	10454	Homo sapiens	HITS-CLIP	Functional MTI (Weak)	23824327
MIRT652864	hsa-miR-26a-1-3p	Homo sapiens	TAB1	10454	Homo sapiens	HITS-CLIP	Functional MTI (Weak)	23824327
MIRT652865	hsa-miR-1281	Homo sapiens	TAB1	10454	Homo sapiens	HITS-CLIP	Functional MTI (Weak)	23824327
MIRT652866	hsa-miR-4485-5p	Homo sapiens	TAB1	10454	Homo sapiens	HITS-CLIP	Functional MTI (Weak)	23824327
MIRT652867	hsa-miR-6890-3p	Homo sapiens	TAB1	10454	Homo sapiens	HITS-CLIP	Functional MTI (Weak)	23824327
MIRT652868	hsa-miR-6511b-3p	Homo sapiens	TAB1	10454	Homo sapiens	HITS-CLIP	Functional MTI (Weak)	23824327
MIRT652869	hsa-miR-6511a-3p	Homo sapiens	TAB1	10454	Homo sapiens	HITS-CLIP	Functional MTI (Weak)	23824327
MIRT652870	hsa-miR-935	Homo sapiens	TAB1	10454	Homo sapiens	HITS-CLIP	Functional MTI (Weak)	23824327
MIRT652871	hsa-miR-3680-5p	Homo sapiens	TAB1	10454	Homo sapiens	HITS-CLIP	Functional MTI (Weak)	23824327
MIRT652872	hsa-miR-4798-3p	Homo sapiens	TAB1	10454	Homo sapiens	HITS-CLIP	Functional MTI (Weak)	23824327
MIRT652873	hsa-miR-3692-3p	Homo sapiens	TAB1	10454	Homo sapiens	HITS-CLIP	Functional MTI (Weak)	23824327
MIRT652874	hsa-miR-6881-3p	Homo sapiens	TAB1	10454	Homo sapiens	HITS-CLIP	Functional MTI (Weak)	23824327
MIRT652875	hsa-miR-4436b-5p	Homo sapiens	TAB1	10454	Homo sapiens	HITS-CLIP	Functional MTI (Weak)	23824327
MIRT652876	hsa-miR-6509-3p	Homo sapiens	TAB1	10454	Homo sapiens	HITS-CLIP	Functional MTI (Weak)	23824327
MIRT652877	hsa-miR-1250-3p	Homo sapiens	TAB1	10454	Homo sapiens	HITS-CLIP	Functional MTI (Weak)	23824327
MIRT652878	hsa-miR-483-3p	Homo sapiens	TAB1	10454	Homo sapiens	HITS-CLIP	Functional MTI (Weak)	23824327

## Sheet: miRNA expression in PBMCs
http://guanlab.ccmb.med.umich.edu/mirmine/help.html								2015-07-01	miRmine v1.0 included expression data of 304 high-quality public miRNA-seq datasets.
Reads Per Million		1	2	3	4	5	6	7	8	9	10	11	12	13	14	15	16	17	18	19	20	21	22	23	24	25	26	27	28	29	30	31	32	33	34	35	36	37	38	39	40	41	42	43	44	45	46	47	48
miRNA ID	Average expression	DRX012360 (Blood)	DRX012361 (Blood)	DRX012362 (Blood)	DRX017214 (Blood)	DRX017215 (Blood)	DRX017216 (Blood)	DRX017217 (Blood)	DRX017218 (Blood)	DRX017219 (Blood)	DRX017220 (Blood)	DRX017221 (Blood)	DRX017222 (Blood)	DRX017223 (Blood)	DRX017224 (Blood)	DRX017225 (Blood)	DRX017226 (Blood)	DRX017227 (Blood)	DRX017228 (Blood)	DRX017229 (Blood)	DRX017230 (Blood)	DRX017231 (Blood)	SRX318164 (Blood)	SRX318180 (Blood)	SRX386679 (Blood)	SRX386680 (Blood)	SRX386681 (Blood)	SRX426123 (Blood)	SRX426124 (Blood)	SRX426125 (Blood)	SRX426475 (Blood)	SRX426478 (Blood)	SRX546009 (Blood)	SRX546010 (Blood)	SRX546011 (Blood)	SRX546012 (Blood)	SRX546013 (Blood)	SRX546014 (Blood)	SRX546015 (Blood)	SRX546016 (Blood)	SRX546017 (Blood)	SRX546018 (Blood)	SRX546019 (Blood)	SRX546020 (Blood)	SRX546021 (Blood)	SRX546022 (Blood)	SRX546023 (Blood)	SRX546024 (Blood)	SRX546025 (Blood)
hsa-miR-181a-5p	75184.3	73081.3	55016.9	57360.8	4106.1	4065.6	4329.7	4854.2	5534.3	5260.7	4769.4	5942.4	4391.1	4481.2	5182.9	5595.9	4962.7	6098.4	7187.7	8992	5625.9	5113.3	646.5	1213.5	3823.7	902.2	1088.7	43423.3	69485.4	62351.1	80436.8	75282.5	141206	139096	148500	149662	150539	151802	158207	148407	144454	145190	172853	191434	193813	188696	174855	189982	188773
hsa-miR-181a-5p	75175	73078.3	55013.7	57358	4106	4065.3	4328.2	4852.7	5532.7	5260	4768.2	5941.7	4389.9	4481	5182.5	5594.5	4962	6097.2	7187.7	8991.9	5625.2	5112.7	646.5	1213.6	3823.8	902.2	1088.7	43196.1	69485.2	62350.9	80434.5	75280.8	141194	139084	148482	149646	150529	151790	158201	148399	144443	145174	172833	191409	193801	188686	174842	189975	188769
hsa-miR-191-5p	71198.1	26827.1	34411.9	30495	346606	329233	144464	130333	135922	142376	126032	132081	132636	127828	136866	142517	147599	173064	129261	190839	136189	140542	27665.9	14355.8	16268.2	11914.3	11221.8	39527.7	32824.1	44226.1	29697	34175.5	40492.6	38770.2	36448.9	34653.1	33258.1	34892.6	34126.4	36408.9	39797.8	39122.6	19865.8	21141.2	24314.5	26676.1	28847.9	12746.4	16475.1
hsa-miR-30e-5p	63100.1	19462.7	21298.9	24420.1	114016	111425	222325	230710	225221	226066	234642	233514	242326	236231	182346	171620	178427	154046	172176	133152	161770	177245	108.1	312	1207.3	1219.9	1369.2	16466.3	14505.4	17680.4	11786.1	11364.2	22335.5	21206.9	22837.6	21670.4	20565.9	19852.9	19068.7	17624	24566.3	25655.4	22034.7	19173.7	17719.4	15719	11952.7	6632.8	8998.8
hsa-miR-92a-3p	45233.8	45459.1	40831.5	41376.1	52993.7	53151.9	86779	84415.4	84302.8	80333.9	93238.3	86445.9	84883.8	84489.3	72028.2	70530.5	72253.7	74761.3	73871.9	67964	72541.9	73743	565.2	888.5	7367	3628.8	5247.2	19245.9	23732.8	16674.6	19363.5	18976.4	51680.8	43007.3	48959.4	51422.2	53475.9	52167.7	50860.1	37906.5	42691.6	41628.4	30999.9	36208.8	44430.7	53935.2	63369.2	79799.5	73556.1
hsa-miR-21-5p	40199.1	15437.9	21242	20138	13625.1	16208.6	22873.4	28524.3	25670.5	23095.3	23144.6	26142.3	21476.3	26948.3	26915.8	28880.6	23578.3	20792.4	25444.7	23058.8	25397	27197.9	3870.2	9613.7	22303.4	17563.6	14264.7	123951	95322.8	111960	126089	120545	21703.8	24000.3	23261.2	23344.3	24674.4	22659.1	19936.3	22857	22446.1	23955	30538.9	28237.5	24046.9	25167.7	26768.2	22150.8	22905.9
hsa-miR-92a-3p	38158.2	34387.9	30436.7	30999.6	42085.4	42509.3	67769.3	67142.5	65254.1	63425.5	75793.6	67248.5	70014.5	67482.1	59204.9	59024.1	60652.8	63788.8	60357.9	58885.7	61068.2	62062.1	562.5	884	7319.1	3614	5218.1	15926.5	18631.8	13183.5	15550.9	15439	45722.7	38889	43746.7	46107	47824.6	46468.5	45830.1	34107.7	38150.9	37166.6	27878.3	32568.2	39506.4	47788.5	56777.5	71880	66286.9
hsa-miR-142-5p	36400.5	121290	133341	120289	22194.7	23309.7	13057.8	12863.5	15370.7	13714.3	13400.7	13077.6	12089.7	13624.1	23949.8	22195.4	23718.3	14562.9	22936.5	14860	21167.6	22425.1	2758.9	2565.6	6290.2	5550.3	2944.1	119892	118644	111497	75163.5	70646.9	42963	44228.3	39530	45933.6	39732	35817.6	40229.8	32756.5	55784.7	44419.4	21435.6	17086.6	22383.2	21078.3	17033.9	11173.5	14412.3
hsa-let-7f-5p	32367.6	19076.3	21539.6	20664.1	10491.7	11192.7	10515.4	10662.6	10714.8	11088.7	8295	11837.6	11552.9	11253.4	15502.1	16093.7	11693.8	12059.9	18496.2	14585	16070.7	16315.6	213196	151748	147851	159090	156782	18883.3	14664	13645.8	15876.1	14673	31871.9	29625.6	28487.1	27217.4	30685.6	32584.4	31399.9	33218.5	25911.1	25094.8	38290.7	32231.8	27666.9	25369.2	22820	18721.2	20531.2
hsa-let-7f-5p	31270.7	18716	20942.6	20126.6	10228.9	10902.7	9909.1	10022.3	9902.8	10401.1	7913.3	10985.1	11027.9	10654.7	14671.8	15370.2	11267.6	11635.1	17439.3	14143	15408.5	15667.5	211874	150858	141675	152353	150536	18193.5	14074.6	13064.4	15102.9	14034.1	31065.2	28993.2	27801.5	26492.8	29930.3	31786.4	30752.8	32548.6	25229.9	24444.3	37215.7	31219	26765.4	24484.5	21979.7	18055.1	19800.3
hsa-miR-146b-5p	22259.3	4221.2	4981.5	4090.9	14139.3	14567.2	5950.8	6341.8	10035.2	7294	3408.5	7895.1	3394.6	6889.7	5075.3	4712.9	5566.9	3928.7	6820	4478.6	5381.2	5017.8	1729.8	2923.5	4780.4	2159.2	3849.2	15516.6	18180	25305.4	12194.6	20750	307.3	231	238.3	216.1	257.5	345.8	313.4	470.6	198.5	225.3	371.8	364.1	267	254.9	267.6	103.4	164.9
hsa-let-7g-5p	19472.3	27638.6	28916.2	28958.3	4840.9	5079.4	4965.5	5125.3	4999.8	4888.6	3298.8	5374.5	4994.4	4802.6	6951.9	7563.9	4555.8	4980.6	8546.4	7819.4	7158.1	7092.6	21899.5	52023.7	111332	114430	136376	32782.6	26217.6	23933.4	22938.4	24503.2	17220.7	19627.1	17522.3	16840.2	17677.7	18244.6	17928.6	20064.5	16663	17350.5	22745.5	19058.1	16831.4	14013.1	11132.5	7818.8	9258.2
hsa-let-7a-5p	17497.9	15107.8	17796.6	18151.3	24698.8	26464.9	14523.1	15482.1	15255.2	15666.9	11547.3	16636.2	12172.7	15751.7	20014.4	21968.5	18658.3	22773.5	24394.4	26295.2	20309.9	22659.6	66814.3	70821.6	65436.7	69532	60484.1	9501.5	8392.8	9792.9	7643.3	9712.3	9747	10591	9176.6	9076.1	9532.4	10363	10070.6	12259.8	9272.6	9784.9	13227.7	11173.6	9350.6	7596.4	6076.7	4343.9	4750
hsa-let-7a-5p	17478.2	15056.4	17709	18066.7	24629.5	26399.6	14405	15301.3	15162.9	15505.6	11442.6	16452.9	11983.1	15602.7	19911.9	21843.8	18556.3	22696.6	24224.1	26233.3	20159.2	22554.2	66846.1	70861.6	66172.3	70348.2	61112.8	9482.9	8375.7	9777.1	7626.7	9695.3	9717.4	10553.9	9140.1	9050.1	9498.8	10323.7	10037.3	12224.6	9252.2	9749.4	13176.9	11131.1	9321.5	7573	6047.7	4324.6	4711
hsa-let-7a-5p	17435.5	15050.3	17690.2	18054.5	24617.2	26386.8	14357.3	15246.9	15085.6	15455	11407.3	16385.9	11975	15569.6	19853.2	21791.8	18531.6	22672.7	24157.9	26231.9	20132.6	22524.5	66802.2	70812.7	65184	69304.1	60259	9476.1	8358.3	9751.9	7609.4	9669.6	9741.1	10579.8	9151.6	9069.4	9525.4	10345.6	10079.8	12254.4	9277.7	9767.4	13227.3	11153	9333.9	7600	6063.1	4329.4	4724.9
hsa-miR-16-5p	13586.7	26646.1	26152.9	27523	10689.5	11269	17078.5	16342.6	16668.9	16862.3	16382.5	15510.9	16407.2	16590	23567.1	22818.9	24634.4	26380.8	21384.4	23957.8	21966.6	21855	922.5	378.8	1793.7	242.6	372.4	13052.3	17887.8	17406.6	18141.1	18934.2	12757.9	13564.4	12503.6	12378.2	11862.6	11563.1	12489.4	16175.5	13013.6	15389.8	6522.2	6144.8	8167.8	9430.7	8998.1	5132.5	6793
hsa-miR-16-5p	13583.2	26635.2	26157.2	27514.3	10681.8	11259.2	17067.6	16321.7	16678.5	16841.5	16359.3	15497	16372.1	16571.5	23565.5	22806.1	24625.5	26380.6	21385	23947.5	21958.1	21844.2	922.3	378.5	1794.1	243.1	370	13048.1	17898.7	17438.1	18148.3	18927.9	12750.1	13560.2	12493.7	12374.3	11859.2	11561.6	12482.6	16165.6	13009	15378.4	6526.6	6147	8167.6	9429.3	8993.4	5133.9	6788.2
hsa-miR-378a-3p	11598	2059.8	3240.1	2668.3	5981.4	6600.2	11007.6	11813.4	12047.8	11214	12749.7	12366.2	10912.2	10408	15511.5	16169.6	15847.2	20050.5	15710.5	17870.5	15645.3	13309.3	290	281.9	1895	2340.5	1616.4	10363.9	7918.8	9573.8	9814.2	9548.2	13405.9	14991.4	14022.6	13259.2	14163.6	14294.8	13821.2	16523.1	13420.7	13942.5	16696.8	16660.5	14578.6	13977.6	17232.4	17621.4	15478.7
hsa-miR-148a-3p	11249.2	1303.8	3160.3	2869.2	21155.8	23650	18785.6	22283.3	18854.1	20153.4	23949.8	17037.1	21948.2	18076.1	23203.1	25518.1	24317.5	23365.4	20272	26262.1	27253.2	20610.6	91.8	86.4	96.5	80	91.5	9061.3	6768.7	7352.1	5635.8	5232.5	7520	7024.3	6956.6	6259.7	6695.6	6272	6514.3	7878	7648.4	6783.5	7323.9	7048.4	6364.8	7123.5	11179.3	11962.9	11459.8
hsa-miR-182-5p	11170	607.6	590.9	401.9	18834.1	18433.7	25828.5	24545.5	25430.6	28506.6	23617	26482	29370.6	25192.1	18186.4	17482.3	17368.2	14396.6	22131.7	12781.4	22311	18957.3	5.4	4.2	7.4	5.6	5.9	201.5	146.7	136.9	131.9	120.1	5823	4497.6	5476.3	4728.2	5462.1	5198.6	4578.1	4525.3	4775.3	5169.7	6695.7	6889.2	5922.9	6792.8	10342.1	11288.1	9574.4
hsa-miR-30d-5p	11079	19661.2	19271.4	20314	7450.2	7486.8	10862.3	10302.2	10441	10515.4	11351.9	10461.5	10812.1	10852.4	8610.1	8117.9	9410.8	11182.1	8108.5	11640.6	9207.6	8264.5	1740.1	2757.1	5482.7	5962.5	6646.5	12355.2	11263.1	12999.4	9601.3	12247.8	13508.1	11258.7	13395.2	12696.6	12233.9	12872.1	11790.8	9046.4	13192.9	12941.1	14680.8	15483.1	14311.5	14097.3	13341.1	8613.9	10770.4
hsa-miR-25-3p	10862.1	9967.1	9433.7	10021.6	5169.6	5226.5	7067.7	8592.5	7757.3	7496.9	7555.8	7093.9	7393.6	7380.1	9314.8	10581.8	9855.7	9924.9	8730	8814.7	9995.2	9749.3	2559.4	4107.3	3543.4	865.7	797.5	9386.6	9025.7	7980.8	9160.8	8613.7	15935.9	16347.8	13903.2	15310.9	15378.8	15301.4	15332.2	17709.4	15991.5	15243.1	16332.9	15207.8	13155.3	14880.2	21482	24329.9	24208.3
hsa-let-7i-5p	10758.7	10674.4	10236	9996.5	3604.3	3842.7	3410.8	3122.3	3462.6	3506.6	3511.1	3706.2	3847.2	3462.4	4695.7	4719.6	5222.6	5307.9	4960.8	6017.7	5629.8	5113.9	3932.7	10297.6	15457.5	11073.3	10332.7	14357.2	10083.8	8747.3	11435.2	9299.3	14131.2	14430.2	13537.2	14664.3	15722.8	14877.6	14778.6	17565.8	13692.6	11923.5	15138.6	13196.6	14215	13744.7	13365.5	16054.1	16474.1
hsa-miR-146a-5p	10619.2	8956.2	9350.3	8075.1	40.1	284.1	5.9	3.4	5.8	5.8	8.3	6	4.7	5.5	6.8	5.2	6.2	6.2	7.7	7.8	6.1	5.4	132.2	199.2	1437.1	711.8	927.9	11291.3	9892.8	12220.3	6037.9	9509.8	0.7	0.3	0.5	0.4	0.1	0.1	0.6	0.8	0.2	0.2	0.3	0.1	0.2	0.1	0.2	0	0.5
hsa-miR-181b-5p	10428.9	1226.2	894.9	952.8	680.1	640.2	934.3	1039.8	1002	1097	1123.7	1043.4	1056.4	931.5	1002.7	1084	1124.7	1200	1173.2	1575.1	1367.7	1004.7	375.6	672.7	1286.2	278.8	361.6	1442.2	2286.2	2070	3404.4	2807.1	23932.7	23828.5	25320.8	24524.6	24135.1	24135.1	23590.5	19950.9	24077.3	22887.4	17519	22145	24856.3	28183.6	31221.5	38793.8	34154.7
hsa-miR-98-5p	10131.1	915.5	1977.4	1648.9	6046.2	6778.5	2513.8	2454.2	2386	2623.3	2268.2	2525.3	2695.6	2619.7	3590.1	3561.1	3586.6	3441.3	3991.3	4837.9	4361.4	3922.2	168.9	225.8	921.4	344.8	307.9	1749.5	1365.9	1639.7	1476.3	1732.6	18810.8	20808.3	17184.5	15769.5	16537.8	18382.8	18654.9	26417.3	17815.2	18468.8	24488.5	20340.5	15802.3	13960.2	13105.3	9766.5	10558
hsa-miR-26a-5p	10109	43779.2	48608.3	52121.3	4822.3	4615.7	4497.4	4023.7	5075.4	4506.5	4256.1	4562	3445	4783.7	5687.2	4942.5	5730.6	5885.1	6483.6	4951.6	5081.8	5517.5	3181.8	2401.6	2281.5	796.3	1178.5	28688	36577.2	36891.1	31812	36633.1	5449.7	4829.4	5138.5	4974.1	4799.4	4932.7	4903	4429	5721.5	6379.5	4378.3	4042.9	4320	3684.5	2629.5	1914.9	2320.4
hsa-miR-26a-5p	10099.1	43768.7	48594.9	52107.4	4811.6	4607.9	4478.4	4006	5048.9	4490.5	4237.4	4543	3429.5	4757.6	5669.9	4929.7	5717.3	5875.2	6471	4947.2	5067.8	5499.6	3176.5	2394.7	2247.7	769.8	1140.6	28782	36553.9	36862.5	31785.8	36607	5445.6	4827.6	5135	4970.6	4795.3	4929.7	4900.6	4427.9	5719.6	6376.9	4375.6	4040.6	4318.7	3680.6	2628.2	1913.2	2317.5
hsa-miR-181b-5p	9404.16	1203.5	875.7	922.6	619.8	581.8	806.7	902.8	851.5	967	988.6	918.1	940.2	803.8	926.9	995.3	1024.7	1072.9	1097.6	1434.4	1241.8	916.6	372.2	665.3	942.2	179	239.1	1312	2166.1	1934.8	3247.5	2655.5	21682.3	21320.4	22778.7	21900.1	21883.9	21930.3	21573.2	18129.7	21265.1	20488.8	15690.8	19975.3	22623.6	25515.2	28042.4	35700.9	31239.4
hsa-miR-155-5p	9386.04	3199.4	3359.2	3698.8	3061.1	3359.8	3776.2	4308.3	5117.3	4337.2	5533.4	5196	4902.8	4615.8	3616.9	3979.3	4398.6	5209.3	4464.1	4754.9	4808.7	4107.1	64.9	123.8	273.5	38.7	63.1	5317.1	3766	4341.3	4983.4	4550.1	2753.6	2473.3	2466.2	2502.3	2407.6	2485.1	2427.3	2711.9	2468.8	2127.6	1488.3	1430.5	1792.4	2187	2405.4	2691.3	3010.3
hsa-miR-30c-5p	8362.21	1587.8	1796.6	1862.1	13599.6	13683.7	33347.6	34000.2	29467.1	31008.5	34076.1	30114	34253.5	33567.4	24237.1	22919.3	23682.2	22964.1	21280	18418.4	23761.3	22586	40.9	22.7	188.3	135.8	136.9	1499.8	1237.7	1392.5	1325.4	1430.8	2562.5	2343.1	3008.3	2781.4	2437.1	2312.8	2281.4	1776.8	2849.3	2640.4	2044.8	1619.2	1942.8	1884.5	1670.9	1475.4	1595.9
hsa-miR-30c-5p	8358.11	1586.6	1796.6	1862.1	13595.9	13680.7	33329.9	33980.1	29450	30992.5	34062.3	30098.4	34237.1	33553.1	24229.1	22910.4	23672.7	22959.4	21273.2	18412.7	23748.9	22576.4	40.9	22.8	188	135.5	136.7	1498.7	1237.5	1390.8	1324.9	1430.8	2559.6	2342.3	3007.5	2780.8	2436.7	2309.4	2280.7	1774.7	2847.1	2638.3	2042.6	1619.4	1942.7	1884.2	1670	1475.1	1595.3
hsa-miR-22-3p	8171.84	3480.6	5175.8	3501.5	1958.3	2187.8	3706.5	3883.2	4473.8	3611.5	3592.7	4371.2	3230.9	3334	5493	5372.7	5014.5	4949.1	6197.3	5100	4940.8	4475.2	152	100.6	258.7	58.9	86.6	38863	31335.8	31076.3	42070.8	41093.8	6076.7	6504.6	6699.6	7015.2	6535.6	5929.5	6027.5	5156.3	6308.6	7380	4634.1	4537.9	6258.9	5522.8	3584.1	2417.3	2757.9
hsa-miR-186-5p	7339.72	17159.3	19385.8	19118.5	11797.6	11137.3	10497.3	10030.2	10613.7	11095.6	11421.6	10209	10910.8	10485.5	11322.4	11037.9	11505.7	9645.9	11439.2	13667.9	12361.1	11226.4	55.5	98.7	575.3	357.9	536.7	18781.9	14734.3	15447.3	12892.9	12041.4	5823.8	3538.9	5240.1	4633.8	3789.4	4055.1	3196.1	2058.3	5981.9	3957.7	3032.3	3427.8	3586.7	3198.2	2638.2	2064.1	2339.8
hsa-miR-93-5p	7229.67	1781	1696.8	1699.8	2301.1	2403.6	3763.1	3864.6	4146.7	3812.4	4058.8	3651.1	3965.1	3846.9	4310.4	4141	4584.9	5179.5	4126.2	5333.4	4813.7	4384.3	343.2	283	882.1	242.9	381.4	2050.2	1938.9	2133.8	2108.6	2003.2	12951.6	17969.9	14185.4	14095.1	14060	13262.9	13942.4	16138.1	14687.6	16496.9	12042	11045.1	11478.7	12558.9	12736.2	11559.7	12006.5
hsa-miR-150-5p	6227.28	23055.6	24807	26362.7	0.1	0.1	0.2	0	0.5	0	0	0	0	0.2	0.2	0.1	0.1	0.2	0.8	0.3	0.8	0.3	686.3	268.2	1403.4	837	1346.5	52424.5	53830.9	41779.4	75130.5	68012.6	223.4	206	259.3	272.4	231.2	227	222.5	146.8	214.3	239	125.3	116.6	170.4	189.6	191.8	431.3	336.2
hsa-let-7b-5p	6166.2	1713.1	1657.5	1594.5	6527.2	6496.7	5543.2	5812.8	6338.1	6320.8	4829.2	7126.3	4829.3	5903.1	7494.3	7603.8	7726.9	8632.1	8973.6	9825.1	9954.6	8584.5	53764.2	87799.3	35231.2	31037.9	29624.2	2037.6	2044.9	2347.5	1938.9	2242.9	5.4	6.1	20.4	7.4	3.8	5.9	5.8	15.5	8.6	5.8	10.2	9	5.9	7	4.5	6	4.3
hsa-miR-26b-5p	5656.57	15210.7	16073.9	18414.3	3682.5	3674.6	4406.6	4183.9	4428.1	4062.2	4153.2	4023.5	3999.6	4266.4	6226.8	5629.3	6124.8	4217.4	6340.8	4081	6063.7	5401.6	7840.7	5307.4	9923.5	4394.8	5077.3	17900	16672.1	15727.1	15905.1	16244.4	3790.4	3849.4	3540.4	3082.7	2999	3130.3	3228.7	3759.5	3418.9	3881.5	2782.3	2310.6	2453.8	2985.8	3217	2199.6	2567.6
hsa-miR-181a-3p	5384.97	772.7	490.5	701.8	13.5	10.6	11.9	9	12.7	7.2	11.4	25.7	25.2	8.2	23.4	13.1	12.3	38.9	28.2	33.8	29.7	12.3	12	23.5	87.3	48.7	58.1	950.7	600.3	618.5	861	755	10732.2	12585.9	11506.9	11818	13658.4	11249	10049.5	10065.4	11082.4	13258.2	20319.1	18065.9	11445.9	11651.8	15324.8	11759.5	11130.2
hsa-miR-103a-3p	5120.93	1835.7	1756.5	1807.1	1015.4	1091.3	1670.1	1448.8	1497.4	1512.4	1286.6	1437.6	1671.4	1589.6	1590.6	1766.8	1653.8	1558	1561.9	1936.4	1989.3	1853.7	11151.7	14373.2	22845.8	22024.7	21387.6	3609.7	3011.9	3299.7	3852.9	3706.4	5647.2	7163.4	6190.6	6147.5	6160.5	6000.2	6234.5	8784.3	6079.3	6363.1	5040.1	5205.1	5922.6	6824.7	7474.8	7221.3	7273.8
hsa-miR-103a-3p	5100.93	1815.9	1734.5	1784.6	998.3	1075.9	1636.4	1415.2	1475.8	1482.8	1255.8	1406.4	1619.7	1557.3	1570.7	1745.5	1640.6	1539.9	1541.5	1923.3	1963.5	1834	11154.7	14374.8	22839.7	22018.1	21380.6	3579.9	2991.9	3276.8	3831.8	3684.7	5623.6	7136.2	6169.3	6131	6147.2	5983	6221.8	8759	6051.5	6332.5	5017.1	5184.8	5908.8	6813.8	7462.3	7219.2	7269.8
hsa-miR-142-3p	4732.25	3573.3	4465.2	5396.1	1945.9	2067	4074.8	4080.5	4228.7	4352.5	3944.8	3876.1	3614.6	4001.7	4263.4	4250.8	4522.6	2311.6	3620.8	2225.8	4298.2	4211.9	38.7	94.7	381.1	171.1	342.6	6552.5	7763	7792.7	5548.4	3664.8	8105.9	8515.5	8029.7	7635.8	6204.1	6107.4	5651.4	6765.5	9088.8	8937.5	5033.5	4532.6	4425	4676	4452.3	4443.3	4588.4
hsa-miR-140-3p	4732.23	6016.9	6526.8	7183.3	1235.3	1270.1	1652	1729.8	1789.7	1635.7	1565.4	1774.8	1490.9	1914	1669.2	1822.3	1892.5	1860.8	1773.1	1810.4	1957.3	2045.9	36578.3	43528.1	27844.3	33974.8	36905.2	4967.1	4749.6	4773.7	4723.4	5029	1403.5	1662	1425.4	1579.9	1581.8	1394	1525.1	1578.3	1521.1	1509.5	1309.6	1292.2	1519.4	1649.4	2147.8	2355.3	2348.9
hsa-miR-20a-5p	4635.66	1532.2	1515.4	2082.4	4379.5	4687.6	6944.1	6882.2	7082.6	6864.4	7255.1	6162.2	5821.9	6379.1	6523.7	7338.1	7504	8515.1	6423.3	6662	8126.3	7002.2	37.5	42.1	165.6	26.8	66.8	700.6	692.1	984	601.3	740.1	6379.3	9135.1	6857.8	5777.7	5512.9	5441.1	5459.7	7714.9	6785.8	8765.3	7832	6035.8	4135.2	4613.3	5868.6	2713.5	3122.7
hsa-miR-30e-3p	4461.03	1357.7	1193	1374.7	9545.7	9408.9	11975.5	12702.2	13027.6	12070.2	12252.8	12296.2	10276.9	11084.4	17441.6	18316.2	16522.1	14960.6	17631.2	9762.1	15781.5	16808.2	59.3	111.5	1102.6	713.7	447	507.7	957	944.4	1121.1	1117.7	1117.9	972.6	979	1078.4	1044.4	999.5	871.6	1034.8	1054.1	1101.8	1058.9	1037.3	1115.9	1217.4	1522.5	1256.5	1209.5
hsa-miR-423-3p	4407.99	2379.2	2391.6	1645	2770.5	2702	8204.5	7957	6626.7	8036.8	8915.8	6614.6	7968.5	7038.9	5706.8	5668.2	5439.5	4549.1	5846.2	5107.9	6177.3	5059.2	196.7	407	822.6	1189.3	1061.7	1930.1	1691.6	1386.5	1780.2	1946.7	5994	3744.7	5208.1	5485.7	5778.9	6304	5559	2975.2	4847.1	3617	4926.4	5563.9	6069	4498.5	2849.4	3405.1	3495.3
hsa-miR-222-3p	4237.26	1100.6	1043.3	1053.3	2621	3044.7	7068.4	4538	4368.9	5593.7	6833.9	4812.8	8487.3	6734.1	4558.7	3781.8	4288.5	4402.9	4016.5	4201	5512.3	4671.7	4117.6	4856.4	2695.9	2402.9	2248.4	854.8	861	842.5	755	730.9	1893.4	1611.7	1651.1	1642.7	1793.3	2289.2	1804	1895	1936	1427.1	1527.8	1483.1	1421	1443	1913.1	1534.4	1645.7
hsa-miR-28-3p	4007.77	19071.8	15030.9	13840.1	3801.7	3930.5	4149.8	4127.4	4077.9	4226.1	3699.1	4319.7	2869.7	4267.5	5255.8	5311.5	4898	5229.8	5694.5	4871.3	4942.7	5012.9	91.7	141.5	222.9	231.5	229.1	10734.4	7391.9	6639	8328.8	6960.6	3082.2	2053.1	2204.3	2338.8	3036.8	2767	2683.5	2502.4	2718.2	2000.2	2069.4	2435.4	2284.8	2600.3	4067.7	5108.7	4837.5
hsa-miR-92b-3p	4001.77	193	200	173.1	8294.9	8868.1	4744.6	4068.6	3746.4	3589.7	4466.4	2951.9	3832.4	3571.5	4897	5433.4	4648.8	7044.5	4370	8302.2	5396.9	4402.4	31.1	33.8	70.6	52.9	63.9	438	400.2	308.5	324.4	409.5	7576.3	6088.2	6585	6526.3	7153.9	7988.1	7376.9	8250.2	7294.9	6291.6	5590.7	5486.5	6189.5	6161.5	5815.4	3600.2	4189.4
hsa-miR-29a-3p	3843.65	13652.9	13972.9	15917.2	371.8	402	531.2	473.5	544.8	500	602.2	471	527.8	622.6	680.6	636.6	748.8	700.5	619	596.9	645.5	853.3	4995.1	7137.9	16396.6	12450.3	21092.8	7546.9	10864.5	11291	7071.7	8010.3	675.7	755.6	711.6	879.4	865.6	660.5	685	636.3	832.8	859.1	627.4	490	608.3	469.7	303.7	190.3	239.1
hsa-miR-320a	3656.35	867.2	940.3	982	756.3	761.4	903.8	885	1021.7	1114	910.1	1141.6	1165.1	1007.6	1003.2	1011.4	1118.8	1095.7	1086.4	1266.4	1280.6	1254.9	20653.5	56395.4	12066.7	25258.2	18758	1267.8	1174.5	1385.4	962.2	972.5	2178	2058.7	2290.5	2055.7	2246	2342.6	2194.2	2083	2159.8	2261.5	2237.7	2192.6	2471.3	2111	1876	2176	1713.6
hsa-miR-221-3p	3543.47	4440.2	3955.6	4021.6	2151.7	2452.8	2037.2	1624.8	1938.2	1893.7	2073.2	1998.7	2678.7	2143.7	2071.5	1913.9	2388	1872.8	2042.1	1763.3	2674.8	2394.8	4613	7721.3	7661.4	10433.3	11330.8	2526.9	2047.4	2077.1	2054.4	1878.5	1278.7	1577.8	1273.6	1296	1333.6	1308.1	1330.9	1443.9	1405	1347.4	1622.6	1269.7	1027.9	978.8	859.4	533.3	682.4
hsa-miR-192-5p	3482.33	6183	7020.5	8007.6	528.8	561.2	303.4	279	325.2	296.9	284	272.3	220.1	316.4	489.3	438	485.5	623.5	459.6	528.7	522.3	545.9	980.3	1599.4	2435.6	2551.7	4943.5	10165.8	8177.8	8264.4	6872.4	6783.8	4561.4	4943.4	4286.8	4657.8	4814	4775.3	4863.6	5715.7	4360	4651.1	5940.5	5212.1	5297.6	5097.4	5790.8	4163.1	4609.6
hsa-miR-769-5p	3284.59	539	663.4	631.6	706.2	758.9	1010.2	937.1	878.2	1043.8	834.3	807.5	1004.5	1042.7	1116.2	1173.5	1353.9	1367.7	994.1	1432.4	1661.4	1390.5	1.6	1.6	16.5	16.1	15.6	758.5	705.4	766.6	754.9	822.1	5481.7	6689.6	6718.3	5544.6	5773.3	5667.7	6015.9	5493	5703.2	6643.8	9739.6	9077	7432.4	7391.7	9830.2	10332.9	9820.3
hsa-miR-27b-3p	3278.13	7052.5	11759.7	6930.4	3838.1	3934.5	1528.6	1540.2	1530.9	1565.4	1632.5	1574.2	1481.8	1611.1	3210.5	3178.5	3231.6	2906	3476.4	3411.4	3319.3	3280.7	19.8	33.5	117.5	70.5	79.7	6110.5	5274.9	4836.9	5870	6100.7	3351.6	3658.1	3343.7	3291.9	3252.8	3330.6	3296.1	3726.4	3675.4	3786.1	2684.6	2536	2923.6	2869.6	2462.2	1620	1925.8
hsa-let-7d-5p	3195.94	1262.2	1396.5	1302.2	1430.4	1498.4	1227.3	1249.8	1193.5	1278.7	1299	1203.6	1308.1	1218.2	1655.7	1851.9	1716.6	2471.1	1783.8	2941.2	2067.7	1794.1	22466.9	13622.8	6765.8	11368.9	10671	921.5	797.9	813.8	806.6	885	2288	2970.4	2614	2544.4	2395.9	2558.2	2523.3	2766.1	2412.3	3305.7	4728.1	4081.9	3201.4	2260.1	1834.7	1264.5	1306.9
hsa-miR-17-5p	3083.46	541.8	543.3	740.3	2994.3	2962.1	4419.8	4329.1	4481.6	4504.5	4521.9	3791.6	4340.9	4387	4362.1	4259.4	4624.5	5527.6	3445.2	5480.5	4998	4708.3	87.2	77.4	481.9	61.5	113.2	465.7	451.3	623.2	404.7	421.4	4317.2	5980.2	4565.6	4307.3	4016.4	3806.6	4019.3	5554.9	5004.8	5866.5	3894.1	3027.7	2701.3	2892.3	3336.5	1790.4	1883.8
hsa-miR-342-3p	2890.15	5399.9	5089.3	5519.3	1211.1	1120.2	690.1	711.7	733.1	777.5	653.9	745.5	783.3	721.4	501.9	529.3	607.1	616.6	527	580.3	564.2	529.9	3180.6	1565.8	2094.9	648.3	1321.6	4258.8	5217.4	6325.6	4318.5	5686.1	3476.6	4170.7	4189.7	3799.9	3041.6	3195.2	3029.8	3174.3	3765.2	3794.3	2845.4	2188	2293.4	2243	2384.3	4077.1	3406.3
hsa-miR-423-5p	2699.96	2603.8	2540.3	2093.3	1021.8	1004.7	2661.6	2389.9	2156	2428.3	2855.5	2359	2485.6	2312.7	2283.9	2249.3	1993	1662.7	2439	2014.8	2421.7	2092.1	20259.7	25124.8	8118	12624.2	10006.3	665.2	941.6	1122	795.4	891.6	366.2	267.9	362.8	307.1	345.6	331	282.2	222.2	341.7	414.2	439.9	516.8	484.2	368.5	326.2	239	213.9
hsa-miR-21-3p	2665.61	577.1	818.1	788.4	1147.5	1356.4	867.7	1263.5	1115.8	988.5	931	969.6	813.2	1250.3	1713.2	2262.2	1665.5	2029.9	1886.6	2294.9	2119.3	2293.2	2.5	8.5	26.1	19.5	13.1	4715.3	4123.2	2567.8	4522.9	4644.3	2348	3308	2333	2781.8	2344.6	2683.9	2577.9	3066.2	2353.8	2417.2	2376	2530	2509.5	2616.6	3691	3373.9	3178.9
hsa-miR-425-5p	2426.68	937.4	920.4	801.8	3361.5	3206.2	5826.3	5535.9	5415.4	5903.5	5482.6	5534	5956.3	5148.7	4593.7	4510.8	4579	4449.9	4493.1	5839.6	4510.6	4426	41.9	34.5	293.2	63.9	68.5	1479.3	1355.8	1217.1	1297.1	1280.5	1262.8	1312.6	1250.5	1294.1	1168.2	1139.7	1213	1508.6	1417.7	1386.7	780	638.9	821.2	946.2	875.8	625.8	820.9
hsa-miR-101-3p	2196.5	7083.4	7215.2	9394.2	804.8	819.1	901.5	942.3	1028.6	948.9	905.6	938.3	909.9	1077.5	1459.6	1453	1407.7	1026.4	1475	929.9	1542.8	1618.8	1495	2856	2890.8	2529.4	3059.2	6659.6	6270.7	5737.4	6596.9	5232.4	1458.4	1991.1	1734.4	1842.7	1853.2	1608.9	1672	1657	1636.2	1962.1	2664.4	2361	1942.3	1959.5	2394.4	2504.2	2411.8
hsa-miR-128-3p	2183.12	213.5	210	185.2	188.1	183.4	296.3	221.6	229.2	263.4	309.3	237.2	327.1	255.1	365.1	311.5	357.4	241.6	358.6	272.3	436.8	347.4	737.3	678.9	707.2	1102.8	1240.1	253	202.3	161.3	177.3	136.1	6707.1	5712.5	6232.9	5555.3	5254	5614.9	5372.1	5638.1	6516	6085	3999.6	3476.6	3759.1	3370	2783.3	2733.9	3087.1
hsa-miR-101-3p	2100.74	6572.7	6663.6	8676.5	764.5	774.9	813.3	846.4	955.6	846.7	804.2	840.2	824.5	970.7	1354.4	1361.4	1313.8	956.5	1379.2	880.6	1448.9	1522.8	1494.6	2855.3	2862.2	2502	3020.8	6331.4	5926.8	5400.9	6250.2	4928.8	1422.9	1946.8	1696.7	1804.9	1818.4	1579.3	1640.9	1616.8	1599.8	1917	2600.6	2303.5	1902.7	1915.6	2344.4	2466.7	2375.6
hsa-miR-99b-5p	1957.65	219	199.1	153.7	1779.2	1905.9	929.6	975.5	1155.5	954	1043.2	995	493.2	902.4	1360.8	1214.7	1611.3	1103.7	1265	1212.5	1136.9	1056.2	86.3	137.1	100.4	197.6	164.3	680.5	895.3	1038.6	386.7	567.6	2179.1	2222.7	1882.9	1665.9	1361.9	1393.8	644.7	1241.8	1861	1948	1227.7	853.8	1098	783.9	795	271.2	398.7
hsa-miR-301a-3p	1948.67	83.3	122.5	100.6	784.8	744.6	1041.2	932.3	1224.9	1043.5	896.6	1089.7	728.6	1054.2	1116.8	1057.4	1087.1	764.4	1089.8	1289.6	955.9	1144.1	2.3	1.8	6.1	1.9	4.6	363.8	309.8	392.4	391.9	280.1	4147.2	4095.1	4175.1	4403.3	3897.6	3817.7	3307.2	3650.6	4854.8	5063.2	3167.8	3061.8	3040.9	3071.7	2912.8	2382.8	2793.8
hsa-miR-107	1916.67	420.7	337.7	365.7	349.8	357.2	402.6	302.4	374.4	361.9	356.8	369	385.4	356.3	510.2	455.4	523.9	463.4	510.7	577.8	573.5	521.8	10215.9	12988.3	19968.2	20382.6	19794.9	521.4	430.9	380.9	580.9	520.6	776.5	1039.8	920.5	964.9	925.2	854.7	929.1	1136	930.5	964.3	1209	1250.9	1112.8	1052.7	1050.1	1155.2	1166.6
hsa-miR-15a-5p	1846.36	6569.3	5911.2	6405	1239	1316.1	1342	1373.8	1492.3	1468.4	1294.2	1359.8	1191.8	1408.3	2602.7	2502.7	2679.5	2017.1	2431.1	1929.8	2406	2460.2	155	88.3	946	70.1	114.2	2143.9	2211.3	2078.4	2571.5	2196.4	1817.9	2444.4	2206.4	2357.7	2037.1	1831.2	2023.6	2315.7	2295	2579.6	1749.3	1536.4	1680.5	1395.2	1040.3	944	1090.1
hsa-miR-27a-3p	1735.69	987.4	1563.6	1580.7	2537.1	2546.1	973.7	960.4	1112.2	1008.9	823.6	1031.8	763.6	1054.5	2351.6	2244.2	2371.8	1432.1	2620.5	1365.7	2142.1	2145.6	96.9	127.8	788.4	760.1	694.8	6263.6	7698.8	7847.8	6947.3	7848.6	81.5	93.5	105.1	89.6	84.6	82.1	86.5	94	100.5	107.6	67	63	70.9	58.7	50	33.1	51
hsa-miR-148b-3p	1623.67	1149.8	1297.7	1424.9	2889	3337.3	1985.3	1764	1936.4	1973	1758.9	1655.7	1824.4	1845.7	1608.7	1662.7	1825.6	1630	1519.9	1679.5	2012	1539.8	96.1	104.9	176.9	186.9	181.1	1812.7	1413.1	2006.1	1314.1	1461.3	1816.1	2043.8	2015.6	1712.2	1674.7	1562.5	1534	1965.8	2016.8	1845.1	1607.5	1415.9	1532.8	1608.5	1764.8	1124	1297.1
hsa-miR-1307-5p	1613.51	166.2	244.7	221.6	1118.2	1304.1	1603.1	1332.5	1402.1	1466.1	1896.9	1263.6	1696.5	1507.5	2182.4	2268	2481.5	1007.6	2086.6	1374.8	2609	2224.9	71.8	23.5	240.9	163.8	197.2	570	1109.9	1151.9	943.4	880.7	2530.5	3189.2	2484.1	3195	2427.3	2521.3	2343.3	2603.2	2990.8	2824.5	2004.7	1576.5	2227.9	1761.7	1250.7	876	1249.3
hsa-miR-484	1613.44	623.8	686.4	622.7	4079.3	3808.8	1486.6	1474.1	1358	1635.3	1580	1343.3	1840.7	1471.9	1401.9	1338.8	1422.3	1428.6	1299.9	1629.1	1471.6	1379	18.9	11.8	38.7	34.5	33.6	544.2	774.3	678	558.5	628.5	2817.2	2746.5	2659	2604.9	2417.3	2624	2699.8	2906.2	3005.6	2766	2012.9	1684.8	1804.8	1449.9	1152.8	1228.8	1335.7
hsa-miR-185-5p	1538.81	46.7	53.9	52.5	80.7	91.2	84.1	88.3	118.1	96.1	86.9	111.2	92.2	100.4	108.5	115.3	134	105.4	124.2	107.5	147	160	34611.1	20056.1	6253.1	13774.2	15254.2	50.6	48.9	67.2	48.5	54	113.4	124.8	113	97.1	105.1	106.4	100.5	118.4	109	159.5	158.9	159.6	92.8	78.5	73.4	36.8	38.8
hsa-miR-183-5p	1387.61	36.6	41.6	40.8	9965.6	9147.6	1475	1320.5	1338.3	1449.5	1428	1234.5	1410.6	1349.6	1560.3	1368.7	1355.4	1042.4	1205.7	1326.3	1673	1379	0.5	0.5	1	1.3	1.5	9.7	11.1	13.6	5.9	6.7	944.8	896	788.3	826.5	767.3	778.6	721.9	952.8	1017.7	1036	383.3	377.6	521.1	658.6	856.2	557.8	721.6
hsa-miR-30b-5p	1375.85	3434.3	3951.9	4951.7	1124.1	1232.1	934.9	946.8	1112.4	1024.4	879.1	992.8	855.8	1037.6	1228	1174.8	1359.3	1053.1	1210.4	868.5	1307.6	1229.3	30.9	16.2	222.1	50.6	57.7	2757.7	2309.3	2538.3	2962.6	2976.1	1312.1	1695.6	1818.1	1685.9	1394.5	1162.9	1425.7	1208.6	1555.4	1668.7	1481.6	1009.8	1205.6	1238.3	1145.1	1062.8	1118.3
hsa-miR-15b-5p	1354.51	334.9	415.8	415.6	1519.5	1540.4	730.9	784	755.8	758.5	758.1	783.7	807.6	788.6	1198	1180.3	1406.6	1742.9	1155.1	1623.6	1196.9	1289.6	281.2	78.8	1489.5	124.8	148	578.1	572	582.4	403	511.6	2008.2	2580.9	1929	1713	1729.3	1903.7	1848.1	3974.1	2335	2498.5	1930.5	1470.8	1304.6	1275.1	1414.1	834.6	922.9
hsa-miR-23a-3p	1264.89	218.4	324.2	300.6	1018.8	1089.9	562.8	592.9	699.4	594.1	447.6	594.9	494.5	560.5	805.3	769.9	840	665.4	790.7	591.5	716.1	803.2	2340.4	562.1	5105	1356.6	1904.5	1767.6	1802.9	2333.9	1478.5	1816.7	33	43.3	38.4	37.3	31	36.1	34.9	54.2	44.6	47.2	38.9	36.3	27.4	20.4	19.1	36.8	42.2
hsa-miR-130b-3p	1229.01	89.7	112.2	109.6	848.3	863.5	879.1	815	845.5	817	931.2	773.6	860.1	770.4	1053.3	1077.7	1035.5	1067.8	892.9	1219.4	948.1	846.4	109.3	54.9	79.4	25.9	38.8	279	251.8	256.3	252.6	246.1	1722.3	1981.4	1914	1794.8	1659	1591.2	1631.9	1662.7	2075	2627.7	1731	1766.5	1659.4	1346.9	1156.9	1134	1079.1
hsa-miR-125a-5p	1139.55	165.1	221.3	136.1	1519.1	1759.8	920.1	1066.3	1276.5	1095.2	1145.7	1007.5	644.5	938	902.8	842.6	1172.2	1314.1	901.5	876.1	880.2	779	15.4	33.6	72.8	244.1	283.6	1659.6	1561.5	1508.8	1024.6	1363.4	637.4	564.4	688.7	517.8	498.1	520.1	440.7	387.8	616.1	544.9	410.9	367.5	388.6	349.7	295.7	251.2	249.5
hsa-let-7c-5p	1089.37	53.4	52.7	48.1	48.2	53.1	116.3	120.7	112.3	108.6	81.8	127.4	97.4	104.3	71.9	85.3	63.2	69.2	89.7	55	74.3	72.6	4941.6	5281.6	8130	7259.3	7890	151.3	140.2	140.3	130.6	141.2	1020.5	1137.9	1030	1043.8	1123.5	1157.9	1127.4	1360	1063.4	1143.7	1387.3	1214.2	1202.6	984.2	847.7	888.8	800.5
hsa-miR-181a-2-3p	1086.3	226.5	241.9	308.8	728	676.1	729.1	1127.2	936.9	1031.4	990.7	1047.2	835.9	783.1	1175.1	1258.7	1235.8	1490.6	1303.7	1102.6	1341.6	916.9	34.7	69	253.8	71.3	91.5	1261.9	1202.8	927.3	1244.9	1177.7	1532	1495	1499.5	1637.2	1681.3	1669.1	1629.5	1439.4	1423.4	1606.6	2107.4	2116.2	1815.3	1890.7	2522.2	2942.6	2663.4
hsa-miR-128-3p	1082.24	231.3	235	195.8	243.9	241.2	445.2	337.1	353.1	384	447	363	449.1	384.3	480.9	406.4	448.3	299.3	465.8	327.1	539.5	437.5	743.4	684.1	752.1	1160	1306.4	326	260.7	220.9	225.4	171.2	2955.8	2163.1	2618.9	2476.6	2376.6	2561.8	2384.8	2263.5	2574.2	2440.8	1381.2	1427.9	1860.4	1767.9	1333.6	1481.3	1698.3
hsa-miR-151a-3p	1073.13	9096.4	7378.6	6678.9	1066.6	1202.2	1414.9	1314.2	1301.7	1250.2	1426.6	1187.1	1205.1	1389.7	1670.2	1687	1634.9	1016	1395.9	985.3	1572.1	1720.7	185	271.7	560.4	558	579	3371.4	2643.6	2929.7	2460.9	2315.6	2.3	1.1	25.4	0.6	0.5	1.3	2.1	2.4	1.7	0.5	1.4	1.3	1.1	1.7	1.7	6	7.1
hsa-miR-19b-3p	1065.6	943.6	954.2	1228	879.9	804.3	1463.5	1570.4	2094.8	1605.7	1284.4	1706.7	1329.3	1722.4	1597.6	1549.6	1755.3	1006	1616.4	945	1403.3	1686.2	8	9.6	122.5	24.5	37	1443.1	1084.5	1260.7	1034.8	703.2	1160.4	1185.2	1196.4	1611.7	880	987.6	670.8	1497.4	1131.8	1295.3	998.1	1217.2	853.9	806.9	1004.4	950.1	950.6
hsa-miR-19b-3p	1045.35	938.9	946.8	1219.6	862.4	788.9	1416.5	1522.7	2048.2	1570.4	1232.1	1667.2	1282.8	1681.3	1553	1517.6	1726	978.2	1586.6	924.6	1373.3	1655	8	9.6	122.7	24.5	37	1438.6	1080.4	1255.4	1030.6	700.3	1134.3	1155.1	1171.7	1585.4	863.6	965.4	660.2	1478.4	1105.6	1272.7	980.8	1201.5	839.8	799.5	995.5	946.3	946.9
hsa-miR-345-5p	1037.16	145.9	141.2	131.1	1062	1085.9	1399.9	1220.2	988.3	1245.6	1243.9	843.4	1317	982.6	1437.6	1553.9	1504.5	1310.3	1112.2	1609.5	1610.7	1156.9	15.7	29.9	47.7	57	46	260.6	266.2	295.7	266.1	286.4	1412.7	1417.7	1510.8	1610.8	1560.8	1622.7	1757.9	1659.2	1465.6	1483.8	1707.7	1622.3	1497.2	1096.5	709.2	628.6	733.9
hsa-miR-106b-5p	1015.57	463.3	442.2	548.9	361.2	380.4	290.8	317.4	372.3	340.7	500.7	289.7	370.6	331.2	656	593.6	1003.6	693.6	567.6	517.4	623.1	615.9	185.4	106.7	463.7	175.1	210.7	325.7	321.1	355.4	256.4	235.3	1664.5	2581.2	2031.2	2189.4	1931	1818.9	1920.4	2258.6	2261.6	2325.5	1920.4	1443.8	1517.4	1259.5	904.6	727.4	804.4
hsa-miR-486-5p	995.162	19555.2	9792.2	5728	711.3	721.1	224.6	277.7	260.5	248.3	333.9	293.9	257.5	218.4	256.2	272.1	293.7	630.4	312.6	474.2	278.8	238.6	430	442.1	252.2	207.4	194.7	1758.1	1919.7	2061.6	1720.3	2221.1	2.2	3.4	2.7	2.8	2.8	2	2.1	3.6	1.6	3.4	6.1	4.3	5.3	4.5	5.3	4.4	3.7
hsa-miR-486-5p	958.774	18413.1	9204.5	5375.8	690.3	694.4	211.9	257	241	232.9	314.4	271.2	247.9	203.1	246.7	258.3	283.6	604.6	296.6	463.1	269.1	228.9	431.7	443.1	253.8	209.7	196.9	1682.8	1829.3	1947.1	1644.8	2130.4	2.2	3.2	2.7	2.8	2.8	2	2.3	3.4	1.8	3.4	5.7	4.2	5	4.6	5.3	4.4	3.7
hsa-miR-9-5p	916.65	7.7	10.1	6.4	621.8	658.9	993.1	831.7	1057.4	993.7	950	969	1033.2	960.7	943.8	1060.3	1192.5	1231.7	1073.1	1128.4	1349.9	1111.6	0.5	0.9	3	3.3	3	20.2	15.9	20.3	18.7	20.4	1268	1416.3	1476.7	1320.5	1287.4	1275.9	1082.6	1245.3	1444.8	1257.1	1858.1	1467.1	1086.8	1164.6	1501.9	1417.4	1323.4
hsa-miR-9-5p	916.485	7.7	10.1	6.4	621.6	658.3	992.6	831.7	1057.1	993.1	949.7	968.8	1032.4	960.3	943.9	1060.1	1192	1230.8	1072.5	1127.8	1349.3	1111.4	0.5	0.9	3	3.3	3	20.2	15.9	20.3	18.7	20.4	1267.5	1416.1	1476.5	1320.4	1287.2	1275.6	1082.7	1245.1	1444.1	1256.8	1857.9	1467	1087	1164.5	1501.5	1417.8	1322.8
hsa-miR-9-5p	916.458	7.7	10.1	6.4	621.6	658.3	992.6	831.7	1057.1	993.1	949.7	968.8	1032.4	960.3	943.9	1060.3	1192	1230.8	1072.5	1127.8	1349.1	1111.4	0.5	0.9	3	3.3	3	20.2	15.9	20.3	18.7	20.4	1267.5	1416.1	1476.5	1320.4	1287.2	1275.6	1082.7	1245.1	1444.1	1256.8	1857.9	1467	1087	1164.5	1501.5	1417.4	1322.8
hsa-miR-340-5p	885.291	600.8	687.2	762.1	980.8	1011.7	1530.1	1375.8	1509.9	1466.1	1261.9	1451.8	1315.4	1557.1	2159.2	2458.4	2481.2	1201.6	2241.1	1182.2	2483.5	2298.1	649.4	1179.2	3046	2909	2660.8	2994.5	2262	2333.5	2882.2	2202.4	0	0	3.3	0	0	0	0.4	0.2	0.5	0.2	0.2	0.3	0	0.3	0	1.8	0.3
hsa-miR-223-3p	870.527	1204.3	1740.9	1447.1	981.5	1017.2	747.6	596.5	682	638.2	850.9	600.2	890.5	693.1	860.8	810.8	880.9	1009.1	878.4	942.6	765.8	775.5	461.3	353.1	3939.1	1169	943.6	5764.3	4695	5059.3	3606.2	3670.6	0.2	0.8	0.2	0.4	0.2	0.2	0.4	0	0	0	0.2	0.3	0	0.1	0	0	0.3
hsa-miR-301b-3p	821.298	9.8	14.7	9.8	328.9	323.6	207.5	198.7	253.5	228.8	197.4	222.5	147.4	215.5	239	220.2	230.6	185.1	220.2	347	192.7	230.3	0.2	1	2.1	1.3	1.8	79	76.7	80.8	64.4	56.3	2004.3	1938.4	1922	2086.2	1876.9	1672	1654.3	1863.9	2505.1	2402.4	949.3	804	927.9	959.9	946.1	1051.7	1096.3
hsa-miR-19a-3p	810.635	221.1	282.4	349.3	850.2	801.3	1418.8	1489.9	1985.2	1584.5	1372.8	1580.2	1408.7	1569.9	1353.8	1378.5	1489.2	800	1299.5	751.8	1255.4	1366.5	0.6	2	7.8	3.5	4.8	748.8	527.4	626.6	395.9	220.7	958.5	906.7	953.4	1340.4	720.6	768.2	562.3	1065.1	945.4	945	716.2	859	593.6	572.6	607.6	543	620.3
hsa-miR-30a-5p	790.623	2687.7	1567.2	2853.3	314.7	326.2	651.6	742.4	793.1	676.2	759.5	768.9	799.7	707.1	624.8	600	603.5	780.2	642	711.5	610	601.2	19.3	55.8	299.7	229.8	201.8	244.9	213	236.7	182.9	202.5	25.7	33.4	93.6	24.6	22.7	23.8	24.3	21.9	23.3	25.5	21.5	23.3	18.9	19.8	17.4	8.4	14.2
hsa-miR-29c-3p	748.08	3912.1	4867.3	5315.3	64.1	72	87.2	98.5	87.7	87.2	104.2	81.9	73.4	85	121.9	118.5	128.8	76.6	104.2	64.2	111.8	115.1	400.3	590.9	4047.9	969.6	1616.4	2014	2654.8	2519.6	2727.8	2406.2	148.3	194.6	177	186.6	156.2	134.5	145.4	126.8	202.9	209.1	124.4	100.4	118.9	97.8	79.9	99.2	103.6
hsa-miR-10a-5p	747.423	2334.1	3386.4	4771.9	338.2	415.6	112.5	111.7	129.8	117.1	145.7	133	125.9	135.4	140.6	120.1	157.2	268	143.8	208.4	152.3	160	167.4	240	327.1	177.2	270.8	3441.4	3471.9	4140.3	2967.7	3661.1	53.9	63.2	288.1	58.3	54	68.1	46.5	71.9	68.4	83.9	102.9	93.7	120.9	100.3	71.9	75	68.3
hsa-let-7e-5p	746.108	79.9	98	74.3	680.3	811.7	354.9	381.3	438.3	373.3	290.9	401.7	215.5	391.9	418.9	454.5	452.1	622.7	505.1	541.3	448.5	439.7	4546	5295.2	691.4	1522.7	1307.2	275.3	241.1	330.3	242.9	303.3	478.9	453.6	443.1	392.6	445.6	483.9	453	489.1	421.9	591	764.9	691.4	566.4	408.3	353	188	197.8
hsa-miR-24-3p	703.821	146.3	213.9	204.4	438.8	434.9	186.1	181	270.1	213.7	118.6	191.4	153	192.5	309.4	295.8	335.4	235.5	312.9	216.3	305.6	319.8	1505.9	731.9	1597.8	942.8	1058.6	407.3	392.9	513.4	265.6	417.3	18.5	25.6	20.3	15.6	17.3	17.2	19.6	34.2	18.3	24.8	20.7	15.5	15.8	15	14.6	11.4	14.6
hsa-miR-24-3p	691.923	145.1	211.6	199.1	431.6	428.5	177	171.2	260.3	204.2	113	178.9	145	185.6	299.2	287.4	327.9	229.7	302.4	210.8	295.6	313.8	1504	731.1	1559.5	918	1033.4	401.7	385.6	504	261.4	407.7	17.9	25	20.1	15.4	17.3	16.5	19.1	34.2	18.4	24.4	20.5	15.2	15.6	14.8	14.4	11.4	14.6
hsa-miR-151a-5p	677.208	6468.5	6893.8	5898.3	498.6	575.5	706.9	649.4	680.3	667.9	680.1	547.5	489.3	667.1	1092.3	1062.6	1034.1	700.6	927.8	635.4	936.3	966.5	48.6	54.9	184.5	194.3	203.2	722	852.6	871.6	663.6	856.5	1.4	1.2	15.3	2.6	1.7	1.6	1	0.6	1.1	1.5	2.6	1.2	1.3	0.9	0.2	0.7	1.6
hsa-miR-500a-3p	664.988	157	284.5	218.7	1166.4	1182.6	899.2	863.1	956.5	956.1	949.2	895.4	931.3	840	811.3	773.8	894.3	910.5	813.5	971.2	951.5	791	3.3	4.9	17.5	15.8	14.3	455.1	396.6	415.1	364.7	471.3	956.7	871.1	844.4	784.7	743.2	901.5	727	1033.2	933.9	933.6	733.3	738.1	708.3	658.2	665.3	350.2	453.5
hsa-miR-181c-5p	661.365	330.9	438.6	464.8	56.7	50.2	103.8	98.9	155.2	117.4	97	132.6	78.9	117.5	119.1	110.9	111.1	111.5	157.8	107.1	114.1	128.9	17.3	32.9	132	37.1	46.8	734	1325.8	1634	1406.8	1401.5	547.2	666.9	632	641.7	603	570.8	602.9	512.5	644.5	710.7	1021.6	854.5	712.8	610.5	427.7	333.2	405.1
hsa-miR-106b-3p	655.508	805.1	632.1	736.1	208.8	221.1	285.2	181.8	341.4	288.5	348.5	295.8	371.7	317.4	493.3	324.9	532.2	474.5	505.8	461.3	516.6	548.6	38.4	61.5	62	77.4	70.2	527.1	528.2	455.4	535.2	484.3	842	896.3	895.2	1044.3	1019.3	1002.8	930.6	905.9	885.1	870.8	798.4	888.1	1086.3	1186.4	1366.6	2051.2	1892.9
hsa-miR-744-5p	636.705	39.2	42.8	34.7	98.3	93.8	148.2	105.6	114.5	138.4	138.4	122.1	139.8	137.1	163.6	160.5	162.3	128.4	184.1	170.2	214.2	180.5	1510.7	2541.5	1571.8	2857.2	2431	123.9	145	164.2	153.4	183.4	488	488.6	587.6	567.3	588.1	585.3	574.1	695.7	534.6	495.4	488.6	430.7	550.2	511.7	427.2	377.7	388
hsa-miR-126-5p	636.608	596.7	232	218.8	1619.4	1672	920.1	921.1	836.7	889.8	940.6	700.4	1049.7	825.8	1689.7	1601.6	1578.4	1202.7	1163.7	1538.7	1505.3	1550.2	123.2	118.6	146.7	86	87.4	3496.1	2443.8	2685.8	2877.2	2792.7	160.8	177.2	135.3	152.1	126.8	139.6	145.3	224.8	155.3	186.7	60.7	60.9	115.7	141.8	138.7	80.9	108.7
hsa-miR-532-5p	627.453	588.4	618.2	654.3	505.8	526.1	828.4	794.9	778.6	731.2	674.5	786.9	849.5	820.2	825.5	845.9	718.9	530.9	841.2	717.9	971.1	898.2	18.6	31.1	100.5	68.6	72	1223.7	1119.5	993.1	904.1	885	505.7	647.2	531.9	564.1	605.5	527.5	603.1	656.7	560.7	608.7	765.8	677.5	611.9	645.2	689.6	870	886.6
hsa-miR-197-3p	612.024	820.6	899.4	760.5	671	664.2	616.6	670.8	712.6	677.9	503.6	762.3	632.3	653.8	698.7	775.6	794	604.1	809.7	600.5	799.4	873.4	13.4	4.6	47.9	14.8	13.5	528.6	465.7	488.1	369.1	422.3	633.2	644.1	572.6	564.7	560.3	602.6	580.9	663.7	524	608.4	451.1	434.6	525.1	523.9	515.2	626.8	616.1
hsa-miR-1307-3p	594.965	84.4	105.1	95	334.2	339.8	618.2	632.6	539.5	607.2	663.5	498.3	766.2	580.2	580.8	641.5	634	679.4	534	1034.6	798.4	639.7	680.9	736.6	708.9	645.4	648.3	27	140.3	144.6	184.7	234.4	683.2	835.2	714.9	736.3	730.9	737.5	813.8	900.1	677.8	742.6	387.3	450.3	649.5	744.6	772.5	910	920.3
hsa-miR-2467-5p	594.824	2.3	4.8	2.8	64.1	67.2	104.6	108.5	80.2	105	93.5	89	111.9	70.6	70	79.6	83	58.1	58.2	70	94.7	74	0	0	0	0	0.1	19.4	10.3	24.6	16.5	17.5	1269.5	1553.2	1264.8	1222.8	1238	1290.6	1231.3	1672.2	1194.9	1557.6	2525.1	2125.1	1346.7	1192.5	1201.1	913.8	900.2
hsa-miR-18a-5p	512.445	44.9	36.7	47.4	508.2	600.6	502.2	489.6	606.4	635.1	474.5	497.3	603.4	552	592	574.5	697	529.7	471.4	602.9	694.5	735.5	2	2.9	22.9	4.2	5.6	52.8	54.2	67.5	45.9	46.2	683.8	1067.2	829.6	854.8	717.5	675.1	693.6	1087.5	944.2	952	718.7	539	478.5	454.8	514.6	229.9	298.5
hsa-miR-28-5p	498.986	1324.7	1360.4	1108.4	314.7	333.6	310.6	332.7	322.7	352.5	308.9	333.9	193.1	320.7	463.4	447.7	421.6	373.4	452.3	394.8	402.8	397.7	10.8	24	121.6	78.3	94.1	894.2	817.5	710.2	1007.2	915.8	576.6	599.3	620.8	629.1	570.4	584.3	611.2	553.5	622.6	629	496.8	478.4	543.4	478.2	305	300.6	370.2
hsa-miR-454-3p	493.511	138.3	153.1	177.5	311.5	325	652.3	567.5	608.3	615.7	587.2	529.9	581.3	552.3	459.5	450.3	540.6	412.7	432.9	471.6	523.6	446.3	0.2	0.7	8.7	2.7	3.5	306.9	240.8	291	224	245.8	950.4	941.6	865.2	794.6	761.6	816.6	700.8	977.4	935	928.9	557.6	533.4	532.9	570.6	585.7	285.6	372.4
hsa-miR-1260b	484.697	1323.4	1580.9	1620.1	407.3	481.6	67.8	79.3	97.9	49	65.5	66.6	94.2	63.5	516.4	521	563	770.1	401.1	460.6	489.3	492.8	16.9	7.4	22.3	6.2	9.2	142.6	165	162.8	116.2	164.8	430.3	522.2	467.9	586	486.6	568	587.8	665.4	623.6	540.5	478.9	428.5	446.2	375.6	326.1	319.9	368.7
hsa-miR-363-3p	468.241	1720.3	1560	1794.5	104.3	107.1	111.9	118.4	110.1	129.2	106.3	124.9	108.2	134.5	177.7	159.2	172.7	96.8	169.6	129	156.5	178	46.5	91	119.6	23.1	36.2	1205.7	1142.8	942.8	882.8	931.5	0	0	0	0	0	0	0.2	0.2	0	0	0	0	0	0	0	0	0
hsa-miR-205-5p	466.332	0	0	0	0.1	0.1	0	0	0.3	0	0	0	0	0.2	0	0	0	0	0	0	0	0	0	0	0	0	0	0.2	1.3	0.8	0.7	0	0	0	0	0	0	0	0	0	0	0	0	0	0	0	0	0	0
hsa-miR-1260a	457.448	1256.7	1469	1506.6	378.7	430.9	58.6	67.7	76.1	44.8	54	59.1	80.2	55.5	408.7	438.3	462.2	600.4	335.4	369.4	402.4	392.7	13.1	5.9	23.1	6.7	8.8	142.5	166.9	157.9	111.2	156.1	424	521.1	459.6	581.2	483.2	567	580.6	656.5	616.3	534.8	474.7	427.2	440.6	372.6	323.5	302	361.9
hsa-miR-421	432.542	52.4	62.7	53.9	418.9	455.2	350.5	326.8	305.6	362.7	355.1	287.6	383.4	314.9	355	378.2	371	330.7	382.2	420.8	416.8	332	15.2	20.5	22.2	8.2	8.3	339.5	254	273.2	326.8	286	663.4	575.1	634.2	671.1	615.9	624.9	609.8	615.4	685.4	666.2	428.5	455.7	537.3	483.3	399.1	331.8	365.3
hsa-miR-660-5p	419.353	306.4	312.5	391.3	256.5	280.2	518.1	460.2	514	445.6	445	487.6	486.2	629.1	506.7	540.3	554.7	345.8	470.9	378	558.8	712.4	11.1	16.5	85.9	36.7	35.6	565.1	538.3	612.1	577	506.9	366.5	447.5	404.9	429.4	413.1	374.7	392.9	465	414.7	483.8	364.9	405.5	466.8	473.5	501.9	530.8	603.5
hsa-let-7d-3p	409.161	196.4	219.7	185.6	390.6	401.2	344.1	305.1	307.6	368.2	349.9	291.3	350.2	316.4	382.8	388.3	412.3	408.1	327.6	431.3	481.5	371.4	29.6	30.2	82.3	38.7	25	257.4	220.6	231.8	152.1	150	382.7	428.1	464.5	385.7	389.4	388.1	357.4	450.2	377.6	388.8	357.1	250	334.3	342.6	357.7	366.5	456.3
hsa-miR-210-3p	404.008	48.6	47.2	50.9	33.1	28.2	102	152.1	92.9	152.8	69.1	91	87.1	145	154.6	182.7	170.8	293.5	99.2	267.7	189.1	113.9	14.2	16.2	13.6	2	3.9	15.6	25.9	31.1	27.5	24.1	169.5	237.5	204.8	261.8	246.6	218.7	227.7	245.4	202.9	255.4	223.4	194.7	202.6	211.4	186.8	298.5	274.1
hsa-miR-671-3p	387.583	40	24.2	24.9	72	64	77	90.6	119.9	64.8	99.5	85.1	53.1	50.2	121	130.3	130.7	194.7	132.4	123.4	130	77.5	1.4	1.1	3.7	6.4	5.7	96.2	79.9	47.5	96.9	81.5	900.1	706.7	815.5	974.2	988.5	970.5	916.8	890.4	972.5	679.3	496.6	603.1	841.9	911.9	913	809.8	829.3
hsa-miR-361-3p	387.106	3092.7	3075.7	2705.3	55.7	56.1	197.3	190.7	157.3	159.1	222	178.2	187.7	167.5	121.7	138	132.6	139.5	127.6	143.2	118.3	138.5	6.2	8.2	34.9	65.5	74.8	798	863.7	838.1	871.8	942.9	135.1	133.2	142.9	131.6	124.1	129	116.3	94.8	141.3	143.6	116.9	138	147.7	158.7	146.5	136.7	134.9
hsa-miR-148a-5p	376.188	12.4	49.2	48.6	336.9	322.3	477.8	1102.2	623.1	595	535.9	564.1	601.4	407.6	883.5	1407.6	741.8	988.3	806.5	1055.5	926.5	609.9	0.2	0.2	1.1	1.3	2.2	68.5	49.1	45.6	72.2	61.8	305.2	308	299.7	320.3	290	298	294.3	262.4	332.5	291.6	552	444.6	381.1	372.2	471.8	339.2	355.9
hsa-miR-374a-3p	374.658	170.8	167.3	223.6	261.9	255.3	340.6	361.1	309.7	342.1	360.9	326.7	331.5	336.1	585.1	558.6	597.5	316.4	520.5	251.1	577.2	532.9	38.2	48.6	309.5	301.3	309.7	438.6	364.3	379	394.4	275.4	505.5	537.1	477.7	487.9	448.1	428.2	396.4	419.4	517.3	558	595.5	541.4	487.7	533.7	700	563.8	543.3
hsa-miR-199a-3p	372.097	21.1	27.2	24.1	108.9	117.4	86.2	90.5	93	95.7	131.9	78.5	135.8	87.4	148.6	136.6	145.7	170.1	117.5	199.9	150.1	125.1	1788.8	2868.6	4706.5	5683.2	6441.1	104.2	86.9	92.3	98.2	83.2	9	10.7	29.4	11.4	9.7	10	8.3	8.5	10.6	11.3	8.8	8.9	9.3	9.1	6.2	3.4	4.8
hsa-miR-199b-3p	369.614	20.4	25.6	23.9	104.7	110.5	79.6	81.2	85.8	85.6	121	70.2	120.6	80.6	140.1	130.5	138.8	164.3	110	193.1	142.5	119.5	1788.8	2868.3	4705.1	5682.2	6439.1	102.6	84.2	91.3	95.7	82.4	9	10.7	29.4	11.2	9.2	10	8.3	8.3	10.6	10.9	8.6	8.6	9.2	9.1	6.2	3.4	4.8
hsa-miR-199a-3p	369.611	20.4	25.6	23.9	104.7	110.5	79.6	81.2	85.8	85.6	121	70.2	120.6	80.6	140.1	130.5	138.8	164.3	110	193.1	142.5	119.5	1788.8	2868.3	4705	5682.2	6439	102.6	84.2	91.3	95.7	82.4	9	10.7	29.4	11.2	9.2	10	8.3	8.3	10.6	10.9	8.6	8.6	9.2	9.1	6.2	3.4	4.8
hsa-miR-143-3p	366.42	248.4	200.7	123.3	369.4	423.1	99.2	107.4	114.2	121	110.8	111.9	79.1	115	204.3	221.6	276.5	281.7	231.3	285.7	264.7	241.3	118	61.5	279.9	181.9	243.2	600.8	427	440	503.9	485	18.2	66.3	223.6	20.3	19.9	22	16.9	27.3	20.1	24.4	35.8	31.2	29.9	29.3	37	41	45
hsa-miR-17-3p	360.138	197.1	192.7	209.1	204.7	211.2	340.8	395.4	342.4	341.1	392.5	285.6	333.4	321.8	370.8	373.2	374.7	357.2	298.2	342.1	342.7	342.3	55.6	85.5	51.1	21.5	28.8	129.4	112.9	106.9	91	72.6	577.2	647.2	653.8	701	616.1	595.5	567.1	533.9	645.9	688	473.2	427.9	433.7	357.4	247.6	228.1	244.3
hsa-miR-30c-1-3p	356.221	17.7	10.3	13.1	705.5	587.8	1067.9	1148.3	1057.1	1032.7	1178.3	1277.2	1090.4	1142.6	1494.7	1348.4	1177.8	1502.4	1478.6	1219.2	1179.9	1269.8	2.9	5.3	9.6	9.3	7.5	31.3	29.3	28.2	32	24.2	77.6	56.9	60.6	66.8	81.4	67	52.7	50.5	60.4	71.9	38.4	50.6	70.3	67.9	70.1	37.1	41.7
hsa-miR-361-5p	355.979	546.9	608.7	546.9	576.7	543.4	187.9	211.2	212.4	222	175.7	198	184.9	219.7	257.2	254.2	276.5	279.3	237.5	276.6	244.7	270.5	14.6	16.9	215.1	32.3	48.1	436.8	340.9	375.1	299.4	368.2	323.3	294.1	292.7	297.6	273	261.3	288.2	249.3	352.8	270.1	225.6	173.6	201	191.6	156.8	84.1	107.1
hsa-miR-130b-5p	320.938	12.4	18.2	7.3	135.6	137.4	221.1	216.5	194.4	216.1	300.3	194.3	274.6	183.4	319.7	306.1	302.4	264.7	333.9	274.2	318.4	243.5	1.3	2.6	4.5	8	7.2	50	37.3	31.7	34.4	36.7	943.9	583.8	835.7	777.8	716	730.9	560.9	399.2	569.4	660.5	545.8	527.7	603.4	508.8	406.1	333.9	320
hsa-miR-339-3p	318.456	360.3	297.4	343.5	329.8	419.4	711.6	697.6	655	660.5	610.1	654	569.1	675.2	917.2	933.7	771.8	601.9	961.8	544.6	820.3	792.1	88	78.2	38.8	46.6	50.5	392.1	434.1	395.8	536	567.3	113.7	132.6	141.9	151.5	150.7	155.8	137.1	115.2	142.4	118.5	99.3	90.8	141.3	123.8	97.6	126.1	121
hsa-miR-181b-3p	302.003	5.7	3.2	7.4	0.9	0.4	0.3	0	0.3	0.2	0.5	0	0.6	0	0	0.4	0.3	0.7	1.7	0.5	0.6	0.2	0.3	0.8	10.5	9.3	11.8	13.8	11.9	8.9	12.8	16.1	778.8	965	682.9	601	611.5	644	655.3	744.1	607.4	800	1199.7	880.5	546.6	537.5	781	512.8	463.5
hsa-miR-582-3p	287.171	165.1	188.4	202.3	476	506.8	923.9	964.5	1051.7	1122.5	1092.8	968.9	946.2	680.6	1138.4	1239.5	1254.8	971	1401.2	756.2	1304.2	993	0.5	0.9	6.9	16.8	8.9	101.8	75	61.2	82.4	75.9	0	0	0.2	0	0.4	0.4	0	0.2	0	0.1	0.2	0	0.3	0	0.7	0.7	0
hsa-miR-149-5p	281.033	2.3	0.4	0.3	18.1	18.3	45.9	48.9	57.9	49.7	50.8	41.3	59.7	42.2	43.1	40.8	50.4	55	36.8	51.7	51.2	43.5	0	0	0	0	0.2	2.8	1.5	0.7	2.5	1.2	725.2	861.9	943.4	867	705.4	643.5	656.2	468.2	682.5	846.2	374.1	429.2	638	652.7	645.2	1415.9	986.3
hsa-miR-941	280.424	64.5	66.1	69.1	493.4	518.8	348	325.8	346.3	327.3	359.6	291.7	303.4	270.5	316.1	328.1	337.7	343.8	277.6	332.3	336.9	264.5	2.2	7.1	14.7	9.5	15.3	148.7	187.5	231.4	129.9	156.9	347.8	299	271.9	269.8	325.8	409.5	397.8	624.7	359.1	298.8	198.8	178.9	193.4	215.3	280	124.7	183
hsa-miR-941	280.424	64.5	66.1	69.1	493.4	518.8	348	325.8	346.3	327.3	359.6	291.7	303.4	270.5	316.1	328.1	337.7	343.8	277.6	332.3	336.9	264.5	2.2	7.1	14.7	9.5	15.3	148.7	187.5	231.4	129.9	156.9	347.8	299	271.9	269.8	325.8	409.5	397.8	624.7	359.1	298.8	198.8	178.9	193.4	215.3	280	124.7	183
hsa-miR-941	280.424	64.5	66.1	69.1	493.4	518.8	348	325.8	346.3	327.3	359.6	291.7	303.4	270.5	316.1	328.1	337.7	343.8	277.6	332.3	336.9	264.5	2.2	7.1	14.7	9.5	15.3	148.7	187.5	231.4	129.9	156.9	347.8	299	271.9	269.8	325.8	409.5	397.8	624.7	359.1	298.8	198.8	178.9	193.4	215.3	280	124.7	183
hsa-miR-941	280.424	64.5	66.1	69.1	493.4	518.8	348	325.8	346.3	327.3	359.6	291.7	303.4	270.5	316.1	328.1	337.7	343.8	277.6	332.3	336.9	264.5	2.2	7.1	14.7	9.5	15.3	148.7	187.5	231.4	129.9	156.9	347.8	299	271.9	269.8	325.8	409.5	397.8	624.7	359.1	298.8	198.8	178.9	193.4	215.3	280	124.7	183
hsa-miR-941	280.424	64.5	66.1	69.1	493.4	518.8	348	325.8	346.3	327.3	359.6	291.7	303.4	270.5	316.1	328.1	337.7	343.8	277.6	332.3	336.9	264.5	2.2	7.1	14.7	9.5	15.3	148.7	187.5	231.4	129.9	156.9	347.8	299	271.9	269.8	325.8	409.5	397.8	624.7	359.1	298.8	198.8	178.9	193.4	215.3	280	124.7	183
hsa-miR-3615	255.835	52.4	62.3	30.2	38.3	32.9	137.8	127.5	136	134	160.2	124.9	139.8	129.1	125.9	131.9	123.9	193.8	137.4	197.9	143.1	129.1	23.6	23.3	18.1	12.1	15.3	51.2	110.9	114.2	128.8	162.8	495.6	419.2	536.7	580.1	554.2	559.5	493.1	392.6	529.3	458.6	542.4	647.9	701.2	658.9	580.7	757.2	665
hsa-miR-589-5p	253.117	174.9	212.2	204.9	321.7	348.2	196.7	198.4	234.4	215	220.6	194.3	207.4	189	314	293	328.6	376.2	312.3	330.8	340.5	294.1	2.7	6.5	1.4	1	1.7	157.1	123.3	165.8	107.8	143.3	303.9	302	261.5	250.1	278.6	314.2	316	430.6	279.4	263.7	418.9	332.5	251.4	171.4	127.8	63.1	81.5
hsa-miR-130a-3p	226.15	38.1	27	23.8	0.1	0.1	0	0.4	0.3	0.6	0.7	0.8	0	0.1	0.7	0.7	0.4	0.3	0.2	0.1	0.4	0.4	333.5	239.4	98.7	17.1	49.3	132.7	141.1	136.5	174.3	162.4	445.7	612	621.9	609.4	451.9	378.9	416	284.5	532.9	627.1	318.5	304.6	373.1	342.5	318.5	560.8	478.9
hsa-miR-15b-3p	219.779	39.6	34.5	51.7	135	139.7	130.7	117.6	149.3	130	125.8	147.8	134.1	152.1	264.9	216.6	275.1	191.9	203	191.5	139.8	254.4	3.5	3.7	19.5	5.3	3.7	28.2	37.5	39.2	28.1	27.2	412.9	561.3	395.6	380.1	457.2	370.4	375.7	528.2	425.2	457	460	367.1	345.1	303.4	304.2	185.7	227.5
hsa-miR-339-5p	217.498	93.1	82.5	124.9	252.2	250.7	451.3	398.3	414.1	408	442	409.5	493.7	460.7	536.3	488.8	611.6	416.8	512.7	432.8	554.5	584.6	20.3	11.7	25.2	17.7	23.8	139.1	163.4	177.7	111.6	137.2	42.8	70.8	57.1	64.4	54.5	50.1	51.1	48.6	62.3	69.6	67.9	60.1	56	48.9	35	24.5	37.9
hsa-miR-221-5p	215.303	131.6	125.3	163.8	309.6	310.8	418.9	346.5	293.9	454.3	401.4	373.5	389.3	486	275.8	215.2	244	184.2	216	140.2	248.8	259.4	663.4	283	515.2	613.3	574.1	30.1	31	52.8	17.2	27.4	93.9	95.2	84	89.8	61.3	79.5	33.6	89.6	101.6	89.7	78.3	64.2	43.1	27.5	29.8	11.6	18.1
hsa-miR-181d-5p	213.764	17	14	10.7	29	29.7	33.1	32.5	47.9	40.3	32.2	33.2	29.5	39.5	34.5	37.2	37.4	37.5	31.3	37.2	45	40	314.5	416.3	365	129.7	154.2	72.2	110	117.5	130.3	123.2	341.9	325.2	317.6	309.4	307.8	317.2	307.9	337.5	352.4	317.2	289.6	320.1	306.9	348.3	461.5	536.3	509.9
hsa-miR-7974	211.333	1.1	2	3.9	18.4	27.4	81.5	75.7	162	86.3	91.1	91.9	138.8	75.7	82.4	64	56.5	85.5	70	105.4	69.6	66.4	0	0	0	0	0	4.3	4.1	7	3	4.4	455.7	455.6	430.3	363.6	413.1	476.4	385	566.8	431.5	479.9	789.2	628	362.3	345.2	439	306.2	307.4
hsa-miR-652-3p	208.356	203.2	187.2	157.6	158.5	153.5	72.6	72.9	84.6	86.5	78.2	93.3	108.4	84.3	115.3	112.5	129.1	128.1	122.7	142.4	147.1	147.7	25.3	17.7	48.9	4.8	13	185.2	226.5	221.5	211.4	241.9	99.9	152	124.8	119.9	110	118.5	128.1	159.7	118.5	136.3	123.7	101.6	89.1	89	89.5	98.5	116.5
hsa-miR-16-2-3p	187.244	144	181.2	153.2	106.3	107.6	145.1	184.6	210.5	160.3	188.8	173.7	153.3	150.6	295.6	254.8	266.1	219.8	307.4	202	224.1	240.1	4	5.4	10.4	8.2	6.3	193.1	147.3	139.3	127	114.2	240.4	246.4	258.2	310.2	279.6	244.7	206.8	173.2	222.4	255.5	277.2	237.8	269.5	215.7	151.8	106.5	109.1
hsa-miR-148b-5p	184.705	45.6	46.8	45	136.2	144.7	233	228.3	242.7	268.3	199.8	207	245.8	193.1	191.1	182.9	192.5	150.9	179	252.4	216.8	167.8	7.1	16.5	22.7	25.3	24.4	80.8	83.4	91.2	83.8	69.1	295.4	305.9	298	271.2	280.7	291.4	294.5	260.6	308.4	291.6	223.2	183.7	221	197.1	155.2	65.9	95.5
hsa-miR-34a-5p	183.056	26	20.2	9.2	63.7	63.3	40.3	51.8	48.3	55.7	34.7	46.5	24.1	47.8	61.1	63.4	63.8	28.9	52.1	34.8	56.2	49.5	0.3	0.2	2.1	0.3	0.4	50.7	50.4	88.9	50.2	45	7.1	9.7	8.3	7.9	5.9	6.6	7.9	6.6	5.5	8.7	7.8	8	4.1	3.9	3	7	7.8
hsa-miR-342-5p	179.123	116.5	119	98.1	22.9	19.1	27.4	26.6	28.3	34.7	29.5	22.5	33.7	27.5	22.4	22.5	25	26.1	19.5	28.3	31.6	23	67.1	165.2	113.9	54.4	68.3	217.8	186.7	173.3	198.5	184.1	333.4	333.7	363.6	273.8	267.4	315.2	268.7	324.9	347.2	277	229.4	235.4	206.1	218.9	332.1	349.3	332.6
hsa-miR-378c	175.539	178	236.4	238.8	95.7	114.8	74	85	88.5	81.8	103.2	86	101.4	77.2	249.7	220.4	248.7	213.3	249.4	244.7	249.5	222.7	59.1	64.2	418.6	590.6	375.9	174.3	141.4	160.2	165.8	148.9	136.2	191.4	157.4	166.4	157.1	129.5	156.4	155	150.5	161.3	148	140.6	152.5	159.9	157.5	183.1	180
hsa-miR-331-3p	172.229	54.7	39.3	61.2	24.2	26	40.7	40.8	42.6	47.5	36.8	38.4	43.3	46.5	53	52.9	67.5	62.8	46.2	52.8	65	70.6	26.7	3.2	42.7	36.7	44.6	85.6	84	131.2	89.5	105.6	259.6	365.2	284.8	325	280	237.9	274	323.8	327.3	386.4	230.2	180.3	233.1	241.2	307.9	371.4	373.1
hsa-miR-30d-3p	171.609	150.4	131.3	145.5	144.8	131.7	203.1	190.1	245.1	209.2	168.6	176.9	117.9	181.5	260.3	281.1	273.7	156.7	222.1	154.4	269.9	230.1	0.3	0.7	2.5	1.5	1.6	172.7	114.1	96.8	158.1	111.2	250.2	275	241.2	273.1	232.5	224.7	213.3	236.5	254.8	314.5	153.1	145.1	199.9	196.9	154.9	67.8	81.5
hsa-miR-374a-5p	171.08	197.7	217.2	285.5	271.4	252	124.1	125.8	112.5	132	124.8	97.3	103.4	100.7	166.2	175.1	177.6	110.3	132	116	149.7	154.3	67.6	89.7	147.9	84	103.5	296.3	276.4	317.4	200.4	225.9	149.2	146.3	125.4	132.9	118	130.2	129.2	149.4	182.3	142.8	92.7	69.1	67.9	65.5	70.8	34.3	45
hsa-miR-1246	168.435	2.6	3.2	1.7	7.9	11.8	10.5	4.4	39.2	10.4	12.7	20.2	28.6	13.7	44.4	31.5	26.8	204.6	88	192.5	42.4	46.1	9.1	3.4	4	3.4	1.1	1408	1569.2	1447	2127.4	1659.9	5	6	5.7	11.4	5.6	5.1	6.3	6	8.4	5	5.8	8.4	16.6	16.7	11.7	43.6	50.6
hsa-miR-451a	167.589	44.9	55.9	450.2	3.9	4.4	6.1	10.1	10.6	8.6	4.7	11.4	4	10.5	8.6	8.9	9.8	2.6	11.5	6.8	7.7	14.1	2279	790.7	1978.1	1533.7	1719.2	403.4	374.5	461.9	404.1	399.7	0.5	0.8	0	0.2	0.4	0.4	0.2	0.2	0.3	0.5	0.4	0	0	0.3	0	0	0
hsa-miR-425-3p	163.073	49	44	50.3	239.2	215.1	258.6	249.6	339	314.6	179.2	263.1	286.3	234.5	310.7	254.2	354.6	306.2	327.6	307.8	363.1	307.3	39.6	49.6	112.3	74.4	67.2	16.8	101.3	102.7	87.4	115.3	70.7	108.5	72	74.1	62.8	63.9	73.5	96	76.6	99.1	71.7	55.2	54.6	51.4	48.3	42.4	47.6
hsa-miR-141-3p	162.342	1767.6	1579.3	2243.1	28.6	28.3	11.1	7.3	14.7	10.6	7.7	14.8	5.4	8.6	14.4	13.8	17.2	9.7	16.2	12.5	14.4	14.7	0.2	0.6	0.6	0.6	0.8	485.3	676	807.2	441.2	415.1	27.9	35.7	27.6	26.2	24.8	22.7	23.2	33.1	31.6	28.3	20.8	18	13.8	13.5	9.6	7.7	5.8
hsa-miR-501-3p	153.776	216.4	290.1	282.8	136.4	131.4	182.4	195.8	195.7	221.4	249.4	171.9	187.9	192.5	260	212.1	236.6	150.3	208.5	255.4	256.5	186.7	0.6	1.1	1.8	2.9	1.7	5.1	105.1	115.8	50.3	85.5	291.1	259.8	250.1	212.1	172.2	170.7	68.4	120.8	263.1	232.8	125.2	111.6	150.6	127.7	137.6	42.9	68
hsa-miR-23b-3p	153.412	94.4	126.3	108.9	158.9	178.1	100.6	99.4	113.3	101.5	84.8	108.3	119.6	113.4	99.3	91.9	123	99.1	92	89.9	107.7	123.8	374.4	125	781.2	180.1	294.8	225.7	221.7	240.5	195.9	220	107.8	109.1	93.9	96.2	102.2	91.6	95.7	148.2	111.5	113.2	90	70.4	68.1	65.5	66	73.6	85.9
hsa-miR-199b-5p	153.194	12.4	18.2	28.8	227.4	233.6	496.8	575	499.9	536.7	810.2	377.9	683.1	436.1	548.2	500.5	541.5	610.8	357.7	688.7	468.3	409.5	1.3	0.6	4.3	7.9	6.3	59.6	57.2	75.7	61.5	64	30.3	32.5	28.1	28.8	27.3	25.4	20.6	21.5	31.5	38.3	26.4	22.5	21	15.7	10.4	3.5	5.8
hsa-miR-1304-3p	150.544	13	19.8	12.7	87.7	85.2	110.9	140.3	113.2	124.1	153.4	101.3	148.9	118.6	158.7	193.5	158.5	154	170	165.1	209.4	162.9	5.6	6.1	3.8	4.5	3.5	48.3	39.5	30.1	40.6	41.4	228.3	192.7	227.9	237.3	253.8	241.3	205.6	182	195.3	212.9	304.6	309.8	263.2	255.7	326.6	472	396.1
hsa-miR-326	146.312	1.1	0.8	2	17	15.4	26.8	22.1	33.8	30.1	17.3	35.6	25.5	35.8	42.8	37.5	54.9	38.8	45.8	35.4	57.6	65.9	3.9	1.5	14.9	5.6	8.1	55.9	62.8	70.7	60.4	73.5	0	0.3	0	0	0	0	0	0	0	0.1	0	0	0	0	0	0	0
hsa-miR-7706	145.585	48.3	69.8	58.4	87.5	91.3	90.2	87.3	96.6	89.8	65.8	90.4	85.9	93.5	70.9	68.7	68.4	62.2	79.4	87.1	97.3	73.9	0	0.1	0.9	0.9	0.2	62.3	53.6	57.7	52.9	53.3	240.6	183.2	203.2	211.7	252.2	248.3	265	233.3	229.6	189.2	186.5	211.8	245.8	280.2	358.2	399.1	424.5
hsa-miR-196b-5p	136.003	3.4	3.6	2.5	417.6	453.1	453.1	436.3	506.4	495.9	444.1	490	457.5	423.9	464.7	504.2	556.5	507.3	503.6	470.8	689.2	493.3	4.9	5.6	14.1	1.5	2.7	32.9	29.3	27.5	31.8	27.5	0	0	3.7	0	0	0	0	0	0	0	0	0	0	0	0	0	0
hsa-miR-193a-5p	133.714	58.4	44.4	55.9	38.7	44.9	33.9	34.5	35.6	32.8	38.9	37.9	34.2	34.5	52.7	56	51.7	81.3	69.3	62.7	57.3	57.1	15.3	5	15.9	11.8	10.8	8.4	22.5	34.2	19.2	40.1	8.1	10	9.7	6.5	6.5	7.7	6.3	7.9	6.6	8.5	9.8	9.3	7.3	7.9	9.1	4.6	3.2
hsa-miR-138-5p	132.408	19	31.7	41.1	0.2	0.3	0.8	1.3	0.7	1.1	1.1	0.6	0.8	1.1	1	0.7	1.5	1.8	0.7	0.6	0.9	0.6	0.4	0.6	0.5	0.1	0.6	10.1	10.8	13.2	14.9	8.6	208.1	305.9	335.1	313	258	193.6	248.5	163.7	269	331	110.4	124	232.5	243.5	232.6	558	482.6
hsa-miR-138-5p	127.865	17.5	28.2	35.2	0.2	0.3	0.8	1.1	0.7	1	0.8	0.6	0.8	1.1	0.7	0.7	1.3	2	0.5	0.6	0.9	0.7	0.4	0.6	0.6	0.1	0.6	8.9	9.8	12.3	14.7	8.6	201.5	294.1	325.6	301.7	250.1	183.4	242.5	153.4	260.8	319.2	99.2	115.7	222.6	236.2	226.7	548.5	474.5
hsa-miR-146b-3p	124.064	59.6	56.7	52	43.8	45.9	61.6	79	87.2	73.6	78.5	94.7	45	75.3	88.7	89.5	106.3	155.4	140.8	89.6	104.6	87.8	7.9	14.8	25.3	11.8	14.8	563.7	581.7	590.6	568.1	590.4	5.4	4.7	6	8.5	10.2	9.2	3.7	5.8	6.4	5.2	3.6	5.6	8.9	8.6	7.6	9.8	9.4
hsa-miR-4286	123.727	214.5	226.4	200.4	98.1	88.5	21.5	20.5	31.4	18.3	19.2	22	24.1	18.4	139.7	131.5	162.4	115.3	99.4	99.4	167.7	123.7	5.9	1.4	6.9	4.2	4.9	81.1	78.1	56.3	72.6	35.1	18.5	25.4	17.3	23.4	14	20.3	20.9	31.4	25.1	21.8	18	13.1	12.1	11	10.2	7.4	9.4
hsa-miR-548k	122.511	44.5	48.8	43.5	135.8	132.5	149.2	140.8	147	151.5	202.4	125.5	170.9	141.6	189.4	177	194.7	133.2	169.1	165.6	209.6	169.4	4.5	8.2	47.4	50.9	46.3	35.7	79.9	97.5	87.1	88.2	194	149.8	183.3	183.3	166.3	140.5	138.1	105.8	197.3	176.3	202.2	206.9	165.4	128.8	116.1	55.7	73.8
hsa-miR-574-3p	121.829	9.4	18.2	12.3	107.3	100.1	80.6	94.6	93.5	87.3	83.6	77.6	88	79.4	99.6	92.1	90.1	101.4	75	103	93.6	84	7.7	5	44	9.8	6.5	80	69	96.8	53.7	65.2	0	0	0.4	0	0	0	0	0	0	0.1	0	0	0	0	0	0	0
hsa-miR-374b-5p	121.461	68.2	76.5	83.7	103.7	107.2	73.2	74.4	84.2	83.8	57.5	86.5	69.8	76.9	100.5	106.5	103.1	91	102.4	84.6	96.7	109.1	295	73.5	628.3	112.5	132.6	165.9	145.2	160	124.9	115.2	73.6	78.4	81.3	77.3	74.3	79.1	77.6	90.8	97.8	67.4	54.8	44.8	52.2	61.4	62.5	59.2	61.2
hsa-miR-328-3p	118.689	33.2	27	25.7	55.7	57.1	38.3	32.1	45.2	39.1	36.1	41.5	32.1	45.7	28.4	30.8	39.5	22	34.2	26.2	35.6	42.4	3.5	1.9	4.5	3.3	4.5	98.2	102.5	85.4	72.7	71.2	43.6	59.2	53	46.9	44.7	54.4	47.5	56.9	43.2	52.7	45	39	54.1	49.6	45.9	47.7	52.1
hsa-miR-766-3p	115.629	78	91.6	86.9	56.7	50.3	78.5	55	52.4	70.9	52.2	46.3	57.6	54.5	71.8	78.6	68.4	66.3	58.8	51.8	91	94.8	15.7	4	14.7	3.7	6.1	56.8	48.8	55.8	45.1	61.1	170.2	254.5	173.3	170.1	176.3	178.4	183.9	251.1	190.9	225.9	226	176.4	150.4	154.5	160.8	122.1	122
hsa-miR-25-5p	113.288	14	15.5	13.1	24.7	27.4	104.4	163.9	140.2	140.5	117.1	146.9	107.2	110	178.7	154.6	119.1	111.3	178.8	81.2	142.3	117.4	110.6	237.5	93.3	156.5	193.7	1.8	9.2	11.8	11.2	8.9	154.1	147.6	160.7	202.7	211.7	190.1	140.9	143.1	130	153.2	151.7	157.4	191.3	157.6	131.1	82.7	82.5
hsa-miR-181c-3p	112.956	10.2	14.3	10.6	18.8	23.3	18.3	12.3	22.3	20.2	19.1	15.2	13	20.8	22.2	26.7	26.6	34.2	23.7	21.8	26.3	31.8	3.5	9.4	3.4	1.9	2.4	160.9	108.8	109.4	121.5	110.9	138	180.5	151.5	158.6	146	150.6	159.5	168.3	165.3	181.8	151.9	150.8	176.4	189.8	186.6	236.3	220.4
hsa-miR-29b-3p	112.617	440.8	454.8	538.6	14.3	9.4	14.8	17.1	13.2	16.2	13.6	13.6	16.5	20.8	17.3	16.9	19.1	16.4	11.6	11.8	18.1	25.5	18.6	74.3	276.1	37.2	77.8	254.9	245.5	260.5	225.6	200.6	41.5	55.3	43.5	49.2	48.4	39.5	38.8	43	43.7	68.3	46.6	37.9	33.2	33	29.8	14.9	23.1
hsa-miR-874-3p	110.224	34.7	32.5	42.2	115	103.8	45.8	45.9	52.4	53.4	46.4	39.7	46.1	42.7	46.2	41.5	47.6	45.1	36.1	47.4	46.9	39.1	2.3	2	5.5	0.6	4.2	49.8	95.3	96	71.3	86.8	174.1	204.5	169.1	184	183.1	177.8	201.6	292.4	226.8	215	158.3	115.5	119.2	99.4	71	42.8	69.6
hsa-miR-29b-3p	109.764	439.3	454.5	537.5	13.6	9.4	14.6	16.5	12.4	15.6	13.4	13.1	16.3	19.9	17	16.4	18.9	15.9	11.3	11.5	17.9	25.1	18.5	74.3	275.5	37.2	77.8	253.3	244.3	260.1	224.2	199.4	40.5	54.8	42.7	48.4	48.3	37.6	38.6	41.9	42.6	66.6	46	37.4	32.5	32.6	29.3	14.9	23.1
hsa-miR-7-5p	107.364	26.6	25.6	20.8	29.5	40.3	29.1	38.7	33.3	29.1	28.4	20.7	42.5	32.3	25.2	30.6	25.8	23.7	22.5	33	18.5	26.7	3.2	5.7	75.3	83.8	73.3	6.3	5.4	4	4.3	5.1	158.6	184.9	158.1	129	174	179.4	134.3	201.7	132.8	146.3	177.9	139.9	93	92.2	108.5	69.5	74.9
hsa-miR-450b-5p	106.083	1.9	4.8	2.2	39.5	43.5	40	33.1	34.5	33.9	38.4	26.8	37.7	35.6	60	54.1	64.6	26.3	44.8	30.8	56.5	60	1	1.5	4	5.2	4.7	38.1	29.5	20.3	27.8	33.4	301.3	282.9	244	280.3	242.9	224.2	167.8	194.9	329.7	318.5	132.1	134.9	208.3	201.2	158.9	73.9	110.3
hsa-miR-577	105.873	350.9	437.8	384.6	425.1	416.2	249.4	253.9	256.2	249.3	264.4	233.4	258	240.9	278	256.6	341.3	307	274.6	354.3	350.3	285.8	0.2	0.2	0.4	0.9	1	35.6	31.6	28.6	33.8	33	0	0	0	0.2	0	0	0	0	0.2	0	0	0	0	0	0	0.4	0.7
hsa-miR-1269b	102.97	0	0	0	372.8	371.3	263.2	267.3	267.7	267	266.8	283.3	224.4	264.9	488	480.7	494.4	418.5	591.1	452.3	537.9	481	0	0	0	0	0	0	0	0	0	0.2	0	0.1	0	0	0.2	0.2	0	0	0	0	0	0	0	0	0	0	0.3
hsa-miR-152-3p	102.215	11.9	19	32.1	95.4	112.3	104.1	103.4	140.7	105.5	100.9	99.7	82.6	106.4	102.5	114.8	121.9	107.7	117	92.9	113.9	104.6	302.9	708.3	340.6	305.8	340.1	102.6	96.3	103.2	96.5	90	8.3	11.8	10	12.9	10.4	8.6	8.6	10.5	12.3	12.1	5	4.9	6.6	6.7	7.4	4.6	11
hsa-miR-99a-5p	99.2788	11.7	18.6	15.4	1	0.6	0.2	0.2	0	0	0	0.2	0	0	0	0	0	0	0	0.2	0	0	7.9	11.8	20.8	21.6	35.1	81.8	131	121.7	76.8	104.9	219.5	195	176.1	200.9	173.3	175.8	159.4	231.9	233.8	197.8	110.7	76.4	102.8	129.5	138.5	89.7	122
hsa-miR-32-5p	98.4955	395.8	363.6	407.5	40.8	42.3	24.1	20.7	33.5	20.8	19.9	23.8	16.2	21.9	61.7	59.3	60	24.9	60.3	26.9	50.8	56	2	10	10.1	2.4	3.5	403.8	440.2	363.8	426.5	422.1	73.5	115.3	76.7	85.9	76.8	71.4	74	126.6	90.4	104.4	64.5	55.5	50.8	47.7	43.3	29.4	39.8
hsa-miR-7-5p	98.3015	25.5	25.3	19.7	28	38.8	25.9	36.4	31	28	25.4	19.8	40.3	29.9	22.9	29	25.3	22.9	21.9	30.6	17.6	25.8	3.2	5.8	74.5	83	72.4	5.9	5.2	4	4.3	5.3	150.2	172.8	145.4	116.7	157.3	167.4	125.8	192.3	122.2	134.6	162.9	127.8	84.4	85.1	102.5	64.9	70.3
hsa-miR-34c-5p	97.7742	0.8	1.2	0.6	161.6	171.6	280.9	309.7	279.1	346.8	330.2	306.9	270.4	336.8	374.2	304.4	341.9	275.4	282.4	317.2	313.4	339.8	4.1	9.1	19.3	29.1	30.2	5.2	5.2	4.7	6.5	4.2	0	0.5	11.8	0	0	0	0.4	0.4	0.5	0	0	0.3	0.2	0.1	0.2	0	0
hsa-miR-320b	97.3652	21.3	20.3	20.3	15	17.6	14.6	10.3	21.5	15.8	17.2	17.9	19.4	16	30.5	24.9	34.9	32.1	34	35	37.6	33.8	1037.4	2001	290.5	613.1	522.5	44.8	41.6	53.6	41	40.7	26.5	27.3	29.2	24.9	28.8	27.1	23.3	26.1	27.6	23.6	20.8	21.2	26.7	30.8	32.4	39	34.1
hsa-miR-7-5p	97.2894	25.1	24.9	19.4	27.8	37.8	25.8	35.4	30.7	27.6	25.4	20.1	39.9	28.9	22.7	29	24.8	22.4	20.9	30.1	17.5	25.5	3.2	5.7	74.4	82.8	72.3	5.9	5.2	4	4.3	5.1	147	170	142.2	114.6	155.7	164.8	123.2	190.6	118.7	132.9	160.3	125.4	83	83.5	100.4	63.9	67.4
hsa-miR-320b	95.9515	22.6	25.3	23.4	15.5	17.4	15.1	10.6	22.4	17.2	15.3	21.7	18.9	16.6	31.1	25.1	35.9	32	36.1	35.9	39	34.6	1037.4	2000.9	291.5	616.6	526.3	47.4	43.4	53.7	41.6	42.2	23.6	26.5	25.9	23	27.2	24.1	22	24	25.1	22.6	18.4	19.1	24.9	29.5	32.2	39	32.7
hsa-miR-191-3p	95.2818	1.9	0.8	1.7	89.9	94.7	189.9	196.4	116.6	170.9	197.2	152.1	185.4	136.2	285.2	301.4	259.3	271.5	241	316.8	289.4	235.9	4.8	6	6.1	4.4	6	6.7	7.1	7.1	9.1	10.2	84.9	80.2	89.5	82.3	70.3	90.8	67	46.8	78.8	82.1	38.8	41.3	63.6	77.3	88.4	100.2	86.1
hsa-miR-330-3p	94.6864	21.1	11.9	16.2	12.5	14.7	14.1	15.8	11.9	19.6	20.8	12.3	17.6	16.7	12.6	13.2	14.8	13.2	11.8	18.5	16	15.9	977	895	477.3	800	1079.9	22.3	17.4	17.9	23.1	18.6	51.9	40.6	51.2	50	41.1	46.3	52	49.4	53.7	50.3	27.8	26.5	36.9	34.2	43.6	21	32.7
hsa-miR-128-1-5p	94.6667	11.7	13.9	14.8	37.4	30.1	55.5	67.6	52.2	70.7	63.2	55.4	50.8	47.6	89.3	99.6	83.6	86.2	85.9	78.9	107.2	82.6	0.1	0.3	0.2	0.2	0.2	7.6	9.5	9.9	15.8	16.5	155.4	161	165.6	136.7	140.6	172.4	163.6	189.9	153.4	181.1	248.2	268.8	225.5	226.2	336.4	153.5	158.2
hsa-miR-18a-3p	92.9924	5.3	5.6	5.3	57.1	54.6	145.3	100.5	144.7	163.1	159	117.1	153.3	125.9	128.6	85.8	115.7	122.3	93.3	131.6	131.3	107.8	0.6	0.3	4.6	1.7	2	16.2	14.4	9	15.6	7.9	154.1	145	163.5	163.9	144.4	142.8	126.4	120.7	145.1	165.9	94.2	96.2	114.7	128.6	151.5	218.3	215.5
hsa-miR-877-5p	91.8727	12.1	9.9	8.9	21.1	22.5	30.1	18.7	21.3	36.4	25.1	17.7	48	30.4	21.5	15.6	25.2	21.3	17	34	45.1	29.2	151.8	128.6	8.7	9.6	6.7	8.8	10.8	13	21.3	21.9	124	210.8	193.9	149.9	136.1	152.2	135.3	113.9	139.9	181.9	108.5	106.5	155.3	188.1	226.5	460.1	326.8
hsa-miR-330-5p	91.7015	26	34.1	26	41.2	42.3	68.1	55.8	72.4	66.9	64.2	58.3	60.2	68.4	49.1	56.2	61.4	45.8	56.1	71.1	66.3	58.7	0.7	1.1	2	2.1	2.6	43.3	49.6	39.3	43.1	48.9	195.2	174.9	168.5	186.7	175.6	163.5	169.6	184.4	222.9	201.8	99.1	85.7	95.6	107.7	102.3	53.3	84.1
hsa-miR-92a-1-5p	90.7409	23.4	17.1	20.4	51.3	47.6	186.1	231.5	280.9	210.6	183.4	265.2	199	204.4	222.3	192.5	177.9	232.4	254.3	173	209.4	209.5	53.4	116.4	33.3	38.2	43.5	3.2	14	17.1	12.8	21.5	74.8	84.4	87.7	72.5	67.8	67.8	49	52.9	41.8	84.6	57	62.4	54.3	56.6	70.1	18.2	24.3
hsa-miR-30a-3p	90.5091	37.3	24.8	37.6	65.1	61.4	155.3	143	240.3	147.8	152.5	187.3	118.6	153.2	174.7	153.1	153.2	118.4	197.5	62.4	131.5	163.7	3.1	8	21.3	10.1	8.5	8.7	16.1	14.5	18.9	19.8	3.8	3.4	3.5	3.6	4.6	3.3	3.5	1.2	5.6	2.7	6.1	4.2	2.6	3.6	6.4	5.1	6.5
hsa-miR-338-3p	88.2364	24.5	38.1	13.1	18.1	15.6	22	24.8	27.5	21.2	19	24.1	15.9	19.7	33.9	37.2	32.9	15.9	25.4	19.1	25.5	30.8	4.3	7	55.9	4.9	5.2	193.6	199.2	194.4	183.3	165	0.5	0	1.2	0.4	0.9	0.9	0.7	1.1	0.3	0.6	0.6	0.7	0.8	0.5	0	0	0.3
hsa-miR-125b-2-3p	85.9379	2.6	2.8	1.7	0.3	0.3	0.2	0	0	0	0	0	0	0.4	0.2	0.1	0.1	0.2	0	0.2	0.1	0.1	0	0.7	0.4	0.3	0.9	19.1	22.5	16.6	20.3	19.6	145.5	159.7	144.6	186.3	190.3	173.1	179.1	212.5	179	195.6	285.2	274.4	201.1	184.4	202.3	120.2	149.2
hsa-miR-140-5p	85.7394	73.1	102.7	102.9	42.9	41.9	125.1	130.2	157.1	113.2	120.9	151.4	108.6	125	139.4	135	153.4	108.8	173.4	73	148.4	136.3	1.6	3.8	13.6	7.3	35.4	204.3	171.1	194.6	156.5	126.5	50.1	67.6	54.9	62	51.1	51.6	52.2	52.2	65.6	57.9	41.4	32	38	42.6	54.4	72.2	63.8
hsa-miR-424-5p	82.6076	2.3	2.8	3.4	28.9	25.2	20.3	20.9	28.3	23.4	19.7	23.6	27.6	24.5	39.9	37.2	44.6	30.4	30.5	30.2	34.8	44.1	33.9	8.8	250.8	36.5	43.5	70	76.3	77.5	68.2	52.5	131.7	161.2	146.4	153.6	133.3	111.3	98.9	156.4	154.2	193.8	135.9	95.2	120.1	113.7	94.3	75.3	83.2
hsa-miR-378a-5p	82.3864	19.6	19.4	28.2	36.5	33	67.1	70.5	80	72	73.3	77.2	62.3	61.3	91.5	84.3	95.8	84.7	87	65.9	82.1	80	0	0.2	2.3	0.9	0.9	23.3	33.5	46.6	37.4	47.1	47.7	83.4	53.2	60.1	57.9	57.8	49.6	66.8	55	77.6	63.9	44.6	50	49.1	46.1	34.7	40.1
hsa-miR-449c-5p	81.4591	1.5	2.8	1.1	44.8	49.9	195.7	124.7	183.3	190.6	120.2	137.4	121.3	302.7	181.4	111.4	119.6	85.4	122.3	94.7	142.9	224.7	1.7	0.7	0.2	0.2	0.3	2.7	4.4	3.8	2.8	4.8	3.7	4.2	3.1	8.3	9	7.5	3.9	5.1	5.3	4.2	4.8	5.6	6.1	10	11.1	9.5	8.1
hsa-miR-505-3p	78.9439	17.3	28.6	32.1	34.4	39	45.9	51	58.9	46.3	54.3	53.1	55.5	45.2	43.7	38.8	47.1	44.1	42.6	46.8	48.4	47.1	3.1	2	34.1	11.7	10.8	64.5	72.6	75.9	92.8	77.8	108.7	147.1	114.9	126.6	104.6	94.6	106.1	141	139.1	157.5	121.9	86.2	88.5	93.2	103.4	153.1	157.9
hsa-miR-1-3p	77.85	0.4	0	0	0	0	0	0	0	0	0.1	0	0	0	0	0	0	0	0	0	0	0	568	1074.2	1760.8	643.5	605.7	0	0.1	0.1	0	0	0	0	0	0	0	0	0.2	0	0.2	0	0	0	0.1	0.1	0	0	0
hsa-let-7b-3p	77.8121	16.2	17.5	19	257.7	234.2	217.1	228.8	226.9	201.4	194.4	230.9	172.1	192	321.3	288.9	306.7	400.1	300.5	301.2	287.3	264	2.9	0.3	10.3	1.1	1.2	39.2	31.1	44.3	33.7	34.9	0.2	0	0.6	0.4	0.2	0.4	0	0	0.4	0.2	0	0	0	0.1	0.4	0	0.3
hsa-miR-4677-3p	77.4682	30.2	30.1	36.6	105.1	118.6	99.8	144.6	125.7	131.5	120.6	116.2	129.9	122.3	161.5	176.5	161.6	117.8	194.8	106.7	172.7	152.7	0.1	0.1	0.7	1.1	0.5	40.2	34.7	24.6	37	33	62.1	70.5	63.3	67	68.2	71	62.2	68.5	64.3	68.9	122.7	110.9	79.4	78.3	94.3	85.5	84.8
hsa-miR-1-3p	77.4424	0.4	0	0	0	0	0	0	0	0	0.1	0	0	0	0	0	0	0	0	0	0	0	567.6	1073.9	1753.6	641	603.9	0	0.1	0.1	0	0	0	0	0	0	0	0	0.2	0	0.2	0	0	0	0.1	0.1	0	0	0
hsa-miR-126-3p	77.1303	34.3	10.3	15.7	67.7	72.4	162.3	175.1	143.6	168.1	178.7	136	196.6	149.3	254.5	238.1	210.4	202.3	201.9	218.4	197.4	183.8	6.1	11.5	23.4	16.3	16.2	198.9	158.6	180.5	191.1	163.4	29.2	33.3	29.1	29.5	23.1	32.4	26.7	32	26.4	34.9	17.8	16.5	22.4	24.2	21.6	15.8	20.4
hsa-miR-582-5p	75.8742	116.1	89.6	122.4	159.9	173.3	283.4	223.4	280.4	248.7	302.6	201.6	259.4	216.6	302.5	263.5	320.1	220.6	219.4	165.5	256.8	250.8	1.6	0.3	8.2	5.3	3.7	45.3	43.9	61.2	47	50.3	0	0	0.2	0	0.4	0.2	0	0	0	0	0	0	0	0	0	0	0
hsa-miR-1296-5p	74.6227	1.1	0.8	0.8	22.1	21.7	32.6	24.6	33.2	34.7	34	30	30.9	30.5	29.6	28.3	29.4	37.9	22.9	42.7	29.4	31.7	0.2	0	0.2	0.1	0	3.2	3.9	6.3	2.9	5.3	150.1	175.4	173.9	183.6	172.4	135.4	161	152.8	170	180.1	175.7	138.8	144.6	114.7	65.1	49.1	77.7
hsa-miR-93-3p	72.9273	4.9	8.7	8.7	56.5	54.7	80.8	87.9	70.6	82.7	71.4	58.8	88.7	67.8	67.1	71.4	68.8	61.1	48.8	59.7	74.4	59.5	0.1	0.7	3.9	1.5	1.1	15.5	13.7	21.1	11.6	12	141.5	130.3	129.1	134.9	139.7	128.5	126.7	155.3	151.1	131.9	103.5	97.2	82.6	71.1	51.4	66.9	66.3
hsa-miR-7977	72.5818	193	100.7	130.8	76.3	98.6	14.7	14.6	16.6	15.4	16.2	13.2	16.4	14.8	128	106.9	105.5	127	92.7	107.9	109	102.2	2.7	0.1	1.5	1.9	2	3.6	8.3	5.1	4.3	9.3	117.9	150.7	123.1	127.8	89.1	111.7	111.9	159.6	133.2	144.2	128.5	121.2	89.1	60.3	61.2	44.9	48.5
hsa-miR-33a-5p	71.1636	10.2	19.8	15.4	26.5	25.9	20.8	21.1	21.3	19.6	25.1	18.1	19.4	19.9	47.7	57	58.3	28.9	42	25	52.9	51.7	34.3	155.7	30.8	27.6	26.1	22.3	26.1	27.3	13.8	10.2	107.8	163.6	142.9	143.3	122.2	113.3	132.7	174.8	139.6	159.1	106.9	78.2	92.8	81.8	55.6	64.8	81.5
hsa-miR-576-5p	68.9379	102.2	108.7	106.8	30.9	25.4	40	42	45.2	42.9	48.3	45.6	39.3	41.2	43.6	49.9	47.4	36.9	48.8	51.8	47.6	43	8	1.2	53.8	6	8.7	53.3	46	35.7	47.7	40.8	151	126.9	143.1	136.7	105.5	125.3	106.5	97.6	145	134.4	93.3	95.2	109	94.4	70.6	59.9	66
hsa-miR-671-5p	68.8455	2.6	8.3	4.2	13.9	12.3	23.5	28.6	30.9	22.5	25.8	21.1	28.1	24.9	19.7	15.9	22.2	27.7	11.1	21.5	21.3	14.8	0.1	0.5	0.8	0	0	8.7	14.8	13.9	9.6	14.6	161.3	159.1	176.6	168.4	145.5	168.4	154.3	130.2	177.3	130.7	124.7	135.4	119	112.9	144.1	123.7	127.5
hsa-miR-98-3p	68.6833	0.8	6.3	2.8	111.4	112.4	53.1	53.6	57.6	59.5	50.8	47.5	75.6	59.4	76.4	71.6	75.5	45.1	76.3	60.2	109.3	83.1	12.3	1.1	19.3	5	2.8	47.8	40.1	35	29.3	29.4	123.1	128.2	115.9	109.1	97.8	105.1	95.8	92.2	121.6	114.3	74.5	62.1	72.1	71	64.5	30.1	50.5
hsa-miR-151b	68.1758	1096.2	1038.3	906.2	12.4	15	4.3	4.6	5.8	5.2	4	4.2	4.1	4.6	10.2	11.2	12	8.5	12.9	6.6	9.7	12.1	41.1	42.8	98.9	109.2	112.7	64	76.8	67.1	61.5	74.9	0.1	0.1	0.6	0	0.1	0.1	0.1	0	0.4	0.1	0.2	0.1	0	0.1	0	0	0
hsa-miR-3607-3p	67.0727	369.8	285.9	272.5	2.4	2.4	17.5	20.5	18.2	20	22	28.2	19.2	17.4	68.3	45.4	58.4	79.4	68.1	65.3	62.9	57.8	0	0	0	0	0	10.8	6.8	3.6	25.9	18.6	64.9	111.9	125.4	120.7	98.1	69.5	75.4	45.3	70.6	118.1	185.1	168.2	154.3	105.7	44	129.6	115.8
hsa-miR-590-3p	66.9242	62.6	72.2	86.1	73	91.4	68.9	59.5	60.2	59.3	64.6	53.4	62.7	61.5	123.1	107.8	121.5	52.4	98.5	45.2	115.7	94.9	5.3	4.4	15.9	14.1	14.2	98.5	91.3	113	77.9	66.3	81.3	111.9	79.8	83.7	78.4	69.3	76.8	65.1	98.3	82.5	71.3	66.1	58.2	45.8	39.4	17.2	28.8
hsa-miR-324-5p	66.4667	24.9	22.6	22.1	22.3	31.2	26.6	24.8	33	29	17.1	34.5	37.2	31.5	25.9	30.3	40.9	26.6	29	35.4	33.7	42.7	8.8	14.6	29.9	2.2	6.7	29.1	27.3	33	35.1	28.2	76.1	123	96.3	92.2	78.4	86.3	107	138.8	105.1	118.9	88.9	67.6	64.3	73.3	81.7	94.3	95.8
hsa-miR-335-3p	66.0212	104	145.5	183.1	290.9	329.9	152.9	171.4	111.6	166.9	162.3	112.4	124.1	161.7	242.1	256.6	224.9	233.9	167.9	291.7	213	250.6	0.3	1.9	3	2.4	2.6	51.5	34.2	34.8	33.6	33.4	0.3	1.6	0.2	1	1.6	1.5	0.5	0.2	1.1	0.8	0.8	0.3	0	0.4	0.2	0	0.7
hsa-miR-4521	65.2348	3.4	4	2	3.4	2.2	29.8	39.2	47.8	37.2	80.1	47	77.3	47.2	19.8	14.5	14.3	27.5	17	23.7	12	15.5	0.1	1	1.7	12.7	7.8	2.2	8.5	17.8	2	13.9	136.1	171.2	145.6	106.6	77	112.3	96.3	133	164.8	151	119.5	93.4	56.6	57.9	76.9	14.4	15.9
hsa-miR-26b-3p	64.9409	48.3	52.7	45	35.6	34.3	56.9	70.9	79.7	65	56	78.8	58.5	60.9	100.4	86	95.9	90.5	106.5	66.2	90.5	98.9	0.6	0.5	1.8	0.7	0.7	144.6	113.6	82.3	195	159.8	59.5	68.4	67.2	64.6	59.7	57.8	58.3	44.3	57.6	76.2	54	41.7	55.4	65.4	65.3	96	64.1
hsa-miR-132-3p	64.5591	17.7	24.2	15.9	7.5	9.9	30.4	28.8	36.3	30.7	11.5	36.6	14.3	30.5	33.6	43.9	42.9	14.9	50.8	10.6	34.4	39.9	3.2	2.8	14.9	1.6	1.5	137.4	123.3	150	154.1	162.3	30.5	31.7	24.1	38.8	36.2	30.1	28.1	31.6	30.8	30.4	22.2	22.5	30.7	42.5	39.4	83.4	81.5
hsa-miR-542-3p	63.9939	0.4	2.4	0.3	16.1	17	14.2	11.2	13.5	13	11.7	10	11.9	16.5	18.7	18.8	19.6	12.8	15.1	16.3	21.1	20.6	1.1	1.1	7.2	7.2	6.8	19.4	12.3	19.3	15.6	14	120.4	150	133.9	135.9	153.5	145.4	126	160.7	123.2	131.2	191.8	161.7	135.4	139.8	175.1	120.5	122
hsa-miR-223-5p	63.847	85.2	54.7	58.7	47.8	50.3	168.1	159.6	180.2	239.4	200.5	197.1	277.4	167.5	98.2	88.5	99.6	171.8	121.2	125.2	125.2	103.5	74.3	182.4	238.1	318.1	72.6	128.6	86.4	102.5	81.1	68.4	0	0	0	0	0	0	0	0	0	0	0	0.2	0	0	0	0	0
hsa-miR-625-5p	61.8682	24.9	28.2	22.1	16.3	22.3	27.6	34.1	47	40.2	37.2	41.3	40	41.2	46.2	45.2	46.2	51.2	53.8	51.7	42.5	45.5	14.3	22.4	25.5	9.1	12.5	25.7	17.3	17.9	19.8	17.5	79.2	63.4	76.7	80.9	83.6	60.8	71.9	44.5	83.5	70.6	53.2	56.8	62.7	51.5	42	43.8	52.4
hsa-let-7f-2-3p	61.0167	12.1	11.5	16.8	28	24.9	36.2	35	45.4	34.7	35.7	41.4	30.2	38.5	58.2	41.2	48.8	41.9	47.9	28.6	50.1	46.7	0	0	0.4	0.1	0.2	34.5	28.1	23.7	28.1	28.3	117	107.7	109.3	121.2	116.5	112.3	100.3	87	115.4	141.6	100.9	86.9	98	92.6	69.9	30.5	48.2
hsa-let-7f-1-3p	60.8924	5.7	7.1	8.9	53.1	55.4	57.8	63.9	62.3	59.3	53.9	51.3	53.4	49.1	92.6	73.5	83.4	93.2	67.5	63.5	79.6	65.1	0.9	0	8.6	0.9	0.4	27.9	21.2	19.6	16	19	90.5	115.6	94.3	104.2	105.8	88	81.2	84.6	99.2	103.5	69.9	58.6	61.6	57.8	60.5	37.8	36.2
hsa-let-7a-3p	60.5545	15.8	20	21.9	150.7	167.6	122	125.3	124.4	124.7	116.1	126.4	119.6	116.3	173.1	168.3	174.1	113.3	155.5	104.9	155.7	149.9	0.5	0.5	8.3	3.1	0.8	43.6	31.6	28.8	31.8	29.4	43.5	44	35.4	43.7	35.9	33.6	31.6	36.4	52.5	44.4	36.1	23.2	28.8	27.5	26.8	14.5	18.1
hsa-let-7a-3p	60.2758	15.8	20	21.9	149.1	166.6	121.5	124.5	123.6	122.8	115.9	125.1	118.5	115.3	171.7	167.4	173.3	112.9	154.9	104.2	155	149.1	0.5	0.4	8.2	3.1	0.8	43.3	31.6	28.8	31.8	29.4	43.5	44	35.4	43.7	35.9	33.6	31.6	36.4	52.5	44.4	36.1	23.2	28.8	27.5	26.8	14.5	18.1
hsa-miR-324-3p	60.203	12.8	9.5	8.9	13.3	11.9	10.4	11.6	11.9	10.7	14.3	8.2	15.7	9.2	19.7	20	20.5	23.2	20.4	35.7	32	22.3	8.6	6.5	20.5	4.4	5.9	17	19.9	11.7	20.4	20	83.7	116.9	102.7	106.9	106.2	99.5	116.5	115.4	103.5	102.6	99.1	86.6	95.5	90.8	83.8	106.9	120.4
hsa-miR-454-5p	60.2015	7.2	9.9	5.6	33.5	31.3	48.4	46.9	36.3	50.7	55.7	43.8	66.5	44	58.3	51.2	51.2	40	57.4	63.2	63.5	48.5	0.9	0.8	1.3	1.1	0.7	16.8	8.9	9.7	14.1	10.3	137.3	108.3	120.9	109.9	144	138.3	97.9	60.2	76.6	101.9	135.1	129.5	138.1	117.2	93.9	55.4	58.2
hsa-miR-5701	59.9636	86.2	75.2	65.6	1.6	1.5	4.2	3.3	4.5	4.1	4.5	4.8	5.2	4.4	29.2	21.8	27	46.3	34.5	33	26.3	30	0	0	0	0	0	4	5.7	3.7	12.6	14.6	80.3	141.3	138.7	172.3	122.3	102.9	101	64	91.8	141.4	261.3	265.6	198.3	130.1	48.1	95.2	104.1
hsa-miR-5701	59.9636	86.2	75.2	65.6	1.6	1.5	4.2	3.3	4.5	4.1	4.5	4.8	5.2	4.4	29.2	21.8	27	46.3	34.5	33	26.3	30	0	0	0	0	0	4	5.7	3.7	12.6	14.6	80.3	141.3	138.7	172.3	122.3	102.9	101	64	91.8	141.4	261.3	265.6	198.3	130.1	48.1	95.2	104.1
hsa-miR-5701	59.9636	86.2	75.2	65.6	1.6	1.5	4.2	3.3	4.5	4.1	4.5	4.8	5.2	4.4	29.2	21.8	27	46.3	34.5	33	26.3	30	0	0	0	0	0	4	5.7	3.7	12.6	14.6	80.3	141.3	138.7	172.3	122.3	102.9	101	64	91.8	141.4	261.3	265.6	198.3	130.1	48.1	95.2	104.1
hsa-miR-194-5p	59.3076	59.2	60.5	69.9	6.4	6.7	7.3	7.6	8.1	7.9	6	8.6	6.3	6.7	7.5	6	7.1	7.6	6.6	9.5	8.6	8.1	2.8	2.9	11.7	3.3	5.4	161.5	133.2	121.3	148.8	141.5	104.7	116.1	98.6	113.5	99.2	98.5	104.8	134.2	115	102	45.9	43	60.1	86.5	93.9	93.9	104.7
hsa-miR-1285-3p	58.5212	6	6.5	5.3	11.6	16.7	54	54.2	68.5	61.1	63.4	62.1	50.6	51.6	78.1	85.3	88.1	106.4	91	84.2	102.2	82.3	27.4	21.7	21.5	32	36.6	34.6	29.1	26.4	48.5	42	59.9	75.1	84.1	80.7	70.3	60.3	65.8	45	63.9	85.6	40.4	53.2	76.6	96.1	122.6	215.5	161.5
hsa-miR-641	58.0652	10.2	18.2	12.3	17.3	18.4	31.6	27.8	34.8	38.5	57.4	32	25.8	29	24.9	17.6	23.9	40.8	21	38.9	23.7	18.8	2.4	6.9	6.1	7.4	9.2	10.5	9.2	8.5	7.3	9.8	114.7	108.5	118.6	113.8	126.6	112.5	111.9	83.4	114.1	126.8	148.5	139.6	121.2	102.5	67.9	56.8	59.9
hsa-miR-664a-3p	57.2652	235.6	218.5	296	68	67	61.6	64.4	91.1	64.6	49.2	89.5	61.1	88.6	55.1	62	66.4	57	74.8	46.1	54.1	80	37	8.9	89.2	15.5	23.6	168	144.6	167.2	156.6	169.2	6.8	8.7	11.6	11.4	7.2	7.9	6.7	8	13.1	10.5	8.8	9.3	10.2	10.1	8.7	6.7	7.1
hsa-miR-629-5p	57.2242	69	122.5	95.9	23.6	24.7	14.5	14.8	17.9	21.5	16.4	18.4	11	15.6	20	23.7	23.8	20.7	26.9	26.9	21	19.9	10.3	12	9.3	8.2	7.3	19.7	16.1	23.5	13.6	18.9	96	79.2	83.3	71.3	82.2	89.5	91.7	89	68.7	72.2	117.9	100.9	80	61.4	54.9	29.1	36.9
hsa-miR-1249-3p	56.9561	3	2.4	3.4	63.3	62	80.6	104.4	105.7	96.2	68.2	112.6	89.2	88.8	107.3	97.6	118.4	47.8	107.4	45.5	139.4	135.4	0.8	0.1	1.4	0.8	0.1	17.5	15	14.4	21.1	28.1	11.2	12.3	12.2	13.2	9	11.1	7.6	6.4	10	14.9	12.2	10	11.9	10.8	12.6	13.3	15.2
hsa-miR-27a-5p	54.8803	32.4	50.4	75.2	136.2	168.2	74	71.9	94.8	62.5	64.2	98.8	50.1	61.6	109.1	107.6	84	98.9	127.3	64.2	86.5	81	0.5	0.7	6.5	6	8	99.3	103.1	183.5	73.4	215.5	6	6.8	5.2	6.1	9.7	8.1	6.2	8.4	4.4	5.3	7.6	4.1	4.9	6.1	6.7	16.5	16.5
hsa-miR-625-3p	54.2924	69	61.9	52.8	17.3	18.6	52.2	51	77.4	51.3	58.8	59.3	51.3	49.6	37.8	30.4	44.5	61.1	57.6	45.8	45.1	43.7	23.1	23.8	9.5	10.6	13.4	16.4	12.6	14.4	11.4	11	60.8	51.6	66.8	58.1	65.1	58	55.2	28.4	51	45.1	215	145.2	73.4	42.6	21.8	17.9	18.4
hsa-miR-24-2-5p	53.5818	6	14.7	14.8	130.8	123.9	89.2	76.2	73.2	79.3	64.2	77.2	73	74.2	57.9	61.9	50.8	50.2	55.7	46	47.9	54.3	5.3	8	16.9	22.7	20.2	93.6	80.3	102.5	94.8	98.8	2.9	5.5	3.1	2.2	2.9	3	1.9	5.2	3.6	4.7	2.6	3.3	1.6	1.9	1.7	5.6	1.6
hsa-miR-1303	52.5561	0.4	1.2	1.1	58.6	65.7	94.2	99.1	84.1	80.6	108.9	56.8	100.7	82.4	102.2	95.3	82.6	106.6	59.2	124.2	81.2	80.8	0.2	0.3	0.9	1.7	0.7	4.4	23.8	19	24.4	22.7	67.2	71.3	64.6	51.8	51.5	52.4	71.5	52.8	72.4	75.6	53	53.1	64.4	70.8	72.1	83.4	101.3
hsa-miR-7-1-3p	50.65	101	91.2	90.3	20.6	22.6	17	24.8	34	26.9	28.3	56.1	22.2	23	41.1	30.5	39.9	32.8	86.1	28	35.2	32.8	7.3	6.9	109.2	14.3	21.4	74	61.3	69.6	55	54.9	50.8	69.7	55.9	63.6	56.9	50.5	68.2	88.3	67	63.1	40.2	42.1	37.7	35.1	38.1	28	34.6
hsa-miR-4454	49.8636	26	17.8	26.3	46.8	45.5	11.2	10	13.9	9.2	16	7.5	17	11	72.1	66.8	63.8	101.2	52.6	81.9	60.4	56.9	4.9	1.4	10.9	3	3.5	4.5	3.1	8.1	3.6	7.1	36	63.4	41.5	47.3	34.4	42	36.6	61.5	47.5	111.8	99.9	60.4	21.6	20.1	26.1	20.3	28.5
hsa-miR-193b-3p	49.4621	15.8	32.1	20.7	0.5	0.6	0.3	0.4	0.8	0.6	0	0.7	0	0.8	0.3	0.7	0.4	1.2	0.6	1	0.3	0.8	0	0.2	1.4	0.2	0.6	12.4	14.2	19.1	10.5	15.4	48.4	66.1	53.8	62	47.9	41.1	51.8	48.1	67.6	66.3	58.4	45.4	44.1	42	43.8	35.7	36.9
hsa-miR-362-5p	49.2712	21.5	21.8	20.7	118.6	102	73.7	85.9	102.3	97	70.7	104.9	102.3	75.3	65.2	64.1	60.6	67.5	55.1	82	72.5	73.9	1.4	1.8	15.1	6	6.5	39.2	33.8	40.8	30.6	36.2	40.9	53.2	42.3	41.6	28.5	37.9	33.7	59.7	41.5	47.7	49.8	37.1	28.5	26.7	36.4	21.7	20.1
hsa-miR-3176	47.9379	1.9	0	3.1	50.4	48.8	46.9	56.9	56.6	57.7	51.3	45.4	71.4	51.7	54.2	61.9	62.3	57.2	49.6	93.2	84.6	58.2	0.2	0.6	0.8	0.7	0	9	8.9	12.1	9.1	10	75	69.7	76.7	75.2	77.1	82.1	95.9	78.9	75.1	78.3	49.6	50.6	59.5	75.4	79.7	64.5	73.1
hsa-let-7i-3p	46.2379	409	314.9	400.8	10.3	11.1	10.3	13.4	14.3	11.4	10.8	12.7	13.1	13.7	16.9	19.7	23.3	21.2	12.2	14.4	17.1	16	1.6	1.4	3.3	1.7	3.3	76.8	118	94.1	108.5	108.1	30.7	45.1	35.1	34.5	31.6	29.4	31.6	40.8	36.5	39.5	35.6	25	23.6	21.4	19.1	15.8	17.8
hsa-miR-532-3p	46.053	14	21	15.7	23.2	22.8	49.6	45.3	50.9	48.8	42.2	57	47.1	51.9	58.3	52.3	59.2	42.4	54.2	37.9	60.5	55.6	28.9	8.2	33.3	8.5	11	24.4	30.8	38.2	32.4	34.1	26.6	39.1	28.1	32.3	32.1	20.9	35.1	38.7	38.7	41.3	35.4	25.5	31.8	33.4	35	34.3	34.6
hsa-miR-3909	45.7667	1.9	2.4	1.4	8.2	8.7	13.6	14.2	14.5	12.8	11.9	11.6	13.1	14.6	14	17.4	12.7	14.3	16.2	13.9	15.9	13.5	1.5	1.7	2.2	6.5	6.6	14.5	16.8	16	14.3	20.9	95.6	91.5	94.5	101.2	112.6	111.5	99.6	94.5	87.6	89.6	107.5	111.1	97.7	78.2	49	32.2	43.4
hsa-miR-150-3p	45.7318	214.9	200.3	206.5	0	0	0	0	0	0	0	0	0	0	0	0	0	0	0	0	0	0	70.9	210.8	181.8	95.8	68.3	131.1	177.7	143.6	144.1	178.2	5.4	5	5	6.5	7.2	7.7	3.9	6.2	5	3.7	2.6	2.6	4.5	5.6	6.8	2.8	2.3
hsa-miR-1301-3p	44.6273	9.4	11.1	11.7	25.6	33.1	33.1	28.6	30.6	30.3	33	30	31.1	31.3	22.7	30	28.1	29.5	25.6	40.5	34.5	23.4	118	178.2	117.3	137	154.5	17.6	10.7	15.1	13.6	22	46.9	42.2	46	38.6	37.5	35.8	28.3	39.1	51.5	45.9	39.2	32.3	34.7	34.4	32.7	24.5	28.2
hsa-miR-589-3p	44.1955	2.3	4.4	3.1	61.4	69.3	130.7	127.9	120.7	127.9	123.2	99.4	118.5	118.4	101	100.6	114.8	107.9	75.8	89.1	120.8	94.6	8.6	1.9	8.2	3.3	4.8	18.3	12.7	17.8	27.7	26.8	27.6	25.2	31.1	27	19.6	23.7	21.6	15.7	31.4	31.4	13	14.9	25.1	27.3	33.7	63.8	52.4
hsa-miR-378i	43.5061	42	48.6	56.7	21.3	23.8	40.5	45.6	64.9	48.1	47.1	63.1	35.6	43.2	66.1	63	61	61.6	86.8	48.2	57.9	60	0.7	0.7	5.1	5.5	6.5	67.3	53.8	61.3	58.4	57.2	39.5	50.9	41.4	47	47.1	43.2	44.8	51.5	42.1	38.3	42.9	41	49.8	48	49	55.5	47.9
hsa-miR-1285-3p	43.3833	5.7	5.4	4.8	9.8	13	40.3	44.3	49.3	48.7	47.4	48	38.9	41.1	67.2	73.1	75.1	89.6	78.8	69.9	90.3	70.3	26	21	18.8	28.4	31.9	28.3	25.4	20.7	37.8	36.1	40	49.7	54.1	52.7	46.3	41.4	44.6	33.8	43.9	55	25.2	33.8	47.5	64.7	89.7	151	106.8
hsa-miR-96-5p	43.2409	11.3	14.3	12.6	175.2	135.4	75.2	73.1	81.5	81.8	85	81.7	74.7	69.5	73.5	51.9	68.5	31.6	61.1	27.5	64.7	51.5	1.4	1.1	5.3	0.9	1.3	1.6	1.7	0.8	1.1	0	44.9	43.5	41.5	35.3	21	32.4	13.9	32.6	36.7	46.6	27.8	21.4	21.5	20.9	34.6	29.8	28.8
hsa-miR-20b-5p	42.4288	103.7	68.4	126.5	31.5	34	58	48.9	54.1	52.8	55.2	42.4	47.3	55.4	58.4	54.1	52.5	56.5	37.8	61.2	65.6	53.3	1.9	2.7	14.9	2.5	3.6	45.6	45.1	61.9	39.9	48.9	4	7.1	3.6	4.1	3.4	3.7	3.6	4.6	4.3	5.2	3.6	2.9	2.4	2.8	2.3	0.8	1.8
hsa-miR-598-3p	42.347	105.9	87.6	114.3	58.8	54.9	62	63.6	80.2	70.7	60.2	75.6	74.4	76.3	79.2	87.7	99.1	57	91.8	68	98.5	104.1	72.7	82.1	128	33.1	54.1	77	80.6	78.3	65.8	60.6	0	0	0	0	0	0	0.2	0	0	0	0	0	0	0	0	0	0
hsa-miR-378d	41.8742	28	38.6	49.5	12.6	14.7	6.9	5	7.8	5.3	8	6.3	6.1	4.6	23.2	22.4	24.4	18.7	23.5	18.9	22.8	21.7	53.9	57.3	365.7	525.7	325.7	26.3	19.2	20.1	16.8	14.2	15.8	23.4	18	21.2	16.9	14.6	18.9	21.4	20.3	17.6	18	17	16.6	17.3	14.7	18.5	20
hsa-miR-194-5p	40.9561	47.5	52.5	55.9	5.4	6.1	6.6	6.6	9.1	6.6	6.2	7.3	4	4.7	6.1	6.4	7	5.9	7	9	7.8	6.9	2.5	2.7	9.6	2.6	5	147.4	118	106.8	132.8	124.4	54.8	67.4	56.3	68.8	60.6	54.4	62.5	77.4	70.8	61.2	24.9	25.6	36.1	52.3	62.3	63.4	79.8
hsa-miR-942-5p	40.8727	10.9	10.7	11.2	33.7	40.9	40.5	48.9	43.4	49.9	60.4	47.2	49.9	46.3	52.8	49.8	47.3	47.6	60.9	42.7	48.7	48.6	4.8	2.5	9.9	4.2	6.6	19.7	17.3	9.6	14.2	12	70.6	57.4	62.1	53.4	63.1	65.4	53.4	51.4	63.1	56.9	39.2	40.7	51.7	41.4	36.3	34.7	33.7
hsa-miR-548e-3p	40.6591	56.9	70.6	60.7	57.9	59.2	67.4	64.8	58.4	62.9	90.9	55.4	70.7	63.7	83.2	73.2	86.4	50.4	78.8	60.1	82	69.3	11.6	29	54.8	80.5	64.8	45	33.1	31.8	23.1	19.5	43.3	30.2	35.1	35.1	30.7	34.5	18.5	18.5	41.1	35.1	35.6	32.5	25.3	21.4	17.6	7.7	10
hsa-miR-424-3p	38.3667	1.9	1.2	0.6	5.7	4.7	11.7	12.8	14.8	15.4	12.2	17	11.7	15.4	20	16.2	15.2	22.5	24	18.7	17.1	19.5	33.6	26.2	62	56.7	64.3	36.6	28	20.1	24.1	26.6	45.1	43.8	48.7	53	58.8	51.2	50.4	38.5	40.4	44.2	33.4	39.5	59	63.2	55.3	39.2	43.7
hsa-miR-33b-5p	38.2	8.3	6.7	10.1	5.3	5.9	5.1	4.7	4.7	5.2	8.7	8.3	9.1	4.1	24.3	26.5	22	17.4	27.3	24.5	22.5	27.5	0	0.3	0.7	0	0	45.7	44.5	37.3	50.8	38.4	68.5	90.7	82.3	104.3	69.6	80.3	81.5	91.8	87.7	96.1	56.2	42.7	63.5	59.4	38.2	48.4	64.1
hsa-miR-10b-5p	38.1939	274.6	164.4	179.6	3.4	6.6	0.5	0.6	1	1.4	1.2	1.8	0.5	1.3	0.8	0.5	1.9	2.1	1.4	2.1	1	1.4	0.5	0.2	0.4	0.2	0.3	84.7	89.2	101.5	97.9	101.5	16.3	18.6	75.3	41.6	31.8	27.2	13.8	22.2	18.1	33.4	50.4	53	121.4	113.8	111.5	46.3	29.5
hsa-miR-133a-3p	38.1424	3.2	0.6	0.1	0	0	0.1	0	0	0	0	0	0	0	0.1	0.1	0	0	0	0.1	0	0	0.7	0.5	2.7	0.2	0.2	3	3	1.6	3.4	5	0.1	0	0.1	0.2	0.4	0.1	0.4	0.3	0.4	0.2	0.2	0.1	0	0.1	0.1	0.5	0.5
hsa-miR-133a-3p	38.1424	3.2	0.6	0.1	0	0	0.1	0	0	0	0	0	0	0	0.1	0.1	0	0	0	0.1	0	0	0.7	0.5	2.7	0.2	0.2	3	3	1.6	3.4	5	0.1	0	0.1	0.2	0.4	0.1	0.4	0.3	0.4	0.2	0.2	0.1	0	0.1	0.1	0.5	0.5
hsa-miR-188-5p	37.3439	0.8	0.8	0.8	16.9	17.5	40.7	38.2	36.6	39.6	39.8	27.7	42.8	35	41.6	49.1	56.2	43.5	34	42.8	59.8	51.6	0.8	1.5	0.7	0	0.2	12.5	20.2	17.6	32.8	33.8	44.5	68.7	64.6	59.9	45.4	42.6	52.5	51.6	64	73.5	33.4	23.5	44.1	53.7	82.5	177.3	151.1
hsa-miR-193a-3p	37.2258	1.9	1.2	2.5	20.2	20	42.1	58.3	44.7	45.9	54.6	40	50.1	51.5	55.7	63.8	70.4	54.8	48.7	40.1	63.9	64.6	4.3	6.3	27.8	11.4	8.1	15.3	15.2	10	21.6	14.6	11.5	26.7	26.2	24.2	18.5	13.2	14.8	6.7	18.3	24.1	6.8	9.3	14.2	19	12.4	19.3	23.6
hsa-miR-31-5p	36.5439	2.6	4.8	2	0.1	0	0	0	0	0	0	0	0	0	0	0	0	0	0	0	0	0	46.5	43.4	35.9	74.3	133.1	278.2	240.5	276.1	234.1	226.1	1.1	2.9	19.6	1.4	1.6	1.3	1.2	1.1	1.1	0.6	1	0.8	2.2	2.2	2	8.4	2.9
hsa-miR-378d	35.6409	24.7	34.1	43.6	11.9	13.9	4.9	3.8	5.8	3.5	6.4	4.8	4.9	3.5	21	20	22.8	16.2	20.5	16.8	21.2	20.5	53.7	56.9	365	524.7	325	19.4	16	17.5	14.3	11.5	14.3	21.6	14.4	19.5	14.6	13.1	17.3	19.3	18.3	15.9	16.2	14.1	14.1	15.5	12.9	17.1	17.4
hsa-miR-4746-5p	35.5015	0.4	0.8	2.2	36.8	37.5	40.8	40	31.7	38.1	48.5	34.3	37.2	34.8	38.1	39.2	37.8	47	30.3	45	38.8	33.7	0	0.3	0.2	0.5	0.1	2.7	3.4	2.6	4.1	3.2	53.7	43.8	45.6	48.3	56.9	59	53.2	49.9	47.5	37.7	28.8	30.7	49.5	61.6	88	90.1	91.3
hsa-miR-210-5p	35.1576	3.4	4	3.9	4.1	4.1	35.9	91	23.4	64	16.4	42	14.1	57.3	66.5	85.2	71.3	28.2	61.3	22	60.9	42.4	0.1	0.3	0.2	0	0.3	0.9	0.2	1	0.2	0.2	12.5	10.5	10.5	13.2	9.7	15.6	13.7	9.7	8.3	24.1	16.8	10.3	8.1	10	11.1	7.7	6.8
hsa-miR-4326	34.5333	1.5	4	2.2	10.8	11.4	39.8	47.5	37.9	33.5	51.3	35.4	59	37.5	25.8	28.2	29.1	35	32.2	46.5	36.4	23.7	0	0.2	1.3	1	0.9	4.3	2.8	4.2	4.7	5	65.5	67.4	71.2	69.3	62.8	66.1	55.2	51.3	56	68.7	75.5	75.6	63	62.7	54.7	40.3	40.5
hsa-miR-128-2-5p	33.9167	0	0	0	0.2	0	0	0	0	0	0	0	0.5	0	0	0	0	0	0	0	0	0	0	0	0.1	0	0	0	0	0	0	0	97.8	82.3	89.9	70.5	70.7	101.9	83.5	90.5	82.9	96.9	70.3	68.8	59.8	60.6	77.9	10.2	11.7
hsa-miR-4792	33.7061	0	0	0	0.3	1.3	0.7	0.4	1	1.1	0.7	1.6	2.1	0.4	1.1	1.4	2.2	5.8	4.6	4.6	2.1	1.9	0	0	0	0	0	194	253	224.8	192.3	200.1	3.2	15.7	3.5	17.9	18.1	15.6	12.7	15	39.8	4.6	16.8	4.4	14.5	19.6	11.8	89.7	121
hsa-miR-335-5p	33.2848	43	63.5	86.1	30.3	33.4	54.5	52.4	47.8	53	60.7	45.4	48.5	54	62.6	57.2	58.4	51.6	52.3	42.4	55.1	51.9	49.8	43.5	135.9	198.5	215.6	92.9	77.2	80.8	86.6	68.4	0.2	0.3	0	0	0	0.4	0	0	0.2	0.1	0	0	0	0	0	0.4	0
hsa-miR-200c-3p	33.197	52.6	52.7	55.9	7.3	7.9	12.2	12	13.8	7.6	8	12.7	5.9	11.1	11.1	10.8	9.9	15.4	11.8	14.2	10.8	7.7	9.9	9.7	13.7	6.2	8.9	10.8	25.7	27.1	22.4	22.4	48	57.4	52.7	41.8	45.9	52	48.3	71.6	49	47.3	44.8	35.1	32.9	35.6	35.5	29.8	34.6
hsa-miR-548o-3p	33.0773	5.5	6.9	8.3	15	16.1	10.7	11.1	11.9	10.4	16.4	12.3	9.8	10.3	19.1	18.6	20.2	17.5	17.8	21.6	18.8	17.4	0.4	0.5	2.4	2.5	3	19.4	17.5	15.9	17.3	14.5	86.7	70.9	77	87.5	54.9	73.4	47.5	62.3	93.5	79.5	43.9	44.5	45.2	46.4	45.3	26.7	31.7
hsa-miR-548o-3p	33.0773	5.5	6.9	8.3	15	16.1	10.7	11.1	11.8	10.4	16.4	12.3	9.8	10.3	19.1	18.6	20.2	17.5	17.8	21.6	18.9	17.4	0.4	0.5	2.4	2.5	3	19.4	17.5	15.9	17.3	14.5	86.7	70.9	77	87.5	54.9	73.4	47.4	62.3	93.5	79.5	43.9	44.5	45.2	46.4	45.3	26.7	31.7
hsa-miR-4433b-3p	32.647	0.4	0	0.6	0	0	0	0	0	0	0	0	0	0	0	0	0	0	0	0	0	0	778.9	925.8	178.8	146	115	0.5	2.2	1.4	2.2	2.4	0	0	0	0	0	0	0	0	0	0	0	0	0	0	0	0	0
hsa-miR-502-3p	32.1803	17.9	25.6	24.2	23.1	22.5	24	24.1	28.3	26.1	35.4	22	24.5	28.1	37.3	31	41.2	28.2	33.5	29.2	32.6	33	2.1	4	15.3	14.1	13.9	19.5	22.5	25.8	17.3	18.1	37.6	35.1	37.9	36.4	33.6	35.9	30.3	30.6	38.3	37.3	31.4	26.5	30.3	24.6	18.1	11.9	18.6
hsa-miR-449a	31.9288	2.6	6.3	4.2	27.8	34.6	54	41.2	79.1	65.8	34.8	52.9	37.3	99.9	105.1	64	77.3	30.7	92.3	42.3	75.8	117.9	0.1	0.1	0.1	0	0	1.3	1.7	2.1	2	1.8	2	2.9	1.9	2.8	3.2	4.5	2.3	2.6	1.1	2.6	2	1.1	4.5	2.6	3.3	0.7	1
hsa-miR-584-5p	31.3091	15.1	11.9	4.5	52.8	52.2	35.4	26.4	29.3	35.5	59	27.5	56	36.2	57.3	42.3	61.8	93.7	45.4	94.8	76.6	66.3	245.1	363.3	18.4	5.8	6.6	98.2	84.2	55.5	107.5	80.3	0	0	0	0	0	0	0	0	0	0	0	0	0	0	0	0	0
hsa-miR-6503-3p	31.1227	0.4	3.6	3.4	84.1	75.2	91.6	75.1	61.3	77.4	71.2	71.5	63.2	88.6	92.9	101.2	125.3	66.1	97.7	66.9	159.8	111.1	18.1	44.7	40.3	101.3	52.9	36.4	36.6	37	54.2	41.3	0	0	0	0	0	0	0	0	0	0	0	0	0	0	0	0	0
hsa-miR-106a-5p	30.8182	28.1	28.6	41.2	15.8	14.7	48.9	44.3	46.6	53.3	50.6	37.8	50.5	51.6	54.6	58.1	54.8	60.2	44.3	63.8	54.4	61.6	4.5	3.3	52.9	3.7	7.4	22.9	21.8	27.3	17.5	21.2	11.6	21	14.2	14.3	14.1	12.2	14.2	18.1	14.3	17.8	20.7	11.5	9.2	9.4	9	4.8	4.3
hsa-miR-1273h-3p	30.6652	107.8	72.2	78.8	25	31.1	58.2	50.8	56.1	46.1	67.7	37.9	50.6	42.9	48	54.8	52.7	75.5	51.1	77.4	60.2	43.7	72.7	76.2	55	94.3	118.1	26.4	31.1	27.2	32	33.5	0	0	0	0	0	0	0	0	0	0	0	0	0	0	0	0	0
hsa-miR-374b-3p	30.5545	5.7	12.3	8.1	24	22.9	23.4	25.8	24	27.1	19.2	27.7	22	19.1	54.3	43.6	42.2	24.6	33.2	23.9	43.4	36	3.4	5.8	20.9	18.5	20.9	21.4	16.7	15.8	24.7	16.7	49	53.5	48.1	47.3	40.7	40.1	41.3	41.3	60.8	55.5	37	28.2	42.2	46.1	50.5	30.1	39.2
hsa-miR-185-3p	29.853	2.3	5.2	2.5	13.6	14.3	19.7	15	14.3	18.1	16.2	16.1	17.8	17.4	22.4	23.9	23.6	23.2	17.9	26.9	30.4	22.7	19.6	26.7	9.9	11	12.4	5.1	13.8	10.4	16	13.8	17	17.3	13.6	17.7	19	17.7	20.2	12.9	20.5	19	9.6	12.4	20.4	19.2	23.3	22.4	24.9
hsa-miR-340-3p	29.6864	7.5	9.9	5	34.9	40	64.8	61.9	55.8	66.3	63.5	57	59	54	66.3	61.7	67.6	38.4	66.8	36.5	60.9	62.7	0.2	0	1	0.6	0.4	65.1	43.8	44.9	47.1	55.2	0	0	0	0	0	0	0	0	0	0	0	0	0	0	0	0	0
hsa-miR-6500-3p	29.6788	0.4	0.4	0	38.3	41.4	27.8	16.2	20.3	21.5	22.7	22.9	31.8	22.5	35.6	34.1	38.8	23.4	35.9	27.5	47.9	30.4	0	0	0	0	0.1	0.2	0	0	0.2	0	52.6	55.6	53.4	61.3	54.2	67.4	64.1	66	60.6	55.3	36.6	32.2	46.3	51	47.3	42.8	56
hsa-miR-139-5p	29.3106	1.5	0.4	0.6	0.1	0.4	0.3	0.2	0	0.6	0.5	0.2	0	0.4	0.2	0.3	0.1	0	0.6	0.2	0.1	0.4	61.3	28.2	26.3	14.3	20.8	8	7.8	5.5	6.7	6.9	5.5	10	6.8	8.7	9.5	9	8.6	9	8.1	10.4	6.6	8.5	8.6	8.9	8	9.1	10
hsa-miR-3681-5p	29.2818	6.8	18.2	7.6	0.1	0.1	0	0	0	0	0.2	0	0	0	0	0	0.1	0	0	0	0	0.1	0	0	0	0	0	1	1	0.8	0.4	1	0.5	0.3	0.2	0.4	0.7	0	0.4	0.2	0.2	0.1	0.2	0	0.2	0.5	0.4	0.4	0.7
hsa-miR-32-3p	29.1273	6.4	11.5	11.5	20.3	19.6	23.1	31.3	19.2	29.2	26	19.8	19.9	25.5	70.6	64	69.3	41.3	60.7	31.6	100.3	58.6	0.6	0.3	6.9	2.5	2	15.4	14.6	13.6	13.4	13.3	36	49.6	42.1	46.3	34.3	39.9	31.6	28.8	35.9	48.9	43	45.4	43.3	39.8	42.9	15.4	17.2
hsa-miR-27b-5p	29.1136	10.6	13.5	12.9	13.5	15.1	30.4	36.8	26.2	29	30.9	31.1	21.1	30.2	54	40.3	32.3	35.5	46	24.8	39.9	35.6	8.2	10.3	14.9	16.9	19.3	7.8	2.9	7.9	9.7	7.7	28.7	32.8	31.6	43.5	38.7	38.2	32.9	26.9	27.8	26	25.4	35.4	55.5	48.3	52.7	73.9	63.4
hsa-miR-99b-3p	28.8864	0	0.8	0	14.4	14.9	8.8	10.2	13.2	8.6	12.2	11.6	6.6	9	11.2	11	19.6	18.1	10.3	15.8	12.6	10.3	5	14.4	1.3	3	4.3	9.7	9.1	8.3	11.3	8.7	24.5	38.3	28.7	31.3	30.3	25.8	28.8	29.6	25	31.4	25.6	28.1	35.3	37.4	41.2	50.8	52.4
hsa-miR-127-3p	28.1758	36.9	27.8	25.2	1.2	2.2	0	0	0	0	0	0.9	0.2	0.2	0.8	0.1	0.3	0.9	0.6	1.7	0.1	0.3	141.7	225.9	95.9	56.7	111.3	61.3	136.1	157.7	156.2	205.5	1.6	0	354.4	0.4	0.2	0.4	0.7	5.8	1.4	0.8	0.4	0	0.2	0.7	2	5.3	0.7
hsa-miR-200b-3p	27.953	44.7	57.5	74.6	27.3	27	41	26	30.9	35.1	37.5	33.6	32.1	32.6	38.5	24.3	33.7	36.2	29.4	22.1	34.4	25.4	1.8	1.7	7.3	6.3	8	17.8	13.6	12.5	16.4	16.3	35.5	36.4	35.4	38.4	41.6	40.1	31.1	28.5	30.4	31.4	24.4	19.4	30.8	33.7	23.1	16.8	16.5
hsa-miR-3613-5p	27.7864	17.7	28.6	27.1	28.4	29.7	50.2	48.1	44.9	49	48	41.8	41.4	37.5	58.6	54	73.1	33.3	54.6	21.5	62.2	51.9	0.5	0.2	6	3.1	2.3	60.3	62.1	65.8	43.3	47.5	21.7	31.2	26	18.7	20.6	20.3	26.2	17.6	28.3	25.4	22.2	14.4	18	18.1	14.6	6.3	10.4
hsa-miR-455-3p	26.9515	0	1.2	1.4	16.3	10.8	48.4	43.1	41	37.9	44.3	45.6	28.8	60.3	47.9	45.7	47	21	31.7	16.8	39.1	63.6	0.1	0	0.1	0	0.1	0.5	0.7	1.9	0.4	1.6	0.2	0.3	0	0.2	0	0	0.4	0	0.2	0.2	0.2	0.2	0.2	0	0.2	0	0.3
hsa-miR-190a-5p	26.5924	0.4	5.2	5	36.7	45.5	68.8	51.6	59.5	56.2	54.3	48.4	38.2	52.1	57.1	56.1	54.6	38.3	59	41.7	60.3	57.4	0.3	0.1	0.4	0.5	0.6	5.9	6.1	8.9	6.2	8.7	24.5	30.7	24.1	19.9	21.5	19.8	20.7	31.2	29.5	28.1	34	25.3	22.3	17.2	20	11.6	14.9
hsa-miR-29c-5p	26.4439	84.1	108.3	102	4.5	4.4	12.9	12	10.9	9.5	7.3	10.4	8	9.9	10.9	12.2	8.4	9.1	13.7	5.9	8.4	10.3	2.4	3.3	37.7	10.1	11	47.5	38.9	53.6	44.9	40.6	21.3	25.4	22.1	25.4	21	16.8	14.6	20.4	20.1	28.3	13.6	14.9	15.3	15.4	19.8	20	27.8
hsa-miR-222-5p	25.4833	1.1	3.6	1.1	9.5	11.4	37.4	32.3	16.1	40.2	19.2	24.1	27.2	27.2	82	55.1	49.9	16.4	43.1	18.2	91.1	64.2	0	0.1	0	0.2	0.3	2.1	1.5	10.2	1.5	2.9	20.4	22.8	27.4	13.6	19.2	19.6	17.9	16.5	17.8	24.5	17.8	20.3	18.3	16.7	14.6	7.7	7.1
hsa-miR-365a-3p	25.3379	3.6	5.4	4.6	15.6	11.5	5.8	6.1	5.6	7.2	6.7	6.7	7.6	6.1	9.7	9.2	8.6	9.7	8.2	9.5	11.2	9.6	0.3	0.1	22	3.2	2.7	5.7	4.6	5.9	4.2	5	6.3	5.9	5.4	4.5	3.3	3.3	4.9	4.1	7.1	6.5	6.9	3.9	4.8	3	4.5	1.1	2.9
hsa-miR-365b-3p	25.3379	3.6	5.4	4.6	15.6	11.5	5.8	6.1	5.6	7.2	6.7	6.7	7.6	6.1	9.7	9.2	8.6	9.7	8.2	9.5	11.2	9.6	0.3	0.1	22	3.2	2.7	5.7	4.6	5.9	4.2	5	6.3	5.9	5.4	4.5	3.3	3.3	4.9	4.1	7.1	6.5	6.9	3.9	4.8	3	4.5	1.1	2.9
hsa-miR-940	25.2652	0.4	0.8	0.8	8.6	13.3	10.6	10.4	11.7	11.1	12.4	8.2	16.4	12.2	16	12.5	18.2	13.7	10.5	23.9	20.6	16.6	23.7	15.6	16.4	5.7	6.7	4.4	3.4	2.8	3.5	1.6	40.6	50.3	39	49.8	42	37.7	48.7	39.1	48.7	44.5	48.8	33.3	33.3	32.1	29.8	31.5	31.4
hsa-miR-885-5p	24.6848	0.4	0	0	0	0.2	0.3	0.6	0.8	0.2	0.2	0.2	0.7	0.6	0.9	1	0.8	0.9	0.8	0.5	1.1	1	0	0	0	0	0.1	0.9	0.3	1.1	0.5	0	16.7	18.6	18.4	19.5	16	17.3	18.8	20.4	16.7	19.4	21.8	16.7	14.6	16.1	12	23.1	25.2
hsa-miR-1180-3p	24.603	0.4	0.4	0.3	13.3	9.5	15.7	16.2	12.5	16.2	12.9	7.5	15.9	15	19.2	19.9	13.6	33.1	13.6	42.5	25.1	15.2	0.1	0	0	0	0	0.3	0.5	0.4	1	0.8	32.9	36.7	41.5	39.6	35	34.1	33.2	35.9	32.9	39.9	36	46.7	41.7	38.3	38.1	22.1	31.4
hsa-miR-548e-5p	24.4106	24.9	20.2	26.8	15.2	13.2	26	20.3	28.1	26.9	28.7	19.1	23.8	20.8	32.9	38.4	39.7	34.4	25.6	36.4	39.1	30.7	0.3	0.2	1.5	0.6	1.2	8.1	13.7	13.5	14.3	13.8	43.4	35.8	47.9	36.1	32.8	30.3	32.4	18.4	66.3	36.2	36.5	29.3	31.4	34.9	21.5	18.5	21.6
hsa-miR-22-5p	24.2015	9.1	7.9	7.6	1.7	1.5	2.8	2.2	4.7	2.5	1.9	3.4	3.5	1.7	6.1	4.5	4.1	6.2	5.5	3.6	3.3	4.8	22.2	17.8	147.7	29.5	29.8	41.7	33.7	39.4	50.4	41.7	5.2	6	3.5	5.7	3.8	3.8	4.4	5.6	6.6	6.4	3.8	4.7	5.3	5.3	4.1	2.1	1.6
hsa-let-7g-3p	23.7515	27.9	30.5	49.2	11.5	10.4	11.2	11	17.4	13.7	9.4	14.8	11.9	16.3	16.4	15.5	17.2	15.2	13.9	10.8	12.8	11.9	0.1	0.3	3.1	0.3	0.9	29.5	36.4	40.1	23.4	18.5	32.5	42.7	32.4	39.2	30.5	32.4	34.1	41.2	37.5	42.9	42.6	32.8	23.1	20.3	23.9	10.9	15.9
hsa-miR-574-5p	23.747	1.5	0.4	1.4	39.6	50.2	62.5	67	76.1	65.2	67.2	52.9	86.9	53.4	55.3	61.2	51.4	74.7	44.5	110	73.1	52.4	2.4	7.6	7.9	5.5	3.6	15	13.3	20.3	17.1	19.3	1	1.4	2.5	0.7	0.5	0.4	1.2	0.3	0.8	1.7	0.8	1.1	1.6	0.5	0.4	0.4	0
hsa-miR-1468-5p	23.7439	56.5	58.7	48.9	10.6	12.7	12.6	9.1	11.9	9.9	14.3	7.7	11.5	7.3	16	16.4	12.9	27.3	21	19.9	16.6	13.4	0.3	0.6	3.7	0.9	2.1	35.8	28.2	16.1	36.3	28.7	26.4	22.8	22.9	21.1	26.6	24.3	19.3	24.7	27.2	23.1	13.4	20.1	20.8	25.6	29.8	24.9	28.8
hsa-miR-215-5p	23.5333	36.8	42	41.8	26	25.4	17.2	15.7	19.6	16	20.5	14.2	17.6	18.2	24.6	26.5	27.7	12.7	21.9	11.9	26.2	25.2	1.5	2.5	10.9	7.2	15.4	60.3	47.4	52.3	38.4	37.3	21	19.3	21.5	17.6	23.1	17.9	24.9	27.1	21.5	21.8	17.4	12.4	16.2	15.1	16.7	17.7	26.1
hsa-miR-331-5p	23.5303	5.3	6.7	7.8	4.3	3	4.8	4.7	5.2	4	6.1	2.5	3.3	3	8.4	8	6.6	5	2.9	6.3	5.2	5	0.7	0.3	1.3	0.2	0.5	7.1	11.2	10.2	7.4	8.9	46.7	44.6	46.4	51.6	47	42.6	43.4	50.1	54.2	50	21.6	21.1	37.4	34.7	41.4	39.6	41.4
hsa-miR-3609	23.3545	98.4	68.2	141.7	2.7	3.8	2.3	1.4	3.9	3.6	2.3	5.7	4.2	3.8	2.8	2.1	1.4	3.4	2.9	5.7	2.8	3.1	0.1	0.5	2.1	0.2	0.5	358.2	143.4	137.1	144	113.5	3.1	1.3	1.7	5.3	5	0.9	1.1	3	1.4	1.1	1.8	2.3	2.9	2.7	1.9	9.1	9.4
hsa-miR-153-3p	22.5879	3.6	2.6	2.9	36.8	35.9	19.3	20.4	23.4	22.2	19.3	22	17.1	22.7	23.3	23.7	24.3	11.7	25.3	13.5	19.4	23.6	0	0.1	0.2	0	0.1	7.3	8.2	7.7	4.4	3.5	37.1	35.1	32.7	33.9	38.4	32.6	35.8	42.7	45.4	44.2	25.1	20.6	20.4	15.9	15.2	9.3	9.4
hsa-miR-153-3p	22.5879	3.6	2.6	2.9	36.8	35.9	19.3	20.4	23.4	22.2	19.3	22	17.1	22.7	23.3	23.7	24.3	11.7	25.3	13.5	19.4	23.6	0	0.1	0.2	0	0.1	7.3	8.2	7.7	4.4	3.5	37.1	35.1	32.7	33.9	38.4	32.6	35.8	42.7	45.4	44.2	25.1	20.6	20.4	15.9	15.2	9.3	9.4
hsa-miR-432-5p	22.1576	0.4	0	0	0.3	0	0	0	0	0	0	0	0	0	0	0	0	0	0	0.2	0	0	468.3	736.4	111.7	32.4	64.6	10.7	10.7	8	11.8	6.4	0	0	0	0	0	0	0	0	0	0	0	0	0	0	0	0	0
hsa-miR-125b-5p	22.0136	8.7	10.1	4.6	0.4	0.5	0.1	0.2	0	0.1	0.1	0	0.1	0.2	0	0	0.2	0.1	0	0.1	0	0.3	1.6	3.6	10.9	10.2	15.8	35.3	45.4	34.8	27.7	43.1	45.8	44.6	62	39.5	38.9	40.6	37.2	54.8	45.3	46	33.3	30.4	25.9	21.5	15.4	14.9	15.7
hsa-miR-33b-3p	21.9258	4.9	10.3	6.2	22	24.7	17.2	21.7	22.3	18.9	12.9	15	17.6	12.7	28.9	37.8	33.6	33.8	24.4	31.9	29.4	21.4	0.1	0	0.2	0	0	3.9	4.6	3.7	2.7	2.6	44.6	55.8	44.3	36.6	29.2	34.3	39.9	46.8	42.3	63.5	40.8	28.4	18.9	17.9	18.1	7.4	7.8
hsa-miR-125b-5p	21.9121	8.3	10.1	5.2	0.4	0.5	0.1	0.2	0	0.1	0.1	0	0.1	0.2	0	0	0.2	0.1	0	0.1	0	0.3	1.6	3.6	10.9	10.2	15.8	35.1	46.3	35.1	27.3	43.7	45.3	43.5	62.2	39.3	38.6	40.6	36.8	54.6	45	45.8	32.9	29.9	25.6	21.6	15.3	14.9	15.1
hsa-miR-20a-3p	21.0212	5.3	2.4	4.8	13.1	16	35.4	31.7	39.7	37	35.8	39.5	26.2	29.4	41.4	30.3	36.5	33.1	29	23.4	38.4	39.3	0.1	0.8	1.7	1.7	1.8	5.3	7.1	6.9	6.5	4.3	31.5	40.1	32	31.3	23.5	23.3	18.8	25.1	26.1	40.3	15.4	15.8	13.2	17.4	20.9	21.7	19.7
hsa-miR-450a-5p	20.5364	0.4	1.8	1	6.4	7	4.7	5.3	7.7	7.9	8.1	6.8	4.7	8	10.7	9.2	11	5.9	9.5	6.9	10.5	11.5	1	0.6	7	6.3	6.1	9.6	10.9	9.6	9.7	10.2	48.9	57	47.6	50.1	51.8	37.9	37.8	39	62.1	58.3	36.2	28.4	34	28.4	16	11.4	15.7
hsa-miR-450a-5p	20.5227	0.4	1.8	1	6.6	7	4.7	5.5	7.9	7.7	8.1	6.8	4.7	8	10.6	9.2	11	5.9	9.5	6.9	10.4	11.5	1	0.6	7	6.3	6.1	9.6	10.9	9.6	9.7	10.2	48.9	56.8	47.9	49.9	51.7	38.2	37.8	39	62.1	58.2	36.2	28.4	34	28.5	15.8	11.4	15.7
hsa-miR-2110	20.453	6	6	7	7.9	7.2	12.1	7.5	5.5	9.9	8	11.8	8.2	7.9	5.1	7.4	8.1	8	8.4	6.6	10.5	7.2	82.4	82.7	42.6	48.3	49.2	4.3	6.1	9.9	7	10.4	22.6	22.3	25.8	19.5	16	19	16.5	21.7	20.8	22.7	20.8	20.7	19.1	13	19.8	17.9	18.4
hsa-miR-23a-5p	20.2197	4.5	18.6	29.6	80.2	86.1	39.7	42.2	51.7	29.9	29	41.8	25.8	29	42.7	46.8	41.2	45.6	56.1	31.9	37	34.6	12.6	20	6.7	7.1	5.5	9.1	15.5	38.7	12	39.4	0.5	0.3	1.4	0.8	0.9	0.2	0.7	0.8	0.5	0.8	1.6	1	2.7	1.3	0.6	0.7	2.6
hsa-miR-1908-5p	20.1409	0.8	0	0.8	25.1	32.6	29.9	30.7	30.1	33.2	40.3	20.4	37	20.6	42.4	46.5	56.5	78.4	40.3	73.5	58.5	39.1	12.9	7.7	0.6	0.8	0.2	0	1	2.6	0.2	1.7	4.4	6.3	5.6	4.3	4.8	5.8	4.7	7.7	6.4	5.2	6.6	6.4	5.7	4.7	4.3	3.5	3.6
hsa-miR-664a-5p	19.8061	54.3	46	41.9	7.8	4.9	5.1	5.7	7.5	5.5	5.2	7.7	6.6	4.7	6.5	6.3	9.8	9.1	8.2	9	9.1	6.7	203.4	299.1	86.3	97.3	104	8.3	9.5	16.1	13.2	10.9	1.5	1.3	0.8	1.8	0.9	1.1	1.2	2.2	1.6	0.7	1.2	2.5	1.4	1.6	0.9	1.1	1.3
hsa-miR-483-3p	19.6455	0	0	0	0	0.1	0	0	0	0.2	0	0	0	0.4	0	0.4	0	0	0.2	0.3	0	0	0	0	0	0	0	0	0	0	0	0	0	0	0	0	0	0	0	0	0	0	0	0	0	0	0	0	0
hsa-miR-616-5p	19.2909	16.2	17.1	17.3	4.6	8	11.7	16.2	16.4	15.4	19.4	16.8	15.2	11.4	14.3	12.9	15.2	13.3	15.3	13.4	14.4	11.5	0.1	0	0.7	0.3	0.1	18.3	12.4	12.9	10.2	12.4	32	34.1	25.6	37.4	31.2	27.1	27.1	16.8	34.2	34.2	35.8	32.3	38.7	29.4	21.6	19.3	17.5
hsa-miR-1268b	18.7788	0	0	0	12.6	16.7	6.9	5.8	10.1	9	7.9	5	6.9	7.7	36.4	31.7	42	40.6	40.8	40.3	51.5	45.9	13.9	13.5	2.3	2.9	2.2	0.5	2.7	3.4	2.2	4.6	21.3	37.1	26.8	33.9	24	26.1	27.6	39.3	26.4	29.4	24.6	21.8	22.1	19.8	19.7	11.2	13.6
hsa-miR-29a-5p	18.6424	10.2	15.5	17.3	2.7	1.6	9.8	7.1	9.9	9.3	5.2	8.2	10.3	11.2	10.3	6.2	8.1	10.8	6.9	4.4	7.6	8.1	0.6	1.9	11.3	2.2	4.1	17.9	16.4	26	26.8	25.5	8.4	12.3	14.6	18.3	9.2	8.5	7.2	6.6	12.5	15.6	7.8	6.2	8.9	12.7	10.4	18.2	17.8
hsa-miR-628-5p	18.5818	7.2	13.1	9.2	20.9	22.9	31.6	28.2	29.9	35.8	34.2	24.5	28.1	30.4	41.3	45	46.4	34.8	34.2	37.6	39.3	32.5	6.5	3.2	4.4	3.1	3.5	25.7	21.3	18.3	30.6	21.3	13.1	12.6	14.2	13.8	11.1	12.8	14.6	13.3	15.3	13.2	7.4	9.2	15	16.1	11.7	11.6	9.1
hsa-miR-4446-3p	18.2242	2.6	2	1.7	0.1	0.1	0	0	0	0	0	0	0	0	0	0	0	0	0	0	0	0	25	66.7	36.2	14.3	21.8	3.1	5.1	5.7	7.7	6.5	38	46.1	35.9	37.2	40.5	38.4	48.5	68.5	41.8	24.7	29.8	25.8	29.4	28.5	32.4	51.9	54
hsa-miR-33a-3p	17.9712	8.7	11.1	15.4	8.7	9.2	8.1	6.3	7.5	6.7	5.2	7.7	10.3	7.9	19.8	15.8	21.9	18.3	15.8	11.1	14.8	25.3	0	0	4	0.4	0.1	11.3	13.2	14.6	15.6	16.1	21.7	43.5	27	38.4	27.4	25.4	25.8	24.3	30.4	39.2	21.4	13.1	19.1	22.3	25.7	39.6	41.4
hsa-miR-873-5p	17.4636	1.9	2.4	5	4.4	4.4	1.8	0.8	0.8	1.5	0.9	0.5	1.4	0.9	2.2	3.5	4.4	5.3	4	3.3	4.6	2.6	0.7	1.1	20.1	1	1.4	202.9	215.6	173.3	250.5	228.8	0	0	0	0	0	0	0	0	0	0	0	0	0	0	0	0	0
hsa-miR-147b	17.2424	0.8	0.4	0.3	4.8	3.9	14.4	9.9	10.6	11.2	11.2	6.8	7	7.9	15.4	10.8	14.1	7.7	10.9	7.9	13.5	12.8	0	0.2	0.2	0.2	0	32.1	19.3	24.1	24.3	28	7.3	6.3	5	6.7	7	6.2	7.4	7.3	6.6	6.7	3.8	3.9	4.8	5.3	5.7	6	4.5
hsa-miR-152-5p	17.1576	0.4	0.8	0.6	17.6	14.1	45.9	63	57.4	48.8	45	40.4	38.9	43.7	36.5	55.2	47.4	73.4	37.6	63.4	47.1	38.7	0	0	0	0	0	5.7	2	1.7	1.9	1.9	6	5.5	3.1	5.1	7.4	4.5	6.9	5.4	7.3	6.2	8.6	10.5	8.1	9.1	7.8	10.9	10.4
hsa-miR-26a-2-3p	17.1091	14.3	10.7	20.4	10.6	7.3	27.3	26.4	37.6	26.3	19.4	37.7	14.8	29.6	50.2	37.3	42.7	33.5	53.8	11.1	39.8	44	0	0.1	1.6	0.9	0.8	23.5	27.2	19.6	18.1	27.5	15.6	16	13.6	25.2	19.9	13.6	9.8	12	14.8	20.7	13.4	10.8	13.4	17.9	21.6	7.7	4.9
hsa-miR-1268a	16.4833	0	0	0	10.9	13.9	3.9	4.6	7.8	5	6.2	3.6	4.8	5.3	33.6	28.6	37.9	35.6	35.3	35.7	45.1	41	13.3	11.7	1.7	1.5	1.5	0.5	2.7	3.3	2	3.8	18.7	33.7	24.8	30.3	22.2	24	23.2	35.7	22.3	26.2	22.6	20.5	20.5	17.7	17.3	8.8	12.3
hsa-miR-1287-5p	16.3379	1.5	1.6	1.7	0.5	1	0.7	0.6	0.8	0.6	0.7	0.5	0.9	0.9	1.4	0.6	1.1	1	1	0.8	0.6	0.6	8	14.1	29.4	20.1	26.4	2.4	5.4	5.4	4.7	5.3	13.8	16	19.8	18.5	11.8	11.1	17.1	15.9	17.3	18.1	10.6	7.2	11.8	23.4	21.5	25.2	25.9
hsa-miR-19a-5p	16.3197	2.3	2.8	4.8	15.2	15.1	8.1	8.5	13.8	8.4	8.4	6.1	7.3	9.2	31.2	33.1	26.4	16.2	28.8	10	25.4	29.3	0	0.1	0.3	0.2	0.2	5	3.7	6.1	2.2	2.1	33.6	32.8	34	30.1	29.8	20	26.4	24.1	27.6	36	19.2	19.8	15.8	13.1	13.3	4.9	8.7
hsa-miR-501-5p	16.1682	1.9	0.8	2.5	11.5	13.6	18.3	18.1	22.3	19.6	15.2	20.4	22.7	20.4	13.4	13.7	14.3	13.5	13.4	16.6	14.8	15.5	0	0	0.9	0.1	0	7.2	4	6.8	5.5	4.4	19.5	25.4	27	28	16.5	15.6	21.4	17.6	26.9	28.2	20.6	19.4	19.7	16.6	15.9	33.6	24.3
hsa-miR-769-3p	15.7061	0.4	0	0.3	4.9	6.8	17.7	12.2	19.5	17.9	7	11.1	18.3	15.6	13.8	11.5	15.5	17.4	7.1	15.2	19.1	13.8	0.9	0.3	2.9	1.1	1.4	3.6	4.4	3.6	7	4.8	19.5	30.2	22.7	24.4	18.1	19	22.7	14.8	23.9	24	16.8	17.5	20.5	25.8	40.3	51.5	53.4
hsa-miR-3677-3p	15.6182	0.8	1.2	0.6	13.7	14.8	12.4	9.3	11.2	9.9	10.8	7	15.2	11.4	11.8	12.9	16.9	10.8	9.7	20.2	15.7	12.6	0	0	0.4	0.2	0.7	2.9	2.7	5.6	2.3	4.4	32.5	36.2	29.5	30.5	24.9	29.2	31.8	40	32.9	29.1	15.4	18.1	22	22.5	27.6	22.8	24.9
hsa-miR-95-3p	15.4667	7.5	11.5	13.1	3.8	5.2	6.3	4.7	4.4	4.4	4.9	2.7	3.5	2.4	9.1	6.9	7.1	9.4	7.8	5.5	8.1	3.9	26	33.3	34.3	14	22.8	11.1	15.9	12.5	9	9.6	30	30.2	30.3	28	22.2	22.6	23	27.3	29.5	30	20.2	14.9	20.8	23.3	21.8	14.7	21.4
hsa-miR-3912-3p	15.3773	34.3	25.8	36.1	8.5	8.7	15	17.7	17.9	15.8	14.3	20.7	18.3	18.6	20.9	23.7	22.8	17.9	24.8	14.7	22.2	24.3	0	0.8	1	1.4	2.1	21.1	24.9	18.6	29.4	23.7	13.1	14.9	14.4	13.2	12.6	15.4	13.9	16.7	14.4	17.9	20.8	16.3	15.1	16.3	17.6	17.2	12.3
hsa-miR-2277-5p	15.3697	2.3	2.8	3.9	14.7	16.7	25	34.9	26.5	35.1	34.9	22.3	36.5	30.4	20.9	19.4	22.9	21.2	15.8	23.4	25.7	21.4	0.3	0.9	0.1	0.4	0.4	4.1	7.4	7	5.9	7.6	15.1	12.3	19	18.7	18.5	15.4	18.8	21.1	15.8	18.8	16.2	17.5	15.9	15.3	14.4	4.6	13.3
hsa-miR-183-3p	15.2818	0.8	0	0	72.3	81	20	14.4	17.4	18.7	19	19.8	22.7	21.5	29.9	25.2	24.8	19.1	28.2	22	31.1	28.8	0.1	0	0	0.1	0.1	0	0	0.1	0.4	0	14.6	15.5	14.9	16.5	14.7	13.9	17.9	9.7	12.8	16.4	6.4	10.3	16.2	17.2	18.3	19.3	23.9
hsa-miR-30b-3p	15.0288	9.8	6.3	7	8.3	8.5	18.2	23.3	25.2	17.5	23.2	24.8	13.1	19.7	25.3	25.3	22.3	27	30	19.3	23.9	22.3	12.1	14.4	19.7	18.2	9.5	3.8	3.1	2.9	3.7	2.6	13.6	19.4	11.1	16.1	11.1	16.2	13.5	11	13	23.4	20.4	19.9	16.6	18.4	14.4	4.2	7.1
hsa-miR-944	14.9652	9.8	12.3	6.2	0.4	1.9	0.2	0.4	1.3	0.8	1.6	0.7	0.9	1.1	0.3	1.5	1.5	1	1.5	1.3	1	1.9	0.7	1	7.7	6.7	4.4	2	2.9	0.6	3.6	1.3	0	0	0	0	0	0	0	0	0	0	0	0	0	0.1	0	0	0
hsa-miR-5100	14.7258	117.6	77.7	74.1	7.1	13.1	1.8	1.6	1.6	1	1.2	0.2	0.7	1.9	5.7	3.3	6.2	5.1	4.4	3.8	8.7	5	0.9	0.3	1.7	0.2	0.9	1.8	0.5	0.7	1.7	2.5	6.3	10.5	8	11.8	8.1	6.8	7.9	14.4	11.7	8.7	11.4	8.2	10.3	8.7	7.2	7.7	10
hsa-miR-503-5p	14.697	0	0	0.3	0.8	1	1.7	1.4	2.6	1.1	1.6	1.1	0.9	1.1	0.9	1	1.1	1.4	1.5	2.2	1.4	1.2	42	53.8	65.1	45.6	66.7	0	6.4	11.5	0.4	0.6	7.8	13.4	13.6	11	11.3	11.7	10.4	13.3	13.1	11.2	8.4	5.9	6.7	8	7.4	7.7	6.5
hsa-miR-576-3p	14.6015	2.3	5.6	2.5	1.8	2.2	12.9	13.4	12.5	17.2	12.7	11.4	13.8	14.4	13.2	14.2	16.9	10.8	16.4	13.1	14.1	14.8	1.9	2	15	18.5	13.9	5.1	5.6	7	6.9	6	29.4	25.7	22.1	23.6	23.7	22	24.8	16.3	20.6	20.2	7.8	8	18.1	24.2	27.7	14.4	16.8
hsa-miR-301a-5p	14.4773	0.4	0	0.3	2.7	1.6	6.3	4.5	3.6	8	8.4	7.3	6.8	5.6	7.5	5.7	12	5.5	7.3	8.7	12.8	6.5	18.5	17.1	7.2	22.9	20	0.7	0.7	0.6	0.6	1.4	27.9	35.1	32.2	31.5	25.8	27.5	22.8	26.2	29.2	39.9	50.6	38.4	25	22.8	15.2	17.9	13.6
hsa-miR-381-3p	14.3621	6.8	3.6	2.8	0.4	0.1	0	0	0	0.2	0	0	0	0	0	0	0	0.3	0.2	0.2	0.1	0	0.3	0.2	0.6	0.2	0.4	29.6	29.4	31.7	60.1	51.4	0.5	0.3	30.9	0.2	0	0	0.2	0.8	0	0.2	0.2	0.2	0.3	0.5	0	1.1	0.7
hsa-miR-101-5p	14.1727	24.5	37.7	41.4	6.4	8.9	3	4.7	3.6	3.6	4.5	3.6	2.1	5.4	9.7	6.9	6.8	7.5	10.5	2.2	6.5	10.6	0	0.2	0.4	0.1	0.2	68.4	64.6	71.7	57.3	44.5	13.3	16.3	14	19.1	13.1	12.8	13.4	8.6	12.3	14.2	8.4	8	9.4	10.9	10.4	14.4	13.9
hsa-miR-1271-5p	14.1015	126.7	151.9	171.3	0.2	0	0.2	0.4	0	0	0	0.2	0.2	0.2	0	0	0.1	0	0.2	0	0.3	0.1	2.2	4.6	6.5	1.8	4.4	12.6	11.4	9.5	5.6	6.6	6.5	8.4	4.5	3.3	3.2	4.7	1.2	2.8	5	6	2.4	2.1	2.9	2.7	3.1	0.4	4.5
hsa-miR-9-3p	14.0515	0.4	0.1	0.2	12.7	12.1	9	6	8.4	7.9	10.3	8.3	7	7.5	10.1	8	10.6	12.3	8.2	9.3	10.5	10.3	0.2	0.3	1.4	1	0.9	0.7	0.4	0.7	0.4	0.5	25.9	38.5	25.6	25.2	23.2	22	25.9	34.1	29.8	27.8	23	17.2	14.1	12.2	12.1	8.5	11.5
hsa-miR-9-3p	14.0515	0.4	0.1	0.2	12.7	12.1	9	6	8.4	7.9	10.3	8.3	7	7.5	10.1	8	10.6	12.3	8.2	9.3	10.5	10.3	0.2	0.3	1.4	1	0.9	0.7	0.4	0.7	0.4	0.5	25.9	38.5	25.6	25.2	23.2	22	25.9	34.1	29.8	27.8	23	17.2	14.1	12.2	12.1	8.5	11.5
hsa-miR-5690	14.003	1.9	3.6	7	5.5	4.4	4	3.2	3.1	2.9	5.4	2.3	3.5	2.3	4.6	4.6	3.6	5.6	2.9	9	4.7	5.3	0	0	0.6	0.2	0	7.3	9	12.2	8.9	8.9	28.4	31.7	26.8	29.7	26.2	28.8	29.2	31.8	24.8	32.4	38.8	27	24.2	22.5	17.6	10.5	14.2
hsa-miR-3651	13.8803	33.9	34.5	24.6	0.3	0.1	2.2	2.4	2.3	1.9	1.2	3.6	2.1	3.2	2.3	2	2.5	4.3	3.2	3.6	2.2	2.3	0	0	0.1	0	0	2.5	0.7	1.4	1.6	1.6	8.8	17.8	21.9	31.7	24.4	19.6	19.5	9.9	15.3	21.9	26.4	34	32	31.3	22.6	119.8	105.5
hsa-miR-190b	13.8136	6.4	5.6	6.4	29	24.8	25.1	20.1	22.9	27.4	22.3	21.3	21.5	22.1	28.6	33.9	40.8	22.5	36.3	26.1	34.9	35.6	1.9	2.5	12.4	4.5	3.8	21.6	15.7	17.2	20.3	13.1	9.7	8.4	6.8	11.2	10.6	12.4	11.3	12.9	8.4	6.5	4.8	5.9	9.1	12.3	10.2	11.2	14.9
hsa-miR-2355-5p	13.7621	24.9	34.9	21.5	31.1	34.4	15.7	19.9	14.5	18.1	18.7	15	18	16.7	19.8	19.3	24.2	20.5	25	22.6	18.8	19	14.5	14.4	39.2	31.9	34.7	23.4	24.7	22.9	12.8	14.4	4.9	6.8	4.3	6.7	4.3	6.4	4.6	5.8	6.6	6	5.4	4.7	3.7	3.6	1.9	4.2	1.6
hsa-miR-9-3p	13.6409	0.3	0.1	0.2	12.1	11.6	9.3	6.3	7.7	7.8	9.3	8	6.8	8.1	9.5	7.7	10.8	12	8.1	9.1	10.1	10.1	0.2	0.3	1.4	1	0.9	0.7	0.2	0.7	0.4	0.4	24.9	38.1	24.5	24.5	22	21.3	25.3	32.9	28.8	27	22.4	16.3	13.8	11.7	11.3	8.5	11.7
hsa-miR-760	13.6273	0.8	0.8	0.6	3.6	4.5	4.8	3.4	4.9	6.9	5.4	3.4	7	3.9	6.1	6.2	7.6	6.5	5	15	12.3	7.2	19.3	39.7	10	7.6	8.8	0.7	1.8	3.3	1.7	2.3	22.7	29.4	28.9	28.6	21.5	28.8	35.7	27.9	26.7	19.9	17.2	18.3	17.7	18.6	16.6	26.6	26.5
hsa-miR-6852-5p	13.4591	4.9	1.6	0.8	1.8	1.5	2.3	1	1.8	1.3	1.9	1.4	1.4	2.4	2.8	3.5	2.9	2.4	1.5	2.1	4	3.2	189.8	163.5	93.8	101.9	124.4	8.6	6.8	4.6	9.5	10.3	1.1	2.9	2.9	1.8	2.3	1.5	1.2	1.7	1.3	2.5	2.8	1.8	2.4	3.4	2	6.7	5.2
hsa-miR-195-5p	13.4545	181.8	107.6	134.7	8.6	9.5	8.3	9.7	7.2	8.3	7	10.1	7.2	10.4	12.5	11.8	18	19.7	15	13.6	16.2	11.5	7.1	3.8	14.9	2.3	4.1	8.1	14.5	17.6	8.3	12.9	1.6	3	2.4	2.5	2.3	2.1	1.7	1.9	2.7	3.1	1.7	1.5	2.6	2.5	2.2	2.1	2.7
hsa-miR-455-5p	13.2258	1.1	3.2	4.8	12.4	13.4	39.5	35.9	39.5	35.1	46.1	41.8	27.9	51.1	48.8	41.3	38.1	29.5	33.4	26.9	47.8	66	0	0	0.4	0.2	0.3	2.4	3.9	2.7	3.3	4	0.2	0.3	0.6	0.2	0.2	0.4	0	0	0	0.5	0.4	0.2	0.5	0.5	0.6	0	1
hsa-miR-4661-5p	12.8273	3.4	21.4	3.1	14.3	15	26.9	27.6	26.2	35.3	42.6	32.7	27.9	30	37	41.4	37.9	54.6	39.9	41.6	45.1	35.2	0.2	0.1	0	0.1	0	2	3.2	1.5	2.5	2.1	7.6	5.5	4.1	8.7	6.5	7	4.9	6.2	5.2	6.1	7.4	7.4	7.3	7.9	6.7	9.8	9.7
hsa-miR-744-3p	12.7924	0	1.6	0.8	4.9	4.8	2.3	4.1	3.9	5.2	4.2	4.1	4	4.1	6.6	7.3	7.7	8.7	5.7	9	7.5	8.8	0	0	0.9	0.2	0.1	4.9	4.4	2.4	5.1	6.2	21.6	29.6	29.5	27.6	25.1	28.1	28.8	26.2	25.3	30.7	17	18.6	21.3	22.3	18.7	12.3	10.4
hsa-miR-7705	12.6879	4.2	3.6	5.9	12.3	12.4	16.4	7.1	7.5	11.4	12.7	8	9.8	8.6	8.4	11.9	6.2	8.2	10.3	7.7	8.6	10.1	0	0	0.2	0.1	0.3	19.5	18.7	23	16.7	17.6	19	18.4	17.3	14	16.7	22	14.4	24.9	23.6	20.8	13.2	12.9	14.8	12.4	17.6	11.2	12.9
hsa-miR-1277-3p	12.5955	0.8	0	0.8	0	0	0	0	0	0	0	0	0	0	0	0	0	0	0	0	0	0	19.8	27.5	254	231.1	258.4	1.6	1.7	1	0.7	0.4	0.2	1.3	1.4	0	0.5	0.6	1.1	0.9	2.2	0.8	2.2	0.8	0.8	0.4	0.6	0	0.3
hsa-miR-409-3p	12.3258	12.8	6.3	4.2	0.2	0.1	0	0	0	0	0	0	0	0	0	0.1	0	0.3	0.2	0	0.1	0	35.6	47.9	17	10.7	17.8	69.3	57.3	56.4	80.6	74.1	0.2	0	7.8	0	0	0.2	0	0.2	0	0	0	0	0.5	0	0	0	0
hsa-miR-219a-1-3p	12.1258	0	0.8	0.6	5.1	5.8	11.4	13.2	13	8.6	7.7	10.9	8.2	7.9	9.2	9	8.4	8.4	11.8	13.8	9.7	9.2	0.5	0.7	0.5	0.2	0.8	2.7	1.9	1.1	2	0.9	24.3	14.2	22.1	21.9	25.5	22.8	22.1	23.6	19.4	16.4	18.4	23.2	18.6	23.2	35.3	37.5	29.1
hsa-miR-410-3p	12.1227	13.6	8.3	2.8	0	0.1	0.2	0	0	0	0.5	0	0	0	0	0.1	0.1	0.3	0	0.5	0.1	0	4.2	2	1	0.4	0.9	72.1	57.5	64.9	90.6	87.6	0	0	10.1	0.2	0	0.2	0	0	0.5	0	0	0	0	0.1	0	1.1	0.3
hsa-miR-659-5p	12.0197	37.3	29	32.4	10.7	11.4	5.5	10.2	11.2	9	11.2	9.8	7	9.9	11.4	14.8	12	12	15.1	10.6	11.3	14.3	1.3	3.6	6.3	10.7	9.1	16.3	14.9	12.6	18.6	18.4	11	16	9.1	12.2	10.9	13.6	10.7	12	11.2	16.8	15.4	13.6	12.7	14.2	15.7	13.3	12
hsa-miR-6842-3p	11.7682	18.5	15.9	15.1	15.3	18.3	13.9	14.4	13.8	19.1	17.1	15.2	27.4	20.6	20.3	19.3	23.4	22.7	22.3	28.1	32.6	24.5	14.6	14.1	2.2	3.1	2.3	4.2	8.9	8.5	14	20.9	8.6	5.5	9.5	8.3	5	7	7	6.7	6.9	8.2	8.2	9.8	6.7	6.7	9.8	10.2	12.3
hsa-miR-550a-5p	11.7348	0.9	0.8	0.6	24.2	25.9	29	30.7	34.2	37.6	34.9	26.2	30.6	25.5	30.7	30.5	29.4	29.9	29.9	39.3	26.8	25.2	0.1	0.1	0.2	0.2	0.1	1.9	2.3	0.5	0.9	1.1	7	6.8	6.9	8.1	7.9	9.8	7.9	7.9	7	8.4	5.7	5.4	6.5	5.7	4.4	2.5	2.9
hsa-miR-550a-5p	11.7348	0.9	0.8	0.6	24.2	25.9	29	30.7	34.2	37.6	34.9	26.2	30.6	25.5	30.7	30.5	29.4	29.9	29.9	39.3	26.8	25.2	0.1	0.1	0.2	0.2	0.1	1.9	2.3	0.5	0.9	1.1	7	6.8	6.9	8.1	7.9	9.8	7.9	7.9	7	8.4	5.7	5.4	6.5	5.7	4.4	2.5	2.9
hsa-miR-550a-3-5p	11.7136	0.9	0.8	0.6	24.1	25.8	28.9	30.5	34.2	37.6	34.7	26.2	30.6	25.4	30.7	30.5	29.3	29.9	29.9	39.2	26.8	25.2	0.1	0.1	0.2	0.2	0.1	1.9	2.3	0.5	0.9	1.1	7	6.8	6.9	8.1	7.8	9.8	7.8	7.9	7	8.4	5.7	5.4	6.4	5.7	4.4	2.5	2.9
hsa-miR-550a-3-5p	11.7136	0.9	0.8	0.6	24.1	25.8	28.9	30.5	34.2	37.6	34.7	26.2	30.6	25.4	30.7	30.5	29.3	29.9	29.9	39.2	26.8	25.2	0.1	0.1	0.2	0.2	0.1	1.9	2.3	0.5	0.9	1.1	7	6.8	6.9	8.1	7.8	9.8	7.8	7.9	7	8.4	5.7	5.4	6.4	5.7	4.4	2.5	2.9
hsa-miR-628-3p	11.4864	6.8	14.3	9.8	16.7	15.2	18.7	10.8	13.2	17.5	14.5	14.5	18.3	12.7	18	19.4	14.7	17.8	13.4	18.7	17.7	14.8	34.3	16.7	3.1	1.1	0.8	3	13.6	11.4	18.1	16.7	11	6.3	9.1	6.9	9.2	8.7	7	8	9.7	12	4.6	6.2	7.3	7.6	9.3	11.6	13.9
hsa-miR-4421	11.4606	0	0	0	10.5	10.9	10.6	6.7	9.9	8.6	7.7	10.2	8.7	6.4	10.9	11.7	11.2	7.3	12	11.9	16.2	12.4	0.7	0.9	1.5	0.9	0.7	0	0	0	0	0	22.2	26.2	26.2	25	21.9	22	19.9	23	24.5	27.6	30.2	24.7	21.3	18.8	19.6	12.3	16.5
hsa-miR-16-1-3p	11.2091	3.8	6.3	5.9	5.9	6.2	15	14	20.5	16.2	12.9	16.8	10.5	14.6	17.3	15.7	14.8	10.9	16.4	13.8	13.1	17.5	0.1	1.2	0.6	1	0.4	1.3	1.7	3.3	2.4	0	18.5	23.9	21.2	20.5	21	16.4	13.5	18.1	19.2	16.9	14.4	11.6	11.8	13.1	11.3	2.5	3.9
hsa-miR-3691-5p	10.9833	1.5	0.8	0.3	2.2	1.8	2.3	1.6	0.8	4	1.4	1.8	2.8	1.1	2.2	1.5	1.9	1.4	1.1	3.2	3.6	1.3	0.3	0.6	0.9	0.6	1.3	0.5	2	2.2	1.2	1.3	25.8	23.1	23.5	19.1	23.3	26.4	27.2	28.4	25.1	23.1	22	17.8	18.5	19	35.1	29.4	21
hsa-miR-138-1-3p	10.8697	0.4	1.6	1.7	0.2	0	0	0	0	0	0	0	0	0	0	0	0	0	0	0	0	0	0	0	0	0	0.1	0.5	0.5	0.3	1.3	0.6	12.7	10.2	13.2	14.4	14	12.8	13.2	10.5	15.6	8.6	12.4	10.8	14	11	8.7	12.3	11.3
hsa-miR-548d-5p	10.8591	2.3	1.3	1.7	12.4	13.6	14.2	15.1	16.6	16	12.1	15.4	14.5	12.9	20.9	21.7	21.6	17	21.1	20.3	23.1	18.8	0.4	0.3	0.9	0.9	0.9	5.7	4.8	4	3.4	3.2	16.6	13.9	14.5	10.9	12.8	12.3	11.5	12.8	18.1	14.4	7.8	8.9	7.7	11.5	14.7	8.3	8.7
hsa-miR-486-3p	10.6788	205.2	102.9	56.9	0.3	0.4	0.3	0.4	0.4	0.1	0.9	0.1	0.5	0.1	0.5	0.4	0.7	4.9	0.5	1.7	0.5	0.4	12.7	32.8	20.3	32.9	30.9	17.4	16.5	20.7	14.2	15	0.2	0	0	0.1	0	0	0.2	0	0.2	0.1	0.1	0	0	0	0.4	0	0
hsa-miR-580-3p	10.5697	4.5	8.3	5.9	9.5	8.6	14.1	15.4	15.8	15.1	24.1	19.8	17.1	13.9	20.1	22	20.1	14.3	16.8	15.3	22.5	17.9	0	0	1.1	0.7	1.3	10	7.6	7.2	6.9	5.4	12.7	14.9	10.3	14.8	12.6	13.2	11.6	11.2	12.5	16.7	5.6	6.5	10	10.2	13.3	7	10.7
hsa-miR-550a-3p	10.5121	2.5	3.2	1.7	22.4	22.8	20.3	21.1	28.3	23.2	25.9	22.8	18.6	21.5	31.6	26.9	31.4	33.6	28.3	30.8	28.3	28.7	0.2	0	1.4	0.1	0.1	4.3	2.9	2.4	4.7	3.9	5	6.5	5.6	7.7	6.2	4.2	7	5.2	6.7	6.4	4.8	4.5	5.1	6.5	4.2	6.4	7.1
hsa-miR-550a-3p	10.5121	2.5	3.2	1.7	22.4	22.8	20.3	21.1	28.3	23.2	25.9	22.8	18.6	21.5	31.6	26.9	31.4	33.6	28.3	30.8	28.3	28.7	0.2	0	1.4	0.1	0.1	4.3	2.9	2.4	4.7	3.9	5	6.5	5.6	7.7	6.2	4.2	7	5.2	6.7	6.4	4.8	4.5	5.1	6.5	4.2	6.4	7.1
hsa-miR-550a-3p	10.5121	2.5	3.2	1.7	22.4	22.8	20.3	21.1	28.3	23.2	25.9	22.8	18.6	21.5	31.6	26.9	31.4	33.6	28.3	30.8	28.3	28.7	0.2	0	1.4	0.1	0.1	4.3	2.9	2.4	4.7	3.9	5	6.5	5.6	7.7	6.2	4.2	7	5.2	6.7	6.4	4.8	4.5	5.1	6.5	4.2	6.4	7.1
hsa-miR-125a-3p	10.353	0.4	0	0	4.6	5.9	5	8.7	6.2	6.1	7	4.1	1.6	3.9	7.7	14.2	11.7	16.7	7.1	11.7	7.5	6.3	1.1	0.8	1	0.6	0.7	6.3	3.6	6	7.7	11	5.5	10.8	9.1	7.9	9.2	7.9	7.2	9.5	7.3	8.4	7.4	7.2	7.2	6.3	6.3	2.1	3.6
hsa-miR-542-5p	10.2136	0	0	0.3	1.4	1.5	3	1.8	4.2	2.7	3.5	3	2.3	3.6	3.1	2.8	3.9	3.4	1.3	2.4	3.2	2.3	0.1	0.3	0.6	0.2	0	0.5	1	4.2	1.9	3	14.4	20.5	19.4	23.4	15.8	15.4	18.5	14.6	17	25.7	11.2	12.1	16.4	13.7	9.4	10.9	10.7
hsa-miR-1306-5p	10.1788	0	0.8	1.7	4.7	4.1	8.4	8.3	8.3	6.9	9.1	9.5	15.5	7.3	10.4	11.9	11.2	10.6	10.1	13.1	15.3	12.5	7	1.8	5.4	2	2.2	2.1	3.2	3.3	3.2	3.7	9.3	17.6	12	11.2	13.8	9.6	11.3	11.8	14.1	12.2	10.6	9	9.6	10.8	10.4	17.9	16.2
hsa-miR-889-3p	10.1394	4.2	2	1.1	0	0.1	0	0	0	0	0	0	0	0	0	0	0	0	0	0	0	0	62.1	73.8	21.8	6.4	15.6	18.7	10.1	11.1	23.6	17.9	0	0	0	0	0	0	0	0	0	0	0	0	0	0	0	0	0
hsa-miR-642a-5p	10.0924	1.1	0.8	0	1.1	1.4	2.6	4.1	4.3	1.9	2.8	3.2	2.3	2.3	3.5	3	3.1	1.4	2	1.4	3	3.7	0.2	0.7	1.2	0.2	0.2	6.7	9	7.8	12.6	12.8	3	3.9	4.4	4	2.3	1.5	3.6	3.9	5.5	4.3	1.8	0.8	3.7	4.4	4	8.9	10.2
hsa-miR-652-5p	9.88182	7.5	8.7	6.7	12.6	11.6	15.5	19.9	30.6	26.3	18.3	33.6	27.6	30.5	11.5	9.9	19.1	8	17	8.2	14.4	21.9	1.6	0.5	4.9	1.2	1.1	14.1	13.3	13.7	9.6	6.8	6.2	8.7	6.8	7.9	6.1	6.2	6	10.3	5.6	9.1	5.6	5.2	4.5	4.1	4.4	3.9	5.2
hsa-miR-654-3p	9.88182	4.5	5.6	2	0.1	0	0	0	0	0	0	0	0	0	0.2	0	0	0	0	0	0	0	5	4.1	7.6	1.7	3.9	49.5	37.1	41.3	39.9	39.8	0	0.3	0	0	0	0	0	0	0	0	0.2	0	0	0	0	0	0.3
hsa-miR-1277-5p	9.47879	4.2	5.2	7.3	0	0.2	0.3	0	0	0.2	0.5	0	0.2	0.4	0	0.3	0.1	0	0	0	0.1	0.1	3.1	10.9	21.7	2.7	7.6	22.2	20.2	17.7	17.9	14.3	14.9	22.3	16.3	16.5	16.9	16	20.9	10.7	18.1	15.6	6.6	7.8	12.7	19.3	13.1	9.8	15.5
hsa-miR-378f	9.47576	3.1	7.1	5.7	4	4	6	5.4	6.8	7.5	6.5	5.8	7	4.3	6.9	6.7	7.3	10.5	6.7	6.3	6	7.9	1.1	0.8	17.9	17	13.1	7.7	4.5	6.4	7	3.8	8.3	9.1	9.7	8.8	7.9	9.2	10.8	12.1	7.9	9.5	10.2	12.7	11.5	8.9	13.3	13.4	9.2
hsa-miR-1270	9.45606	1.9	1.2	4.2	0	0	0	0	0	0	0	0	0	0	0	0	0	0	0	0	0	0	1.1	4	2.1	2.8	1.8	4.3	3.2	4.2	4.5	2	20.3	20.7	17.1	20.7	23	25.6	23.4	21.3	22.6	17.3	12.8	14.1	17.2	25.1	30.9	27	28.2
hsa-miR-3074-5p	9.39091	1.9	2.4	1.4	4.6	4.7	3.6	4.5	3.1	1.9	4	2.7	6.8	4.1	4.5	7.4	6.1	5.6	5.7	6.6	5.8	5.2	0.2	0.1	0.4	0.2	0.3	3.6	1	2.4	2.4	1.8	21.1	15.5	19.6	21.1	21.7	20.3	20.7	18	25	18.3	20.4	19.3	16.1	14.5	9.1	7	8.4
hsa-miR-3200-3p	9.28939	0.4	0	0.6	4	4.7	4.5	7.1	4.7	5.3	6.3	3	9.8	2.1	4.5	7.4	5.2	14.7	5.3	18.7	12	4.9	0.1	0.2	0.2	0.1	0	0.2	0	0.4	1.1	0.2	4.1	4.7	1.7	1.6	2.7	1.7	2.3	1.7	2	4.1	2.6	3.6	3.3	3.5	3.1	1.1	1.3
hsa-miR-624-5p	9.27727	3	1.6	4.5	2.8	4.2	3.8	5.5	4.9	3.6	4.9	3.9	4	3.2	3.1	6.6	8.2	7	3.4	2.8	6.5	5.8	1.4	0.8	2.4	1.3	1.7	2.8	2.5	3.3	3.8	5.3	14.3	23.9	15.7	20.7	16.5	13	16.7	18.1	15.6	22.1	10.4	11.8	11.5	17.1	14.4	33.3	19.7
hsa-miR-548f-3p	9.23485	11.3	11.9	12.2	8.6	10.2	12.2	11.9	15.7	12.9	11.5	12.8	11.3	13.6	22.7	20.5	21.8	12.8	20.4	12.5	20.4	19.8	0.1	0.3	0.7	0.8	0.8	9.4	6.2	6.7	9.3	9	9.6	8	8.6	9	5.3	5.9	6.5	4.7	9	9.1	14.5	14.8	9.2	8	9.7	6	5.1
hsa-miR-548f-3p	9.23485	11.3	11.9	12.2	8.6	10.2	12.2	11.9	15.7	12.9	11.5	12.8	11.3	13.6	22.7	20.5	21.8	12.8	20.4	12.5	20.4	19.8	0.1	0.3	0.7	0.8	0.8	9.4	6.2	6.7	9.3	9	9.6	8	8.6	9	5.3	5.9	6.5	4.7	9	9.1	14.5	14.8	9.2	8	9.7	6	5.1
hsa-miR-224-5p	9.16364	2.3	2	2.2	7.8	10.4	24.8	22.1	13	24.2	37	20.2	23.4	24.5	25.9	20	35.7	18.8	19.8	12.2	16.6	24.1	11.6	10.6	69.5	49.4	38.4	3.5	3.4	2.5	3.4	0.8	0	0	1	0	0	0	0	0	0	0	0	0	0	0	0	0	0
hsa-miR-5000-3p	9.05152	9.8	13.9	15.9	4.6	5.6	5.1	3.9	4.4	3.2	5.6	4.1	3	4.1	6.1	5.8	4.4	4.8	5.2	4.7	5.1	4.8	0.1	0	0.1	0.6	0.3	6	7.9	5.1	7.7	4.7	14.1	15.5	14.6	12	17.4	14.7	12.3	15.5	14.4	17.2	11	10.5	14.8	16.6	32.6	30.1	25.2
hsa-miR-2116-3p	9.02576	6.8	7.1	4.5	2.5	4.6	6	4.3	2.6	3.6	4.9	4.3	2.6	4.1	7.2	6.3	6.1	5.1	6.9	4.4	4.7	5.2	0	0.2	0	0.2	0.1	0.6	0.7	2.5	0.7	1.9	0	0	0	0	0	0	0	0	0	0	0	0	0	0	0	0	0
hsa-miR-874-5p	8.98182	3.8	2.8	2	2.9	3.1	6	4.7	8.8	5.2	4	5.5	6.3	2.8	5.1	5.4	5.7	7.7	5.2	7.1	5	5.3	0.6	0.1	2.1	0.2	1	13.4	12.3	10.1	12.4	10	15.4	13.6	14.2	16.7	16	14.1	19.2	23.9	17.8	14.9	8.4	9.2	9.2	8.9	8.5	7	10.7
hsa-miR-132-5p	8.92879	1.9	3.6	2	0.9	0.6	2.6	3	5.2	2.3	0.5	1.8	0.5	2.3	4.6	3.6	3.2	0.9	4.8	1.9	3.7	3	0.3	0.5	2	0.9	0.7	9.1	11.1	15.9	7.5	13.4	3.4	4.2	5.2	3.1	4.5	4.1	4.7	3.6	3.3	4.6	3	3.1	3.5	3.4	1.3	1.8	1.3
hsa-miR-573	8.90152	0	0	0.8	1.8	1.9	2.6	3.4	4.7	4.2	6.6	1.4	5.9	3.8	4.6	3.5	3.6	3.4	3.8	4.4	4.3	2.1	0	0	0	0.1	0	0	0.5	0.3	0.7	0.6	16.6	20.5	23.3	15.4	15.8	17.1	16.7	16.8	18.4	21.1	18.8	14.9	16.4	17.6	19.8	12.3	22
hsa-miR-212-3p	8.80455	1.1	3.2	1.1	0.9	1.6	3.1	3.7	5.5	3.4	1.6	2.7	2.8	3	5.2	4.6	5.5	2.4	8	1.4	5.4	6.5	0.6	0.3	2.6	0.3	0.1	16.3	13.4	13.6	18.4	19.1	1.6	1.1	2.1	0.8	2.5	2.1	2.8	2.6	2.5	2.3	1.8	2	1.8	1.3	1.3	1.1	1.6
hsa-miR-500a-5p	8.7803	1.5	2	3.4	10	12.6	10.2	10.4	14	11.3	8.8	10.4	9	9.3	8.1	9.5	9.7	9.4	4.8	11.4	10.4	8.3	0.1	0.1	0.8	0.1	0.2	3.5	4.3	6	2.4	1.8	11.2	16.5	12.1	10.1	10.9	10.6	9.7	19.6	16	14.4	12.6	12.3	7.6	6.7	8	6.1	6.6
hsa-miR-618	8.77727	0	0.8	0	24.7	21.3	26.6	25.8	29.6	29	25.8	26.1	22.5	25.1	29.8	29	31.8	28.3	30.2	27.3	28.6	29.7	0.3	0	0.6	0.1	0.2	6.9	7.9	10.7	5.8	9.9	0	0	0	0	0	0	0	0	0	0	0	0	0	0	0	0	0
hsa-miR-29b-1-5p	8.76667	5.3	8.3	7.6	2.5	2.9	5.1	9.3	4.7	6.7	5.9	3.9	5.4	6.4	5.7	5.3	5.6	16.7	4.2	7.9	6.6	7.7	0.5	0.8	2.1	0.8	2.1	2.7	4.2	13.2	10.4	8.3	9.7	8.1	10.1	15.6	10.2	9.2	6.5	6.6	12.3	6.2	9.4	9.8	9.9	9	10.9	14	7.8
hsa-miR-3605-3p	8.67576	3.8	4.8	4.8	3.1	2.1	7.1	5.3	2.9	5.2	6.6	4.5	4	3.9	4.9	6.2	3.8	5.6	6.1	6.3	5.7	4.5	0.1	0	0.1	0.2	0.1	4	3.4	2.2	3.7	3.7	13.5	7.9	9.3	8.9	10.6	10.9	9.8	7.5	5.5	6.9	5.4	6.2	9.7	13	7.4	6	5.5
hsa-miR-486-3p	8.65455	162.6	81.1	44	0.3	0.3	0.1	0.4	0.1	0.1	0.9	0.1	0.5	0.1	0.5	0.2	0.7	4	0.3	1.3	0.5	0.3	12.6	32.7	19.3	31.1	30.1	11.7	13.1	13.9	10.6	12.6	0	0	0	0.1	0	0	0.2	0	0.2	0.1	0.1	0	0	0	0.2	0	0
hsa-miR-320c	8.62273	7.1	7.2	5.6	3.3	3	1.6	1.2	2.3	2.5	2	2.4	2.4	2.6	6.9	4.6	5.7	6.1	7	6.6	7.4	6	28.5	53.9	67.5	114.1	89.8	5	5.9	6.4	5.6	4.7	1.7	2.3	1.7	2.5	2.1	1.6	1.5	1.3	2	1.7	2.3	1.5	2	1.9	2.1	1.1	2.5
hsa-miR-378g	8.60303	0.8	1.5	0.6	1	1.5	6.7	6.5	5.9	6	7.6	5.9	5.4	4.8	6.5	6.7	9.2	8.5	5.9	7.9	7.5	5.3	1.9	2.1	5.7	8.4	7	3.4	4	2.2	2.5	1.3	3.6	3.6	3.9	2	3.7	3.8	3.2	3.1	2.8	2.7	3.6	2.8	2.6	2.7	3.7	4.3	3.1
hsa-miR-1908-3p	8.6	0	0	0	13.7	16.8	16.5	18.1	15.8	15.1	31.6	10.7	25.8	9.6	22.1	24.2	23.2	31.4	17.9	22.9	23.3	10.6	0	0.1	0	0	0.2	0.5	0.2	0	0.6	0.2	10.2	4.5	7	9.6	8.8	10.2	7.6	9.2	8.1	5.8	6.2	3.8	5.3	7.4	3.3	6.7	6.5
hsa-miR-200a-3p	8.43939	60.1	56.1	57.3	2.3	4.2	6.9	8.7	6.1	6	2.8	5.9	3.8	5.6	4.8	5.6	5.8	5.5	3.6	4.1	4.3	4.4	1.1	1.8	8.8	8.5	9.1	10	14.8	8.9	15.2	13.8	4.9	6.3	5.6	7.7	5.9	6.5	5.3	5.6	7.4	7	4.8	3.1	5.5	5.3	4.3	2.8	2.3
hsa-miR-449b-5p	8.41818	1.1	0	1.1	7.6	10	28.3	19.9	30.8	29.8	18.2	19.3	16.7	38.9	29	23.1	24.5	10.4	28.9	12.1	24.9	34.2	0.1	0	0.2	0	0	0.2	0	1.1	0	0	0.5	0.8	0.2	1.6	0.7	0.6	0.2	0.2	0.2	0.8	0.6	0.7	0.5	0.5	0.9	0.4	1.3
hsa-miR-629-3p	8.35152	5.7	6	4.5	2.6	2.4	8.4	10.8	26	10.3	7.3	17.3	9.6	13.1	9.8	8	17.7	6.7	10.7	4.7	8.8	15.4	1.9	0.2	1.6	0.7	0.9	2.3	4.6	6.3	5	6.9	8.6	11.5	6.6	7.9	9.7	5.5	8.1	9.2	10.5	12	6.6	5.9	7.3	6.9	8.7	11.2	9.4
hsa-miR-34b-5p	8.26667	0	0	0	14.5	14.7	31.7	33.3	27.5	33.2	30.2	23.2	32.3	36.2	29.9	23.5	30.9	18.8	20.8	19.1	31.2	33.3	0.1	0.3	0.2	0	0.2	0.7	0.7	1	1.1	1.3	0	0	0.6	0	0	0	0	0	0	0	0	0	0	0	0	0	0
hsa-miR-92b-5p	8.25303	0	0.4	1.1	9.9	9.9	19.5	16	18.2	13.7	15.5	12.9	16.6	16.5	11.5	13.1	11.2	9.9	10.5	15	12.1	11.2	11.8	10.4	2.4	4.2	3.1	0	0.8	0.3	0	0.2	7.6	10.5	9.3	6.7	10.6	10	6.9	10.5	6.2	10.9	11	10.6	9.6	7.9	9.3	4.6	5.5
hsa-miR-3065-3p	8.22273	0	0.4	0	7.3	7.2	13.9	13	16.9	15.1	13.6	15	11.9	12.9	12.3	15	14.2	11.1	14.3	14.1	14.8	12.9	0.3	0.2	0.2	0	0	3.2	1.7	3.2	2.5	1.2	7.5	9.4	8.5	12.2	14.7	8.5	7.2	6	6.7	9.1	3.4	4.1	12.4	12.3	13.3	14.7	14.2
hsa-miR-6503-5p	8.16061	0	1.6	0.6	11.5	9.8	16	20.5	15.8	18.9	14.5	20.2	15.2	21.4	16.6	20	19.8	8.5	23.3	9.2	20	19.7	21.5	29	25.4	73.3	38.2	10	9	6.7	7	8.2	0	0	0	0	0	0	0	0	0	0	0	0	0	0	0	0	0
hsa-miR-766-5p	8.15	0	0.4	1.4	0.3	0.1	1.5	1	0.8	1.3	1.2	0.5	0.7	0.9	1.2	0.6	1.4	1.2	1.7	1	1.2	0.8	44.3	123.2	33.8	61.6	78	1.2	0.7	1	0.5	0.8	5	4.2	5.2	4.3	3.8	4.7	3.9	3.2	5.6	4.9	5	6.5	3.8	5.3	3.9	3.9	3.9
hsa-miR-4440	8.04545	0	0	0	0.8	0.3	0.3	1	0.5	0.8	0.2	1.1	0.7	0.4	0.5	0.7	0.8	0.3	0.6	0.5	1	1	0.1	0.5	1.5	1	0.4	0	0	0	0	0.9	27.1	24.1	22.7	27.2	29.7	23.1	25.3	30.5	26.5	19	19.4	19.4	17.8	12.1	10.2	13.3	9.1
hsa-miR-181b-2-3p	8.03939	1.1	2.4	2.7	5.4	4.1	6.1	4.5	6	4.6	4.2	6.6	5.5	4.5	10.3	7.2	9.5	5.8	10.9	2.1	8.1	7	0	0.6	1.8	0.7	0.7	6.8	9.1	6.9	8.4	8	15.2	17.8	14	12.3	16.1	12.9	13.4	13.3	13.1	17.5	14.4	9.1	9.5	10.8	11.2	5.1	4.4
hsa-miR-548j-5p	8	1.9	0.8	0.7	3.3	4	10.3	12.2	10.3	10.1	14.3	8.6	12.6	9.3	10.7	10.2	10.6	10.9	5.3	10	24.6	11.3	63.1	58.5	60.5	22	21.2	4.1	4.2	5.2	6.3	6.3	2.3	2.1	3.9	2.4	2.4	1.1	1.4	1.2	2.4	2.8	1.4	0.6	2.2	2.7	3.7	9.1	5.8
hsa-miR-19b-1-5p	7.81364	0	0.4	0.8	7.1	6.3	12.9	16	14.8	11.6	10.3	10.4	6.8	15.7	17.7	16.2	16.6	16.9	9.7	12.5	13.4	16.3	0.1	0.1	0.4	0.1	0.3	1.7	1.1	2.9	1.4	2.3	8.3	10	7	10.8	6.5	7.5	7.4	7.9	9.8	14.3	7.2	6.6	3.2	6.1	5.9	2.8	1.9
hsa-miR-627-5p	7.74091	8.7	4.4	10.1	3.7	3.6	8.9	9.7	7.8	8	8.9	10.4	5.4	10.7	10.4	11.5	11.5	13.5	8.4	9.5	11.9	11.6	0	0	0.4	0	0	14.5	12.7	13.2	24.7	15.5	7.3	7.6	8	5.7	4	4.9	7.4	4.7	5.6	7.9	3.8	3.4	5.7	8.3	13.7	23.1	17.5
hsa-miR-144-5p	7.72121	2.3	2.4	21.5	7.1	6.2	10.7	10.1	8.6	9.9	7.3	9.3	6.1	10.7	13.7	9.1	10	3.8	8	2.5	11.3	10.6	55.3	43.5	44.4	23	29.1	16.9	21.7	21	26.7	25.8	0.3	0.5	0.4	1.2	0.9	0.4	0.2	0.4	0.9	1.1	1	0.3	0.5	0.7	0.7	0	0.3
hsa-miR-139-3p	7.60606	0	0	0	0	0	0	0	0	0	0	0	0	0.2	0	0	0	0.2	0	0	0	0	101.7	114.4	19.4	24.6	19.6	0	0.3	0	0	0.4	1.6	0.8	0.4	0.4	0.5	0.2	0.2	0.6	0.6	0.8	0	1	0.5	0.7	0.9	1.1	0.3
hsa-miR-362-3p	7.59848	6	11.5	14.3	3.4	2.2	3	3.2	3.4	2.9	2.8	3.4	3.8	4.3	5.2	4	4.9	1.2	6.9	2.4	4.7	5.8	1.1	1.7	20.6	1.5	4.3	11.8	8.8	8	5.3	4.6	2.4	3.4	2.9	3.7	4.1	3.2	3.2	3.6	5	4.1	2.6	2.1	2.7	2.1	0.6	0.7	0.7
hsa-miR-3187-3p	7.54242	0.4	0	0	1.7	1.6	3.1	1.6	1.8	1.7	1.6	1.6	3	2.6	2.6	1.6	3.2	3.1	1.7	3.2	3.3	2.3	0.7	0.6	0.1	0.3	0.2	0	0.2	0.3	0	0.2	16.6	21.2	18.2	18.1	18.5	17.3	19.3	21.5	16.2	16.3	16.6	11.6	12.6	11	14.2	13.7	11.7
hsa-miR-4485-3p	7.48182	16.6	12.7	13.1	0.7	1.2	0.7	0.2	1.6	6.7	1.4	3	1.6	0.9	1.4	1	1.8	4.6	1.3	3.6	0.7	0.5	0.1	0.1	0.8	0.5	0.5	9	17.1	21.1	13.6	17.7	2.3	4.2	3.1	16.1	13.6	6.4	1.8	4.9	4.4	3.1	0.8	0.8	4.6	5.8	2	8.4	13.6
hsa-miR-411-5p	7.44848	7.5	11.1	5.3	0.1	0.3	0.5	0	0	0	0	0.2	0	0	0	0	0	0	0	0	0	0	14.8	13.8	8.5	6	13	69.9	40.5	47.7	74.4	62.6	0.7	0	74.9	0	0.2	0	0.2	1.9	0	0.2	0	0	0	0.3	0.6	1.4	0
hsa-miR-504-5p	7.44697	0.4	0	0	0	0	0	0	0	0.4	0	0.2	0	0	0.2	0	0.1	0	0	0	0	0	1.1	0.7	0.8	2.2	1.4	0	0	0	0	0	0	0	0	0.2	0	0	0	0	0	0	0	0	0	0	0	0	0
hsa-miR-1228-3p	7.40152	0	0	0	0	0.1	0.3	0	0.3	0	0	0	0.2	0	0	0	0.1	0	0	0.2	0.3	0.1	0	0	0	0	0	0.5	0	0.1	0.5	1.3	0	0.5	0	0	0.2	0	0	0	0.2	0	0.4	0	0	0	0.2	0	0
hsa-miR-548l	7.39697	0.8	1.2	0	1.4	1.6	2.8	1	2.3	1.1	1.6	0.7	1.9	1.7	1.9	1.9	4.4	1	1.3	2.8	3.2	2.7	4.3	3.8	15.2	6.1	5.2	0.1	1	1.1	1.5	1	19.5	14.9	18.8	14.5	17.2	14.9	14.2	12.4	15.9	12.5	6.8	9	14.5	18.1	21.6	16.1	26.9
hsa-miR-4775	7.33636	4.2	6	3.6	10.9	14	18.3	16.4	18.2	13.5	26.7	15.9	15	17.6	29.3	28.1	25.3	11.8	30.9	12.6	24.2	28	0	0.1	1.2	1	0.8	6.4	4.9	5.9	6.8	6.5	2.1	1.8	2.7	1.4	3.2	2.6	0.7	1.7	3	2.1	4.6	3.3	3.2	2.5	1.9	2.8	4.5
hsa-miR-497-5p	7.30303	37.7	31.3	27.4	7.9	9.1	8.1	4.9	5.7	8.4	4.2	6.8	5.2	8.4	9.8	10.8	9.5	16.1	10.7	17.7	14.5	9.3	2.3	2.4	3.7	1.2	2.1	8.5	10.7	6.8	12.1	6.5	3.7	4.2	2.7	4.5	2	3.6	4.7	3.2	5.3	3.6	0.8	0.7	2.4	1.9	3	5.3	6.2
hsa-miR-887-3p	7.26364	0.4	0.4	0	0	0	0	0	0	0	0	0	0	0	0	0	0	0	0	0	0	0	0	0	0	0	0	0	0	0	0	0.2	0	0	0	0	0	0	0	0	0.2	0	0	0	0	0	0	0	0
hsa-miR-502-5p	7.03333	1.9	2.8	0.8	6.2	6.1	11.7	14.2	12.5	10.7	10.1	14.8	14.3	14.1	10	6.1	9.1	7.9	7.8	8.2	7.5	8.9	0.1	0	1.2	0.2	0.2	3.5	3.6	4.6	1.8	4.1	7	10.5	6.8	8.7	5.4	8.7	7.6	14.4	8.4	10.3	9.8	7.8	6.8	5.8	7	5.3	8.1
hsa-miR-320c	7.02879	2.4	2.8	2.6	1.9	2.1	0.8	0.7	1	1.3	0.9	1	1.3	1	4.3	2.8	3.9	3.8	4.6	5	4.3	4	23.3	42.6	63.4	106.3	84	4.4	4	4.7	4.4	3.8	1.6	2.1	1.4	1.6	1.4	1.3	1.4	1.2	1.4	1.2	1.7	1.2	1.4	1.3	0.8	1	1.7
hsa-miR-4745-5p	6.94091	0.4	0	0	1.4	1.5	2.5	0.6	1.3	1.7	2.6	1.1	2.1	2.4	1.4	0.4	1.3	1	1.5	3.5	1.7	1.9	0.5	0.7	0	0.1	0.2	0	0.5	0.7	0	0	20.1	14.2	20	12.8	16	21.3	17.8	23.4	17.5	12.5	12.8	13.1	15.3	15	16.8	12.3	12.6
hsa-miR-670-3p	6.80606	0	0	0	0	0.5	1.2	0	0.5	0.4	0.7	0.7	0.5	0.6	0.2	0.1	0.5	0.7	0.8	1.1	0.7	0.1	0	0	0	0	0	0	0	0	0	0	18.7	16.3	19.4	17.5	13.8	16.2	11.4	15.2	17.8	19.9	14.8	12.7	10.5	12.8	14.8	12.3	9.7
hsa-miR-4461	6.69697	0.8	0	0.8	0.9	3.3	1.8	1.4	2.9	2.5	4.2	1.1	4.2	2.1	2.8	2	2.2	3.2	2.3	3	2.2	2.2	0.1	0.2	0.4	0.1	0.4	1.4	2	1.5	1.1	0.8	7.1	8.7	8.9	12.2	12.2	10.7	7.9	11.2	8.6	6.5	7.2	7.7	7.8	12.3	5.6	31.2	30.1
hsa-miR-184	6.59091	0	0.4	0.3	0.2	0.5	0	0	0.3	0	0.2	0	0	0	0	0.3	0.1	0.3	0.2	0	0	0.1	0.5	0.6	31.3	19.3	19.5	0	0	0.1	0.2	0.6	5	5.5	4.5	9.1	9.5	6.4	8.1	5.8	4.8	8.6	5	5.7	29	38.1	23.7	10.9	6.5
hsa-miR-4662a-5p	6.58333	34.3	38.9	25.4	9.8	10.9	6.6	6.4	8.8	7.2	7	5.9	4.2	4.9	8.8	8.2	7.5	20	11.5	19.4	7	7.6	0	0.1	1.8	0.2	0.1	16.2	10.9	9.6	10.1	11.2	0.2	0.3	0	1.4	0.5	0.2	0.7	0.8	0.6	0.3	0	0	0.3	0.4	0.4	0.4	0
hsa-miR-548d-5p	6.54091	1.9	1.7	1.1	5.4	6.2	6.2	6.1	8.1	8	8.2	6.1	6.8	6.3	9.5	11.7	10.3	7.4	9.1	9.2	10.6	8.1	0.4	0.3	0.9	0.9	0.9	4	3.1	2.7	2.6	2.3	11	10.3	11.6	8.4	9.3	8.6	7.9	8.8	12.3	10.7	5.6	5.9	6.7	8.7	10.2	6.9	5.9
hsa-miR-100-5p	6.43485	105.9	37.7	30.2	3	3.5	1	2	0.3	0.6	2.3	1.1	0.2	2.1	1.5	1	2.2	0.7	1.5	0.5	1.8	1.7	2	1.6	8.9	6.4	4.4	20.3	18.3	30.4	15.7	20.2	0	0.5	5.2	0.2	0.2	0	0.2	0	0	0	0	0.2	0.3	0.1	0	0	0
hsa-miR-548n	6.41667	0.9	1.2	1.8	2.1	2.2	2.1	3.8	3.8	1.8	0.9	3.4	2	3.2	4.5	4.7	4.8	4.5	4.7	2.4	5.8	4.6	0.4	0.6	1.4	0.8	0.4	2.2	1.1	3.1	2	1.1	3.8	3.4	2.1	3.5	3.1	3	1.9	1.1	3	2.2	3.2	1.9	3.2	3.4	4.4	4.4	0.8
hsa-miR-483-5p	6.40909	0.4	0	0.3	0	0.1	0	0.2	0	0.2	0	0	0	0	0.2	0.4	0	0	0	0	0.3	0	0.1	0.2	0	0.1	0.1	0	0	0	0	0	0	0	0	0	0	0	0	0	0	0	0	0	0	0	0	0	0
hsa-miR-1910-5p	6.37727	5.7	6.3	3.9	24.3	27.8	15.2	13.4	8.8	14.5	11.7	7.5	16.2	10.3	22.1	29.5	26.1	25.4	14.5	42.8	37.1	22.6	0	0	0	0	0	0.7	0.5	1.3	0.4	0.6	0.2	0.3	0.2	0.6	0.4	0.2	0.9	0.9	0.3	0.2	0.6	0.2	0.6	0.7	0.2	0.7	0.7
hsa-miR-505-5p	6.24394	1.9	1.2	0.8	1.9	3.1	2.3	4.3	3.6	2.1	3.8	2.7	2.6	0.8	2.9	3.2	2.8	3.2	2.5	4.7	4.7	1.6	28.4	51.8	17.9	52.3	46.4	1.1	1	1.3	1.4	2.5	3.2	3.2	4.1	3.9	2.2	2.1	3.3	1.1	1.7	5.4	4.4	4.4	4	3.8	5	2.5	4.2
hsa-miR-543	6.08182	0	0	0.3	0	0	0	0	0	0	0	0	0	0	0	0	0	0	0	0	0	0	61.3	180.8	36.5	42.4	55	0.6	3.7	2.6	1.8	0.8	0	0	0	0	0	0	0	0	0	0	0	0	0	0	0	0	0
hsa-miR-3928-3p	6.06667	0.4	1.2	0.8	2.8	2.6	2.5	3.7	4.7	3.4	4.7	6.1	5.6	3.8	3.8	3.3	5.5	5.8	4.2	5.9	6.4	5.7	31	39.7	14.8	26.5	24.1	0.7	0	1.2	2.7	2.7	4.1	4.7	4.1	2.4	4.7	5.3	5.3	4.7	4.5	3.8	1.8	1.6	6.2	4.8	5.2	9.5	7.1
hsa-let-7e-3p	6.03636	0	0	0	2.5	5	2.3	3.4	4.9	2.5	4	4.5	2.1	4.1	6.1	4.7	8.1	7.1	3.8	5.1	4	3.6	0.1	0.1	0.2	0.1	0.2	3.8	3.5	4	2.7	3.9	4.5	8.1	5.6	6.9	7	6.6	5.8	5.4	5.3	5.5	4.4	2.5	5.7	6	5.6	2.8	2.9
hsa-miR-4786-5p	6.02576	0.4	0.4	0.3	1.2	1.4	1.3	0.8	0.5	1	0.7	0	0.5	1.1	1.4	0.4	0.5	1	0.6	1.7	1.2	0.9	0	0.1	0.4	0.3	0.4	0.7	0.5	0.8	0.6	0.4	11.4	11.5	12.6	11.8	14.4	16	10	10.5	10.3	12.1	14.2	16.7	14.8	15	16.3	16.1	10.4
hsa-miR-548u	6.00758	0	0.4	0.6	11.3	11.8	8.3	9.2	11.3	9.7	11.1	7.9	8.4	9.3	12.4	11.5	13.8	6.2	10.2	7.8	12	11.9	0	1	2.5	3.1	1.5	2.4	1.3	1.5	1.1	0.3	7.7	10.3	6.2	8.3	7	6.3	4.6	7.4	8.4	7.3	5.8	5.4	5.5	5.5	4.3	1.8	2.3
hsa-miR-3065-5p	5.95606	0	0.4	0	5.7	7	13.6	13.2	6.5	12.4	8.2	9.3	10.5	9.4	9.8	9.4	10	9.9	6.1	13	12.3	5.9	0.1	0.2	0.5	0	0	3.2	0.5	0.4	3.8	1	6.8	5	5	7.9	6.6	8.1	4.7	5.8	4.8	6.7	2.8	3.9	8.3	6.6	6.5	2.5	2.3
hsa-miR-651-5p	5.91212	33.6	22.2	36.9	8.4	8.6	7.1	8.3	7	5.7	7.7	8.9	4.5	7.9	7.5	10.6	10.9	7.7	11.5	5.1	14.4	9	0.9	1.5	6.1	7.5	8.9	22.5	18.2	18.5	19.6	18	0	0	0	0	0	0	0	0	0	0.1	0	0	0	0.3	0.2	0	0
hsa-miR-3158-3p	5.85303	2.6	2.8	3.8	5.5	6.1	9.4	11.4	13.9	9	13.1	10.7	11.2	10.7	11.7	15.5	11	24	14	23	14	11.9	0.3	0.2	0.5	1.1	0.7	3.3	3.7	4	3.9	3.2	2.5	2.8	2.3	2.2	1.9	2.5	1.4	3.2	2.3	1.9	2.9	2.3	3.5	3.2	2.5	5.4	5.2
hsa-miR-3158-3p	5.85	2.6	2.8	3.8	5.5	6.1	9.4	11.4	13.9	9	13.1	10.7	11.2	10.7	11.7	15.5	10.8	24	14	23	14	11.9	0.3	0.2	0.5	1.1	0.7	3.3	3.7	4	3.9	3.2	2.5	2.8	2.3	2.2	1.9	2.5	1.4	3.2	2.3	1.9	2.9	2.3	3.5	3.2	2.5	5.4	5.2
hsa-miR-1537-3p	5.83333	2.6	2	2.2	9.9	9.6	6	9.3	13.8	8.2	8.4	6.6	6.1	7.3	12.9	10.9	12.5	9.4	16.8	11.1	13	12.8	0.5	1.4	3	1.7	1.6	5.3	2.2	2.6	2	3.1	2.9	3.9	2.5	4.1	5.7	2.8	3.7	3	2.8	5.2	3	3.3	1.6	2.1	0.7	0.7	0.3
hsa-miR-4741	5.77424	0	0	0.6	1.2	1	2	1.6	1.8	4	2.8	2.5	2.6	1.7	2	1.7	1.8	3.6	1.7	4.7	5.4	1.8	0.3	2.3	0.4	0.6	0.5	0	0	0	0	0.2	13.6	14.7	11.1	14.4	10.8	13.2	20.4	19.6	12.8	9	4.6	7.5	8.1	10	12	24.5	27.5
hsa-miR-491-5p	5.74697	1.1	0.8	0.8	1.8	2.2	3.3	3	4.7	2.5	1.9	3.2	3	3.2	1.8	1	3	2.4	2.1	1.7	2.1	2.5	0.8	0.3	4	2.1	2.7	0.8	1.3	3.3	1.1	1.7	3.1	3.4	2.9	1.4	2.3	1.5	3.5	3.2	2.5	2.3	2.8	2.3	2.4	1.8	0.7	2.1	1.9
hsa-miR-338-5p	5.73333	0.4	3.2	0.6	11.1	12.7	4	3.4	4.7	5.2	5.2	10.4	3	4.5	8.4	8.9	9.8	5	10.1	2.7	10.9	11.1	0.3	0.3	0.2	0.4	0.7	42.2	32.2	28	37.7	36.1	0	0	0.4	0.4	0.4	0	0	0.2	0	0.1	0	0	0	0.5	0	0	0.3
hsa-miR-29b-2-5p	5.70909	6.4	6	7.3	0.8	0.5	1.7	1.2	0.8	1.3	2.1	1.4	2.3	1.9	1.4	1.9	1.4	1.2	0.8	1	1.2	1.8	1.3	0.2	3.7	0.9	2	5	5.1	5	3.3	4.9	4.1	6	6.2	5.9	2.5	1.5	0.9	2.4	5.5	6.9	4.2	2.9	2.4	3.4	3.9	3.9	4.9
hsa-miR-5683	5.6697	0.8	0	0.6	0.1	0.1	0	0	0	0	0	0	0	0	0.2	0	0	0	0	0	0	0	0	0	0	0	0	2.5	2.9	1.7	0.7	1.6	12.7	16.8	13.8	12.2	12	11.7	14.4	16.5	19	14.8	11	7.8	5.7	10.6	12	10.2	14.2
hsa-miR-4517	5.55758	1.1	1.2	1.7	1.4	2.5	11.4	8.3	17.4	11.8	14.5	6.1	15	9.2	6	3.3	4.6	6.3	4.6	6.8	4.8	3.9	0	0	0	0	0	0.5	1.8	1	0.7	0.6	5.8	5.5	8.5	12	6.8	7	6.3	6.9	10.2	6.1	2.8	3.9	3.2	3.4	4.1	4.9	8.4
hsa-miR-1254	5.50455	0.2	0.8	0.7	3.5	4.3	9	6.9	4.8	7.5	11.4	4.9	6.9	6.2	7.8	4.5	5.8	9.2	3.9	12.9	3.9	5.4	1.8	3	1.5	3.8	3.5	0.5	0.2	0.6	0.4	0.6	7.5	6.6	8.3	7.9	7.5	8.9	7.2	6.8	7.8	5.8	7.5	6	6.1	4.5	3.1	3.7	2.3
hsa-miR-3613-3p	5.46818	2.6	3.6	3.6	10.6	9.7	7.1	4.9	9.1	6.3	5.2	5.5	4.7	4.7	8	7.5	11.7	8.5	7.6	5.7	10.4	5.9	2.8	1.2	10.7	4.8	3.6	18.3	10.9	13.1	9.5	12.4	2.6	2.4	4.7	3.7	1.6	3.4	2.3	1.1	3.9	2.6	2	1.6	2.1	2.6	1.7	0.4	1
hsa-miR-495-3p	5.45	0.4	0	0	0	0	0	0	0	0	0	0	0	0	0	0	0	0	0	0	0	0	164.9	71.3	48.6	24.5	34.8	2.1	1	0.4	0.9	1.7	0	0	0.4	0	0	0	0	0.2	0	0	0	0	0	0	0	0	0
hsa-miR-1254	5.43333	0.2	0.8	0.7	3.5	4.3	8.8	6.7	4.8	7.5	11.1	4.7	6.4	6.2	7.3	4.5	5.6	9.2	3.9	12.7	3.9	5.2	1.8	3	1.5	3.8	3.5	0.5	0.2	0.6	0.4	0.6	7.4	6.6	8.3	7.7	7.5	8.6	7	6.8	7.7	5.8	7.3	5.9	6.1	4.7	3.1	3.7	2.3
hsa-miR-636	5.40606	1.5	0.4	0	3.1	2.1	3	1.6	3.1	1.3	4.2	1.6	4	1.5	2.8	3	2.4	2.9	1.1	5.5	2.1	1.7	0.2	0	0.2	0	0	0.9	0.5	1	0.6	0.4	10.7	10.2	15.3	14	12	13.4	8.4	8.6	11.1	9.6	10.8	10.3	13.7	10.6	6.8	4.9	12.6
hsa-miR-122-5p	5.29697	66.7	47.6	45	0.3	0.6	0.5	0.2	0.5	0	0	0.2	0	0.2	0.2	0.5	0	1.4	0	1.1	0.4	0.3	2.2	0.3	17.9	50.5	82.4	3.1	3.4	1.8	4.4	5.4	0	0	0.2	0.2	0	0	0	0	0	0.2	0	0.2	0.2	0	0	0	0
hsa-miR-590-5p	5.00152	1.1	0.8	2.8	1.8	1.2	6	5.3	6.5	5.7	5.6	6.8	5.2	3.9	6.6	6.6	6.8	3.9	4.2	4.4	6.6	7.1	2.2	4.1	19.9	4.3	7.5	2	5.5	9.3	2.4	2.3	5	7.9	6.2	5.1	4.8	4.9	3.7	3.6	5.9	6.5	4	3.1	4.1	2.1	3	3.5	4.9
hsa-miR-1306-3p	5.00152	1.1	0.4	0.3	2.6	1.9	1.7	1.8	3.9	1.1	1.9	2.7	1.9	2.4	1.5	3.8	2.3	3.4	1.5	4.3	5.5	3.9	23.8	29.9	18.9	20.5	16.3	0.5	0.3	0.8	0.6	1.2	5.7	5.5	5.2	6.3	8.1	8.5	7.6	6.4	7	4.3	6.6	3.8	3.5	5.1	5.4	2.5	2.3
hsa-miR-99a-3p	4.9803	0	0	0	0	0	0	0	0	0	0	0	0	0	0	0	0	0	0	0	0	0	0	0.3	0.3	0	0.1	2.8	2.4	3.6	3.1	4.8	8.8	9.2	10.9	13.4	8.4	7.7	9.5	10.5	7.7	12.1	8	7.8	13.7	11.5	13.9	16.8	14.2
hsa-miR-4448	4.94545	2.3	1.2	3.4	0.1	0.5	0.5	0.6	0.3	0.6	0.2	0.2	0.5	0.6	2.2	1.2	0.8	0.2	1.5	0.6	1.1	0.9	2.7	69.4	22.6	30.9	32.3	1.8	1.2	1.1	3.5	2.5	4.4	3.4	1.7	2.8	2.7	5.3	5.6	5.8	2.3	2.6	1.2	2	2.1	1.6	3.7	1.8	2.3
hsa-miR-145-5p	4.85606	0.8	2	1.1	11.5	10.3	4.8	8.9	10.1	12.2	6.8	9.1	5.6	8.1	6.9	8.2	12	17.3	6.5	9	8.1	10.1	24.8	14.9	32.5	2	8.5	4.1	3.7	3.9	8.2	4.7	0.2	0	1	0.4	0.2	0	0	0	0.2	0.1	0	0	0	0	0	0.4	0
hsa-miR-1276	4.80303	0	0	0	0.7	0.5	1.2	0.4	0.5	0	0.9	0.9	0.5	0.2	1.7	0.4	0.9	0.3	1.1	0.3	1	0.5	0	0.1	0.4	0.2	0.4	0.4	0	1.3	0.3	0.4	9.9	10.2	13.4	9.1	8.4	13.9	9.5	6	12.2	8	11	11.6	10.7	10.9	6.7	2.1	3.9
hsa-miR-3174	4.79697	0	0	0.3	1.6	5.7	4.6	4.3	2.3	4.6	0.9	5	4	2.1	2.8	3.6	2.3	4.8	2.9	3.8	5	3	1.5	0.7	1.4	1.8	1.5	4.5	1.2	2.1	3.8	2.3	3.6	4.5	4.3	4.3	4	3	4	4.1	5.6	4.7	6.8	9	4.3	4.7	4.3	3.2	4.5
hsa-miR-545-5p	4.74242	0.4	2	0.6	2	1.7	2.8	3.7	6.8	5.3	4	4.5	4.5	3.4	5.2	4.6	5.3	3.1	4.4	5.5	4.8	4.4	0	0	0.1	0.1	0.1	2.3	2.4	2.5	3.1	1.2	10.1	8.9	11.3	9.6	10.6	6.2	6.7	6.2	9.4	11.9	7	5.2	5.7	6.2	4.3	2.1	3.9
hsa-miR-1275	4.73333	0	0	0	1.2	1.6	0.7	2	0.8	0.4	1.2	0.9	0.5	0.6	3.7	2.5	2.5	1.7	1.7	2.5	1.8	2.6	29.3	74.9	3.2	2.3	4.6	0.8	4.7	3.9	5.1	2.1	2.3	5	3.9	4.7	4	5.8	2.8	2.4	3.4	5	4.2	2.9	3	3.1	4.6	4.9	0.3
hsa-miR-511-5p	4.71818	0	0.4	0	0	0	0	0	0	0	0	0	0	0	0	0	0.1	0	0.2	0	0	0	0	0	0	0	0	19.1	11.7	11.4	21.7	25	0.5	0.3	0	0	0.2	0.4	0.2	0.2	0	0.2	0	0	0	0.3	0.4	0	0.3
hsa-miR-5010-3p	4.5803	5.7	4.8	5.6	3.5	4.2	4.3	3.4	7	7.4	3.5	8.9	5.9	7.9	2.8	4.5	4.8	2.9	2.9	3.2	4.4	5.6	0	0	0.4	0.1	0	2.8	2.4	1.8	3.5	1.7	2.1	3.4	1.4	0.6	1.8	1.7	1.4	1.5	3.3	2.5	2.4	0.3	2.2	1.3	1.3	1.4	1.9
hsa-miR-3942-5p	4.57879	3.8	1.6	1.4	6.1	5	4	3.4	2.6	3.8	6.3	4.3	4	3.8	5.1	5.8	4.1	4.1	6.1	3.6	5	5.4	0.1	0.2	0.3	0.7	0.4	1.9	1.9	1.5	1.4	1.5	11	7.6	5.8	8.7	8.8	7	7.2	7.5	6.9	9.4	8.8	8.2	6.5	6.9	5	3.9	3.6
hsa-miR-371b-5p	4.56364	0	1.2	0.3	4.9	6	10.3	10.4	9.4	12.2	6.3	8.6	3.5	7.3	14.7	14.2	11.8	10.6	13.7	3.3	12.8	12.4	2.3	1.9	5.4	7.8	5.3	20.2	17.4	17.9	18.3	22.4	0	0	0	0	0.4	0	0	0	0	0	0	0	0	0	0	0	0
hsa-miR-548au-5p	4.56061	3.4	3.6	2.8	1.4	1.5	1.6	2.3	1.8	1.1	1.9	1.8	1.9	1.4	3.7	3	3.2	1.9	2.7	2.3	3.1	3.4	0.2	0.3	0.7	0.1	0.4	6.2	8.7	11	6.9	5.6	8.8	8.1	6.8	8.9	7.9	6.8	7.7	2.2	14.1	6.5	3.5	5.2	7	8.2	4.8	3.4	4.1
hsa-miR-1278	4.48485	0.8	2	1.7	1.2	0.5	1.2	1.2	2.3	0.8	1.2	0.9	0.2	1.3	2.2	1.4	1.8	1.4	2.1	0.8	1.8	2.5	17	13	25.2	34.8	35.5	1.7	2.4	0.6	1.5	1.6	3.6	5.8	5.2	3.9	4.8	4.3	3	4.3	4.8	5	4.4	4.3	6.2	5.2	5.4	6	2.9
hsa-miR-627-3p	4.46515	8.7	6.3	7	3.1	3.7	4.6	2.4	4.2	2.7	3.5	3	4.2	4.3	8.3	5.4	9.1	7.7	11.1	5.5	7.5	3.9	0.1	0.2	1.8	1.8	2.6	6.3	6.8	7.8	6.7	7.2	4.2	4.7	6.4	5.1	5.4	4.1	4	3.2	6.7	3.7	5.6	3.6	2.1	3.2	1.5	0.7	1.9
hsa-miR-3614-5p	4.43939	4.9	1.6	2.8	2	1.5	3.5	1.2	0.5	2.7	1.4	0.9	3.8	1.3	2.9	1.5	1.4	3.4	3.8	2.2	3.7	1.9	1.8	2.7	4.6	9.5	3.2	44.9	33.6	15.8	33.2	41	0.8	2.1	0.8	0.2	1.3	0.9	0.7	1.7	0.8	0.6	0.6	2.5	1.1	1	1.9	2.5	1.3
hsa-miR-23b-5p	4.4197	0	0	0.3	0.1	0.4	0.3	0.4	0	0	0.2	0.2	0.7	0.2	0.8	0.4	0.3	0.3	0.4	0.8	0.4	0.3	87.9	78.9	25.3	34.9	44	0.3	0	0	0	0.2	0.8	0.8	0.4	0.2	0.2	0.2	0.9	0.2	0.5	0.1	0.4	0	0.2	0.3	0	0.7	0
hsa-miR-3150b-3p	4.41212	73.7	52.2	50.2	1.9	1.5	1.8	2.8	1.8	1.9	4.2	2.3	6.4	1.9	2.8	2.8	2.7	9.2	3.5	7	2.1	1.6	0.9	1.6	2.9	2.6	3	2.4	8.6	7.9	4.7	5.7	0	0	0	0	0	0	0.2	0.2	0	0	0	0	0.2	0	0	0	0
hsa-miR-4687-5p	4.36364	0.4	0.8	0.6	1.9	3.1	1.5	0.6	3.4	2.3	2.1	1.6	1.4	1.7	1.8	1.9	2.3	5.1	2.1	1.9	1.8	2.3	0.2	0.1	0.4	0.2	0.1	2.3	2.2	1.7	1.6	2.1	8.1	10.5	9.5	7.7	7	9.2	9.1	16.8	8.7	9.9	8.2	7.8	8	10.4	12	9.1	9.1
hsa-miR-7704	4.33485	0	0	0	1.2	1.5	0.8	0.6	0.8	1.1	0.5	0.2	1.4	0.9	3.8	3.8	3.3	3.6	6.1	4.3	3.2	3.5	0	0	0.2	0.2	0.3	3.4	8.5	5	9.2	11	0.7	1.6	1.7	1.8	1.3	1.1	1.8	0.8	0.5	0.8	0	1	1.4	2.2	1.3	6.7	6.2
hsa-miR-4518	4.31818	0.8	0	0.3	1	0.9	2.2	1	4.7	2.9	2.6	1.6	3	1.9	1.5	1	2	0.5	1.7	0.6	1.1	0.6	0	0.2	0.2	0.2	0.1	0.8	0.2	0.4	0.3	0.6	6.5	8.1	7.8	10.8	7.7	6.2	5.8	8.4	9.7	10	7	5.1	5.9	4.1	3.3	3.5	7.4
hsa-miR-18b-5p	4.27727	4.5	1.4	2.4	2.7	3.7	2.8	2.1	2.9	1.4	1.2	3.1	0.4	2.7	6.8	4.8	5.3	4	6.6	2.4	6.1	7.1	1.5	1.6	15.7	3.4	3.6	2.1	3	1.1	1.9	0.9	1.6	2.9	1.9	1.8	2.9	1	2.8	3.4	3	3.6	2.1	1.4	1.3	1.2	1.6	0.7	2.1
hsa-miR-196a-5p	4.27121	0.4	1	0.3	4.8	4.7	8.3	6.6	7.9	8.1	7.9	6.7	7.7	5	7.4	6.3	6.3	4.2	6.3	4	10.5	6.6	0.8	0.8	1.1	0	0.2	6.8	3.8	6.5	6.7	5.7	5	4.1	6	3.5	3.9	3.8	2.7	2.3	2.6	3.7	3.8	3.4	3.3	3	2.6	4.6	1.5
hsa-miR-551b-3p	4.12273	0	0	0	0	0	0	0	0	0	0	0	0	0	0.5	0	0.1	0.2	0.2	0	0	0	0.9	1	2.7	1.7	2.1	0.8	0.5	0.8	0.2	0.2	2.8	2.9	2.1	2.2	2.2	1.7	3.2	4.5	1.7	3.4	2.8	2.1	3.2	2.9	2	2.5	3.2
hsa-miR-133b	4.12121	0	0	0	0	0	0	0	0	0	0	0	0	0	0	0	0	0	0	0	0	0	0.5	0.4	2.3	0.2	0.1	0	0	0	0	0	0	0	0	0	0	0	0	0	0	0	0	0	0	0	0.1	0	0.2
hsa-miR-485-5p	4.11818	0.4	0	0	0	0	0	0	0	0	0	0	0	0	0	0	0	0	0	0	0	0	104.1	125.3	10.9	8.1	11.8	0	0	0.3	0.3	0	0	0	0.2	0	0	0	0	0	0	0	0	0	0	0	0	0	0
hsa-miR-643	4.11667	1.9	2	2.2	6.7	7.7	3	3	3.9	3.1	4.7	1.4	3.3	1.3	5.5	6.6	4.8	5.5	3.6	6	3.5	2.7	0.7	1.6	2.1	3.4	2.6	3.7	2.4	1	2.5	2.1	5.7	8.9	6.4	4.7	5.9	6.4	7.2	6.2	6.7	6.1	4.8	1.8	2.9	2.5	1.9	0.7	1.6
hsa-miR-642a-3p	4.10909	0	0.4	0.4	0.8	1.2	2.5	3.2	6.5	3.6	4	4.5	1.9	2.3	4	3.8	3.5	1.2	6.5	1.2	5.2	3.2	2.5	3.2	2.6	0.7	1.8	2.1	1.4	3.1	2.1	1.6	1.8	2.4	2.5	2.4	2.7	2.7	3.7	2.1	3	3.4	3.6	3.8	3.2	4.3	1.9	3.9	1.8
hsa-miR-4767	4.07121	9.8	6.7	4.8	1.2	0.9	2	3	2.1	2.7	6.3	2	3.3	3.2	2.8	2.8	3	5.3	3.2	5.2	2.2	2.3	0	0.6	0	0.1	0.2	1.6	2.9	1.9	4.7	6.2	3.1	3.4	2.3	5.3	3.4	3.4	2.1	2.6	3.9	2	0.6	2.8	1.9	2.1	1.9	1.1	1.9
hsa-miR-1290	4.06515	0	0.4	0	0.2	0.6	0.1	0.1	1	0.1	0.2	0.2	0.2	0.4	0.6	0.6	0.6	5.3	3.4	6.2	1.9	1.7	1.5	0.2	0.7	0.3	0.1	7.8	7.4	7.6	7.8	12.1	0.2	0	0.5	0.2	0.4	0	0	0	0.1	0.1	0	0.6	0.1	1	0.6	1.6	1.5
hsa-miR-619-5p	4.03636	0.8	0.4	0.8	2.1	2.8	1.6	1.9	1.8	1.5	2.6	2.7	1.9	2.5	2.2	2.7	2	3.1	3.4	3.8	1.4	1.7	4.9	2.9	5.3	6.6	6	5.5	7.9	9.9	5.9	8.2	3.3	2.9	4	3.3	2.2	3.2	2.5	3	3.8	4.2	2.8	4	4.9	3.6	2.6	2.5	5.2
hsa-miR-6718-5p	4.01667	0	1.2	0	5.4	6.8	14.5	13.6	14.5	14.5	12.4	14.5	7.7	15	11.4	19.3	20.3	12.1	21.2	9	17.8	14.3	0	0.1	2.4	2.2	1.5	3.8	2.2	2.5	2.2	1.7	0	0	0	0	0	0	0	0	0	0	0	0	0	0	0	0.4	0
hsa-miR-7976	4.00303	0.4	1.6	2.2	2.9	3.4	4.1	3.4	5.2	3.8	4.7	4.1	2.6	1.1	4.5	4.2	4.2	6	5.2	3.5	4	3.6	0	0	0	0.2	0	1.6	1	1.8	1.3	1.9	10.6	8.9	8	8.5	6.8	8.3	4.6	6.4	8.6	6.4	7.2	3.6	4.1	2.7	3.3	1.4	1.9
hsa-miR-664b-3p	4	22.2	9.1	19.6	2	2	1.8	1.2	4.4	1.5	1.9	3.6	1.6	2.4	4	1.9	4.3	0.7	2.9	2.1	1.1	3.7	1.3	0	4.5	0.7	1.7	10.6	10.6	19.9	11.3	14.8	1.1	1.8	1.9	1.4	3.1	0.4	0.9	0.8	2.7	2	2.4	1.1	1.3	1.4	2	0.4	0.7
hsa-miR-3934-5p	3.95303	3	0.8	0.3	0.5	0.9	0.5	1.4	2.1	1	1.2	0.7	0.5	0.9	0.5	0.7	1.7	0.7	0.6	0.3	1.2	0.9	2.4	4.4	8.3	6.5	11.2	3.9	4.6	2.4	3.8	2.9	9.6	7.6	7.4	8.9	8.1	6.4	8.8	11.2	8.7	7.2	1.8	3.6	4.5	6.7	7.6	3.9	5.2
hsa-miR-1285-5p	3.94242	0.4	1.2	0.6	3.3	2.3	3.8	4.3	3.9	4.4	4.7	5.9	3	3.9	6	5.4	4.6	4.8	2.7	4.1	5.2	5.2	0.5	0.2	1.6	0.2	0.9	3.4	2.2	2.9	3.3	1.9	5.8	5	7.2	5.3	5.4	5.5	5.6	5.4	4.5	3.6	2.6	5.3	4.1	3.2	3.5	5.6	7.8
hsa-miR-452-5p	3.89545	0.4	0	0.6	2.9	4.7	11.6	9.3	4.4	9	5.2	6.1	5.2	6.9	10.4	6.3	9.3	7	8.6	4	11.5	9.6	51.9	19.4	24.6	11.6	9.9	0.2	0.3	0.1	0.3	0.2	0	0	0	0	0	0	0	0	0	0	0	0	0	0	0	0	0
hsa-miR-4457	3.89091	0	0	0	0.1	0.1	0.5	0.2	0.8	0.6	0.2	0.2	0.2	0	0.3	0.1	0.3	0	0	0	0.1	0.3	0	0	0	0	0	0.3	0	0.1	0.4	0	8.6	10.5	9.7	13	12.6	9.2	8.4	9	10.6	10.6	5.6	5.2	8.9	9.1	5.6	5.6	13.6
hsa-miR-885-3p	3.83182	0	0	0	0.1	0	0	0	0.3	0	0	0	0	0.2	0	0	0.1	0.2	0	0	0	0	0.6	0.5	0.4	0.2	0.3	0.2	0	0	0	0	0.3	0.5	0.8	0.4	0.4	0.9	0.4	0.4	0.8	1.2	0.8	1.6	1.3	0.5	0	3.5	0.7
hsa-miR-499a-5p	3.80758	6.8	5.2	8.7	0.4	1.1	0.3	0.4	0.3	0.4	0.5	0.5	0.5	0.4	0.9	0.6	1.1	0.3	0.4	1.3	0.7	0.9	15.4	9.9	31.5	24.1	30.6	3.9	4.1	0.7	3.3	3.1	3.1	3.4	2.5	2.2	3.2	3	2.5	3	3.3	3.3	1.2	1.8	1.3	2.2	1.3	0	1
hsa-miR-3661	3.80606	2.6	1.2	2.2	3.2	3.5	2	1.2	2.9	1.7	2.1	2.3	1.4	3	2.9	3.8	3.2	2.9	2.5	2.5	4	3.5	0.3	0.5	0.1	0.2	0.2	1.4	1.9	1.1	3.1	2.9	5.4	5	5.6	5.1	9.7	6	6.3	4.9	5.5	5.6	3.6	4.3	7	9.3	12	10.2	8.7
hsa-miR-5001-3p	3.76667	3.8	2.8	6.7	2.3	2	3.6	2.2	3.4	3.1	0.9	2.3	1.6	3	2.6	1.1	2.7	2.2	2.9	1.7	2.9	3	0	0	0.5	0.2	0.2	5.5	5.3	5.7	5.5	6.3	4.4	4.2	6.4	4.3	5	5.3	3	5.1	6.9	6.9	3.2	3.6	3.8	3.5	2.2	3.2	2.3
hsa-miR-3127-5p	3.74545	3.4	0.4	0.8	1.4	2.3	2.3	2.8	4.2	2.1	1.9	1.4	4.2	2.1	2.9	3.1	3.2	4.3	3.1	3.5	3.3	2.8	0.3	1.4	3	3.5	2.7	2.6	3.2	0.8	1.6	2.7	6.5	5.2	2.9	5.5	5.4	5.1	3.5	6.2	5.6	6.3	4.8	6	6.4	9.1	7	8.4	3.9
hsa-miR-429	3.67879	4.2	9.1	12.6	5	4.8	4.1	3	1.6	2.7	3.8	3.6	2.3	5.3	4.9	3.6	4.8	3.1	3.8	2.2	4.1	4.4	0	0.5	0.6	0.4	0.5	5.9	4.4	6.4	4.6	4.4	3.2	4.5	4.3	3.1	4	2.1	2.8	3.7	4.8	4.2	1.2	2.5	5.6	4.1	2.2	0.7	1.9
hsa-miR-660-3p	3.65152	0.8	0.8	1.1	1	1.2	2.3	1.4	2.1	1.9	0.9	0.7	1.4	1.1	2.5	2.4	3.3	2.1	3.1	2.1	3.2	2.1	0.2	0.9	3	4.5	3.1	2.9	2.9	1.5	0.9	1.3	2.1	3.9	1	2.4	2.5	3.4	1.9	2.1	3	2.3	1.8	1.3	2.1	1.4	1.3	1.8	2.3
hsa-miR-34a-3p	3.62576	0.8	0	0	1.8	1	1	0.6	0.8	0.6	1.2	1.4	0	0.4	2.2	2.6	1.4	0.5	0.4	0.6	2.4	2.3	0.2	0.1	0.3	0.3	0.6	1.6	1.4	3.3	2.2	0.8	0.3	0.5	1	0.6	0.4	0	0.5	0.4	0.6	0.2	0	0.5	0.2	0.1	0	0	0
hsa-miR-212-5p	3.59848	1.1	2	0.8	0.9	0.9	3.6	4.1	3.9	2.7	2.1	5.7	1.6	3.6	3.7	2.8	3.3	0.7	3.4	0.6	3.5	3	2.4	1.5	2.1	1.7	2.1	7.4	6	7.2	4	9.2	1.3	1.6	0.8	1.2	1.4	1.3	0.5	0.6	1.3	0.3	0.6	0.8	1.1	1.2	1.1	0	0
hsa-miR-548w	3.58485	2.8	9.9	7.2	2.6	2.8	4.6	4.1	6.6	2.8	4	3.2	2.5	2	5.5	4.9	7.1	6.1	4.2	6.2	6.4	6.6	0.4	0.9	1.8	1.3	2	5	5.1	5.4	3.5	4.9	3.5	4.7	4	3.5	1.9	3.2	2	2.3	6	3.3	2.3	2.2	1.3	1.2	1.8	1.7	1.4
hsa-miR-3690	3.56061	0.4	0.6	0.3	3.6	2.9	3.3	3.1	4.3	1.9	4.2	2.7	2.3	1.6	2.2	2.4	3.1	3.7	1.8	2.8	3.5	2.3	14.8	5	26.6	70	41.8	4.2	3.8	2.6	2.8	4.3	0	0	0	0	0	0	0	0	0	0	0	0	0	0	0	0	0
hsa-miR-3690	3.56061	0.4	0.6	0.3	3.6	2.9	3.3	3.1	4.3	1.9	4.2	2.7	2.3	1.6	2.2	2.4	3.1	3.7	1.8	2.8	3.5	2.3	14.8	5	26.6	70	41.8	4.2	3.8	2.6	2.8	4.3	0	0	0	0	0	0	0	0	0	0	0	0	0	0	0	0	0
hsa-miR-144-3p	3.53636	0.8	3.2	10.9	1.9	2.4	1.5	1	1	2.1	1.6	0.2	0.7	1.9	2.8	2.5	3.8	0.5	3.6	0.2	2.8	2.7	14.8	34.6	10.9	7.7	8.9	25.6	28.7	21.9	13.6	10.1	0	0.5	0.2	0	0.4	0	0	0.6	0.5	0.2	0.4	0	0.2	0.4	0	0	0
hsa-miR-301b-5p	3.51818	0	0	0	0.4	0.2	1.2	0.4	1.3	1.5	0.7	0.5	2.3	0.2	0.8	1.5	0.9	0.7	0.2	1.3	1	0.5	0.5	0.2	0	0.1	0.2	0.2	0	0	0	0	6.8	17.3	10.1	6.7	7.5	5.3	7.2	8.4	8.7	13.7	12	11.9	9.4	6.6	6.1	3.2	5.5
hsa-miR-3157-3p	3.50152	4.5	9.9	4.5	5.4	5.2	5.3	3.7	2.3	7.4	3.3	3.9	4	5.8	5.8	6.3	5.3	7.7	3.6	8.2	6.6	5.7	0	0	0	0.1	0.1	4	3.9	2.9	3.6	2.5	4.5	3.4	3.5	4.1	3.4	3	1.9	3	3.9	4.2	2.2	2	3.7	2.7	0.6	1.8	2.9
hsa-miR-3177-3p	3.48485	1.5	0.8	0.3	1.4	2.6	0.7	1.4	1.6	1.9	0.2	1.4	1.2	1.9	3.2	1.9	2.7	1.5	2.1	4.9	2.4	1.7	1.4	3.8	1.3	1.5	1.5	1.6	1	0.4	2.2	0.8	4.2	5.8	1.7	4.5	4.1	4.3	4	5.1	2.5	3.3	1.4	2	2.7	3.6	5.9	4.2	3.9
hsa-miR-365b-5p	3.46667	0	0.4	0.3	0.5	1	2	1.6	1.3	1.9	3	1.4	1.6	1.3	0.8	1	1.4	0.9	1.9	1.1	1	1.2	2.6	7.3	3	4.3	4	0.2	0.7	1.4	0.9	2.7	0.2	0.5	0	0.2	0.5	0	0.2	0.4	0.2	0.3	0	0.3	0.3	0.5	0	0	0
hsa-miR-3939	3.44545	1.1	0.4	0.6	6.6	5.7	3.6	3.4	3.9	4.6	4.7	3.2	6.1	4.3	4.8	5.6	6.3	7	5.2	9.2	8.8	3.6	0	0.1	0	0.1	0	0.8	1	0.4	0.2	0	2.8	6	2.5	3.1	3.1	2.6	2.8	5.6	4.1	3.8	2	2.8	2.6	2.9	2.8	2.8	1
hsa-miR-211-5p	3.43939	0	0	0	1.9	2.7	2.2	3.6	6	3.6	0.2	6.6	1.4	3.4	4.3	3.1	4.1	0	6.3	0.5	5.1	5.5	0.1	0	0.1	0	0	0	0	0	0	0	0	0	0	0	0	0	0	0.2	0	0.2	0	0	0	0	0	0.4	0
hsa-miR-4772-5p	3.42424	0.4	0.4	2	0	0	0.2	0	0	0	0.2	0	0	0	0.2	0.1	0.3	0.2	0	0.2	0	0	1.9	0.9	4.4	1.3	1.8	36.2	29.1	24	51.2	41.8	0	0	0	0	0	0.2	0	0	0	0.1	0.2	0	0	0.5	0	0	0.7
hsa-miR-1538	3.4	0	0	0.3	2.2	1.6	1.7	2.4	0.8	3.1	2.3	1.6	2.8	1.9	1.8	1.9	3.4	2.9	1.7	2.7	4.1	2.8	0.5	0.5	0.4	0.3	0.2	1	1	0.1	0.6	1	3.7	2.1	4.1	2.6	4.5	4.1	4.9	5.1	5.3	4.2	5.2	4.7	6.4	5.7	6.8	13.3	11.7
hsa-miR-153-5p	3.39848	0.4	0.4	0	0.4	1.9	4.1	4.1	2.9	2.7	3.3	1.6	2.8	1.9	2.9	2.6	2.2	2.6	1.9	2.2	2.8	3.7	0	0	0.1	0	0	0.9	0.2	0.1	0.7	0.4	6.7	5.5	8	6.7	6.5	4.7	4.2	7.3	10.8	9.8	6.2	6.2	4.8	3.5	4.6	7.4	4.9
hsa-miR-3120-3p	3.37879	0.4	0	0	0.2	0.1	0	0	0.3	0.2	0.2	0.5	0.5	0	0.3	0.1	0.3	0.2	0.4	0.5	0.3	0.3	100.4	52	11	20.2	21.1	0.4	0	0.3	0.2	0.4	0.3	0.5	0.6	0.2	0.2	0	0.2	0.2	0.6	0.3	0.2	0	0.5	0	0	0.7	0.3
hsa-miR-6516-3p	3.35	47.9	43.6	56.7	0.9	0.5	0.2	0.8	0	0.2	0.2	0.2	0.5	0.6	0.5	0.4	0.3	0.3	0.4	0.3	0.8	0.8	1	0.6	2.2	1.8	3.5	1.7	0.5	1.4	1.5	1.3	1.6	1.6	1.4	2.2	2.3	0.9	0.7	0.9	0.8	1	0.4	0.8	1.3	0.1	0.7	0.4	1.3
hsa-miR-4523	3.35	0	0.4	0	0.5	0.4	0.5	0.2	0.8	0.4	1.6	0.7	0.9	0.4	0.6	0.7	0.8	0.7	0.8	1.1	2.6	1.2	0	0	1.1	0	0.1	0	0.3	0	0.5	0.2	6.2	6.3	5.4	8.3	6.3	5.8	8.6	7.9	10.2	7.5	6.8	7.4	9.4	4.8	3.5	3.2	4.2
hsa-miR-188-3p	3.3197	0	0	0.3	3.7	4.2	2	2	1.3	2.3	0.7	1.6	2.6	1.5	4.5	2.2	2.3	3.9	4.8	2.7	4.1	2.7	0	0	0.3	0	0.1	1.3	3.7	2.6	0.4	1.3	4.1	6.3	4.1	5.7	4.5	3.4	5.5	7.1	6.6	6.5	4.4	2.8	2.7	2.7	1.1	1.1	2.6
hsa-miR-296-3p	3.27576	0.4	0	2.2	0	0	0	0	0	0.4	0.2	0	0	0	0	0.1	0	0	0	0	0	0.4	1.5	4.4	1.5	1.5	2.6	1.5	1	2.1	1.8	0.8	1.1	0	0.6	0.2	0.4	1.3	0.5	0	0.6	0.2	0.2	1	0	0.5	0.4	2.5	1
hsa-miR-1291	3.25303	5.7	4	6.7	0.3	0.2	0.7	0.2	1.8	1.1	0.2	0.5	0.5	1.5	1.2	0.5	0	0.3	0.2	0.8	0.3	0.1	18.9	23.5	8.7	10.9	23.2	6.2	5.4	6.1	2.9	6.4	2.8	1.8	3.1	3.9	2.7	2.6	1.4	2.1	4.1	3.1	1	2.9	2.6	2.9	1.1	1.1	4.5
hsa-miR-548o-5p	3.24242	2.8	3	3	3.4	4	3.2	4.1	3.6	3.4	5	3.5	3.5	2.6	6.7	5.8	5.5	6.1	4.8	5.3	5.9	4.4	0.4	0.5	1.2	0.2	0.5	3.6	5.5	4.6	4.3	3.8	3.6	2.9	3.4	2.6	2.9	3.1	2.8	1.7	5.3	2.7	1.8	1.2	2.2	1.6	1.6	0.5	1.6
hsa-miR-548c-5p	3.24091	2.8	3	3	3.4	4	3.2	4.1	3.6	3.4	5	3.5	3.5	2.6	6.7	5.8	5.5	6.1	4.8	5.3	5.9	4.4	0.4	0.5	1.2	0.2	0.5	3.6	5.5	4.6	4.3	3.8	3.6	2.9	3.4	2.6	2.9	3.1	2.8	1.6	5.3	2.7	1.8	1.2	2.2	1.6	1.6	0.5	1.6
hsa-miR-1273h-5p	3.19697	6.8	5.2	7.6	4.1	2.7	5.6	5.5	5.7	4	4.9	4.1	5.4	4.7	6.8	6.1	7.5	5.5	3.8	4.5	5.5	6.8	0.6	1.7	5	3.8	3.6	2.9	3.4	1.9	4	4.1	0.2	0.4	0.2	0	0.2	0.2	0	0.2	0	0.2	0	0	0.3	0	0.1	1.4	1
hsa-miR-4511	3.16818	1.1	0.8	2	3.9	5.7	4	3.6	5.7	5.9	4.7	6.6	6.6	3.8	4.5	8.2	6.3	7.2	7.3	7.4	6.8	5.8	0.2	0.5	0.6	1	0.6	1.7	0.7	1	1.5	2.1	2	3.7	0.6	3.7	2.5	0.9	1.9	2.1	1.7	2.6	3.2	3.3	2.4	3.5	3.9	1.4	4.2
hsa-miR-548b-5p	3.13636	0.1	0.1	0.1	11.8	14	3.2	3.7	4.4	6.8	8.1	4.8	5.3	6.3	9.2	7.2	12.7	9.3	6.6	13	8.8	8	0.7	0.9	0.7	1.2	1.2	1.3	2.4	1.4	1.4	1.5	1.1	1	0.7	1.2	0.3	0.8	0.6	0.6	0.4	0.7	0.3	0.4	0.9	0.8	0.7	1.4	1
hsa-miR-15a-3p	3.1197	0	0.4	2	3.5	4.7	2	1.6	2.3	1.9	0.9	2.7	2.6	2.3	4	2.7	5.7	2.7	4.2	1	4.4	3.5	0.5	0.3	3.9	0.8	1.1	1	1.2	2.9	1.1	0.6	3.1	7.1	7.2	7.7	5.2	4.9	4	3	3.9	5.8	3.8	2.8	4.5	3.6	2.8	5.6	2.3
hsa-miR-4473	3.09697	0.8	0.4	0.8	0	0	0	0	0	0	0	0	0	0	0	0	0	0	0	0	0	0.1	0.2	0.3	0.8	0.2	0.1	0.5	0.8	1.4	0.9	1.1	8.3	7.9	4.7	8.1	8.1	7	6.2	5.8	8	7.2	4.4	3.1	8.4	7.9	4.4	2.8	5.2
hsa-miR-2355-3p	3.08333	0.4	3.2	3.9	2.8	3.8	3.1	2.4	3.9	2.9	2.1	1.6	2.6	1.3	3.7	3.1	4.3	2.4	3.8	3	2.4	2.7	6.5	11.6	17.2	13	13.4	2.1	2	2.1	1.2	3.6	2.1	3.4	2.1	2.4	1.3	2.3	0.9	1.9	2.3	2.3	1.2	1.3	2.4	1.3	1.1	1.1	1.6
hsa-miR-422a	3.0803	0.1	0.2	0.3	0.6	0.7	1.4	1.5	1.2	1.2	2.5	1.1	0.9	0.8	2.2	2.7	2.6	3	2.2	3.8	2.2	2.2	0.2	0.1	0.6	1	0.9	1.3	0.1	0.3	0.8	0.6	3.1	2.3	3.5	2.7	4.3	3.1	3.3	4.9	3.3	2.7	4.3	4.1	4.1	3.4	4.4	4.9	4.7
hsa-miR-548ay-5p	3.07273	0.9	0.7	0.6	2.1	2.3	1.5	2.9	2.1	2.9	3.2	2.6	2.8	2.3	4.6	5.1	5.1	2.5	3.9	4.7	5	4.3	0.4	0.3	0.9	0.9	0.9	2.5	1.6	0.9	1	1.8	4.3	5.3	5.5	4.9	4.4	3.4	4.3	2.7	5.5	5.6	3	2.4	4.2	6.1	5.1	4.8	4.2
hsa-miR-1226-3p	3.06061	1.9	0.4	0.3	1.2	0.9	0.8	0.2	0.8	0.6	0.9	0.2	0.5	0.9	1.1	1.2	1.1	1.7	0.8	1.9	1.5	1.9	0	0	0.3	0.1	0.4	0.7	0.2	0.8	0.7	0.6	5.8	4.7	5	4.7	3.4	3	5.8	9.9	6.6	4.9	3	2.9	3.3	2.6	2.4	5.6	5.8
hsa-miR-2277-3p	3.05303	1.5	1.6	0.8	3.7	4.4	3.8	3	4.2	2.9	2.3	3.6	3.5	2.3	2.6	4.9	3.2	4.3	6.3	4.3	3.6	3.9	0.5	0	0.5	0.2	0.6	2.3	1.5	0.8	2.2	1.8	3.4	2.1	2.5	3.7	2.9	1.9	3.5	2.2	3.4	2.5	1.2	1.6	2.7	3.9	3.1	2.5	7.4
hsa-miR-3619-5p	3.05303	0	0	0	6.7	7.4	13.4	8.5	10.1	17	16.4	9.8	16.2	11.8	9.5	7.8	7.4	12	6.5	18.3	9.8	10.6	0	0	0	0	0	0	0	0	0	0	0	0	0	0	0	0	0	0	0	0	0	0	0	0	0	0	0
hsa-miR-103a-2-5p	3.05152	2.3	0.8	0.3	2.5	1.6	1.7	0.8	1.6	0.8	1.9	1.6	1.9	0.7	2	1.2	1.6	1.2	1.1	1.2	1.1	0.8	4.3	2.3	13.9	4.2	4.3	3.1	3.5	6	2.4	2.1	2	3	5.3	4.5	3.9	3.4	4.3	9.2	4.8	7.2	3.4	2	3.2	3.1	2.2	1.8	3.6
hsa-miR-1292-5p	3.03939	1.1	1.6	0.3	0.3	0.7	1.2	1	2.6	2.7	2.8	0.7	2.6	2.3	0.8	1.5	1.5	0.5	1.5	1.4	1.2	1.2	2.8	4.2	2.4	2.7	3.8	0	1.4	0.3	0.3	0.4	4.5	6.6	4.5	5.7	6.1	5.3	5.6	3.4	4.2	4.3	1.6	3.3	2.7	4.8	5.6	6.3	5.5
hsa-miR-6511b-3p	3.02273	1.3	0.8	0.6	1.6	1.2	2.2	2.6	2	3.5	1.2	2.4	3.4	1.6	1.7	1.4	1.9	2.2	1.7	2.1	1.8	1.7	0.4	0.2	0.2	0	0	1	1.6	0.6	1	0.7	3.9	5.6	3.4	3.6	4.2	5.1	3	6.1	4.4	5.7	4.3	3.8	4.5	5.8	4.3	7.7	5.7
hsa-miR-296-5p	3.00758	1.9	6	6.7	0	0.1	0	0	0	0.2	0	0	0	0	0.2	0	0	0.2	0	0.2	0.3	0	3.1	0.5	2.1	0.6	0.1	5.3	2.7	2.4	3.1	6.5	0.5	0.5	1.7	0	0.2	0.6	1.1	0.2	0.6	0.2	0	0.5	0.3	0.3	0.7	0	0.3
hsa-miR-1537-5p	3.00455	0.4	0	0.3	11.1	9.8	7.6	5.1	6	7.4	7.3	8.6	6.3	8.4	7.5	10.5	9	5.8	10.7	6.6	12.6	9.2	0.1	0.2	2	1.4	0.4	1.1	2.5	1.8	1.7	3.2	1.1	0.5	1.2	1	1.1	0.4	1.2	1.1	2	1.2	1.4	0.8	1	0.8	0.7	2.1	0.7
hsa-miR-3684	2.97727	0	0	0.3	0.4	1.1	1.7	1.4	1.6	2.9	2.1	2.3	1.6	0.8	2	2	1.5	2.4	2.1	3	2.4	1.8	0.1	0.2	0.7	0.9	0.8	1.1	0.3	0.3	0.2	0.2	3.1	6.8	6.2	7.7	5.7	4.3	6.2	4.3	5.6	4.9	7.6	7.5	6.5	4.1	3	7	4.2
hsa-miR-943	2.95303	0.8	0	0.3	1.4	1	1	0.4	1	1.1	0.7	0.9	1.9	0.6	0.6	0.6	0.5	1.7	1.3	1.1	1	0.8	0.1	0	0.3	0.2	0.3	0.7	0.5	0.4	0.2	0.2	8.4	6.3	7.4	5.1	7.2	5.8	8.4	8.2	6.7	6.4	6.2	5.9	6.8	5.3	5.9	4.9	3.6
hsa-miR-873-3p	2.91364	0.4	0	2	6.8	7.8	2.6	0.8	1	1.1	1.2	1.6	2.1	2.3	1.4	2.7	2.4	3.2	2.7	4	3.9	1.3	0.7	0.7	5.3	0.6	0.8	19.7	27.3	30.9	19.7	34.8	0	0	0	0	0	0	0	0	0	0	0	0	0	0	0	0	0
hsa-miR-141-5p	2.88636	6.4	3.6	7	2	3.1	2	1	3.6	1.3	1.9	2.5	0	0.6	3.8	2.5	2.2	2.4	5.5	0.8	1.8	1.8	0	0	0	0	0	1.2	2.5	1.3	5.2	5.7	3.2	6.8	4.1	3.5	4.3	3.6	4.4	4.9	3.9	4.4	3.8	2.3	3.2	3.5	3.1	1.4	3.2
hsa-miR-1255a	2.86818	0.4	7.1	4.2	0.2	0.1	0.3	0.4	0	0	1.2	0.5	0.2	0.2	0.2	0.4	0.3	0.3	1	0	0.4	0.6	5.6	13.1	10	11.1	13.3	1.1	1.9	2.9	1.7	1	2	0.5	2.1	0.8	1.1	1.5	1.1	1.7	1.3	2.3	3.4	3.6	4	2.9	1.3	1.1	1.6
hsa-miR-548am-5p	2.84394	2.6	2.9	2.5	2.8	3.3	2.3	2.7	2.9	1.8	3.2	2.4	2.3	2.1	5.3	4.3	4.4	4.9	3.3	4.4	5	3.5	0.4	0.5	1	0.2	0.5	3.8	5.4	5.7	3.8	4.8	3.2	2.5	3	1.9	2.6	3	2.2	1.5	5	2.5	1.3	1	1.7	1.3	1.6	0.5	1.3
hsa-miR-4424	2.81667	43.7	35.7	69.3	0	0	0	0	0	0	0	0	0	0	0.2	0	0.1	0	0	0	0.1	0.3	0	0	0.3	0.2	0	3.5	3	2.8	1.8	1	1.3	0.5	0.8	0.8	0.9	0.9	0.7	0.6	1.1	0.6	1.2	0.8	1	1.3	0.7	1.1	0.7
hsa-miR-500b-5p	2.81515	0.9	1.2	2.4	3.7	6.3	2	2	3.6	2.3	1.8	2.6	0.8	2.5	2.7	2.9	3	2.6	1.4	3.4	2.8	2.7	0.1	0.1	0.7	0.1	0.2	2.3	2.7	4.1	1.6	1.2	3.2	3.3	2.6	3.5	3.1	3.4	3	7	3.8	3.7	3.4	3.7	2.7	2.1	1.9	1.6	1.5
hsa-miR-1304-5p	2.81364	0	0.8	0.3	0.5	0.5	0.5	1.2	0.5	0.8	0.9	0.7	1.6	0.4	0.9	1.5	1.1	1.4	1.5	1.6	1.7	1.2	0.8	0.3	0.1	0.5	0	1.2	0.5	0	0.2	0	5.5	6.8	5	7.3	6.3	4.3	4.2	7.1	6.1	8.1	5.8	7.4	4.3	3.9	5.9	3.9	2.9
hsa-miR-3074-3p	2.81212	0	0.8	0.6	5.4	5.9	2	2.2	3.4	2.1	3	2.7	4.7	1.1	2.8	3	3.2	3.2	2.7	3.5	2.8	3.6	0.3	0.5	0.3	0.6	0.4	2.3	1	0.7	1.4	0.4	4.4	4.2	4.3	6.5	5.9	4.3	4	5.2	5.2	3.8	3.4	1.8	2.6	2.7	1.9	2.1	2.6
hsa-miR-877-3p	2.81212	0	0	0.3	0.2	0.4	0.2	0	0.3	0.6	0	0.2	0.5	0.4	0.6	0.1	1.3	0	0.4	0.3	0.3	0.4	0	0	0.1	0.2	0	0	0.7	0.1	0.4	1.1	4.5	3.7	3.1	2.2	2.7	1.5	3.5	3.7	3.9	4.5	2	2.3	2.6	5.6	4.3	8.1	6.2
hsa-miR-4504	2.7697	0.8	0	0	0.1	0.1	0	0	0	0.2	0	0	0	0.2	0.2	0.4	0.1	0.2	0.2	0	0	0.3	0	0.1	0.6	0.4	0.3	0	0	0.1	0.6	0	6.5	7.3	7.4	4.9	3.8	8.1	7	6.9	4.1	5.1	6	6.2	6.4	5.8	8	8.1	7.4
hsa-miR-5096	2.75152	0.4	0.8	0.6	1	0.7	1	0.6	1.3	1.1	1.4	1.1	0.9	0.4	1.7	1.6	1.1	2.7	3.1	1.6	1.8	2.1	0.2	0.3	0.4	0.7	0.1	10.9	9.2	10.8	8.1	8.9	1.3	3.2	1.7	1.8	2.5	2.6	2.1	2.2	2	2.6	2.2	2.6	3.2	2.2	1.9	4.6	7.1
hsa-miR-382-5p	2.75	0	0	0	0	0	0	0	0	0	0	0	0	0	0	0	0	0	0	0	0	0	49	94.8	5.8	1.6	1.9	1.2	2	3.7	7.4	4.7	0	0	0.4	0	0	0	0	0.2	0	0	0	0	0	0	0	0	0
hsa-miR-219a-5p	2.72121	0.4	0.4	0.4	1.5	0.7	1.6	2	3.1	1.6	2	1.9	1.6	0.8	2.3	1.5	2.3	1	2.2	1	2.2	3	0.2	0.3	0.5	0.1	0.2	1.1	0.4	0.1	0.3	0	4.8	4.3	5.6	4.6	4.1	3.4	3.3	2.5	6.2	5.5	6.4	5.3	4.1	4.5	2.4	0.7	1.5
hsa-miR-1248	2.70909	40	29.7	34.4	0	0.6	0	0	0.8	1.5	0.5	0.2	0.2	0.6	0.2	0	0	0.3	0	0.5	0	0.4	0	0	0.2	0.1	0	4.7	3.9	1.1	3.2	2.1	0	0.3	0.6	0.2	0.2	0.6	0	0	0.2	0.9	0.4	0.8	0.6	0.1	0	0.7	0
hsa-miR-1226-5p	2.70152	0	0	0	0	0.6	0.7	0.8	0	0.8	1.2	0.5	0.9	0.6	0.3	0.7	0.3	0.3	0.4	0.3	0.6	0.9	0	0	0	0	0	0	0	0	0.2	0.4	7.5	6.3	5	3.5	4.1	5.5	5.1	12.2	8.4	7.5	3	4.1	3.7	4.4	8.9	9.5	8.4
hsa-miR-487b-3p	2.68636	0	0.4	0.3	0	0	0	0	0	0	0	0	0	0	0	0	0	0	0	0	0	0	25.9	19	39.3	5.1	8.7	7.9	4.7	3.6	8.1	4.8	0	0	0.2	0	0	0	0	0	0	0	0	0	0	0	0	0	0
hsa-miR-4435	2.65758	0	0	0	3	3.8	1.2	1.7	2	1.4	2.6	2.2	2.6	2.1	2.1	2.2	2.7	3.4	2.8	6.4	2.4	3	3.7	1.8	0.5	0.5	0.6	0	0.2	0.6	0.2	0.7	5.5	4.1	4	3.4	4.8	4.7	5.5	6.4	3.2	4.1	3	3.4	4.2	6	7	6.3	4.4
hsa-miR-4435	2.65758	0	0	0	3	3.8	1.2	1.7	2	1.4	2.6	2.2	2.6	2.1	2.1	2.2	2.7	3.4	2.8	6.4	2.4	3	3.7	1.8	0.5	0.5	0.6	0	0.2	0.6	0.2	0.7	5.5	4.1	4	3.4	4.8	4.7	5.5	6.4	3.2	4.1	3	3.4	4.2	6	7	6.3	4.4
hsa-miR-34b-3p	2.65	0	0	0	5.4	6.2	7.6	4.9	7.3	9.3	6.1	6.8	6.3	10.3	8.8	6.4	11.5	7	6.3	9.2	7.7	10.5	0	0	0.2	0	0.1	0.5	0	0	0.2	0	0	0	0.2	0	0	0	0	0	0	0	0	0	0	0	0	0	0
hsa-miR-624-3p	2.64242	0	0	0.8	2.3	2.5	1	0.4	1.3	1.7	1.9	1.1	0.9	1.9	2.3	1.6	2.2	1	2.3	0.8	1.4	2.5	0	0	0	0.1	0.1	0.4	0.7	0.3	1.3	0.4	6.5	5	4.1	5.5	6.5	6.4	3.5	5.8	6.2	5.6	3	2.3	3.7	2.3	5.4	2.5	2.6
hsa-miR-485-3p	2.6303	0.4	0	0.3	0	0	0	0	0	0	0	0	0	0	0	0	0	0	0	0	0	0	64.1	56.1	9.1	4.5	10.2	2.6	2.4	2.1	4.2	3.7	0	0	0.2	0	0	0	0	0	0	0	0	0	0	0	0	0	0
hsa-miR-1294	2.62273	2.3	2.4	8.1	0.6	0.1	0.7	0	0.3	0.4	0.5	0.7	0.2	0	0	0.6	0.5	0.9	0.2	1	0.4	1.3	4.3	2.5	5.7	1.7	2.3	3.5	1.4	0.6	1.4	2.5	4.4	5.2	3.5	4.3	3.8	4.3	3.5	4.1	4.7	3.8	3.2	2.3	4.1	2.2	2.2	1.1	4.9
hsa-miR-219b-3p	2.61364	0.4	1.2	0.6	2.2	1	1.7	0.8	1.8	1.3	0.9	1.6	1.6	2.1	0.6	1.5	2.3	1.5	0.8	1.4	2.1	1.8	0.6	1.9	2.8	2.4	2.4	0.4	0.9	0.8	0.7	1.1	6.5	4.2	6	5.3	4.3	2.6	5.5	3.6	3.9	4.9	7.8	8.7	5.4	4.9	4.3	3.9	5.5
hsa-miR-942-3p	2.60455	0	0.4	1.1	0.9	1	1.3	2.8	1.6	1.9	2.6	1.4	1.2	1.5	4.1	3.7	2.8	2.7	2.7	1.3	2.4	1.7	0.3	0.1	0.3	0.1	0.3	0.5	0	0.1	0.4	0	6.3	6	6.4	5.7	5.2	5.3	4.2	3	3.3	6.1	4.4	4.3	4	4.3	2.8	2.5	1.6
hsa-miR-3188	2.59091	0.4	0.8	0.6	0.7	0.5	0.7	1	0.3	0.6	0	0.2	0.7	0.9	0.6	1.1	0.3	0.2	1.7	2.5	0.6	0.6	0.8	0.2	0	0.2	0	0	0.5	0.1	0	0	4.7	3.2	2.5	2.8	2.3	4.3	4.6	3.7	4.5	5.4	4	5.7	2.6	4.1	4.3	6.3	3.9
hsa-miR-937-3p	2.56818	0	0.8	0.3	1.3	1.6	2.3	1.2	1.6	1.7	2.8	3.2	4	2.3	2.6	2	2.4	1.9	3.1	3.3	2.6	4.1	0	0	0	0	0	0.7	0.5	0	0.9	0.4	3.7	2.1	1.7	1.6	4.1	3.4	3.3	4.5	2.3	1.9	4.2	4.7	2.9	3.2	3.3	10.9	3.2
hsa-miR-433-3p	2.55	0.8	0	0	0	0	0	0	0	0	0	0	0	0	0	0	0	0	0	0	0	0	33.2	71.7	24	12.8	21.1	0.5	1.7	0.3	0.9	1.3	0	0	0	0	0	0	0	0	0	0	0	0	0	0	0	0	0
hsa-miR-4638-3p	2.54242	1.1	0.4	2	0.5	1.4	0.5	0.4	0.8	1	0.9	0.2	0.7	0.4	0.2	1.2	1.1	1.4	0.4	1.9	1.1	1.6	0.2	0.3	0.2	0.2	0.3	0.5	1	0.8	1.4	0	4.5	3.9	2.3	6.3	6.3	3.8	4.2	4.1	5.5	6.3	4	6.5	5.4	5.4	4.8	9.8	8.1
hsa-miR-4781-3p	2.47727	8.3	5.2	5	5.2	3.4	4.6	2.6	2.3	4.6	4.7	2.3	1.9	6	4.9	3.2	4.2	4.3	5.3	6.2	4.7	3.6	0.2	0	0.4	0.2	0.3	3.9	3.1	2.4	3	4.2	2	1.1	1.2	1.4	1.3	0.4	1.8	0.6	1.1	1.7	1	1.8	2.2	1.2	1.5	2.8	1.6
hsa-miR-494-3p	2.46212	0.8	0	0	0	0	0	0	0	0	0	0	0	0	0	0	0	0	0	0	0	0	61.7	30.8	21.5	8.6	17.9	1.9	3.6	3.8	5.5	5.9	0	0	0.2	0	0	0	0	0	0	0	0	0	0	0	0	0	0
hsa-miR-664b-5p	2.45758	6	2.8	7	0.8	0.5	0.3	0.4	1	0.6	0.7	0.7	0.5	1.7	0.8	0.4	0.5	0.5	0.6	0.8	0.7	0.8	23.4	31	14	14	16.2	2	0.8	2.4	1.6	0.9	0.3	0	0.4	0.4	0.5	0	0	0.6	0.5	0.5	0.8	0.3	0	0.3	0.2	0	0
hsa-miR-129-5p	2.45303	0.8	1	0.1	2.1	2.2	2.3	1.4	2	2.7	0.9	1.1	1.4	4.2	3.9	4	3.8	2.6	3.2	5.1	5.1	4.2	0	0	0	0	0	0	1	0.5	0.2	0.3	4.2	4.1	4.2	3.6	3.4	3.9	4	3	3.4	3.8	2.5	2.5	3.9	3.5	3.7	4.4	5.3
hsa-miR-129-5p	2.45152	0.8	1	0.1	2.1	2.2	2.3	1.4	2	2.7	0.9	1.1	1.6	4	3.9	4	3.8	2.9	3.2	5.1	5.2	4.2	0	0	0	0	0	0	1	0.5	0.2	0.3	4.2	4.1	4.2	3.6	3.4	3.7	4	3	3.4	3.8	2.5	2.5	3.6	3.5	3.7	4.4	5.3
hsa-miR-155-3p	2.45	0	0.8	0	1.1	1.2	4.3	5.3	6.5	5.2	3.5	5.9	4.7	2.6	8.3	4.9	6.2	2.7	8.6	2.2	5.4	4.3	0.1	0.1	0.3	0	0.1	0.5	3.2	19.3	1.1	3.5	0.7	1.8	1	0.6	1.3	1.3	1.8	0.6	0.8	0.8	1	0.5	0.3	0.1	1.1	0.7	0
hsa-miR-3173-5p	2.43636	2.6	2	1.7	0.9	0.5	1.8	2	0.8	0.4	2.1	0.9	1.9	1.5	0.9	1.6	0.9	1.9	2.1	1.7	1.4	1	0.1	0.1	0.1	0.5	0	0.8	1	0.1	1.1	0.2	2.6	2.6	1.4	3.1	3.2	3.6	3.3	3	2.2	2.9	2.8	2	3.7	1.6	2.6	2.8	4.5
hsa-miR-30c-2-3p	2.42273	0.4	0	0	0.5	0.4	1.8	1.2	2.1	1.3	0.9	1.8	1.9	1.1	0.9	1.7	2	1.4	2	3.2	1.3	1	0.8	1.1	0.6	0.4	0.2	0.3	0	0	0	0	0	0	0.2	0	0	0.1	0	0	0	0	0	0	0	0	0	0	0
hsa-miR-4482-3p	2.40606	7.9	0.8	0.3	0	0	0	0	0	0	0.2	0	0	0	0.2	0	0	0	0.2	0.3	0	0	0	0	0	0	0	16.8	11.9	8.5	13.1	13.9	0.2	0	0	0.2	0	0	0	0.2	0	0.1	0.2	0	0	0.4	0.4	0	0
hsa-miR-1286	2.40303	0	0.4	0	3.5	5	4.8	3.9	4.2	5.5	5.6	2.3	5.9	1.7	7.2	11.1	10.6	11.1	7.1	9.3	16.4	8.4	0	0	0.4	0.7	0.2	0.9	0.3	0.3	0.2	0.2	0.8	1.3	0.6	0.8	0.4	2.1	0.4	0.2	0.8	0.9	1	0.7	1.1	1.3	0.9	0.7	2.3
hsa-miR-193b-5p	2.39545	0.4	1.2	0	0	0	0	0	0	0.4	0	0	0	0	0	0	0	0	0	0	0	0.1	4.4	20.6	5.7	5.4	8	1.1	0.5	1.3	0.4	1.7	2.9	1.8	2.9	3.3	1.1	2.8	2.8	1.5	3.4	3.5	3.4	2.8	2.1	2.2	2.6	0.4	0.3
hsa-miR-1284	2.39394	1.1	0.4	0	4.6	4.4	4	4.7	3.6	5	5.2	5.5	4	3.8	6.1	6.1	7	5.8	5.5	5.7	6.2	5.9	2.9	1.8	4.4	8.4	6.6	0.7	0.9	0	0.5	0.6	2	2.6	1	2.2	1.3	1.3	1.2	0.6	1.1	1.4	0.4	1.3	1.6	0.8	0	2.1	0.3
hsa-miR-136-3p	2.39394	2.3	2.4	0.8	0	0	0	0	0	0	0	0	0	0	0	0	0	0.2	0	0	0	0.4	0.2	1.2	0.5	0.2	0.4	33	24.3	30.8	29.9	24	0	0	5.6	0	0	0	0	0.2	0.2	0.1	0	0	0	0	0	0	0
hsa-miR-4787-3p	2.35152	0	0	0.3	0.3	0.6	0.3	1	0.5	0.6	0.5	0.7	0	0.9	0.8	0.4	0.4	0.2	1.1	0.6	0.6	0.6	0.8	0.6	0.1	0.2	0.2	0.8	3.6	3.2	0.5	1.3	1.1	1.3	1.9	2.2	1.6	1.3	1.4	2.4	1.4	1.7	1	1.5	1.8	1.8	2	3.5	1.6
hsa-miR-197-5p	2.34697	0	0.4	0.3	0.8	1.2	3.3	3.4	2.3	4	3.3	0.9	2.1	2.6	2.3	4	2.7	3.8	2.3	2.5	3.2	3.4	8.7	10	1.7	1.2	0.5	0.9	0.3	0.6	0	0.2	1.8	3.4	3.9	2.6	2	2.6	1.4	2.4	1.7	3.2	2.8	2.1	2.2	2.5	1.3	1.1	0.7
hsa-miR-4510	2.33182	0.4	0	0.3	0.4	0.2	1.3	2	1.3	0.4	0.4	0.6	1.5	0.5	0	0	0	0.2	0	0	0	0.1	0.6	0.7	1.5	1.7	3.5	0.8	0	0	0.7	0.4	3.7	3.8	1.9	3.8	5.6	4.5	2.9	4.1	2.2	3.3	4.7	3	3.8	3.4	1.4	3.3	2.3
hsa-miR-186-3p	2.32727	1.1	0	1.1	2.7	2.4	3.3	3.2	4.4	3.1	4.5	1.8	4.5	3.2	3.8	4.5	4.1	3.4	3.2	4.6	6.4	6.1	0.7	0.7	1.8	1.7	3.8	0.7	0.5	1	3.7	2.5	3.1	2.1	4.1	1.8	1.1	2.1	1.6	0.4	3.1	3.2	0.4	1.5	1.1	2.9	2.4	4.9	3.6
hsa-miR-1295a	2.30758	1.9	6.3	0	0.1	0.3	0.2	0	0	0.4	0.2	0.7	0	0.6	0.5	0.6	0.1	0.7	0.4	0.5	0	0.3	0	0	0.3	0.3	0.3	0	0.3	0	0	0.4	1.5	0.3	0.4	1.6	0.4	0.6	0.7	1.3	1.6	0.8	1	0.7	0.6	0.8	0.7	1.1	1.3
hsa-miR-3157-5p	2.30606	1.9	0.4	2	2.5	4.8	2.5	1.8	2.1	1.1	2.1	3.9	3.3	3.6	3.8	3	3.4	3.8	2.5	4.1	2.9	3	0.1	0	0.4	0.2	0	0.3	1.2	2.4	1.3	2.1	2.1	3.9	2.1	3.7	2	1.5	2.8	2.8	4.1	3.2	4.4	2.5	1.9	2.9	1.7	1.1	0.7
hsa-miR-3150a-5p	2.30455	0.8	0	0.3	1.2	0.6	2	1	1.8	1.7	3.3	3.2	0.7	0.8	1.2	2.4	0.9	2.6	1.5	1.9	2.5	1.2	0	0	0.2	0	0.4	0	0.6	0	0	0.4	5.5	6	3.9	5.7	5.2	4.9	7.2	3.6	6.2	3.5	2.6	1.6	4.5	3.8	3.9	4.6	5.2
hsa-miR-4761-3p	2.3	0	0.8	0	0.7	1	1	0.6	0.8	0.4	0.7	0.7	0.9	0	0.5	0.3	0.5	1	0.4	1	0.7	0.8	0	0	0.1	0.2	0	0	0.3	0.1	1.1	0.4	3.9	4.2	4.7	6.9	4.5	3.2	6.3	7.1	5	6.1	5.2	3.1	5.1	4.4	3.5	1.4	1.9
hsa-miR-1299	2.29697	0	1.2	1.7	0.1	0.1	0	0	0	0	0	0	0	0.2	0.3	0	0.5	0	0	0	0	0.1	3.5	0.6	0.3	1.3	1	4.7	2.9	1	4	2.4	2.1	3.2	1.2	3.7	4	3.2	1.4	2.6	2	3.6	0.8	1.3	2.9	1.9	2	0.7	1.6
hsa-miR-939-5p	2.28788	0.8	0.4	0.3	1.6	3.3	2.5	3.2	2.1	3.1	2.6	1.8	5.6	3.8	2.6	1.4	3.3	2.9	3.4	2.5	3.2	2.5	0	0.1	0.2	0	0.1	2.1	0.7	0.3	0.7	2.5	2.9	3.2	2.5	2.6	2	3.8	2.8	3.2	3	3.5	1.6	1.1	1.4	2.6	3.3	2.8	2.9
hsa-miR-3662	2.28485	0	0	0	0.3	0.1	1.2	1.4	1.6	0.8	1.6	0.5	3.5	0.8	0.3	1	2.4	1.7	1.3	1	0.6	0.8	0	0	0	0.1	0	0	0	0	0	0	5	4.5	4.7	5.9	6.5	4.5	5.8	8.4	5.3	3.6	5.8	4.3	4.1	3.1	5.4	6.7	7.4
hsa-miR-3605-5p	2.28182	1.5	2	1.7	0.5	1.7	2.2	1.2	1	1.5	1.9	2.7	2.3	2.4	1.4	1.7	0.9	0.7	2.9	1	1.7	1.2	6.2	5	3.8	4.3	4.2	1.2	1.2	1.4	0.6	0.2	0.8	0.8	1.2	0.6	0.2	1.5	0.4	0.9	1.3	1.4	1.2	1.3	1.9	0.5	1.3	0	0
hsa-miR-548j-3p	2.2803	0.8	0.4	0.8	3.7	5.2	2.3	2.8	4.2	1.5	2.8	2	1.4	1.9	4.3	3.6	5.7	3.9	3.1	2.5	4	2.7	0.1	0.8	2.9	2.6	2.5	3	1.4	2.2	0.9	1	3.6	2.1	4.3	3.3	1.8	2.1	1.9	2.2	4.8	3.6	2.6	1.3	2.2	2.1	1.5	1.1	0.7
hsa-miR-375	2.26515	0.4	0	0.3	3.5	3.1	0.8	1.4	0.3	0.6	1.2	0.9	0.7	0.9	1.2	1.4	1	1.4	1.5	1.6	1.2	1	0	0.1	0.4	0.2	0.1	0	0	0.4	0.2	0.8	2.9	3.7	3.3	2.6	4.3	3.6	3.3	3.4	3.4	2	4	3.3	4	3	2.6	5.6	4.5
hsa-miR-196a-5p	2.26061	0.4	0.6	0	2.1	1.5	2.5	1.9	2.3	3.3	2.9	2.3	2	1.6	3.7	3.3	3.2	2.5	3.7	2.1	4.1	3	0.9	1	1	0.1	0.2	2.5	2.1	2.9	3.2	2	2.6	2	4.3	2	2.4	1.9	1.3	1.4	1.5	2.9	2.8	2.5	2	1.6	1.9	2.5	1.1
hsa-miR-3940-3p	2.25909	1.1	1.6	2.8	2.9	1.3	1.5	1.2	1.3	1.3	2.8	1.8	2.1	2.1	1.8	1.2	2	3.1	1.9	1.9	2.9	1.8	0.1	0.5	0.5	0.4	0.6	2.4	1.4	0.4	1.3	1.7	2.8	4.5	2.1	3.1	2.9	2.6	2.5	2.1	3.8	3.8	2.4	0.8	3.2	4.4	2.2	2.1	1.6
hsa-miR-708-5p	2.25606	7.9	10.3	60.9	0.4	0	0.2	0.6	0	0.2	0.2	0	0.7	0	0.3	0	0.3	0.7	0	0.8	0.3	0.1	2.3	5.4	1.7	1.5	1.1	10.5	8.5	16.7	5.8	5.1	0	0	0.2	0	0	0	0	0	0	0	0	0	0	0	0	0	0
hsa-miR-3944-3p	2.23939	0	0.4	0.6	0.6	0.1	1	1.4	0.5	1.7	0.9	1.6	1.4	1.5	0.6	1.5	1.9	1	1.3	1.3	2.5	0.9	0	0	0	0	0	0.3	0.2	0.1	0.4	0.4	3.2	2.9	4.3	3.9	3.6	5.1	2.3	3.7	4.1	4.5	10	6.4	4.9	6.5	4.8	6.7	8.4
hsa-miR-4645-3p	2.22273	8.7	7.5	7	2.3	3	1.8	1.8	2.3	1	1.2	1.1	0.5	1.5	0.9	1.6	1.1	1.2	2.1	1.4	1.2	2.7	0	0.9	0.6	1.8	1.8	10.7	10.7	14.3	13.6	12.1	0.3	0.5	0.6	0.2	0.7	0.2	0.2	0.2	0.3	0.3	0.2	0.3	0.5	0.4	0.6	0.7	0
hsa-miR-374c-5p	2.21364	0.9	1.3	0.8	0.1	0.2	6.3	4.3	5.7	5.9	7.1	4.2	4.3	5.1	11.5	10.9	11	9.1	7.9	8	9.7	9.8	0.3	0.2	0.5	0.1	0.1	0.1	0.1	0	0	0	0.1	0	0	0.1	0	0	0.2	0	0.1	0.1	0	0	0	0	0	0	0
hsa-miR-615-3p	2.20152	0.8	0.4	1.1	1	1.7	1.8	1.2	0.3	0.2	3.3	0.9	1.2	1.5	2.2	2.1	1.8	1.2	2.1	1.1	2.2	1.9	0	0	0	0	0	1	0.5	0	1.1	0	5.2	6	6.2	5.5	4.1	4.5	3.3	5.4	7	4.5	4	3.4	2.2	3.8	3.3	1.8	4.2
hsa-miR-6511b-3p	2.18939	1.3	0.8	0.6	0.8	0.4	1.2	2.2	1.4	2.2	0.9	1.3	2.9	1.2	1.5	1.2	1.8	1.2	0.8	1.3	1.5	1.1	0.4	0.2	0.2	0	0	1	1.1	0.6	1	0.5	3.1	3.8	2.2	2.3	3.1	3.4	2.5	2.7	3.1	4	2.7	2.2	3.3	4.1	3.5	7	4
hsa-miR-369-3p	2.16212	0	0.8	0.3	0	0	0	0.2	0	0	0.5	0	0	0	0.3	0	0	0.2	0	0	0	0.1	10.6	8.1	17.5	7.4	12.4	15.6	9	11.5	17.4	18	0	0	0	0	0	0	0	0	0	0.2	0.4	0	0	0	0.2	0.7	0.3
hsa-miR-548d-3p	2.15606	0	0	0	1.2	1	0.9	1.9	1.3	1	0.8	1.1	0.8	1.3	1.5	1.1	2	2.1	1.1	1.3	1.5	1.6	0	0	0.5	0.1	0.1	0.2	0.2	0.4	0.3	0	5.9	3.9	4.4	4.4	3.1	4.8	2.5	2.9	5.7	5.1	6.1	3.9	3.1	2.6	3.6	1.2	1.9
hsa-miR-548d-3p	2.15606	0	0	0	1.2	1	0.9	1.9	1.3	1	0.8	1.1	0.8	1.3	1.5	1.1	2	2.1	1.1	1.3	1.5	1.6	0	0	0.5	0.1	0.1	0.2	0.2	0.4	0.3	0	5.9	3.9	4.4	4.4	3.1	4.8	2.5	2.9	5.7	5.1	6.1	3.9	3.1	2.6	3.6	1.2	1.9
hsa-miR-6511a-3p	2.15606	0.1	0.4	0.4	0.6	0.6	1.4	1.4	1.5	1.7	1.1	2.3	1.8	2.2	1.6	1.6	1.7	1.7	1.2	1.7	1.5	1.4	0.2	0.1	0.1	0.1	0	0.3	0.5	0.8	0.8	0.5	3.2	2.8	3.9	3.7	2.9	3.9	2.6	2.6	3.3	4.8	3	2.9	3.2	3.4	4.8	4.7	5.2
hsa-miR-6511a-3p	2.15606	0.1	0.4	0.4	0.6	0.6	1.4	1.4	1.5	1.7	1.1	2.3	1.8	2.2	1.6	1.6	1.7	1.7	1.2	1.7	1.5	1.4	0.2	0.1	0.1	0.1	0	0.3	0.5	0.8	0.8	0.5	3.2	2.8	3.9	3.7	2.9	3.9	2.6	2.6	3.3	4.8	3	2.9	3.2	3.4	4.8	4.7	5.2
hsa-miR-6511a-3p	2.15606	0.1	0.4	0.4	0.6	0.6	1.4	1.4	1.5	1.7	1.1	2.3	1.8	2.2	1.6	1.6	1.7	1.7	1.2	1.7	1.5	1.4	0.2	0.1	0.1	0.1	0	0.3	0.5	0.8	0.8	0.5	3.2	2.8	3.9	3.7	2.9	3.9	2.6	2.6	3.3	4.8	3	2.9	3.2	3.4	4.8	4.7	5.2
hsa-miR-6511a-3p	2.15606	0.1	0.4	0.4	0.6	0.6	1.4	1.4	1.5	1.7	1.1	2.3	1.8	2.2	1.6	1.6	1.7	1.7	1.2	1.7	1.5	1.4	0.2	0.1	0.1	0.1	0	0.3	0.5	0.8	0.8	0.5	3.2	2.8	3.9	3.7	2.9	3.9	2.6	2.6	3.3	4.8	3	2.9	3.2	3.4	4.8	4.7	5.2
hsa-miR-511-3p	2.14545	0	0	0	0	0	0	0	0	0	0	0	0	0	0	0	0	0	0	0	0.1	0	0.2	0.3	0.6	0.3	1	6.9	3.1	9	2.4	4.3	0	0.3	0	0	0.2	0	0.4	0	0	0.5	0	0	0	0	0	0	0
hsa-miR-4707-3p	2.13939	0	0.4	0	0.2	0.5	2.6	1	2.6	0.8	1.4	3	3	1.7	2.9	3.1	3.4	3.4	2.5	3.6	3.7	3	9.1	0.6	1.7	0	0.9	0.9	0.5	1.1	1.8	1	1	1.8	1.9	1	1.8	1.3	1.4	1.5	1.4	1.4	1.2	1.6	1.8	1.3	1.1	2.1	1.6
hsa-miR-4687-3p	2.13636	0	0	0	0.3	0.3	0.3	0.4	1	0.4	0.9	0.7	0.2	0.8	0.3	0.1	1	0.2	0	0.5	0.1	0.6	1.7	3	0.7	0.5	0.6	0	0	0.1	0.2	0.6	5	5.5	2.5	4.7	4.3	5.8	6.9	6.9	5	2.5	5.6	4.9	2.2	2.9	1.9	3.2	2.3
hsa-miR-134-5p	2.13485	0	0	0	0	0	0	0	0	0	0	0	0	0	0	0	0	0	0	0	0	0	23.8	15.8	10.7	2.1	4.2	7.7	6.3	5.7	7.4	9	0.3	0	3.1	0	0	0	0	0	0	0	0	0	0	0	0	0	0
hsa-miR-548ap-5p	2.13182	0.8	0.4	0.1	0.2	0.2	0	0.3	0.1	0	0.1	0	0	0.1	0.2	0.1	0.1	0.1	0.4	0.1	0.4	0.1	47.4	43.3	23.6	7.3	6.1	0.9	0.7	1.3	0.9	1	0	0	0	0	0.1	0	0	0.1	0.1	0	0.2	0.1	0.4	0.1	0.1	0	0
hsa-miR-4664-3p	2.12424	0	0	0	4.6	2.3	7.3	5.9	4.9	5.9	7.5	7.5	8	7.5	8	7.4	6.7	6.2	7.6	7.1	10.1	7	0	0	0	0	0	0	0	0.3	0	0.2	0	0	0	0	0	0	0	0	0	0	0	0	0	0	0	0	0
hsa-miR-5010-5p	2.12273	0.4	0.8	0	0.1	0	0.3	0.8	0.3	0.6	0	0	0	0.2	0.5	0.6	0	0.3	0	0.3	0	0.1	22.7	35.8	4.8	7.4	7.9	0	0	0.3	0.2	0	0	0	0	0.2	0	0.2	0	0	0.5	0.1	0.2	0.5	0.2	0.1	0.2	0	0
hsa-miR-3679-5p	2.12121	2.6	2.8	1.4	0.1	0.1	0	0	0	0.2	0	0.2	0.5	0	0.2	0.1	0.1	0	0	0	0.1	0	10.2	8.4	0	0.1	0	0	0.3	0.6	0	0	3.2	3.2	2.5	0.8	1.8	3	2.1	5.1	4.5	4.2	4	2.1	3.3	2.2	2	1.1	1.3
hsa-miR-548s	2.10909	0.8	1.2	1.7	0.3	1.1	1.4	1.1	0.6	1.2	1.5	0.7	0.9	0.2	1.6	1.9	0.8	2.4	1.7	1.9	1.1	1.3	0.3	0.5	1.2	1.6	1.1	0.5	0.7	0.6	0.2	2.1	4.1	3.7	5.9	4.3	2.9	3.8	2.5	2.3	5.1	4.7	2.7	4.4	1.9	2.9	5	0.7	2.6
hsa-miR-4449	2.09697	2.3	0.8	1.1	0.5	0.6	0.7	0.4	2.1	0.8	1.2	1.8	3.5	0.4	1.8	0.7	0.3	2.1	1.9	2.8	0.6	0.1	1.6	0.5	0.1	0.6	0.5	6.1	11.5	10.1	10	7.8	0	0	0	0.4	0.4	0.4	0.4	0	0.2	0	0	0.2	0.5	0.8	0.2	0.4	0.7
hsa-miR-3653-3p	2.07576	14.7	12.3	11.2	0.5	0.2	0.3	0	0.5	0.2	0.2	0	0	0.2	0.3	0	0.6	1.2	0.8	0.6	0.1	0.4	0	0	0.2	0	0	4.8	3.9	2.9	5.2	5.5	1.5	2.4	2.5	4.3	2.9	1.9	2.1	0.8	1.6	1.4	2	1.8	4.6	3.2	1.5	7	6.8
hsa-miR-579-5p	2.06515	0	0.8	1.4	0.6	0.7	3.1	3	1.6	1.7	1.4	1.4	3	0.9	2.9	4.1	1.4	2.1	2.5	3	4	2.2	0.5	0.5	0.8	0.9	0.7	0.3	1.5	1.8	0.7	1	2.4	3.2	3.1	1.6	4.1	2.8	2.5	1.7	3	3.2	4.2	3.8	3.7	1.4	1.9	1.4	1.9
hsa-miR-676-3p	2.06515	0	0	0.3	0.1	0	0.2	0.6	0.3	0.6	0.2	0	0	0.6	0.2	0.1	0.4	0.3	0	0.2	0.8	0.4	0.2	0.6	1.6	0.7	0.6	1.4	2.1	2	0.7	1	5	5	5	5.1	2.9	3	5.5	6	5.6	4.3	4.8	4.1	4.6	5.1	4.6	5.6	5.5
hsa-miR-4671-3p	2.05606	0	0	0.3	0.5	0.6	1.8	1	0.3	1	0.5	0.5	0.7	0.9	0.6	1.5	0.6	0.5	2.3	0.5	1.1	1.6	0	0	0.1	0.1	0	1.4	0.2	1.4	1.1	1.5	0	0	0	0	0	0	0	0.2	0	0	0	0.2	0	0.3	0	0	0
hsa-miR-548z	2.03788	5.6	3.5	6	3	3	1.8	2.4	2.5	2.4	2	1.8	1.8	2.1	3.3	3	4.1	2.5	3.2	3.4	2.6	3.1	0.3	0.3	2.6	0.7	1	6.2	5	7	5.1	4.8	1.3	1.2	1.2	1	0.8	0.7	1.1	1.3	1.3	0.8	0.7	1.1	0.5	0.7	0.5	0.5	0.5
hsa-miR-548h-3p	2.0303	5.6	3.5	6	3	3	1.8	2.3	2.5	2.4	2	1.8	1.8	2.1	3.3	3	4.1	2.5	3.2	3.4	2.6	3.1	0.3	0.3	2.5	0.7	1	6.2	5	7	5.1	4.8	1.3	1.1	1.2	1	0.8	0.7	1	1.3	1.3	0.7	0.7	1.1	0.5	0.7	0.5	0.5	0.5
hsa-miR-1273g-3p	2.00606	0	0	0	0.3	0.3	0.2	0.2	0.3	0.1	0.2	0	0.4	0.1	0.4	1.2	1.1	2.8	1.5	3.6	0.9	0.8	0	0	0	0	0	2.7	3.8	1.8	2.3	2.1	1.3	0.4	1.6	1.5	0.8	2.9	1.1	2.2	1.1	0.7	1.4	0.9	1.3	1.1	0.4	2	1.8
hsa-miR-204-5p	1.99545	0.8	2.4	1.4	0.1	0	0	0	0.3	0	0	0	0	0	0	0	0	0	0	0	0.1	0.1	0.6	0.2	0.8	0.3	0.1	0.2	1.5	0.6	1.1	1.5	3.4	3.4	3.3	4.9	2.2	4.1	2.6	3.9	3.3	6.4	2.8	4.3	4.1	5.3	5.9	10.5	7.4
hsa-miR-5581-3p	1.98636	0.4	0.8	0.3	2	2.7	1	2.4	1	0.8	1.6	1.4	1.4	0.9	2.9	1.4	2.8	3.6	2.3	3.3	1.4	2.8	0	0	0	0	0	0.8	0.7	0.1	0.6	0.2	3.7	5.2	2.1	4.3	2.9	2.8	2.8	2.6	3.6	4.7	6	2.6	1.6	2.7	2.6	0.4	1.3
hsa-miR-548p	1.97879	0.4	0.6	0.2	1	1.1	1.3	1.6	1.8	1.8	2.1	1.3	0.8	2	2.4	1.9	2	2.5	1.6	1.4	1.8	2	0.2	0.2	1.2	1.2	0.7	1.6	1	1	0.8	0.6	4.5	3.4	3.7	4	2.9	3.4	1.8	2	4.6	3.4	2.7	2	3.5	2.5	2.6	0.9	1.6
hsa-miR-3138	1.97879	0	0	0.6	0.4	0.7	0.2	0.2	0.8	0	0.2	0.5	0.7	0.2	0.2	1.2	0.3	0	0.4	0.6	0.7	0.4	34.8	40.4	4.8	6	4.8	0	0.3	1	0.5	0.2	1	1.1	1.2	0.4	0.7	1.3	0.7	1.3	1.4	0.7	0.6	0.5	1.1	0.4	0.4	0.4	0
hsa-miR-4526	1.9697	0.8	1.6	0	0	0.1	0	0	0	0	0	0	0	0	0	0	0	0.2	0	0	0	0	0.8	0.5	0.4	0.2	1.3	0.3	0	0.7	0.3	0.6	2.6	3.7	5.2	5.3	4.5	3.4	4.7	3.7	3.1	3.2	5.8	5.1	4	2.3	1.9	1.1	1.3
hsa-miR-345-3p	1.9697	0	0	0	1.6	1.1	4.8	6.1	3.4	5.7	3.5	4.3	4.7	3.6	5.4	4.5	5.1	2.9	3.6	3.5	5.4	5.4	0.1	0.7	2.1	0.3	1	0.6	1.7	1.1	0.6	0.4	3.1	1.3	1.9	2.4	1.6	1.5	1.4	1.1	1.3	1.7	0.6	0.8	1	1.2	2.2	1.8	1.3
hsa-miR-34c-3p	1.96667	0	0	0	3.7	2.8	1.5	3.6	3.4	5.7	3	6.4	4.9	3.9	8.6	4.9	9	5.6	6.9	4.7	5.7	8.3	0	0	0	0	0	0.2	0	0	0.2	0.4	0	0	0	0	0	0	0	0	0	0	0	0	0	0	0	0	0
hsa-miR-146a-3p	1.96364	0.4	0	0.6	0	0.1	0	0.2	0	0	0	0	0	0	0	0	0	0	0	0	0	0	0	0.5	4	0	1.4	2.5	1.5	5.7	1.6	6.7	0	0	0	0	0	0	0	0	0	0.1	0	0	0	0	0	0	0
hsa-miR-6881-3p	1.96212	0.4	0.4	0.3	0	0	0	0	0	0.2	0.2	0	0.2	0	0	0	0	0.3	0	0	0	0.3	0	0	0	0	0.1	0	0.2	0	0.4	0.4	4.2	3.9	2.3	2.2	3.1	1.9	4.6	2.8	3.4	5.2	8.4	6	4.1	4.9	3.7	6	3.6
hsa-miR-7641	1.95606	0.8	2	0.8	0.3	0.3	0.2	0.8	1.2	0.4	0.9	0.2	0.2	0.4	0.2	0.6	0.3	0.8	1.1	0.6	0.7	0.6	4.8	2.2	9.7	13.2	3.2	10.3	2.6	1.2	1.9	2	0.4	0.5	0.2	0.5	0.5	0.6	0.5	0.3	0.1	0.3	0.4	0.3	0.2	0.3	0.8	1.2	3.1
hsa-miR-7641	1.95606	0.8	2	0.8	0.3	0.3	0.2	0.8	1.2	0.4	0.9	0.2	0.2	0.4	0.2	0.6	0.3	0.8	1.1	0.6	0.7	0.6	4.8	2.2	9.7	13.2	3.2	10.3	2.6	1.2	1.9	2	0.4	0.5	0.2	0.5	0.5	0.6	0.5	0.3	0.1	0.3	0.4	0.3	0.2	0.3	0.8	1.2	3.1
hsa-miR-5189-5p	1.95	0	0	0	0.1	0.4	0	0	0.3	0.4	0	0	0	0	0.2	0.1	0.6	0.2	0	0.3	0.3	0	22.8	9.6	1.9	2.1	1.7	0	0	0.1	0.4	0.4	3.6	3.7	3.9	3.9	3.4	2.3	3.2	3.9	2.3	4.2	2.6	2.9	2.4	1.7	3	4.9	6.2
hsa-miR-95-5p	1.94091	3	3.2	2.8	0.3	0.1	0.5	0.2	0.3	0.2	0.2	0.5	0.7	0	0.8	0.6	0.9	0.5	1.1	0.2	0.9	0.6	0	0.2	0.2	0.4	0.7	0.9	1.5	1	2.8	0.6	4.1	4.2	5.8	5.7	4.3	3.6	4.6	3.4	3.9	3.4	3.6	3.8	4.5	2.5	1.5	2.8	2.3
hsa-miR-129-2-3p	1.93636	0.4	0.6	0	0.6	1	0.7	2.4	3.1	2.1	1.9	4.3	2.6	3.4	3.7	3	3.5	2.2	1.8	1.3	4	6.9	0	0	0.2	0	0	0	0	0	0	0.1	1.8	2	2.5	2.4	3.6	2.6	3.3	2.4	4.4	4.4	3.2	2.3	3.1	1.8	2.4	1.8	3.6
hsa-miR-218-5p	1.93485	0.4	0	0.4	0.8	0.7	0.9	0.3	2.2	0.2	1.2	0.5	1.9	0.5	1.1	1.3	1.1	0.9	1	0.9	1.5	0.8	0	0	0	0	0	0.6	0.6	0.6	0.3	0.8	0.2	0	1.1	0	0	0	0	0.6	0	0	0	0	0	0	0	0	0
hsa-miR-6514-5p	1.92424	1.1	0	0	1.1	0	0.8	0.4	0.8	0.2	0.7	0.7	1.2	1.1	0.6	1.1	1.4	0.7	0.6	0.2	0.6	0.8	0.8	1	1.2	2	1.8	1.8	0.5	1	1.1	1.7	4.1	3.7	3.1	3.5	2.7	2.3	3	4.5	3	2.5	1.4	3.3	0.8	3.4	3.7	4.6	4.2
hsa-miR-26a-1-3p	1.92424	0	0	0	1.2	1.1	3.5	4.5	5.7	3.6	2.6	7	3.3	3.4	5.5	6.4	5.8	3.4	6.9	3.3	6.1	5.4	0.7	0.6	1.1	0.6	0.7	0.7	1.4	0.6	0.9	1.2	1.6	1.8	1.7	1	2.7	1.1	0.9	1.7	0.9	2	0.6	0.2	1.3	0.5	1.5	0.7	1.3
hsa-miR-1343-3p	1.92273	0	0.4	0.6	2.7	3.2	5	3.7	4.9	3.6	3.3	3.6	2.3	3.8	3.5	3.1	4.3	3.2	3.6	3.3	3	5.2	0	0	0.2	0.1	0	0.7	2.3	0.3	0.9	1	2	1.1	1	0.6	1.1	0.4	0.7	1.9	1.3	0.6	0.8	0.3	0.5	1	0.4	0	0
hsa-miR-218-5p	1.90303	0.4	0	0.4	0.8	0.7	0.9	0.3	2	0.2	0.9	0.5	1.4	0.5	0.9	1.3	1.1	0.9	1	0.9	1.4	0.8	0	0	0	0	0	0.6	0.6	0.6	0.3	0.8	0	0	1.1	0	0	0	0	0	0	0	0	0	0	0	0	0	0
hsa-miR-3159	1.89697	1.5	1.6	1.1	2	2.9	2.3	1.6	2.9	1.7	3.5	1.6	1.6	2.4	2.8	2.6	1.4	1.7	2.1	2.4	1.8	2.3	0.7	0.3	1.6	0.9	1.1	1.3	1.5	0.7	1.1	0.4	2.4	1.8	1.7	2.8	1.3	3.2	0.9	2.2	1.7	2.3	1.4	2.9	2.4	3.5	2.4	1.8	3.2
hsa-miR-3913-5p	1.87424	2.1	3.6	2.1	1	0.7	0.4	0.6	0.1	0.6	0.2	0.5	0.5	0.4	0.8	0.7	0.4	0.6	0.6	0.5	0.8	0.7	0	0.1	0.2	0.1	0.2	1.4	1.6	2	1.9	1.9	2.3	3.4	2.9	3.3	3	1.3	2.3	2	3.2	2.9	3.6	3.9	3.3	2.9	1.9	4	4.7
hsa-miR-3913-5p	1.87424	2.1	3.6	2.1	1	0.7	0.4	0.6	0.1	0.6	0.2	0.5	0.5	0.4	0.8	0.7	0.4	0.6	0.6	0.5	0.8	0.7	0	0.1	0.2	0.1	0.2	1.4	1.6	2	1.9	1.9	2.3	3.4	2.9	3.3	3	1.3	2.3	2	3.2	2.9	3.6	3.9	3.3	2.9	1.9	4	4.7
hsa-miR-6837-3p	1.85	2.6	1.6	1.1	1.4	1	1.2	1.6	1.8	2.1	1.2	1.1	1.4	0.9	1.1	1.1	1.9	2.1	2.5	3	1.8	2.1	0.1	0	0.3	0.4	0	3.6	2.7	2	2.7	2.9	2.6	2.1	1.9	2.8	1.6	1.5	3.2	3.6	2	2.1	1.6	2.5	1.3	1.8	4.4	2.5	3.2
hsa-miR-548ae-5p	1.84545	1.1	2.3	1	0.5	1.1	1.7	0.9	1.2	1	2	2	0.5	0.9	1.8	1.7	1.6	1.7	1.3	1.8	3	2.2	0.4	0.3	1	1.1	0.8	2.6	1.8	1.9	2.7	1.8	2.2	1.7	2.9	3.1	2.1	1.7	2.3	2.1	3.4	2.8	2	1.3	2.2	4.3	4.5	3.3	3.7
hsa-miR-5094	1.82879	0	0	0	1.9	1.1	0.3	0.6	0.8	0.6	1.4	0.5	1.9	0.2	1.2	0.4	1.5	1	0	0.2	0.4	0.4	0	0	0	0	0	0.5	0.2	0	0	0.2	5.7	3.4	3.1	4.9	2.5	2.8	2.5	4.1	4.7	5.8	2.4	2.8	2.7	1.9	2.6	1.8	2.9
hsa-miR-3136-5p	1.81818	4.2	2.4	5.6	2.5	2.2	1.5	2	3.6	1.5	1.6	2.5	1.9	2.4	2.5	1.7	3	0.9	3.4	1.6	3	0.9	0.9	1	2.9	1.3	2.7	0.7	2.1	1.5	0.5	2.5	1.3	1.6	0.6	1.6	1.3	2.1	1.8	1.3	2	1.2	1.6	1	1.8	1.6	1.3	1.4	2.6
hsa-miR-4433b-5p	1.79091	7.2	2.8	1.1	0	0	0	0	0	0	0	0	0	0	0	0	0	0	0	0	0	0	32	3.7	18.1	5.7	6.5	9.7	5.1	6.7	8.4	9.4	0	0	0	0	0	0.2	0	0	0.2	0	0	0	0	0	0	0	0
hsa-miR-708-3p	1.78788	4.5	6.3	61.5	0.1	0.2	0.2	0.8	1.3	0.2	0.2	0.5	0.9	0	0	0.5	0.8	0.5	0.8	1.1	0.6	0.3	0.1	0.1	0	0	0.1	5	5.1	9.3	7.1	4.2	0.1	0	0.6	0	0	0	0	0	0	0	0	0	0	0	0	0.4	0
hsa-miR-4423-5p	1.78636	0	0	0.6	8.4	8.6	5.6	4.7	4.4	5.2	4.9	4.3	4	3.8	4.6	4	4.7	6	3.1	3.8	5.4	4.8	0	0	0.3	0	0	0	0.2	1	0.9	1.1	0	0	0	0	0	0	0.2	0	0	0	0	0	0	0.1	0	0	0
hsa-let-7c-3p	1.77727	0	0	0	0	0	0	0	0	0	0	0	0	0	0	0	0	0	0	0	0	0	0	0	0	0	0	0.5	0	0.1	0.2	0.4	4.4	3.4	4.3	4.9	5	4.7	6.2	3.7	3.9	6.1	3.6	4.9	2.9	5.4	5.7	5.6	2.6
hsa-miR-545-3p	1.77576	0	0	0.3	2.2	2	0.2	0.4	0.8	0	0.7	0.9	0.7	0.4	0.6	0.7	0.9	0.2	1	0.3	1.5	0.8	0	0.2	0.2	0	0	0.5	1.9	1.7	0.2	0.6	3.2	3.4	4.3	1.8	2.9	1.7	1.8	3	4.4	3.8	3.6	1.6	2.4	1.6	1.5	2.1	2.9
hsa-miR-3916	1.74697	2.6	8.3	4.8	1	2.3	1.5	1	1.8	2.7	1.2	4.5	1.2	2.1	3.1	1.5	1.8	5.1	3.2	2.4	1.9	1.4	2.9	1.2	0.2	1	1	0	1.2	0.4	0.9	1.3	2.1	0.8	1	2.4	1.6	1.5	1.9	1.5	1.1	1.7	1.2	2.5	2.1	1.6	1.3	1.8	1.3
[truncated: 2,117 more rows]
[truncated: 18 more columns]

## Sheet: 191 miRNAs
191 miRNAs that are expressed in immune cells and targetting the Calcineurin/NFAT pathway
Genes	Targeting miRNAs
AKAP5	hsa-miR-7977
[truncated: 190 more rows]

[truncated: 3 more sheets: miRNA transcribed by NFAT, miRNA expression in T cells, NFAT induced miRNA with fc]
